# Supplementary material for: Meningioma transcription factors link cell lineage with systemic metabolic cues
Source: Oxford University Press journal article supplement (doi:10.1093/neuonc/noy057), 2018-04-11
Supplement: noy057_suppl_supplementary_tables.xlsx [file noy057_suppl_supplementary_tables.xlsx]

## Sheet: Table S1
Table S1. Clinicopathological characteristics of cases on meningioma HTMA283 & HTMA285
Clinicial Parameters	HTMA283 & 285 (n = 178)
Meningioma subtype
WHO grade I	112
Meningothelial	37
Fibrous	25
Transitional	31
Angiomatous	6
Psammomatous	8
Secretory	5
WHO grade II	43
Atypical	38
Chordoid	5
WHO grade III	23
Anaplastic	18
Rhabdoid	5
Age
Median	58
Range	27-89
Gender
Male	49
Female	129

## Sheet: Table S2
Table S2. Detailed outcome and biomarker data for meningioma patients with samples on HTMA283 and HTMA285
Patient ID	Pathology types	Grade	Gender	Age	TMA	priorRT	tx	GTR	Dead	Followup (dead)	Progression	Followup (progression)	EMA IHC	SIX1 IHC	FOXC1 IHC	FOXC2 IHC	BNC2 IHC	KLF5 IHC	MEOX2 IHC	LEPR IHC	SIX1 RNAscope	FOXC2 RNAscope	FOXD1 RNAscope	PTGDR RNAscope	LEPR TOTAL RNAscope	LEPR LONG RNAscope
1	Chordoid	2	Male	72	285	1	sx(gtr)	1	1	48.2667	1	1.36667	0	12	12	6.66667	10.5	9	9	0	1.36414	1.27685	1.34217		2.51364	0.902799
2	Anaplastic	3	Female	50	285	1	sx(str)	0	1	9.26667	1	0.0666667	7.66667	1	10.6667	6	5.33333	12	0	3	0.336781	1.24828	1.97136	0.39434	0.138989	0.0995859
3	Chordoid	2	Female	48	285	0	sx(gtr)	1	0	80.1	1	61.6333	12	9.33333	12	3.5	6	3.66667	0	0.333333
4	Anaplastic	3	Male	57	285	0	sx(gtr)+RT(66Gy)	1	0	103.7	0	77.8	8.33333	9	5.33333			7.33333	1	2	1.10023	1.72994	1.53722	2.48101	2.28541	0.533049
5	Chordoid	2	Female	37	285	0	sx(str)+RT(66Gy)	0	0	98.6	0	77.7333	6.66667	12	12	12	12	8.66667	4	0
6	Anaplastic	3	Female	83	285	0	sx(str)+RT(dose unknown)	0	0	51.5	0	13.5667	8	12	12	11	11
7	Angiomatous	1	Female	51	285	0	sx(gtr)	1	0	105.267	0	46.6333	0	8	10.6667	10.6667	2
8	Anaplastic	3	Male	63	285	1	sx(gtr) +RT(3000)	1	1	16.8	0	2.33333	6.66667	8	8	3	0	1	4	3	2.24814	0.712312	0.856838	0.885638	0.149471	0.134189
9	Fibrous	1	Female	47	285	0	sx(gtr)	1	0	34.0333	0	3.36667	7.33333	12	12	4	6	2	0.333333	8	2.40209	0.975234	1.25037	2.41051	16.3197	3.14103
10	Fibrous	1	Female	64	285	0	sx(gtr)	1	0	75.4667	0	17.5667	8	12	12	2	0.666667	2	1.66667	2	1.25913	1.09538	1.05608	1.69494		2.82274
11	Atypical	2	Female	64	283	1	sx(str)	0	1	12.7667	1	12.1	0	4	12	8	12	2	0	0	1.5791	1.58825	0.60317	0.971792	0.542924	0.280479
12	Chordoid	2	Female	48	285	0	sx(str)+RT(66)	0	0	89.4333	0	77.3	9	12	12	12	12	8	0	4		1.66176	0.793651	12.4217
13	Atypical	2	Female	66	283	1	sx(gtr)+RT(63.75)	1	0	48.8667	1	12.8667	12	5.66667	6.66667	3.33333	0	3.33333	0	0	2.26214	1.34927	1.60878	2.28925	0.968692	0.64333
14	Fibrous	1	Female	47	283	0	sx(gtr)	1	0	82.4	0	82.2	10	12	8	8	8	3		8	1.07145	2.29515	2.02297	3.48001	46.632
15	Transitional	1	Female	74	283	0	sx(gtr)	1	0	93.2	0	37.6667	0.666667	12	12	8	12	3	4	8	0.837913	0.894312	0.380963	1.78813	19.7297	0.856098
16	Transitional	1	Female	28	283	0	sx(gtr)	1	0	67.7667	0	39.1333	0.666667	8	8	8	8	2		1				2.83731
17	Fibrous	1	Female	55	285	0	sx(gtr)	1	0	8.03333	0	8.03333	7.33333	10.6667	10.6667	3	0	0	0.5	8	0.673797	1.17539	1.34324	2.34544	16.7136	1.72421
18	Atypical	2	Female	46	283	0	sx(GTR)+RT(61.2)	1	0	94.6	0	71.5	10	12	12	11	11	10.5	9	3.5	2.13768	3.20992	2.1423	3.33318	12.7875	1.57076
19	Atypical	2	Female	45	283	0	sx(gtr)	1	0	50.5333	0	50.5333	3.66667	12	9.33333	9.33333	12	2.33333	1.66667	6.66667	1.4933	4.32051	0.614798	2.51869	8.30276	0.914384
20	Fibrous	1	Female	54	285	0	sx(gtr)	1	0	78.8	0	78.8	10.6667	12	10.6667	4.66667	1.33333	3	3	7.33333	1.38088	1.00598	1.31412	2.65011		1.97274
21	Atypical	2	Female	58	285	0	sx(gtr)	1	0	78.4333	1	56.2333	7.66667	12	12	8	10.6667	9.33333	10.6667	4	2.59715	1.01556	1.41773	5.0956	3.66668	0.333012
22	Transitional	1	Female	86	283	0	sx(gtr)	1	1	24.9333	0	15.5333	12	6	6	4	8	0.333333	0.5	8	0.285981	0.438269	0.563062	1.62687	2.70372
23	Transitional	1	Female	77	283	0	sx(str)+RT (54)	0	1	25.2333	1	16.4	8	12	12	12	12	12	8	3	5.79072	3.1783	1.87978		5.74753	0.976577
24	Meningothelial	1	Female	45	283	0	sx(gtr)	1	0	81.6	0	48.3333	10.6667	12	8	8	8	3		8		2.31522	2.1	0.644444	22.4077
25	Meningothelial	1	Male	63	283	0	sx(gtr)	1	0	78.4333	0	60.9333	12	12	12	9.33333	12	9		8	2.34875		2.71528	4.04425	0.151745	5.70732
26	Atypical	2	Female	40	283	0	sx(str)	0	0	77.6667	1	14.9	3.66667	12	12	12	8	6.66667	8	4	2.0359	3.63996	1.01667	2.58793	1.57131	0.147457
27	Fibrous	1	Female	54	283	0	sx(str)	0	1	31.2333	0	26.4	4	8	8	8	7.33333	1		3	2.20384	1.16771	1.47233	4.0248	9.79037	1.47144
28	Fibrous	1	Female	84	285	0	sx(gtr)	1	0	3.7			8.66667	12	12	6.66667	1.66667	2	2	8
29	Transitional	1	Female	48	283	0	sx(str)	0	0	79.7	0	67.9333	7.33333	12	7.33333	8	9	1.66667	1	9				1.2005
30	Psammomatous	1	Female	64	283	0	sx(gtr)	1	0	16.9	0	14.7333	9.66667	12	5.33333	8	8	3.5	1	4.5	4.33333			2.12141	11.1905	3.30189
31	Meningothelial	1	Female	42	283	0	sx(gtr)	1	0	52.9667	0	52.9667	12	12	12	8	8.5
32	Anaplastic	3	Female	81	285	1	sx (str)	0	1	1.23333	0	0	8	8	9.33333	2.66667	0	1	0	3	2.42422	1.2513	2.3841	5.74009	4.31982	0.82792
33	Anaplastic	3	Female	89	285	0	sx(gtr)+RT(59.4)	1	0	27.0333	1	18.4333	6.66667	6	9.33333	3	0	8	2.66667	1	1.46619	1.78062	1.59197	6.11791	4.74662	1.05633
34	Transitional	1	Male	45	283	1	sx(gtr)	1	0	81.4667	0	69.8	10	12	12	12	12	8.66667		6.66667	3.42319	2.13439	2.40413	3.63425	4.32911	0.532585
35	Atypical	2	Female	79	283	0	sx(gtr)+RT(54)	1	0	34.1	1	26.3667	8	12	12	10.6667	10.6667	3.33333	3	4.66667	3.11097	1.5	0.923315		14.949	1.47667
36	Atypical	2	Male	67	283	1	sx(gtr)	1	1	75.5333	0	0	12	8	9.33333	4	8	2	1.66667	3.66667	5.16162	1.17864	0.980382	2.28916	5.00492	0.308363
37	Fibrous	1	Female	38	283	0	sx(gtr)	1	0	76.6333	0	51.6	12	8	8	4	5.33333	0	0.333333	4	1.74806	0.743502	0.867706		17.4564	2.97778
38	Atypical	2	Female	55	285	0	sx(gtr)	1	0	76.1667	1	14.5333	0	12	9.33333	8	3	3.33333	4	3	0.881608	1.10774	1.51513	2.61838	5.20135	1.08242
39	Angiomatous	1	Male	62	283	0	sx(gtr)	1	0	34.5333	0	0.766667	2.33333	7.66667	6.33333	4.5	9.33333	6	3	1			1.9771
40	Fibrous	1	Female	70	283	0	sx(str)	0	0	70.3333	1	10.8333	5.33333	12	12	10.6667	12	8	4.5	4	2.34244	1.39413	2.01707	3.20388	13.11	1.18036
41	Meningothelial	1	Female	54	283	0	sx(gtr)	1	0	4.53333	0	4.4	6.66667	10	9	12	8	8		2	1.82178	2.9742	3.66447	3.51935	5.61649	0.686857
42	Atypical	2	Female	57	283	0	sx(gtr)	1	0	78.7333	0	70.3	4	12	9.33333	12	8	8	9	6.66667	2.43076	2.20825	1.19369	1.31366	2.22699	0.464221
43	Anaplastic	3	Female	64	285	1	sx(gtr)+RT (30.6)	1	0	20.6333	1	13.7667	0	0.333333	2.33333	3	0	2	0	1	0.896149	1.6356	1.01833	0.923781	1.43591	0.314171
44	Anaplastic	3	Female	51	285	0	sx(gtr)	1	0	60.4	0	54.3333	0	5.33333	0	10.5	12	1.5	0	1.5	1.94495	0.218627	0.326161	0.387097	0.273885	0.0747296
45	Meningothelial	1	Female	66	283	0	sx(str)	0	0	75.4667	0	65.1333	4.66667	12	12	12	12	9						1.34052
46	Meningothelial	1	Female	56	283	0	sx(str)	0	0	68.2333	0	58.5667	8	12	12	12	12
47	Meningothelial	1	Female	59	283	0	sx(gtr)	1	0	69.1	0	46.9333	2	12	12	12	12	12	8	12	1.57115	1.93822	0.618384	4.84878
48	Chordoid	2	Male	89	285	0	sx(gtr)	1	0	68.9333	0	56.4667	9.33333	12	12	12	7	12	10	4	9.95603	5.60013	4.54558	13.5872	8.73599	0.617333
49	Atypical	2	Male	74	285	0	sx(str)+RT(55.8)	0	0	72.1333	0	59.7667	10	12	5.33333	6.33333	5.33333	6.66667	4.66667	4	2.60146	1.95976	2.16428	7.37762	1.99626	0.651155
50	Anaplastic	3	Male	46	283	1	sx(gtr)	1	0	64.5	0	53.6667	7.33333	12	0	8	8	2	0	8	4.39808	1.20273	0.470563	1.25529	4.17598	1.28699
51	Atypical	2	Male	58	285	0	sx(gtr)	1	0	75.5	0	41.1667	9	0.666667	11	8	5.33333	12	2.66667	1	0.459152	2.17021	2.69865	2.48833	1.96152	0.776522
52	Fibrous	1	Female	55	283	0	sx(gtr)	1	0	74.9667	0	41.6	8.33333	12	12	8	12							0.392857
53	Atypical	2	Female	39	285	0	sx(str)	0	0	29.3	0	29.3	6	12	12	9.66667	6.33333	6.66667	3.33333	8	4.02821	2.30916	2.33464	2.60252	27.9235	2.64465
54	Fibrous	1	Female	31	285	0	sx(gtr)	1	0	8.7	0	3.33333	0.666667	10.6667	12	8	0	1.66667	0.666667	6.66667	0.791423	1.02476	0.687694	4.78251	36.2357	0.946302
55	Transitional	1	Female	44	283	0	sx(gtr)	1	0	41.8333	0	20.6667	12	12	12	12	12	12		4	2.05878	4.62645	0.901138		5.72618	0.317816
56	Atypical	2	Male	54	285	0	sx(gtr)+RT(54)	1	0	71.1667	0	58.7	8	12	12	7	6	9.33333	5.33333	2	1.16078	1.37204	2.49128	2.48392	1.64693	0.411656
57	Meningothelial	1	Female	78	283	0	sx(gtr)	1	0	67.7	1	19	12	12	8	10.6667	10.6667	8		7	1.25134		0.459732	0.949419	1.13164	2.32941
58	Psammomatous	1	Female	56	285	0	sx(gtr)	1	0	19.9	0	19.9	5.33333	12	12
59	Atypical	2	Female	58	285	0	sx(gtr)	1	0	4.2	0	4.2	9	10	11	6	7	6.66667	3	7.66667	2.51978	1.66402	2.03039	5.17647	15.3244	1.95046
60	Meningothelial	1	Female	54	283	0	sx(gtr)	1	0	39.4667	0	16	9	12	12	8	8	8	3	3	6.72759	2.19332	1.44355	1.31633	8.16819	1.75369
61	Transitional	1	Male	49	283	1	sx(gtr)	1	0	73.1333	0	64.0667	1	12	8	8	11	3		4	2.06108	1.74112	1.97786	2.7734	2.53249	0.750828
62	Fibrous	1	Female	64	285	0	sx(gtr)	1	0	48.6333	0	27.3333	11	8	6.66667	2	0	1	0	5
63	Meningothelial	1	Male	58	283	0	sx(gtr)	1	0	45.6333	0	45.6333	2	8	6	8	6	5.33333		1	1.52197	1.91062	1.28631	2.08752	8.26721	0.738878
64	Fibrous	1	Female	59	283	0	sx(str)	0	0	34.4667	1	34.1	12	9	7.33333	6.66667	6.33333	0.333333	0.666667	9.33333	4.68963	3.67398	1.69593	3.5626	10.827
65	Transitional	1	Female	61	283	0	sx(gtr)	1	0	61.7667	0	10.5	8.66667	9.33333	12	11	7.33333	10.5		1	3.65049		1.8535	3.83746	1.17152
66	Fibrous	1	Female	47	283	0	sx(gtr)	1	0	16.3667	0	16.3667	11	11	9.33333	7.33333	8.33333	4.33333	7.5	4	2.64866	2.2764	1.04643	1.35236	0.157777	1.60067
67	Meningothelial	1	Male	48	283	0	sx(gtr)	1	0	75.7	0	38.4333	8	12	12	12	12	8.33333		2	2.3872	1.22485	2.51459		5.14433	0.484677
68	Transitional	1	Female	51	285	0	sx(gtr)	1	0	73.1333	0	53.7667	10	12	12	4	0
69	Atypical	2	Female	56	285	0	sx(gtr)	1	0	72.2	0	35.5333	6.66667	12	12	12	7	9	8	4.66667	1.13758	2.16344	2.24232	2.4623	6.89472	0.741316
70	Transitional	1	Female	51	283	0	sx(gtr)	1	0	63.6	0	16.6	3.66667	12	12	12	12	6.66667	2	9.66667			0.581808		8.083
71	Anaplastic	3	Female	68	283	99	99	99	1				10	10	10	6	0.666667	7.33333	3.66667	2	3.24048	2.27473	3.20581	1.18717	0.376328	0.29434
72	Transitional	1	Female	69	283	0	sx(gtr)	1	0	62.6667	1	52.6333	8.33333	12	12	12	12	9	3.5	7.33333	2.68754	2.1461	1.13505	4.99749	7.05065	1.41372
73	Transitional	1	Female	58	283	0	sx(gtr)	1	0	6.33333	0	6.13333	10.6667	12	8.66667	6.33333	11	6.33333		8	3.7565	2.90058	2.2729		14.8304	2.91367
74	Transitional	1	Female	52	283	0	sx(gtr)	1	0	0.533333	0	0.0666667	2	12	12	12	12	8	6	9	1.38893	1.61182	0.617029	2.52431	5.0129	0.613732
75	Anaplastic	3	Female	68	285	99	99	99					11	5.33333	5.66667	2	0	4	2	1	0.859541	0.698834	2.25568	2.13367	0.838516	0.24108
76	Transitional	1	Female	80	283	0	sx(gtr)	1	0	0	0	0	12	12	12	8	8	7.33333	2	8	5.91402	2.39132	2.39895	3.1968	18.3744	2.45284
77	Meningothelial	1	Female	43	283	0	sx(gtr)	1	0	51.8333	0	51.8333	9	11	11	12	10	4.33333	5.33333	4
78	Atypical	2	Female	59	285	0	sx(gtr)	1	0	64.0333	0	51.1333	4.33333	9	10.6667	6	1	4	4.66667	2.66667	0.917135	0.836897	1.33429	1.5404	4.7822
79	Atypical	2	Female	53	285	0	sx(gtr)	1	0	0.266667			12	12	12	12	8.33333	8.33333	0	7.33333	6.56109	2.18209	3.52364	5.59802	33.8281	2.23603
80	Meningothelial	1	Female	41	283	0	sx(gtr)	1	0	71.4667	0	59.8333	12	12	12	8	8	6.66667	2	7.33333	1.22109				1.78733
81	Meningothelial	1	Female	42	283	0	sx(gtr)	1	0	67.7667	0	52.7	8.33333	12	12	12	12	9	2	4	0.461962	1.81345	2.45495	3.3213	0.212402	1.32763
82	Transitional	1	Female	45	283	0	sx(gtr)	1	0	58	0	8.53333	12	12	12	10.6667	12	6.66667		3	3.35837	2.23562	1.40452	5.6594	17.8476	2.80525
83	Meningothelial	1	Female	77	283	0	sx(gtr)	1	0	36.9333	0	17.4	2.66667	12	12	12	12	8	0.333333	10.6667	2.36617	2.43173	0.785426	6.27514	30.9393	4.92932
84	Psammomatous	1	Female	60	283	0	sx(str)	0	0	0.3			12	12	12			3		8
85	Atypical	2	Male	58	285	0	sx(gtr)	1	0	69.7667	1	0	3.33333	12	12	3	1.5	3	0	2.33333	1.25342	1.06136	2.02364	1.9668	1.71865	0.485382
86	Anaplastic	3	Female	49	285	1	sx(str)	0	1	1.53333	1	1.53333	2.33333	0.333333	4.66667	2.33333	4	7	12	1	0.12586	1.59783	1.79759	0.765785	0.621888	0.139767
87	Atypical	2	Female	53	285	0	sx(gtr)	1	0	53.6333	0	3.13333	7.33333	12	12	5.33333	8	7		2	2.04899	0.942389	1.87929	1.65655	13.0833	0.924641
88	Meningothelial	1	Male	42	283	0	sx(str)	0	0	70.5667	1	48.5333	8	12	12	12	12	6.66667	0.333333	8	0.905861	1.54695	2.05284	6.04848	0.0643288	1.6613
89	Psammomatous	1	Female	79	283	0	sx(str)	0	0	64.2	0	16.5	11	8	8	8	8	0		9
90	Meningothelial	1	Female	49	283	0	sx(gtr)	1	0	37.9333	0	38.6	12	12	12	12	12	12		8	3.46358		0.620635			1.48387
91	Meningothelial	1	Female	46	285	0	sx(str)	0	0	56.3333	0	44.2	11	12	9.33333	8.33333	6	3	2	8	5.96873	1.43431	1.74304	5.10618	121.773	1.37986
92	Meningothelial	1	Male	68	285	0	sx(str)	1	0	57	0	48.3333	10	12	12	10	6
93	Meningothelial	1	Male	59	285	0	sx(gtr)	1	0	43.1	0	38.0667	10	10.6667	9.33333	4	8	6.66667	2.33333	8	11.059	1.82173	3.58974	9.78199	60.0402	2.20552
94	Meningothelial	1	Female	49	283	0	sx(str)	0	0	59.7333	0	53.4667	12	12	12	12	12	11	8	8.66667	2.13341	1.43284	0.852547	3.51748	3.71585	2.91223
95	Fibrous	1	Male	65	285	0	sx(gtr)	1	0	11	0	0.0666667	0	12	12	7.66667	3.5	2	0	7.66667	2.67394	4.26922	2.89915	10.9035	34.541	1.80014
96	Atypical	2	Female	61	283	0	sx(str)+RT(61.2)	0	0	61.6333	0	43.6333	7.66667	12	12	8	8	9						1.86751
97	Angiomatous	1	Female	65	285	0	sx(gtr)	1	0	50.7333	0	50.5667	12	12	12			8	11	6.66667
98	Angiomatous	1	Male	66	285	0	sx(gtr)	1	0	47.3667	0	2.7	12	12	12	6	3	10.5
99	Atypical	2	Female	47	285	0	sx(str)	0	0	20.1	0	20.1	9.33333	8	9.33333	6	5.33333
100	Atypical	2	Male	84	285	0	sx(gtr)	1	0	53.4333	0	12.1	12	12	12	9.33333	8	6.66667	0.666667	12	4.0333	3.26163	1.9132	4.11797	60.1067	2.24312
101	Transitional	1	Female	42	285	0	sx(gtr)	1	0	35.8	0	35.8	9	12	12	8	8	8	4	8	4.88848	1.90986	1.10052	6.46937	93.7717	2.05824
102	Psammomatous	1	Female	69	285	0	sx(gtr)	1	0	53.0667	0	11.2333	12	12	12	12	12	8	1	8		3.3908			24.3685
103	Meningothelial	1	Male	65	285	0	sx(str)	0	0	25.6333	0	0.166667	5.33333	12	9.33333	6	7	3.33333	12	2	1.8445	2.15584	0.536989	0.959026	4.95361	0.302268
104	Anaplastic	3	Female	56	285	99	99	99	1				8.66667	6.66667	7.66667	8	7	7	0	1	0.511551	0.461472	0.812776	0.412266	0.240168	0.200539
105	Fibrous	1	Female	57	283	0	sx(gtr)	1	0	42.2333	0	42.2333	10	12	12	9.33333	10.6667	2	4	9	2.52649	2.0533	1.20311	4.94692	8.69729	2.93734
106	Transitional	1	Male	63	283	0	sx(gtr)	1	0	62.1667	0	37.1	5	12	12	10.6667	12	5.66667	2	8	3.4222	1.90758	1.19609	8.29091	5.97258	2.13757
107	Fibrous	1	Female	71	283	0	sx(gtr)	1	0	39.0667	0	39.0667	9.66667	12	10.6667	6.66667	7.33333	3	0.666667	8	8.70761	2.99453	1.22878	1.57334	41.4888	2.99841
108	Atypical	2	Female	62	285	0	sx(str)+RT(59.4)	0	0	62.3	0	49.4	8	12	12	8	1.33333	8	0	7.33333	6.63254	1.51954	1.86486	3.54691	15.9126	2.85047
109	Meningothelial	1	Female	54	285	0	sx(gtr)	1	0	56.2333	1	31.2667	6	12	12	12	8	12	7.33333	8	6.33862	3.61255	2.92661	7.12609	45.8401	2.86356
110	Meningothelial	1	Female	49	285	0	sx(str)	0	0	56.1	0	32.7333	12	12	12	12	8	6.66667	8	6.66667	4.99083	3.34143	2.52984	6.72611	55.7789	1.37446
111	Anaplastic	3	Female	50	285	1	sx(str)	0	1	21.3333	1	6.83333	7.66667	12	12	11	11	12	7	5.33333	2.96454	2.74984	1.29986	1.48249	1.31264	0.14967
112	Anaplastic	3	Male	60	285	0	sx(gtr)+RT(60 Gy)	1	0	43.7667	0	36.6667	2.33333	4	2	0	0	1.66667	2.33333	2	1.15489	0.578139	1.01226	1.1708	1.06489	0.311172
113	Transitional	1	Female	58	285	1	sx(gtr)	1	0	38.2333	0	0.0333333	12	12	12	12	8	11	2.66667	12	6.58332	5.66534	2.3031	5.45278	163.379	1.91811
114	Atypical	2	Female	58	283	0	sx(str) +RT (59.4)	0	0	53.3	1	5.6	8.5	10	10	3.5	9	3.33333	4	10	2.39143	1.88815	0.927102	2.50951	4.40386	1.46821
115	Angiomatous	1	Male	64	285	0	sx(gtr)	1	0	39.4333	0	39.4333	12	12	12	9.33333	6.5	12	12	6
116	Fibrous	1	Female	60	285	0	sx(str)	0	0	46.2333	0	46.2333	9	12	12	11	3.33333	3.33333	0	8.33333	4.45233	4.17123	2.59947	4.94926	42.9709	5.8964
117	Transitional	1	Female	71	283	0	sx(gtr)	1	0	9.4	0	9.4	8	12	12	8	9.33333	7	0	4.5	7.95722	2.83299	1.42778	2.77029	10.2778	3.33629
118	Meningothelial	1	Male	58	283	0	sx(gtr)	1	0	0.3			10	9	11	6	8.66667	6	9	3	2.72101	2.16075	2.578	1.83199	1.1441	0.431022
119	Meningothelial	1	Female	52	283	0	sx(gtr)	1	0	27.1333	0	54.8333	9.66667	12	12	12	12	12	4	9	6.6544		2.5845		12.0231
120	Transitional	1	Female	47	285	0	sx(gtr)	1	0	55.3333	0	41.0667	7.33333	9.33333	10.6667	6.66667	2.33333	7	0	4
121	Atypical	2	Male	75	283	0	sx(gtr)	1	0	43.4667	0	36.9	6.66667	12	12	12	9	6.66667	7	4	2.28479	4.29274	1.38219	1.94452	3.93403	1.26618
122	Anaplastic	3	Male	57	285	0	sx(str)	0	0	0.133333	0	0.0666667	5.33333	10.6667	12	8.66667	6	7.33333	5.33333	1.33333	3.04688	0.782877	2.5478	4.7006	1.99301	0.300282
123	Angiomatous	1	Female	84	285	0	sx(gtr)	1	0	39.3	0	20.7667	7.66667	12	7.33333	7	3	6.33333	2.66667	1
124	Fibrous	1	Female	66	285	0	sx(gtr)	1	0	12.2	0	0.166667	12	12	12	6.66667	2	6.66667	2.5	12	1.62262	1.38153	1.39031	2.70133	9.95652	2.24885
125	Transitional	1	Female	44	285	0	sx(gtr)	1	0	35.2333	0	29.1667	7.33333	12	12	12	12	7.33333		8	8.90425	4.23892	5.06818	6.03179	167.104	5.8625
126	Transitional	1	Male	77	285	0	sx(gtr)	1	0	11.9667	0	0.0333333	4.66667	12	12	8	7.33333	2.66667	0.333333	0	2.08227	2.14977	1.60175	5.75046	11.9913	1.14881
127	Anaplastic	3	Male	40	283	1	sx(str)+RT (60)	0	0	15.9667	0	15.9667	7.33333	12	11	8	6.33333	6.66667	7	2.66667	3.21927	2.33388	1.37214	2.60394	0.878962	0.435148
128	Transitional	1	Male	62	283	0	sx(str)	0	0	50.1667	0	37.0667	3.33333	8	8	8	6.66667	2	8	2.33333	0.800029		2.06661		0.401601	0.784615
129	Anaplastic	3	Female	85	285	1	sx(gtr)	1	0	21.5	1	13.4	4	12	10.6667	3.66667	3	4.66667	5	2	2.35152	1.84919	0.896206	2.0329	2.95034	0.315761
130	Meningothelial	1	Male	58	283	0	sx(gtr)	1	0	23.2667	0	4	11	12	12	8	6.66667	1.66667	5	6.66667	9.25489	4.07003	1.29889	5.02126	29.7014	5.32179
131	Atypical	2	Female	49	285	0	sx(gtr)	1	0	33.4667	0	32.8333	8	6.66667	8	3.33333	0	4.66667	1.33333	4.66667	2.66111	2.15515	1.10901	4.72539	2.74779	0.705643
132	Atypical	2	Female	72	285	0	sx(gtr)	1	0	42.8333	0	29.6667	2.66667	7.33333	5.66667	2	0	8	0.333333	3	1.14952	1.26096	4.74174	8.53882	6.56011	1.00285
133	Secretory	1	Female	65	285	0	sx(gtr)	1	0	40.2667	0	40.2667	2	12	12	10	9.33333	6.66667	7.33333	12	3.2139	1.43519	1.80826		28.7106	2.59314
134	Secretory	1	Female	46	285	0	sx(gtr)	1	0	33.5667	0	9.16667	9	12	12	12	12	12	11	8	8.08251	4.36022	2.43415	9.98481	25.4544	2.4011
135	Psammomatous	1	Female	86	285	0	sx(gtr)	1	0	3.86667			10.6667	12	12	8	6.66667	3.33333	3.33333	8	8.51213	4.12702	3.1954	4.81175	83.272	2.57701
136	Fibrous	1	Female	53	283	0	sx(gtr)	1	0	37.0667	0	30.6	10.6667	12	12	8	12	5.33333	1.66667	11	4.1034	1.80813	1.83641	3.64608	39.3372	4.43719
137	Transitional	1	Male	70	283	0	sx(gtr)	1	0	42.0333	0	29.6667	0	12	12	8	8	6.66667	6	0	4.05127	3.38005	0.971494		1.77538	0.854172
138	Fibrous	1	Female	66	285	0	sx(str)	0	0	29.3333			2.66667	10	12	5	2.66667	0	0	2.66667
139	Psammomatous	1	Female	60	285	0	sx(gtr)	1	0	37.7667	0	1.86667	2.33333	12	8			4	1	1	5.75				11.2067	2.23792
140	Meningothelial	1	Female	58	285	0	sx(gtr)	1	0	45	0	29.5333	6	12	12	11	12	9		8
141	Transitional	1	Female	66	285	0	sx(gtr)	1	0	46.0667	0	0.233333	10.6667	12	12	9.33333	8	10	4	8	4.10754	2.32463	3.4635	11.4521	158.213	4.08095
142	Secretory	1	Female	59	285	0	sx(str)	0	0	4.26667	0	3.93333	1.5	12	12	9	9	4	0	12	3.39828	2.12698	1.91061	2.93122	3.38425
143	Transitional	1	Female	40	283	99	99	99					7.33333	12	12	9.33333	9.33333	0		4	5.89775	2.56546	2.51719	2.11587	1.18034	0.241634
144	Transitional	1	Female	40	285	0	sx(gtr)	1	0	23.6	0	23.6	4.33333	12	12	5.66667	2	6.66667	3	7.33333	3.09956	2.12204	5.29484	4.46739	103.495	2.75538
145	Transitional	1	Female	46	285	0	sx(gtr)	1	0	37.2333	0	21.8	9	12	12	12	7.33333	11	6	8	11.3018	7.53165		10.9418	60.255	2.53391
146	Atypical	2	Female	65	283	1	sx(gtr)+RT(66)	1	0	47.3667	0	38.2	8.66667	8	10.6667	4	6.66667	3.33333	0.333333	1	4.98371	2.76927	0.79565	2.28026	0.365119	0.446948
147	Transitional	1	Female	42	283	1	sx(gtr)	1	0	33	0	9.66667	9.33333	12	10.6667	4	8	1	0	6.66667	2.12181	0.710178	0.970764	2.35059	0.116088	0.809385
148	Atypical	2	Female	62	285	0	sx(gtr)	1	0	29.6	0	18.1667	9	12	12	11	9.66667	8	8	6.66667	12.1325	4.76526	2.39093	4.62056	121.314	3.63495
149	Meningothelial	1	Male	56	283	0	sx(gtr)	1	0	50.6333	0	37.0333	10	12	12	8	8	2.33333	3	6.66667	8.62702	4.87597	4.17512	5.6036	0.132017	4.99884
150	Meningothelial	1	Female	75	283	0	sx(gtr)	1	1	2.96667	0	2.56667	11	12	12	12	12	4.5		3
151	Meningothelial	1	Male	85	285	0	sx(str)	0	1	2.93333	0	0	11	12	8	6	4	1	1	8
152	Atypical	2	Female	85	283	0	sx(gtr)	1	0	43.2333	0	26.9667	10.6667	12	9.33333	8	6.66667	3.33333	8	5.33333	3.39067	1.8001	1.4834	4.8131	2.67511	0.496855
153	Atypical	2	Male	50	285	0	sx(str)+RT(63 Gy)	0	0	51.4333	0	38.5667	7.33333	8	8	8	0	8	7	4	0.78724	1.73173	1.60263	3.42221	5.34562	0.556099
154	Meningothelial	1	Female	52	283	0	sx(gtr)	1	0	31.6333	0	31.6	2	12	10.6667	10.6667	12
155	Meningothelial	1	Female	84	283	0	sx(str)	0	0	43.6667	0	31.7667	6.66667	12	12	12	10.6667	2.66667	9	1.33333	3.21093		0.775713	1.79197	3.91932	0.789313
156	Secretory	1	Male	56	285	0	sx(gtr)	1	0	40.9	0	18.4667	12	12	12	10.6667	8.33333	8	6	11	3.81393	2.59812	1.89115	4.49597	13.4738	3.0515
157	Meningothelial	1	Female	63	283	0	sx(gtr)	1	0	45.1333	0	0.0333333	9.66667	5	5	6	8	0	6	0	2.1549	2.54962	2.37185	4.19045	9.36201
158	Meningothelial	1	Female	36	285	0	sx(gtr)	1	0	32.4667	0	32.4667	10	12	12	12	12	12	0	3.66667	12.2809	2.8087	6.14997	7.00902	17.8386	1.83659
159	Meningothelial	1	Male	86	283	0	sx(gtr)	1	0	42.3	0	22.0667	9.66667	12	12	12	12	12	6	12	6.55827	2.37945	2.54953	9.99375	112.736	8.08252
160	Atypical	2	Male	44	285	0	sx(gtr)+RT(54 Gy)	1	0	43.8	0	35.2667	1	3	8	2	0	1	0	1.33333	0.594582	1.54441	0.7425	0.585862	6.41714	1.35576
161	Atypical	2	Male	76	285	99	99	99					6.33333	12	9.33333	9.66667	9	7.5	9	2	4.61227	2.93	1.59743	2.70111	4.67429	0.625186
162	Fibrous	1	Male	27	285	1	sx(gtr)	1	0	39.1333	0	22.8333	0	12	8			1		1
163	Atypical	2	Male	54	285	99	99	99					8.33333	5.33333	8	3.66667	0	2	4	1	3.38312	2.55834			3.93949	0.275307
164	Fibrous	1	Female	48	285	0	sx(str)	0	0	35.2333	0	26.1333	10	12	8	3	0.666667	0	3	10	7.12579	1.95555	2.3003	5.01547	181.006	5.20611
165	Atypical	2	Female	65	285	0	sx(gtr)	1	0	35.6667	0	26.3	6	12	12	12	8	12	6	5.33333	6.40716	4.51879	8.00889	16.7427	1.0326	0.0959311
166	Atypical	2	Male	88	285	0	sx(str)	0	0	18.3	0	17.8667	7.33333	10.6667	10.6667	7.33333	0	6.66667	8	1.66667	0.825625	1.13876	1.45485	1.0299	0.485738	0.535808
167	Psammomatous	1	Female	69	285	0	sx(gtr)	1	0	38.3667	0	1.36667	6	12	12			8
168	Fibrous	1	Female	43	285	1	sx(str)	0	0	38.2667	0	25.7667	8	12	12	8	4.66667	5	4	3.66667	2.72714	2.54334	3.5443	7.50947	10.0889	2.11083
169	Atypical	2	Female	47	285	0	sx(str)+RT(66 Gy)	0	0	27.3667	0	27.3667	8	12	12	12	12	10.6667	8	8	9.59017	5.43716	5.54084	7.67117	7.3899	0.384711
170	Secretory	1	Male	87	285	0	sx(str)	0	0	36.5	0	29.4333	9.66667	12	12	12	9	6	9	8	2.09904	2.85001	2.1719	3.08338	4.56076	2.14413
171	Meningothelial	1	Male	63	285	0	sx(str)	0	0	5.2	0	5.2	1	8	8	8	5	5	3	1	2.28652	1.48062	1.89175	2.67181	2.8115	1.46252
172	Fibrous	1	Female	53	285	0	sx(gtr)	1	0	30.5333	0	18.1667	6.66667	12	12	12	8	4	3.5	10.6667	6.44208	2.50666	2.52985	5.44521	38.8972	2.48578
173	Transitional	1	Female	75	285	0	sx(gtr)	1	0	19.8333			12	12	12	8	8	8	5.33333	5.66667	8.28509	5.79472	2.7407	5.51564	113.768	1.43447
174	Rhabdoid	3	Female	34	285								1	3.33333	6.66667	2	6	3	4.5	2	1.33891	1.16364	0.978811	2.73632	5.15768	0.904691
175	Rhabdoid	3	Male	71	285								1.33333	12	12	7.33333	2.33333	4.66667	3	0.333333
176	Rhabdoid	3	Female	46	285								6	5	7.33333	5	6
177	Rhabdoid	3	Male	85	285								0	12	8	8	0	1	1.66667	2.66667	5.83322	3.41132	0.965389	7.38367	18.7547	0.624383
178	Rhabdoid	3	Male	58	285								6.66667	12	8	10	6.66667	7.33333	8	8	4.41007	4.48346	1.60185	4.12238	14.5119	1.91928

## Sheet: Table S3
Table S3. The detailed information for 22 cases meningioma tissues used for RNAseq analysis
Samples	Sample ID	Type	Subtype	Grade
S1	22739	Tissue	Fibroblastic	1
S2	24928	Tissue	Transitional	1
S3	29799	Tissue	Fibroblastic	1
S4	32829	Tissue	Fibroblastic	1
S5	36755	Tissue	Fibroblastic	1
S6	53125	Tissue	Meinigothelial	1
S7	54760	Tissue	Fibroblastic	1
S8	55873	Tissue	Transitional	1
S9	7112-1	Tissue	Fibrous	1
S10	7534	Tissue	Fibrous	1
S11	88383	Tissue	Fibroblastic	1
S12	9261	Tissue	Fibroblastic	1
S13	MG1-11R	Tissue	Fibroblastic	1
S14	MG1-3R	Tissue	Fibroblastic	1
S15	MG1-6R	Tissue	Fibroblastic	1
S16	MG1-7R	Tissue	Fibroblastic	1
S17	MG1-8R	Tissue	Fibroblastic	1
S18	MG1-9R	Tissue	Fibroblastic	1
S19	MG7	Tissue	Meningothelial	1
S20	MG8	Tissue	Meningothelial	1
S21	MG1	Tissue	Atypical	2
S22	MG5	Tissue	Atypical	2

## Sheet: Table S4
Table S4. Clinicopathological characteristics of meningioma PDCLs
Cell lines	Sourse	Gender	Age	Location	Pathology subtype	Grade
MG1	BWH	M	71	Frontal, Right	Atypical meningioma	II
MG2	BWH	F	34	Frontal, Right	Atypical meningioma	II
MG5	BWH	F	55	Parietal, Left	Atypical meningioma	II
MG6	CHTN	F	38	Parietal, Left	Papillary	III
MG7	BWH	F	72	Parieto-Occipital, Right	Meningothelial meningioma	I
MG8	BWH	M	68	Olfactory groove	Meningothelial meningioma	I
MG 9	CHTN	F	56	Skull base, Left	n/a	I
MG 10	CHTN	M	39	n/a	n/a	I
MG 11	BWH	M	70	Frontal, Left	Meningothelial meningioma	I
MG 12	BWH	F	64		meningioma	I
MG 13	BWH	F	68	Occipital, Left	Fibroblastic meningioma	I, elevated MIB1
MG 14	BWH	M	60	Temporal, Right	Meningioma with atypical features	I, atypical features
MG 15	BWH	F	52	Frontal	Meningothelial meningioma	I
BWH: Brigham and Women's Hospital
CHTN: Cooperative Human Tissue Network
n/ a: Not available

## Sheet: Table S5
Table S5. Gene-gene correlation data from Celsius analyzed by UGET
Alignments				chr14:60182505-60185933 (-) // 99.78 // q23.1	chr14:60181174-60182336 (-) // 96.26 // q23.1	chr6:1555679-1557418 (+) // 86.0 // p25.3	chr6:1555249-1559126 (+) // 85.68 // p25.3	chr16:85158400-85159974 (+) // 90.95 // q24.1	chr5:72777870-72780356 (-) // 73.66 // q13.2	chr5:72777854-72778658 (+) // 97.89 // q13.2	chr9:16408565-16426115 (-) // 91.83 // p22.3	chr9:16399501-16400473 (-) // 77.44 // p22.3	chr9:16404931-16405669 (-) // 100.0 // p22.3	chr9:16406403-16407072 (-) // 96.23 // p22.3	chr9:16403198-16404303 (-) // 98.83 // p22.3	chr9:16569789-16717880 (-) // 95.96 // p22.3	chr13:72530930-72549676 (+) // 96.24 // q22.1	chr13:72531264-72548071 (+) // 95.62 // q22.1	chr7:15617363-15692819 (-) // 92.7 // p21.1		chr1:65867047-65868643 (+) // 39.07 // p31.3	chr1:65658922-65875394 (+) // 99.74 // p31.3	chr1:65803836-65873698 (+) // 99.6 // p31.3	chr1:65764012-65864505 (+) // 99.62 // p31.3	chr1:65764012-65871530 (+) // 99.79 // p31.3	chr1:65658922-65871531 (+) // 99.66 // p31.3	chr14:51804926-51811491 (+) // 100.0 // q22.1	chr14:51804926-51811491 (-) // 100.0 // q22.1	chr14:51811724-51813191 (+) // 98.19 // q22.1	chr1:153425164-153429304 (-) // 91.28 // q22	chr1:153425222-153429282 (-) // 99.63 // q22	chr1:153424925-153425270 (-) // 92.74 // q22
				SIX homeobox 1	SIX homeobox 1	forkhead box C1	forkhead box C1	forkhead box C2 (MFH-1, mesenchyme forkhead 1)	forkhead box D1	Forkhead box D1	basonuclin 2	basonuclin 2	basonuclin 2	basonuclin 2	basonuclin 2	basonuclin 2	Kruppel-like factor 5 (intestinal)	Kruppel-like factor 5 (intestinal)	mesenchyme homeobox 2		leptin receptor	leptin receptor	leptin receptor	leptin receptor	leptin receptor	leptin receptor	prostaglandin D2 receptor (DP)	prostaglandin D2 receptor (DP)	prostaglandin D2 receptor (DP)	mucin 1, cell surface associated	mucin 1, cell surface associated	mucin 1, cell surface associated
	Gene Title	Gene Symbol		SIX1	SIX1	FOXC1	FOXC1	FOXC2	FOXD1	FOXD1	BNC2	BNC2	BNC2	BNC2	BNC2	BNC2	KLF5	KLF5	MEOX2		LEPR	LEPR	LEPR	LEPR	LEPR	LEPR	PTGDR	PTGDR	PTGDR	MUC1	MUC1	MUC1
			Probe.Set.ID	205817_at	228347_at	1553613_s_at	213260_at	214520_at	206307_s_at	213972_at	220272_at	229942_at	230722_at	235723_at	238478_at	243445_at	209211_at	209212_s_at	206201_s_at	AVG TF	1556919_at	207255_at	209894_at	211354_s_at	211355_x_at	211356_x_at	215894_at	215937_at	234165_at	207847_s_at	211695_x_at	213693_s_at
chr9:16404931-16405669 (-) // 100.0 // p22.3	basonuclin 2	BNC2	230722_at	0.4875	0.4323	0.3353	0.5543	0.4344	0.3983	0.0294	0.8977	0.891	1	0.8586	0.9794	0.6266	0.1634	0.1305	0.4156	0.539644	0.4475	0.5211	0.6217	0.4595	0.4644	0.4652	0.5474	0.1452	0.5395	-0.0047	0.0004	0.0122
chr9:16399501-16400473 (-) // 77.44 // p22.3	basonuclin 2	BNC2	229942_at	0.4583	0.4457	0.3216	0.5715	0.4481	0.4068	0.0448	0.8448	1	0.891	0.8799	0.9103	0.6517	0.1623	0.117	0.3836	0.533587	0.5037	0.5219	0.6223	0.4475	0.4556	0.4555	0.5352	0.1577	0.5359	-0.0168	-0.0068	-0.0085
chr9:16403198-16404303 (-) // 98.83 // p22.3	basonuclin 2	BNC2	238478_at	0.4624	0.4173	0.3087	0.5518	0.4168	0.3894	0.0219	0.9036	0.9103	0.9794	0.8508	1	0.6317	0.1615	0.1219	0.4017	0.533075	0.4761	0.5117	0.6186	0.4265	0.4332	0.4343	0.5412	0.1417	0.5242	0.0003	0.0065	0.0175
chr9:16406403-16407072 (-) // 96.23 // p22.3	basonuclin 2	BNC2	235723_at	0.4563	0.4401	0.3221	0.5595	0.4705	0.4441	0.0593	0.8097	0.8799	0.8586	1	0.8508	0.6635	0.1763	0.126	0.3806	0.531081	0.4472	0.5131	0.6004	0.4594	0.4652	0.4673	0.5271	0.1486	0.5673	-0.0345	-0.0253	-0.0334
chr9:16408565-16426115 (-) // 91.83 // p22.3	basonuclin 2	BNC2	220272_at	0.4337	0.3888	0.3522	0.5097	0.43	0.3712	0.0345	1	0.8448	0.8977	0.8097	0.9036	0.6853	0.126	0.1358	0.3827	0.519106	0.416	0.4957	0.5716	0.4418	0.4501	0.4496	0.5184	0.1386	0.5037	-0.0247	-0.0163	-0.0185
chr9:94186069-94206736 (-) // 98.61 // q22.31	osteoglycin	OGN	222722_at	0.5473	0.5084	0.4992	0.6575	0.588	0.4155	0.0255	0.6954	0.6626	0.7073	0.656	0.6957	0.4867	0.2013	0.1957	0.5417	0.505238	0.4456	0.5396	0.7422	0.5666	0.577	0.5779	0.6539	0.1978	0.6373	-0.0271	-0.0211	-0.0206
chr6:1555249-1559126 (+) // 85.68 // p25.3	forkhead box C1	FOXC1	213260_at	0.5857	0.5948	0.7205	1	0.5333	0.4596	0.1275	0.5097	0.5715	0.5543	0.5595	0.5518	0.4343	0.241	0.2164	0.4087	0.504287	0.4352	0.5208	0.6367	0.5136	0.5199	0.5219	0.5775	0.1604	0.5719	-0.0118	-0.0052	-0.0147
chr9:94186708-94205578 (-) // 99.2 // q22.31	osteoglycin	OGN	218730_s_at	0.5686	0.5127	0.515	0.6559	0.6233	0.4377	0.0586	0.6477	0.6203	0.6795	0.6325	0.6527	0.4856	0.2047	0.2134	0.5413	0.503094	0.3994	0.5325	0.7269	0.6146	0.6204	0.6224	0.6712	0.2138	0.6612	-0.0294	-0.0246	-0.0265
chr4:185246854-185248714 (-) // 81.37 // q35.1	ectonucleotide pyrophosphatase/phosphodiesterase 6	ENPP6	229916_at	0.591	0.5505	0.457	0.6912	0.5854	0.4467	0.0633	0.5924	0.6472	0.6511	0.6754	0.6455	0.4542	0.2151	0.1817	0.4697	0.494838	0.5924	0.7019	0.8172	0.681	0.6857	0.6865	0.707	0.222	0.7029	-0.0305	-0.0239	-0.029
chr21:25933802-26008963 (+) // 95.71 // q21.3	junctional adhesion molecule 2	JAM2	219213_at	0.5367	0.4994	0.4533	0.6229	0.5572	0.4588	0.0673	0.6094	0.6407	0.6486	0.6585	0.6327	0.4449	0.1802	0.1809	0.5295	0.482563	0.4324	0.5336	0.675	0.4987	0.5036	0.508	0.7083	0.2089	0.7159	-0.0594	-0.0522	-0.0595
chr10:78314643-79067297 (-) // 96.43 // q22.3	potassium large conductance calcium-activated channel, subfamily M, alpha member 1	KCNMA1	221584_s_at	0.5578	0.5295	0.4485	0.6054	0.4971	0.4202	0.0878	0.6834	0.6852	0.6769	0.6628	0.68	0.4693	0.1669	0.147	0.3723	0.480631	0.5275	0.6276	0.6889	0.588	0.5981	0.5966	0.5899	0.1676	0.5866	-0.0301	-0.0226	-0.0198
chr21:26010315-26011862 (+) // 74.86 // q21.3	junctional adhesion molecule 2	JAM2	229127_at	0.5359	0.5026	0.4501	0.624	0.5417	0.4583	0.037	0.5967	0.6305	0.6403	0.6657	0.6188	0.4279	0.1986	0.1832	0.5429	0.478388	0.4277	0.5305	0.678	0.4856	0.492	0.4955	0.6978	0.2046	0.7154	-0.0594	-0.0517	-0.0602
chr16:85160153-85160729 (+) // 96.53 // q24.1	Transcribed locus	---	239058_at	0.506	0.4976	0.4713	0.6323	0.8337	0.5245	0.1179	0.5275	0.5779	0.5423	0.6072	0.5429	0.4798	0.1802	0.1626	0.4234	0.476694	0.4466	0.4923	0.6197	0.4873	0.497	0.5005	0.5548	0.1632	0.5725	-0.0556	-0.0436	-0.0598
chr9:16530177-16532548 (-) // 96.28 // p22.3	CDNA FLJ10237 fis, clone HEMBB1000438	---	233036_at	0.3977	0.3495	0.3095	0.461	0.3834	0.2968	-0.0216	0.901	0.8175	0.8638	0.7566	0.8639	0.6339	0.1267	0.1211	0.3628	0.476475	0.4256	0.4492	0.5273	0.3572	0.3617	0.3624	0.4901	0.1254	0.4712	-0.0022	0.0072	0.0122
chr15:69739922-69860040 (+) // 91.0 // q23	thrombospondin, type I, domain containing 4	THSD4	222835_at	0.5505	0.5095	0.5088	0.6422	0.5784	0.4024	0.0781	0.5905	0.6051	0.6039	0.5786	0.6015	0.4571	0.2386	0.2363	0.4199	0.475087	0.5319	0.6389	0.7441	0.658	0.664	0.6646	0.6055	0.1768	0.5651	0.0738	0.0765	0.091
chr9:16516491-16517732 (-) // 74.09 // p22.3	hypothetical protein MGC24103	MGC24103	232568_at	0.4017	0.3523	0.2946	0.4741	0.3556	0.2993	-0.0078	0.8703	0.7942	0.8403	0.7479	0.8463	0.6089	0.1286	0.1104	0.3693	0.467875	0.4098	0.4415	0.5455	0.3471	0.3504	0.3521	0.523	0.1517	0.4944	-0.0109	-0.0056	0.0074
chr14:60182505-60185933 (-) // 99.78 // q23.1	SIX homeobox 1	SIX1	205817_at	1	0.8868	0.4581	0.5857	0.4957	0.3863	0.1147	0.4337	0.4583	0.4875	0.4563	0.4624	0.3637	0.1614	0.1735	0.5174	0.465094	0.3711	0.5016	0.5434	0.4885	0.4924	0.4923	0.5433	0.1562	0.5192	0.0332	0.0337	0.0363
chr14:51822926-51824428 (+) // 67.9 // q22.1	CDNA: FLJ20931 fis, clone ADSE01282	---	216050_at	0.5545	0.507	0.3989	0.6166	0.5169	0.4191	0.0588	0.5417	0.6358	0.6109	0.6096	0.6156	0.445	0.2185	0.1808	0.4091	0.458675	0.5684	0.5931	0.6843	0.4863	0.4926	0.4938	0.8678	0.2878	0.8465	-0.0281	-0.0223	-0.0256
chr1:65803836-65873698 (+) // 99.6 // p31.3	leptin receptor	LEPR	209894_at	0.5434	0.537	0.4281	0.6367	0.5066	0.3926	0.0305	0.5716	0.6223	0.6217	0.6004	0.6186	0.397	0.1801	0.1439	0.4907	0.457575	0.6595	0.7989	1	0.7894	0.7961	0.7992	0.6056	0.1858	0.5913	-0.0472	-0.0429	-0.0422
chr4:104166095-104166805 (-) // 91.8 // q24	Na+/H+ exchanger domain containing 2	NHEDC2	229491_at	0.5591	0.4945	0.437	0.6206	0.5995	0.4243	0.0589	0.5206	0.5726	0.5728	0.6159	0.558	0.4144	0.1933	0.1809	0.4409	0.453956	0.4697	0.5979	0.674	0.5598	0.5654	0.5701	0.7445	0.3107	0.7708	-0.0689	-0.0626	-0.0754
chr15:69861708-69862776 (+) // 100.0 // q23	thrombospondin, type I, domain containing 4	THSD4	226506_at	0.5052	0.4828	0.3853	0.6311	0.545	0.3943	0.0415	0.5491	0.6373	0.6023	0.6255	0.6108	0.4151	0.2269	0.1878	0.3928	0.45205	0.6121	0.6159	0.7464	0.595	0.6022	0.6047	0.5199	0.1379	0.5211	0.0705	0.0743	0.0741
chr8:27783317-27783703 (-) // 89.63 // p21.1	Scavenger receptor class A, member 5 (putative)	SCARA5	229839_at	0.5547	0.5291	0.4713	0.57	0.5392	0.3554	0.0465	0.5457	0.5483	0.5826	0.5302	0.5561	0.4018	0.2022	0.2104	0.5466	0.449381	0.4528	0.6048	0.7417	0.6569	0.6625	0.6612	0.6245	0.1993	0.5996	-0.0458	-0.0443	-0.0424
chr20:36322020-36350763 (+) // 47.66 // q11.23	bactericidal/permeability-increasing protein /// hypothetical protein LOC149684	BPI /// LOC149684	244231_at	0.4815	0.4618	0.4427	0.6152	0.5556	0.4002	0.0984	0.5163	0.6061	0.5834	0.609	0.5791	0.4304	0.2104	0.1874	0.4013	0.448675	0.407	0.4146	0.5549	0.4207	0.4253	0.4273	0.5674	0.1769	0.5618	-0.0233	-0.0139	-0.0236
chr14:60181174-60182336 (-) // 96.26 // q23.1	SIX homeobox 1	SIX1	228347_at	0.8868	1	0.4798	0.5948	0.4458	0.3766	0.1203	0.3888	0.4457	0.4323	0.4401	0.4173	0.3118	0.1485	0.1375	0.5312	0.447331	0.3523	0.4472	0.537	0.4347	0.4415	0.4407	0.4618	0.1322	0.4546	0.0105	0.0131	0.0074
chr8:27783559-27784198 (-) // 89.69 // p21.1	scavenger receptor class A, member 5 (putative)	SCARA5	235849_at	0.5292	0.5172	0.4348	0.5767	0.5337	0.3456	0.0239	0.5482	0.5815	0.5937	0.5644	0.5754	0.3795	0.2076	0.2123	0.527	0.446919	0.5176	0.5985	0.7399	0.5969	0.6066	0.6057	0.5872	0.1739	0.5796	-0.0405	-0.0336	-0.0361
chr15:82383674-82499594 (+) // 95.87 // q25.2	ADAMTS-like 3	ADAMTSL3	213974_at	0.5395	0.4999	0.4368	0.6332	0.5234	0.3843	0.0467	0.5429	0.5758	0.5887	0.6141	0.5779	0.4244	0.1766	0.149	0.4051	0.444894	0.5349	0.6187	0.7564	0.6509	0.657	0.659	0.5804	0.1784	0.5876	-0.0186	-0.0136	-0.0159
chr1:47674275-47678514 (+) // 82.55 // p33	forkhead box D2	FOXD2	207653_at	0.4923	0.4496	0.4447	0.5971	0.6073	0.3947	0.1424	0.4848	0.5442	0.5146	0.5574	0.5038	0.4519	0.2986	0.286	0.3444	0.444612	0.4362	0.5589	0.6087	0.5877	0.5905	0.5983	0.6227	0.2078	0.6427	-0.0039	0.0003	-0.005
chr6:55726401-55848347 (-) // 98.09 // p12.1	bone morphogenetic protein 5	BMP5	205430_at	0.4991	0.4635	0.4221	0.6179	0.5021	0.4398	0.0669	0.4876	0.5418	0.5475	0.5632	0.5419	0.3936	0.2457	0.2124	0.4886	0.439606	0.3497	0.4309	0.6139	0.4141	0.4223	0.4248	0.6817	0.2068	0.6943	-0.027	-0.0199	-0.0251
chr9:16569789-16717880 (-) // 95.96 // p22.3	basonuclin 2	BNC2	243445_at	0.3637	0.3118	0.3181	0.4343	0.4243	0.3655	0.0832	0.6853	0.6517	0.6266	0.6635	0.6317	1	0.096	0.1122	0.2491	0.438563	0.2738	0.3529	0.397	0.361	0.3646	0.3666	0.4486	0.1208	0.4278	-0.0395	-0.0234	-0.0425
chr5:127021751-127022225 (+) // 91.84 // q23.2	cortexin 3	CTXN3	231391_at	0.5435	0.4974	0.3987	0.5559	0.5104	0.3814	0.0708	0.529	0.5617	0.5824	0.5765	0.5681	0.3923	0.1965	0.1821	0.4206	0.435456	0.4467	0.6055	0.678	0.5868	0.5935	0.5904	0.6394	0.2034	0.6299	-0.0339	-0.031	-0.0325
chr16:85158400-85159974 (+) // 90.95 // q24.1	forkhead box C2 (MFH-1, mesenchyme forkhead 1)	FOXC2	214520_at	0.4957	0.4458	0.4889	0.5333	1	0.4358	0.2471	0.43	0.4481	0.4344	0.4705	0.4168	0.4243	0.1355	0.1741	0.3642	0.434031	0.3342	0.4357	0.5066	0.4816	0.483	0.4863	0.5071	0.1473	0.5068	-0.0516	-0.0427	-0.0521
chr14:51804926-51811491 (+) // 100.0 // q22.1	prostaglandin D2 receptor (DP)	PTGDR	215894_at	0.5433	0.4618	0.4381	0.5775	0.5071	0.3968	0.0716	0.5184	0.5352	0.5474	0.5271	0.5412	0.4486	0.2146	0.2083	0.3938	0.433175	0.3856	0.4951	0.6056	0.4724	0.4799	0.4815	1	0.363	0.9016	-0.0407	-0.0407	-0.0376
chr17:19377758-19422938 (+) // 75.3 // p11.2	solute carrier family 47, member 1	SLC47A1	219525_at	0.514	0.4762	0.4036	0.6096	0.5721	0.3664	0.0622	0.505	0.563	0.5626	0.579	0.5614	0.4019	0.1796	0.1511	0.4146	0.432644	0.4758	0.552	0.6654	0.5137	0.518	0.5221	0.6279	0.1857	0.6247	-0.034	-0.0278	-0.0273
chr10:95658671-95659167 (+) // 55.44 // q23.33	transmembrane protein 20	TMEM20	231012_at	0.5713	0.5409	0.4609	0.5707	0.5414	0.3813	0.0079	0.5066	0.5439	0.5185	0.5137	0.5053	0.4667	0.1582	0.1727	0.4287	0.430544	0.4482	0.5513	0.6322	0.5462	0.5554	0.5581	0.6847	0.2049	0.6515	-0.0764	-0.0592	-0.0885
chr20:13096889-13097749 (+) // 79.28 // p12.1	Transcribed locus	---	236201_at	0.5059	0.4611	0.4491	0.567	0.5842	0.3963	0.0781	0.4663	0.4886	0.517	0.5172	0.4921	0.3857	0.2507	0.244	0.459	0.428894	0.3537	0.4572	0.5683	0.4506	0.4538	0.4593	0.6329	0.206	0.6693	-0.0199	-0.0143	-0.0158
chr14:51811724-51813191 (+) // 98.19 // q22.1	prostaglandin D2 receptor (DP)	PTGDR	234165_at	0.5192	0.4546	0.4146	0.5719	0.5068	0.4069	0.0708	0.5037	0.5359	0.5395	0.5673	0.5242	0.4278	0.2179	0.2045	0.3754	0.427563	0.4195	0.4946	0.5913	0.4762	0.4849	0.4871	0.9016	0.4372	1	-0.0307	-0.0276	-0.0288
chr5:127016639-127021758 (+) // 98.71 // q23.2	cortexin 3	CTXN3	236374_at	0.5204	0.4758	0.3788	0.5412	0.5241	0.3831	0.0783	0.4955	0.5641	0.559	0.6117	0.531	0.405	0.1909	0.1787	0.3962	0.427113	0.4196	0.5996	0.6448	0.6409	0.646	0.6434	0.5684	0.1852	0.6194	-0.0279	-0.0216	-0.0292
chr5:122557381-122557858 (+) // 97.35 // q23.2	Transcribed locus	---	236577_at	0.4983	0.4811	0.4352	0.593	0.4815	0.3728	0.0621	0.5333	0.5525	0.584	0.5302	0.5755	0.3748	0.1588	0.1359	0.3934	0.42265	0.4692	0.5941	0.715	0.6037	0.6042	0.6045	0.524	0.1494	0.4785	-0.0196	-0.0157	-0.0128
chr11:133523738-133527106 (+) // 98.82 // q25	junctional adhesion molecule 3 /// hypothetical protein LOC100133502	JAM3 /// LOC100133502	212813_at	0.4499	0.4363	0.4034	0.577	0.4909	0.4297	0.0259	0.5562	0.5846	0.5839	0.5852	0.5876	0.3935	0.0922	0.0746	0.4766	0.421719	0.4043	0.4497	0.6173	0.4377	0.4422	0.4448	0.5539	0.2044	0.5643	-0.1093	-0.1033	-0.1124
chr5:122452711-122551595 (+) // 91.66 // q23.2	PR domain containing 6	PRDM6	230311_s_at	0.4743	0.456	0.4213	0.6107	0.4681	0.3712	0.0381	0.5463	0.5691	0.5793	0.5426	0.5853	0.404	0.155	0.1364	0.3762	0.420869	0.4977	0.5767	0.69	0.5637	0.5699	0.5714	0.4949	0.1172	0.464	0.0099	0.02	0.0215
chr12:10114348-10142869 (-) // 99.61 // p13.2	C-type lectin domain family 1, member A	CLEC1A	219761_at	0.4532	0.4497	0.3724	0.544	0.5272	0.3442	-0.0167	0.5315	0.5871	0.5573	0.5887	0.5538	0.4386	0.1735	0.1603	0.4638	0.420538	0.5273	0.5723	0.6625	0.5067	0.5178	0.5196	0.5436	0.1611	0.5518	-0.0529	-0.0375	-0.0644
chr5:148692447-148700958 (+) // 98.95 // q33.1	actin filament associated protein 1-like 1	AFAP1L1	226955_at	0.5233	0.5309	0.33	0.5054	0.4748	0.3707	0.0555	0.5033	0.5686	0.5435	0.5665	0.5339	0.4337	0.1762	0.1559	0.4488	0.420063	0.4335	0.5188	0.6073	0.47	0.4778	0.4797	0.5182	0.1396	0.5353	-0.066	-0.0569	-0.0774
chr4:104160837-104198548 (-) // 98.67 // q24	Na+/H+ exchanger domain containing 2	NHEDC2	1564746_at	0.5191	0.4417	0.4334	0.5512	0.6012	0.3993	0.1079	0.466	0.483	0.5034	0.5553	0.474	0.4154	0.1708	0.1927	0.4034	0.419863	0.3331	0.5099	0.5681	0.5631	0.5687	0.5737	0.6826	0.2337	0.7449	-0.057	-0.0496	-0.0628
chr20:13094012-13095413 (+) // 92.45 // p12.1	serine palmitoyltransferase, long chain base subunit 3	SPTLC3	227752_at	0.5034	0.4593	0.4267	0.5466	0.5623	0.3935	0.0848	0.4427	0.4676	0.4944	0.5134	0.4685	0.3756	0.2726	0.273	0.422	0.41915	0.3179	0.4285	0.5335	0.4532	0.4558	0.4615	0.6098	0.2048	0.6607	-0.0187	-0.0115	-0.0203
chr17:58058774-58124690 (+) // 94.3 // q23.2	mannose receptor, C type 2	MRC2	37408_at	0.4347	0.4342	0.3526	0.4781	0.426	0.498	0.1185	0.5833	0.5832	0.5931	0.5304	0.5987	0.3937	0.1132	0.1073	0.4178	0.416425	0.3485	0.3978	0.5636	0.4088	0.4152	0.4166	0.41	0.0782	0.4022	0.0002	0.0075	0.0245
chr11:7487511-7489181 (+) // 91.88 // p15.4	olfactomedin-like 1	OLFML1	217525_at	0.5221	0.519	0.388	0.5244	0.4047	0.3057	0.0081	0.5578	0.5457	0.5851	0.5261	0.5671	0.3468	0.1324	0.1231	0.5542	0.413144	0.4221	0.58	0.7265	0.6368	0.6431	0.6368	0.4492	0.1214	0.4216	-0.0285	-0.0268	-0.0206
chr20:12996961-12997398 (+) // 99.32 // p12.1	Transcribed locus	---	242559_at	0.4795	0.4255	0.2897	0.5698	0.4186	0.3523	0.0355	0.497	0.5398	0.5759	0.5352	0.5878	0.3754	0.2616	0.2058	0.4233	0.410794	0.4768	0.445	0.5708	0.3238	0.3268	0.3323	0.6466	0.1928	0.6383	0.0076	0.0153	0.0203
chr13:93856956-93857656 (+) // 83.91 // q32.1	Glypican 6	GPC6	227059_at	0.4886	0.488	0.4195	0.5339	0.435	0.3957	0.0533	0.508	0.5034	0.5631	0.5082	0.53	0.3673	0.1204	0.102	0.4536	0.404375	0.3374	0.4906	0.6293	0.5749	0.5745	0.5753	0.432	0.1122	0.4228	-0.0482	-0.0489	-0.0403
chr9:94216233-94226523 (-) // 99.56 // q22.31	osteomodulin	OMD	205907_s_at	0.4471	0.4193	0.4574	0.5509	0.5346	0.4006	0.0602	0.4672	0.4556	0.4876	0.5013	0.4616	0.3684	0.1739	0.1868	0.4802	0.403294	0.3086	0.4264	0.6275	0.5406	0.544	0.5461	0.5789	0.1821	0.5833	-0.0118	-0.0091	-0.0113
chr15:69807940-69858019 (+) // 93.22 // q23	thrombospondin, type I, domain containing 4	THSD4	219153_s_at	0.4924	0.4469	0.4713	0.5485	0.5504	0.3488	0.0815	0.4664	0.4828	0.4785	0.5096	0.4534	0.4084	0.1738	0.1875	0.3488	0.403063	0.4342	0.6454	0.6626	0.7928	0.791	0.7907	0.493	0.1559	0.4787	0.0269	0.0312	0.0251
chr9:94216358-94226381 (-) // 99.47 // q22.31	osteomodulin	OMD	205908_s_at	0.4467	0.4048	0.4792	0.5307	0.5425	0.3935	0.0784	0.4632	0.4207	0.4726	0.4533	0.444	0.3751	0.1735	0.2011	0.4834	0.397669	0.2707	0.4023	0.5962	0.5296	0.5303	0.5343	0.5885	0.1897	0.5781	-0.0179	-0.0164	-0.0164
chr3:71668431-71669212 (-) // 98.86 // p14.1	Transcribed locus	---	240666_at	0.4739	0.4084	0.3216	0.543	0.4538	0.3069	-0.0179	0.5148	0.5815	0.5894	0.5543	0.5963	0.3727	0.1797	0.1528	0.3249	0.397256	0.5297	0.5296	0.5921	0.3703	0.3779	0.3771	0.5799	0.1417	0.5593	0.0755	0.0777	0.0918
chr4:96302683-96305471 (-) // 99.36 // q22.3	CDNA FLJ12425 fis, clone MAMMA1003104	---	227838_at	0.4682	0.4216	0.3643	0.5495	0.4866	0.3512	0.0449	0.4651	0.519	0.5447	0.5411	0.5231	0.3488	0.1498	0.1308	0.4359	0.396538	0.3652	0.4248	0.5415	0.4126	0.414	0.4181	0.5186	0.1418	0.5307	-0.0617	-0.054	-0.0625
chr13:92677095-93853813 (+) // 99.21 // q31.3	glypican 6	GPC6	223730_at	0.4899	0.4304	0.4374	0.5197	0.4558	0.3724	0.0924	0.5346	0.4686	0.535	0.4421	0.5112	0.4346	0.1075	0.1318	0.3692	0.395787	0.304	0.5083	0.5827	0.5972	0.5966	0.597	0.4673	0.1315	0.4186	-0.0354	-0.0347	-0.0286
chr14:54240738-54242748 (+) // 76.89 // q22.2	CDNA FLJ12055 fis, clone HEMBB1002049	---	214967_at	0.4882	0.4616	0.3006	0.5302	0.3521	0.3439	0.0467	0.5385	0.5588	0.5693	0.5392	0.5756	0.359	0.1665	0.1302	0.3648	0.395325	0.5849	0.562	0.6248	0.3951	0.3973	0.3985	0.5654	0.1902	0.5786	-0.034	-0.0263	-0.0258
chr1:202454601-202455053 (-) // 76.73 // q32.1	pleckstrin homology domain containing, family A member 6	PLEKHA6	229245_at	0.4757	0.4435	0.3896	0.5495	0.4377	0.3218	-0.01	0.454	0.5278	0.5244	0.5335	0.5164	0.3401	0.2573	0.202	0.3208	0.392756	0.5018	0.5653	0.6272	0.495	0.5032	0.5003	0.5515	0.1482	0.5711	0.0257	0.0241	0.041
chr5:148631625-148672130 (+) // 88.16 // q33.1	actin filament associated protein 1-like 1	AFAP1L1	1555542_at	0.4839	0.4115	0.3556	0.4448	0.5075	0.3711	0.2224	0.4514	0.461	0.4606	0.4913	0.4342	0.5073	0.1715	0.1941	0.3093	0.392344	0.3234	0.4847	0.4744	0.4993	0.4995	0.5012	0.5161	0.1527	0.536	-0.0843	-0.065	-0.0928
chr4:87734908-87955326 (+) // 99.81 // q21.3	protein tyrosine phosphatase, non-receptor type 13 (APO-1/CD95 (Fas)-associated phosphatase)	PTPN13	204201_s_at	0.4746	0.4552	0.3524	0.5073	0.3415	0.4108	0.0455	0.4476	0.4729	0.4901	0.5002	0.4744	0.3296	0.2972	0.2598	0.3771	0.389763	0.3643	0.4658	0.5535	0.4457	0.4519	0.4518	0.4727	0.1232	0.4708	-0.0158	-0.0137	-0.0101
chr5:72777870-72780356 (-) // 73.66 // q13.2	forkhead box D1	FOXD1	206307_s_at	0.3863	0.3766	0.3106	0.4596	0.4358	1	0.3265	0.3712	0.4068	0.3983	0.4441	0.3894	0.3655	0.1398	0.1199	0.2733	0.387731	0.2517	0.317	0.3926	0.3227	0.3247	0.3282	0.3968	0.1057	0.4069	-0.0676	-0.0602	-0.0801
chr6:55728210-55848321 (-) // 99.49 // p12.1	bone morphogenetic protein 5	BMP5	205431_s_at	0.4485	0.3995	0.3755	0.5211	0.465	0.4151	0.0812	0.4107	0.4523	0.4684	0.4888	0.4484	0.3663	0.2175	0.207	0.4156	0.386306	0.2631	0.3577	0.4969	0.405	0.4115	0.4145	0.5785	0.1794	0.6063	-0.0232	-0.0164	-0.0213
chr6:1555679-1557418 (+) // 86.0 // p25.3	forkhead box C1	FOXC1	1553613_s_at	0.4581	0.4798	1	0.7205	0.4889	0.3106	0.0906	0.3522	0.3216	0.3353	0.3221	0.3087	0.3181	0.1553	0.213	0.3056	0.386275	0.2161	0.3674	0.4281	0.4333	0.436	0.4356	0.4381	0.1303	0.4146	-0.025	-0.0226	-0.0293
chr9:126614844-126616982 (+) // 49.72 // q33.3	olfactomedin-like 2A	OLFML2A	213075_at	0.4059	0.3941	0.3415	0.5128	0.4261	0.3215	0.0158	0.5067	0.5204	0.5177	0.4947	0.5204	0.3502	0.2175	0.2044	0.4293	0.386188	0.3766	0.3829	0.5422	0.3703	0.3784	0.3815	0.428	0.1071	0.4325	0.0011	0.0092	-0.0057
chr3:114417765-114488452 (+) // 98.92 // q13.2	Boc homolog (mouse)	BOC	224184_s_at	0.4321	0.3959	0.3364	0.4887	0.3236	0.263	-0.0114	0.603	0.566	0.6062	0.5005	0.6163	0.3668	0.1277	0.1321	0.4021	0.384313	0.3994	0.4803	0.6167	0.4794	0.4863	0.4829	0.3982	0.092	0.3661	0.0357	0.0417	0.0533
chr1:65658922-65875394 (+) // 99.74 // p31.3	leptin receptor	LEPR	207255_at	0.5016	0.4472	0.3674	0.5208	0.4357	0.317	0.0405	0.4957	0.5219	0.5211	0.5131	0.5117	0.3529	0.1458	0.1427	0.3052	0.383769	0.7786	1	0.7989	0.7949	0.7983	0.7988	0.4951	0.1436	0.4946	-0.0359	-0.0291	-0.0364
chr1:221242921-221245958 (+) // 98.83 // q41	dispatched homolog 1 (Drosophila)	DISP1	228184_at	0.4202	0.3828	0.3679	0.5319	0.4329	0.3489	0.0397	0.5027	0.4703	0.5545	0.505	0.534	0.335	0.1392	0.132	0.4417	0.383669	0.2767	0.3515	0.5195	0.3658	0.3679	0.3702	0.527	0.1598	0.5128	-0.0011	0.0035	0.0117
chr15:69812401-69814123 (+) // 38.04 // q23	CDNA FLJ14070 fis, clone HEMBB1001619	---	232944_at	0.4573	0.4052	0.3742	0.5138	0.476	0.3003	0.0273	0.4926	0.5115	0.5235	0.4759	0.527	0.3577	0.1664	0.1579	0.3476	0.382138	0.534	0.5698	0.6235	0.487	0.4832	0.4869	0.4921	0.1318	0.4525	0.0971	0.0998	0.1159
chr12:102906891-102968051 (-) // 98.74 // q23.3	glycosyltransferase 8 domain containing 2	GLT8D2	227070_at	0.4668	0.4688	0.3193	0.4113	0.3542	0.3757	0.0488	0.5179	0.5026	0.5472	0.501	0.5346	0.3359	0.108	0.0907	0.5296	0.382025	0.2404	0.3194	0.4753	0.3585	0.3608	0.3635	0.3478	0.0858	0.3426	0.0182	0.0152	0.0356
---	CDNA clone IMAGE:3885734	---	1561064_a_at	0.4775	0.4265	0.3914	0.4749	0.5284	0.3653	0.1463	0.4464	0.4561	0.463	0.4809	0.4394	0.3686	0.1536	0.1666	0.2994	0.380269	0.4607	0.5493	0.5323	0.5217	0.5229	0.5266	0.5315	0.1724	0.5397	-0.04	-0.0332	-0.0423
chr10:5478571-5490531 (+) // 98.4 // p15.1	neuroepithelial cell transforming gene 1	NET1	201829_at	0.3979	0.4032	0.3482	0.4901	0.3045	0.2856	0.0238	0.4157	0.4533	0.4436	0.4366	0.4445	0.2699	0.5445	0.4593	0.3137	0.37715	0.3465	0.3801	0.5116	0.3589	0.3631	0.3645	0.4268	0.1266	0.4324	0.1929	0.1835	0.2225
chr3:114481431-114489000 (+) // 95.5 // q13.2	Boc homolog (mouse)	BOC	225990_at	0.4348	0.4326	0.3602	0.4823	0.3043	0.2585	-0.0049	0.5571	0.5493	0.5824	0.488	0.5912	0.3124	0.1142	0.0978	0.4547	0.375931	0.3907	0.4671	0.622	0.4683	0.4729	0.4688	0.3716	0.1044	0.3507	0.0128	0.0169	0.0364
chr1:65658922-65871531 (+) // 99.66 // p31.3	leptin receptor	LEPR	211356_x_at	0.4923	0.4407	0.4356	0.5219	0.4863	0.3282	0.0754	0.4496	0.4555	0.4652	0.4673	0.4343	0.3666	0.1244	0.1405	0.3257	0.375594	0.4876	0.7988	0.7992	0.9944	0.9976	1	0.4815	0.1552	0.4871	-0.0396	-0.0366	-0.0426
chr14:54318864-54319646 (+) // 96.88 // q22.2	CDNA FLJ26187 fis, clone ADG04782	---	235756_at	0.4457	0.4101	0.2511	0.4739	0.342	0.3317	0.0113	0.5306	0.5796	0.5691	0.5449	0.5851	0.3296	0.1464	0.1148	0.3332	0.374944	0.6988	0.6098	0.5966	0.3724	0.3765	0.377	0.4989	0.1236	0.5311	-0.0247	-0.0135	-0.0213
chr1:65764012-65871530 (+) // 99.79 // p31.3	leptin receptor	LEPR	211355_x_at	0.4924	0.4415	0.436	0.5199	0.483	0.3247	0.0732	0.4501	0.4556	0.4644	0.4652	0.4332	0.3646	0.1238	0.1398	0.3254	0.37455	0.4854	0.7983	0.7961	0.9938	1	0.9976	0.4799	0.1545	0.4849	-0.0393	-0.0362	-0.0424
chr4:107110942-107112277 (+) // 70.26 // q24	nephronectin	NPNT	225911_at	0.4467	0.4045	0.3481	0.5114	0.3892	0.306	-0.0047	0.4606	0.476	0.5075	0.4852	0.4902	0.319	0.2464	0.215	0.3868	0.374244	0.3143	0.4517	0.5778	0.5017	0.5077	0.5036	0.4807	0.1397	0.4772	0.0987	0.0962	0.1207
chr3:71395759-71396111 (-) // 60.99 // p14.1	Full length insert cDNA clone YB22D01	---	1561166_a_at	0.4277	0.3878	0.2712	0.5259	0.3814	0.2972	-0.014	0.4824	0.5427	0.5572	0.5449	0.5748	0.3438	0.1642	0.1105	0.3528	0.371906	0.4915	0.4777	0.5902	0.3162	0.3189	0.3211	0.6141	0.2045	0.546	-0.0121	-0.0085	-0.0024
chr1:65764012-65864505 (+) // 99.62 // p31.3	leptin receptor	LEPR	211354_s_at	0.4885	0.4347	0.4333	0.5136	0.4816	0.3227	0.0786	0.4418	0.4475	0.4595	0.4594	0.4265	0.361	0.1214	0.138	0.3224	0.370656	0.4767	0.7949	0.7894	1	0.9938	0.9944	0.4724	0.1526	0.4762	-0.0404	-0.038	-0.0432
chr10:95659103-95659578 (+) // 91.9 // q23.33	transmembrane protein 20	TMEM20	239265_at	0.5178	0.5374	0.3726	0.4828	0.4186	0.3412	0.0816	0.3994	0.4496	0.4495	0.4557	0.426	0.3133	0.1242	0.1045	0.4395	0.369606	0.3492	0.4591	0.5548	0.4558	0.4601	0.4622	0.5775	0.3198	0.586	-0.0948	-0.0918	-0.0969
chr3:73624825-73626607 (-) // 67.0 // p13	CDNA FLJ11646 fis, clone HEMBA1004394	---	232776_at	0.3982	0.3563	0.2767	0.4327	0.3517	0.2581	-0.0418	0.6042	0.5435	0.5924	0.5313	0.5959	0.3831	0.1184	0.1233	0.3847	0.369294	0.4264	0.414	0.5187	0.2908	0.2941	0.2939	0.4175	0.0838	0.4009	0.025	0.0315	0.0374
chr14:54159495-54159973 (+) // 81.4 // q22.2	Transcribed locus	---	230503_at	0.4251	0.3998	0.2856	0.4961	0.3407	0.2971	-0.0169	0.5371	0.5555	0.5558	0.5081	0.5709	0.3426	0.1417	0.1178	0.3439	0.368806	0.5851	0.5092	0.5925	0.3471	0.3552	0.3556	0.5197	0.131	0.535	-0.0062	0.0022	0.0003
chr8:27814243-27814562 (-) // 42.43 // p21.1	Transcribed locus	---	231546_at	0.4751	0.4297	0.4608	0.4615	0.4667	0.2752	0.1057	0.4466	0.4116	0.4598	0.3735	0.4276	0.3896	0.1228	0.1619	0.424	0.368256	0.3313	0.5009	0.5404	0.488	0.4819	0.4844	0.5848	0.196	0.5348	-0.0494	-0.0431	-0.0443
chr4:154921192-154929677 (-) // 96.13 // q31.3	secreted frizzled-related protein 2	SFRP2	223121_s_at	0.4144	0.3921	0.3509	0.5018	0.3884	0.2919	-0.0037	0.4918	0.5011	0.532	0.4952	0.5225	0.3272	0.1431	0.1331	0.3852	0.366688	0.3979	0.4962	0.6541	0.5992	0.6015	0.5982	0.4439	0.1265	0.4486	0.1087	0.1026	0.1225
chr5:37142094-37178299 (-) // 79.83 // p13.2	chromosome 5 open reading frame 42	C5orf42	219381_at	0.4302	0.4293	0.3499	0.5033	0.4115	0.3624	-0.0163	0.4228	0.4659	0.473	0.4967	0.4583	0.3296	0.1863	0.1431	0.4087	0.365919	0.2827	0.318	0.4671	0.3265	0.3292	0.33	0.5017	0.1682	0.5052	-0.0191	-0.0117	-0.0184
chr1:202505948-202506543 (-) // 18.14 // q32.1	---	---	238134_at	0.4698	0.4087	0.4167	0.4818	0.4425	0.2883	0.0499	0.4174	0.4293	0.4408	0.4127	0.4237	0.415	0.2314	0.2454	0.2773	0.365669	0.3625	0.5049	0.5337	0.4773	0.4769	0.4764	0.5208	0.1596	0.4771	0.0719	0.0722	0.1046
chr11:133444188-133524384 (+) // 99.42 // q25	junctional adhesion molecule 3	JAM3	231721_at	0.4035	0.375	0.4169	0.4642	0.5465	0.3977	0.1283	0.398	0.4092	0.4191	0.4732	0.3831	0.3915	0.1004	0.1381	0.3899	0.364662	0.1775	0.3569	0.4672	0.5796	0.5751	0.5819	0.4634	0.1487	0.5138	-0.0817	-0.0778	-0.0918
chr20:13041136-13043336 (+) // 66.12 // p12.1	CDNA FLJ13528 fis, clone PLACE1006143	---	233260_at	0.488	0.3997	0.3781	0.4423	0.5133	0.3204	0.0802	0.4053	0.3834	0.4288	0.3954	0.4075	0.397	0.1999	0.2345	0.3581	0.364494	0.3161	0.421	0.4561	0.3953	0.3934	0.396	0.6643	0.2211	0.6804	-0.0071	0.0005	0.0004
chr10:78314642-79067574 (-) // 95.29 // q22.3	potassium large conductance calcium-activated channel, subfamily M, alpha member 1	KCNMA1	221583_s_at	0.4904	0.4262	0.4712	0.4458	0.5211	0.3333	0.1289	0.4435	0.4177	0.4113	0.4104	0.3815	0.4195	0.1006	0.152	0.2626	0.3635	0.2738	0.5564	0.5052	0.6613	0.6664	0.6612	0.5336	0.1815	0.5125	-0.046	-0.0422	-0.0486
chr4:148896295-148896750 (+) // 60.03 // q31.23	Transcribed locus	---	239567_at	0.3841	0.3582	0.2181	0.462	0.295	0.2968	0.011	0.538	0.5861	0.5795	0.585	0.5869	0.3433	0.1353	0.1026	0.329	0.363181	0.4654	0.4495	0.5325	0.2994	0.306	0.3072	0.5035	0.1676	0.5264	-0.0388	-0.0294	-0.0332
chr11:133444188-133524384 (+) // 99.42 // q25	junctional adhesion molecule 3	JAM3	231720_s_at	0.4015	0.3638	0.4372	0.4548	0.5589	0.3941	0.1664	0.4049	0.3932	0.4077	0.4474	0.3676	0.4052	0.0848	0.1384	0.3843	0.363138	0.1736	0.3696	0.4595	0.5836	0.5767	0.5826	0.4662	0.1508	0.503	-0.0899	-0.0859	-0.0999
chr15:69739922-69847042 (+) // 69.92 // q23	---	---	1555817_s_at	0.49	0.4159	0.4739	0.4864	0.5125	0.2821	0.063	0.4264	0.3885	0.4321	0.3814	0.3989	0.3898	0.1526	0.1816	0.3332	0.363019	0.3735	0.5761	0.5581	0.6392	0.632	0.6308	0.4945	0.156	0.4404	0.0468	0.0454	0.0579
chr4:126631375-126633536 (+) // 96.43 // q28.1	FAT tumor suppressor homolog 4 (Drosophila)	FAT4	219427_at	0.4059	0.3824	0.2748	0.4914	0.4005	0.3491	0.0185	0.4536	0.5069	0.5096	0.5145	0.5106	0.3483	0.1401	0.1048	0.3952	0.362888	0.341	0.3683	0.5079	0.3526	0.3572	0.3612	0.4761	0.1344	0.4882	-0.0521	-0.0474	-0.0507
chr7:15617363-15692819 (-) // 92.7 // p21.1	mesenchyme homeobox 2	MEOX2	206201_s_at	0.5174	0.5312	0.3056	0.4087	0.3642	0.2733	0.0017	0.3827	0.3836	0.4156	0.3806	0.4017	0.2491	0.0967	0.0871	1	0.36245	0.2387	0.3052	0.4907	0.3224	0.3254	0.3257	0.3938	0.1076	0.3754	-0.0665	-0.0632	-0.0698
chr12:45378808-45379517 (+) // 88.74 // q13.11	Transcribed locus	---	236963_at	0.4531	0.4138	0.2768	0.4758	0.3497	0.2784	0.0325	0.5187	0.5085	0.554	0.4619	0.5621	0.3108	0.1406	0.1148	0.3476	0.362444	0.6319	0.6594	0.6758	0.5589	0.5543	0.5528	0.5032	0.1597	0.4603	-0.0066	-0.0047	0.0022
chr6:143971092-144188885 (+) // 98.82 // q24.2	phosphatase and actin regulator 2	PHACTR2	204049_s_at	0.3908	0.3607	0.2947	0.4737	0.4262	0.3344	0.0631	0.4747	0.454	0.5022	0.4584	0.4988	0.3262	0.2011	0.1654	0.3744	0.362425	0.3268	0.4056	0.5351	0.4298	0.4286	0.4306	0.4755	0.1464	0.4564	-0.0291	-0.0323	-0.0234
chr2:241680531-241683655 (+) // 93.73 // q37.3	sushi, nidogen and EGF-like domains 1	SNED1	213488_at	0.404	0.4028	0.2751	0.4136	0.3444	0.2997	-0.0373	0.5516	0.5517	0.5882	0.5241	0.58	0.3477	0.0885	0.0869	0.3742	0.3622	0.4439	0.4456	0.5253	0.3581	0.3685	0.3671	0.3891	0.0839	0.3888	0.0443	0.0488	0.0465
chr4:96308711-96689185 (-) // 99.78 // q22.3	unc-5 homolog C (C. elegans)	UNC5C	206189_at	0.385	0.3443	0.383	0.4726	0.4383	0.3078	0.0989	0.4437	0.4675	0.4797	0.5087	0.4543	0.4068	0.1351	0.1427	0.3251	0.362094	0.2609	0.4077	0.4594	0.4822	0.4836	0.4825	0.4734	0.1432	0.4705	-0.0504	-0.0445	-0.0455
chr1:119227192-119227919 (-) // 95.25 // p12	T-box 15	TBX15	230438_at	0.5545	0.6472	0.2958	0.4443	0.3579	0.3521	0.0961	0.3887	0.455	0.4311	0.469	0.4216	0.3033	0.0848	0.0782	0.4031	0.361419	0.4007	0.4754	0.54	0.3942	0.4031	0.4052	0.409	0.1067	0.4404	-0.0624	-0.0487	-0.0646
chr4:72271907-72653039 (+) // 98.41 // q13.3	solute carrier family 4, sodium bicarbonate cotransporter, member 4	SLC4A4	211494_s_at	0.437	0.364	0.3581	0.4676	0.4771	0.2822	0.0298	0.4272	0.4147	0.4507	0.4246	0.4367	0.337	0.2552	0.2545	0.3653	0.361356	0.2912	0.3991	0.4853	0.4145	0.4172	0.421	0.6081	0.1974	0.5758	-0.0116	-0.0107	-0.0036
chr5:38481397-38501316 (+) // 98.52 // p13.2	EGF-like, fibronectin type III and laminin G domains	EGFLAM	226911_at	0.477	0.479	0.3196	0.4266	0.413	0.3003	0.0871	0.4443	0.435	0.4688	0.4604	0.4411	0.3708	0.1247	0.1391	0.3856	0.360775	0.2436	0.3339	0.4463	0.3514	0.355	0.3573	0.427	0.1207	0.4321	-0.0426	-0.0344	-0.0424
chr20:36274291-36287167 (-) // 45.92 // q11.23	KIAA1755	KIAA1755	1561394_s_at	0.3822	0.3704	0.4165	0.5406	0.4259	0.342	0.0698	0.442	0.4614	0.4639	0.4108	0.4749	0.3125	0.1385	0.1129	0.3665	0.358175	0.327	0.3607	0.5298	0.3616	0.3636	0.3656	0.4807	0.1335	0.4321	-0.0376	-0.0307	-0.0374
chr14:60814153-60816096 (-) // 89.32 // q23.1	transmembrane protein 30B	TMEM30B	213285_at	0.5002	0.4545	0.3079	0.4629	0.3552	0.25	-0.006	0.3294	0.3787	0.3883	0.3852	0.379	0.2294	0.5726	0.4922	0.2475	0.357937	0.4205	0.4972	0.4921	0.4268	0.4345	0.436	0.4593	0.1233	0.4644	0.2673	0.2455	0.2969
chr6:144187187-144194014 (+) // 93.16 // q24.2	phosphatase and actin regulator 2	PHACTR2	227947_at	0.3787	0.406	0.2942	0.4697	0.4209	0.3419	0.088	0.4334	0.4612	0.4613	0.4822	0.4487	0.3047	0.1749	0.1111	0.4277	0.356538	0.3043	0.3927	0.5613	0.4149	0.4153	0.4158	0.4333	0.1748	0.4384	-0.073	-0.0729	-0.0757
chr6:55407131-55486894 (-) // 95.35 // p12.1	3-hydroxymethyl-3-methylglutaryl-Coenzyme A lyase-like 1	HMGCLL1	232305_at	0.4325	0.3749	0.3312	0.4888	0.4159	0.3338	-0.0087	0.4189	0.4747	0.4927	0.5129	0.4692	0.314	0.1418	0.1282	0.3831	0.356494	0.3309	0.4286	0.5225	0.4163	0.4208	0.4224	0.5832	0.1731	0.6112	-0.0593	-0.056	-0.0633
chr4:20230638-20231282 (+) // 90.18 // p15.31	---	---	228850_s_at	0.4049	0.4499	0.3547	0.4996	0.3697	0.3417	0.1391	0.4226	0.5028	0.4429	0.4679	0.4468	0.2929	0.0978	0.0701	0.3934	0.35605	0.3291	0.3842	0.5152	0.3579	0.3621	0.3642	0.4298	0.1216	0.4262	-0.058	-0.0531	-0.052
chr3:71701641-71706298 (-) // 84.82 // p14.1	CDNA: FLJ22140 fis, clone HEP20977	---	232096_x_at	0.4478	0.3667	0.3144	0.4801	0.3767	0.239	-0.0176	0.4906	0.4933	0.5476	0.4727	0.5491	0.3232	0.1587	0.1407	0.3134	0.356025	0.4182	0.4587	0.5389	0.3297	0.3341	0.3341	0.5673	0.1878	0.5257	0.0743	0.0753	0.1207
chr4:87830974-87831406 (+) // 64.33 // q21.3	Protein tyrosine phosphatase, non-receptor type 13 (APO-1/CD95 (Fas)-associated phosphatase)	PTPN13	243792_x_at	0.4285	0.3586	0.2491	0.4735	0.2598	0.2995	0.0066	0.4625	0.4861	0.5277	0.4798	0.5215	0.3195	0.2795	0.2275	0.3106	0.355644	0.4335	0.4564	0.5477	0.3619	0.3652	0.3686	0.5354	0.1706	0.5172	0.0116	0.0155	0.0295
chr2:202607554-202611405 (+) // 100.0 // q33.1	frizzled homolog 7 (Drosophila)	FZD7	203706_s_at	0.436	0.4374	0.2944	0.4664	0.3252	0.3993	0.0824	0.4615	0.4795	0.4843	0.4941	0.4815	0.3047	0.1147	0.0788	0.3341	0.354644	0.3709	0.4007	0.4952	0.3783	0.3852	0.3847	0.3775	0.0923	0.401	-0.024	-0.019	-0.0172
chr12:29546122-29548963 (-) // 78.42 // p11.22	transmembrane and tetratricopeptide repeat containing 1	TMTC1	226931_at	0.4276	0.3934	0.2807	0.4619	0.319	0.293	0.0169	0.5046	0.484	0.5342	0.4754	0.5382	0.3257	0.1276	0.0986	0.3905	0.354456	0.3773	0.4454	0.574	0.4334	0.4404	0.4407	0.4517	0.1115	0.4309	0.0246	0.0289	0.0377
chr5:149342814-149347156 (+) // 81.85 // q33.1	solute carrier family 26 (sulfate transporter), member 2	SLC26A2	224963_at	0.4046	0.345	0.3135	0.4473	0.4326	0.2803	0.0303	0.379	0.3957	0.4091	0.4224	0.3997	0.2852	0.4324	0.3919	0.301	0.354375	0.3092	0.3962	0.4442	0.3657	0.3709	0.373	0.5766	0.1792	0.5799	0.0476	0.0352	0.0716
chr1:65877324-65879827 (+) // 85.91 // p31.3	CDNA clone IMAGE:4795984	---	1556997_a_at	0.4939	0.4497	0.3406	0.494	0.375	0.2842	0.0377	0.4474	0.4985	0.4994	0.4467	0.4967	0.3118	0.118	0.0973	0.2783	0.354325	0.7464	0.7949	0.7313	0.6832	0.6873	0.68	0.4613	0.1486	0.4316	-0.0335	-0.0301	-0.0326
chr2:202607554-202611409 (+) // 99.66 // q33.1	frizzled homolog 7 (Drosophila)	FZD7	203705_s_at	0.4659	0.4439	0.3328	0.4686	0.3655	0.4225	0.1148	0.4252	0.4265	0.4414	0.4634	0.4275	0.3382	0.118	0.0954	0.3181	0.354231	0.3048	0.3984	0.4834	0.4402	0.4467	0.4449	0.4361	0.1294	0.4543	-0.0322	-0.0281	-0.0306
chr4:19863980-20229841 (+) // 99.87 // p15.31	slit homolog 2 (Drosophila)	SLIT2	209897_s_at	0.4244	0.3806	0.3068	0.4994	0.3908	0.3262	0.0561	0.4712	0.4651	0.4906	0.4656	0.4924	0.3281	0.1022	0.0981	0.3574	0.353437	0.3356	0.3968	0.4951	0.3719	0.3736	0.3779	0.4328	0.1067	0.4356	-0.0288	-0.0238	-0.0248
chr2:45085847-45090046 (-) // 90.12 // p21	SIX homeobox 2	SIX2	206510_at	0.5376	0.5716	0.4345	0.5436	0.4481	0.318	0.0486	0.3487	0.3842	0.3609	0.355	0.363	0.2558	0.1659	0.1662	0.3526	0.353394	0.4328	0.4695	0.5188	0.4602	0.4701	0.4672	0.3715	0.0996	0.3611	0.0241	0.0252	-0.0005
chr12:102907315-102933013 (-) // 98.19 // q23.3	glycosyltransferase 8 domain containing 2	GLT8D2	221447_s_at	0.4457	0.4283	0.2805	0.3726	0.3515	0.3366	0.0673	0.4815	0.4542	0.4908	0.4544	0.4725	0.332	0.0856	0.1044	0.4906	0.353031	0.2114	0.3002	0.4149	0.3617	0.3646	0.3686	0.289	0.053	0.3041	0.0416	0.0419	0.0482
chr4:107036084-107068207 (+) // 93.65 // q24	nephronectin	NPNT	244747_at	0.4132	0.3619	0.4213	0.4627	0.447	0.2905	0.0926	0.4223	0.4086	0.4364	0.4277	0.3951	0.3428	0.1683	0.1965	0.3596	0.352906	0.221	0.4485	0.5167	0.6459	0.6495	0.6436	0.4464	0.1531	0.4512	0.0017	0.0016	0.0038
chr12:123346023-123366523 (+) // 95.54 // q24.31	family with sequence similarity 101, member A	FAM101A	227320_at	0.3306	0.3144	0.2426	0.4379	0.3694	0.3612	0.0876	0.4273	0.5064	0.4819	0.5395	0.4843	0.34	0.2636	0.2071	0.2492	0.352688	0.2905	0.289	0.3943	0.2255	0.233	0.2344	0.4976	0.1374	0.6012	0.0199	0.0246	0.0312
chr1:25984262-25985284 (+) // 30.91 // p36.11	mannosidase, alpha, class 1C, member 1	MAN1C1	214180_at	0.3716	0.3578	0.3646	0.47	0.4259	0.2786	-0.0199	0.4561	0.5176	0.488	0.5076	0.4949	0.3246	0.1181	0.1143	0.3591	0.351806	0.4445	0.5295	0.5823	0.4563	0.4622	0.4624	0.503	0.1944	0.4557	-0.0439	-0.0388	-0.0568
chr5:15707132-15707537 (+) // 93.94 // p15.1	Transcribed locus	---	241457_at	0.3713	0.3248	0.2257	0.3893	0.2814	0.262	-0.0257	0.6039	0.5406	0.6146	0.5265	0.6188	0.35	0.0941	0.0781	0.3735	0.351806	0.3735	0.3967	0.4799	0.2499	0.2525	0.2539	0.4113	0.0915	0.3984	0.0314	0.0321	0.0609
chr9:88749097-88751924 (-) // 91.58 // q21.33	growth arrest-specific 1	GAS1	204457_s_at	0.3433	0.3457	0.2856	0.3859	0.2908	0.2708	-0.0243	0.5714	0.5176	0.5635	0.5111	0.5572	0.3347	0.1074	0.1024	0.4303	0.349587	0.2615	0.3253	0.4841	0.3396	0.346	0.3465	0.3383	0.0754	0.3623	0.0327	0.0352	0.0424
chr6:144120807-144121362 (+) // 51.77 // q24.2	Transcribed locus	---	242542_at	0.3759	0.3074	0.3001	0.4293	0.3934	0.3052	0.0815	0.49	0.4365	0.5065	0.4603	0.4816	0.3795	0.1446	0.1695	0.3243	0.3491	0.3261	0.4192	0.4743	0.4383	0.4291	0.4318	0.4792	0.1318	0.4793	-0.0207	-0.0149	-0.0236
chr5:149342814-149347156 (+) // 81.85 // q33.1	solute carrier family 26 (sulfate transporter), member 2	SLC26A2	224959_at	0.3791	0.3412	0.2788	0.4512	0.4037	0.2815	0.008	0.3677	0.4147	0.4103	0.4282	0.4082	0.2646	0.4654	0.3731	0.3072	0.348931	0.3475	0.3858	0.4609	0.3361	0.3437	0.3455	0.5329	0.1648	0.541	0.063	0.0484	0.0907
chr10:96003948-96078136 (+) // 95.18 // q23.33	phospholipase C, epsilon 1	PLCE1	205111_s_at	0.4283	0.4018	0.3626	0.4439	0.3823	0.2801	0.0257	0.3795	0.3836	0.4188	0.379	0.4112	0.246	0.3813	0.3111	0.3377	0.348306	0.2996	0.4057	0.4895	0.4229	0.4245	0.4252	0.4363	0.1113	0.3955	0.0714	0.0527	0.111
chr6:55408188-55551852 (-) // 98.18 // p12.1	3-hydroxymethyl-3-methylglutaryl-Coenzyme A lyase-like 1	HMGCLL1	1554872_a_at	0.4252	0.3495	0.3615	0.4598	0.4925	0.3011	0.0788	0.4041	0.4271	0.439	0.4486	0.406	0.3786	0.1027	0.1385	0.3591	0.348256	0.2897	0.4271	0.4749	0.4752	0.4799	0.4829	0.5657	0.1626	0.5974	-0.0543	-0.04	-0.0644
chr8:69378095-69406281 (-) // 19.46 // q13.2	hypothetical protein LOC286189	LOC286189	1556421_at	0.4085	0.3667	0.2885	0.4698	0.4003	0.3088	0.0373	0.3975	0.4374	0.4502	0.4649	0.4479	0.3368	0.2018	0.1746	0.3782	0.348075	0.3344	0.3652	0.4968	0.3108	0.3181	0.3194	0.5622	0.163	0.5297	-0.0072	-0.0027	-0.0052
chr7:128652119-128857287 (+) // 94.23 // q32.1	S-adenosylhomocysteine hydrolase-like 2	AHCYL2	212814_at	0.3863	0.3592	0.3098	0.4371	0.4003	0.2482	-0.0266	0.3639	0.4401	0.4185	0.4409	0.4145	0.2747	0.4383	0.3688	0.2863	0.347519	0.4345	0.4984	0.5209	0.4636	0.4683	0.4682	0.454	0.1341	0.4336	0.0548	0.0456	0.063
chr10:5484395-5489674 (+) // 98.7 // p15.1	neuroepithelial cell transforming gene 1	NET1	201830_s_at	0.3703	0.3673	0.3095	0.4363	0.3349	0.306	0.0744	0.3364	0.3838	0.357	0.4004	0.3449	0.2625	0.5219	0.4621	0.2772	0.346556	0.2863	0.351	0.4473	0.3947	0.397	0.3988	0.3664	0.0972	0.3915	0.1602	0.1478	0.1387
chr3:73694877-73697639 (-) // 49.1 // p13	MRNA; cDNA DKFZp586L2217 (from clone DKFZp586L2217)	---	1566551_at	0.3914	0.3393	0.2359	0.4111	0.2834	0.2604	0.0072	0.5665	0.4796	0.5705	0.489	0.5662	0.3266	0.1258	0.115	0.3738	0.346356	0.3787	0.4039	0.5154	0.2816	0.2819	0.2825	0.4273	0.1235	0.4009	-0.0176	-0.0127	-0.0099
chr15:78968946-79031154 (+) // 97.38 // q25.1	KIAA1199	KIAA1199	212942_s_at	0.3479	0.3431	0.3148	0.4322	0.4537	0.4626	0.1432	0.3803	0.4018	0.4086	0.4147	0.4023	0.2997	0.1985	0.175	0.3622	0.346287	0.2364	0.2652	0.4565	0.3234	0.3305	0.3346	0.4139	0.126	0.4168	-0.0216	-0.016	-0.0213
chr4:72423633-72558100 (+) // 99.4 // q13.3	solute carrier family 4, sodium bicarbonate cotransporter, member 4	SLC4A4	1554027_a_at	0.4091	0.3506	0.2985	0.4751	0.4128	0.2849	0.0338	0.4398	0.4076	0.4672	0.4443	0.4573	0.3177	0.1827	0.1717	0.3646	0.344856	0.2883	0.3719	0.4583	0.3078	0.306	0.3108	0.5315	0.1669	0.5133	-0.0241	-0.0208	-0.0189
chr4:72321113-72653607 (+) // 98.89 // q13.3	solute carrier family 4, sodium bicarbonate cotransporter, member 4	SLC4A4	210739_x_at	0.3895	0.3501	0.3449	0.441	0.4877	0.2688	0.0062	0.3891	0.4176	0.4148	0.4396	0.4012	0.328	0.2515	0.2525	0.3338	0.344769	0.3003	0.3832	0.4577	0.4366	0.4402	0.4457	0.5194	0.1689	0.533	0.0027	0.0076	0.0079
chr5:149320663-149342786 (+) // 99.63 // q33.1	solute carrier family 26 (sulfate transporter), member 2	SLC26A2	205097_at	0.3794	0.3233	0.281	0.4385	0.4007	0.2669	0.0219	0.3682	0.3906	0.4073	0.4106	0.4041	0.2629	0.4657	0.392	0.2943	0.344213	0.3208	0.3775	0.4394	0.3309	0.3367	0.3391	0.543	0.1571	0.5393	0.0727	0.059	0.1007
chr15:72253957-72256265 (+) // 95.83 // q24.1	immunoglobulin superfamily containing leucine-rich repeat	ISLR	207191_s_at	0.3063	0.3096	0.2677	0.4059	0.3345	0.318	-0.0178	0.5415	0.5351	0.5218	0.514	0.5328	0.3527	0.1181	0.1032	0.363	0.34415	0.2906	0.3079	0.4618	0.2704	0.2812	0.2852	0.379	0.086	0.3798	0.0609	0.0622	0.0701
chr7:150717153-150717558 (-) // 60.25 // q36.1	Transcribed locus	---	242452_at	0.3791	0.342	0.2772	0.4884	0.3925	0.2895	0.0364	0.4505	0.461	0.4939	0.4476	0.5018	0.2968	0.1554	0.119	0.3667	0.343612	0.3757	0.3353	0.4857	0.2489	0.2531	0.2559	0.5312	0.1624	0.5155	0.0115	0.0167	0.0226
chr4:122173856-122174396 (-) // 77.02 // q27	CDNA FLJ36413 fis, clone THYMU2010816	---	230319_at	0.437	0.4038	0.3238	0.4425	0.3798	0.3179	0.0215	0.3932	0.4332	0.4401	0.4366	0.4356	0.3018	0.2074	0.1663	0.3485	0.343062	0.3772	0.4457	0.511	0.378	0.3848	0.3876	0.4232	0.1127	0.3841	0.0507	0.0533	0.0651
chr6:144074842-144189317 (+) // 97.44 // q24.2	phosphatase and actin regulator 2	PHACTR2	204047_s_at	0.3874	0.3473	0.4436	0.4466	0.5256	0.331	0.1271	0.4233	0.3545	0.369	0.3675	0.3487	0.3957	0.1101	0.1792	0.3227	0.342456	0.1875	0.3746	0.4544	0.5279	0.5243	0.5232	0.4559	0.1377	0.4405	-0.0586	-0.0567	-0.0775
chr3:71604293-71607660 (-) // 60.78 // p14.1	CDNA: FLJ21411 fis, clone COL03986	---	215221_at	0.4086	0.3385	0.2364	0.4669	0.3454	0.2358	-0.0445	0.4904	0.4935	0.5523	0.4722	0.5626	0.3283	0.1581	0.1293	0.3022	0.34225	0.4574	0.4755	0.5439	0.3359	0.3394	0.341	0.5681	0.1755	0.5009	0.0978	0.1006	0.1315
chr4:38290716-38342644 (-) // 78.63 // p14	hypothetical FLJ13197 /// hypothetical protein LOC100132861	FLJ13197 /// LOC100132861	219871_at	0.4195	0.344	0.2404	0.4019	0.2642	0.2235	-0.0643	0.5597	0.5174	0.5895	0.5072	0.5967	0.3268	0.1361	0.1134	0.2935	0.341844	0.4166	0.4652	0.51	0.3748	0.3793	0.3794	0.4628	0.1329	0.4215	0.0222	0.0192	0.0527
chr17:43458534-43470151 (-) // 90.92 // q21.32	coatomer protein complex, subunit zeta 2	COPZ2	219561_at	0.4217	0.5163	0.2989	0.3834	0.3832	0.3835	0.1608	0.4051	0.4244	0.4122	0.3878	0.3997	0.2742	0.046	0.0599	0.5043	0.341338	0.2407	0.319	0.5155	0.3734	0.3767	0.3776	0.323	0.0967	0.3162	-0.0617	-0.0543	-0.0678
chr4:156876294-156877661 (+) // 89.3 // q32.1	CDNA clone IMAGE:5302158	---	227235_at	0.4131	0.3723	0.3408	0.4767	0.4049	0.2609	-0.0312	0.4268	0.4407	0.4854	0.4308	0.4775	0.2795	0.1301	0.0991	0.4213	0.339294	0.3301	0.3988	0.5769	0.4341	0.4379	0.4385	0.506	0.1688	0.4943	0.0144	0.0117	0.0337
chr9:18900212-18900945 (+) // 99.05 // p22.1	ADAMTS-like 1	ADAMTSL1	229585_at	0.3487	0.3581	0.2551	0.3746	0.3785	0.4937	0.0983	0.4701	0.4645	0.4634	0.4502	0.4603	0.3274	0.0863	0.0683	0.3196	0.338569	0.3698	0.3923	0.4707	0.3449	0.3521	0.3525	0.3649	0.0981	0.3692	-0.0545	-0.0458	-0.0527
chr13:101157119-101169132 (+) // 84.95 // q33.1	integrin, beta-like 1 (with EGF-like repeat domains)	ITGBL1	214927_at	0.3809	0.3644	0.3175	0.4372	0.3739	0.4159	0.1116	0.4246	0.4129	0.4426	0.4083	0.4457	0.312	0.1064	0.0994	0.3538	0.337944	0.3181	0.3889	0.5081	0.3733	0.3735	0.3757	0.3721	0.0944	0.3388	0.023	0.0262	0.0318
chr1:221251431-221251874 (+) // 97.36 // q41	Transcribed locus	---	236712_at	0.3444	0.3226	0.2978	0.4632	0.3697	0.3392	0.0164	0.4145	0.4393	0.4827	0.4576	0.4634	0.2819	0.1485	0.1304	0.4354	0.337938	0.271	0.2818	0.4537	0.2833	0.2869	0.2903	0.4526	0.1576	0.4642	-0.0269	-0.016	-0.0267
chr6:55484833-55551830 (-) // 99.06 // p12.1	3-hydroxymethyl-3-methylglutaryl-Coenzyme A lyase-like 1	HMGCLL1	233576_at	0.4231	0.3748	0.3359	0.4491	0.4008	0.3002	0.0569	0.3913	0.3791	0.4115	0.4399	0.3935	0.3592	0.1678	0.1658	0.3527	0.3376	0.2199	0.3148	0.4141	0.313	0.3173	0.3193	0.5948	0.2047	0.6159	-0.0146	-0.0096	-0.006
chr3:73112532-73113168 (+) // 69.38 // p13	Transcribed locus	---	241864_x_at	0.3516	0.4061	0.2985	0.4214	0.2859	0.3208	0.1064	0.4247	0.4868	0.483	0.4737	0.4763	0.3046	0.1039	0.058	0.3949	0.337287	0.2593	0.3274	0.4836	0.3418	0.3444	0.3434	0.3761	0.1193	0.3773	0.0112	0.0122	0.0407
chr12:29550187-29561687 (-) // 96.94 // p11.22	transmembrane and tetratricopeptide repeat containing 1	TMTC1	224397_s_at	0.416	0.4451	0.2895	0.4105	0.3266	0.3309	0.0686	0.4124	0.4332	0.4389	0.4569	0.4273	0.309	0.1101	0.0823	0.4249	0.336387	0.307	0.4214	0.5443	0.4842	0.4885	0.4864	0.4074	0.106	0.4178	-0.0421	-0.0373	-0.0437
chr10:125495146-125496093 (-) // 81.89 // q26.13	carboxypeptidase X (M14 family), member 2	CPXM2	226824_at	0.3607	0.3421	0.3494	0.423	0.36	0.2505	0.0028	0.5102	0.485	0.4936	0.4343	0.4915	0.3413	0.0927	0.0964	0.344	0.336094	0.3905	0.4778	0.5632	0.4698	0.4775	0.4716	0.3341	0.072	0.3016	0.009	0.0137	0.0167
chr17:51151988-51155141 (-) // 99.94 // q22	transmembrane protein 100	TMEM100	219230_at	0.4318	0.4224	0.3192	0.4591	0.3712	0.2995	0.0045	0.3842	0.4087	0.4424	0.4236	0.4151	0.2829	0.1445	0.1131	0.4523	0.335906	0.278	0.3472	0.5127	0.3782	0.3845	0.3865	0.4355	0.1263	0.4404	-0.0122	-0.0077	-0.0047
chr5:15828819-15830382 (+) // 83.81 // p15.1	Homo sapiens, clone IMAGE:4043849, mRNA	---	1560813_at	0.3737	0.3138	0.1905	0.3863	0.2826	0.2848	0.0061	0.5064	0.501	0.5713	0.5387	0.559	0.3374	0.1029	0.0808	0.3372	0.335781	0.3667	0.4035	0.451	0.2929	0.2923	0.295	0.3874	0.0975	0.4077	0.0214	0.0226	0.0389
chr12:29545023-29546200 (-) // 84.89 // p11.22	transmembrane and tetratricopeptide repeat containing 1	TMTC1	226322_at	0.4143	0.4389	0.3028	0.4103	0.3265	0.2641	0.0119	0.4485	0.459	0.4774	0.4488	0.4704	0.282	0.0866	0.062	0.4619	0.335338	0.3427	0.4349	0.5648	0.4397	0.4455	0.4448	0.4116	0.0944	0.4083	-0.0328	-0.0301	-0.0212
chr3:71577545-71580477 (-) // 74.66 // p14.1	CDNA: FLJ21309 fis, clone COL02152	---	1560353_at	0.3864	0.3074	0.2834	0.453	0.4219	0.2475	0.0981	0.4146	0.4417	0.4602	0.4273	0.463	0.3752	0.134	0.147	0.2939	0.334663	0.3514	0.4075	0.4773	0.3643	0.3618	0.3664	0.5332	0.2318	0.4897	0.0128	0.0256	0.0252
chr8:72272223-72437021 (-) // 97.38 // q13.3	eyes absent homolog 1 (Drosophila)	EYA1	214608_s_at	0.443	0.4066	0.3298	0.4646	0.3675	0.3576	0.0469	0.3822	0.3977	0.4207	0.4047	0.4057	0.2925	0.1365	0.1356	0.3535	0.334069	0.2708	0.3523	0.4698	0.3901	0.3923	0.3928	0.4701	0.135	0.4608	-0.0252	-0.0252	-0.0269
chr3:71639436-71641215 (-) // 50.75 // p14.1	Transcribed locus	---	1570134_at	0.4051	0.3253	0.2979	0.4342	0.3697	0.2555	0.0892	0.4599	0.4072	0.5023	0.4086	0.4903	0.3512	0.1046	0.1156	0.3133	0.333119	0.2956	0.399	0.4812	0.3495	0.3457	0.3483	0.5466	0.1898	0.4886	0.0062	0.0132	0.031
chr15:69739922-69847042 (+) // 69.92 // q23	---	---	1555816_at	0.4793	0.3895	0.4774	0.4323	0.4853	0.2568	0.0864	0.375	0.3387	0.3692	0.3111	0.3305	0.3964	0.1193	0.1647	0.2989	0.331925	0.2833	0.5218	0.4909	0.6357	0.6214	0.6207	0.4639	0.1605	0.3916	0.014	0.0139	0.0218
chr13:92743667-92745365 (+) // 67.46 // q31.3	Clone IMAGE:297403, mRNA sequence	---	232453_at	0.372	0.3413	0.3157	0.4708	0.3782	0.3004	0.0135	0.4398	0.4393	0.482	0.4314	0.4798	0.3303	0.1195	0.0911	0.3017	0.331675	0.3678	0.403	0.4977	0.3413	0.3391	0.3442	0.384	0.09	0.3753	-0.0221	-0.0196	-0.0122
chr10:105343778-105346192 (-) // 97.53 // q24.33	SH3 and PX domains 2A	SH3PXD2A	224817_at	0.3258	0.3045	0.27	0.3624	0.3111	0.3405	0.0195	0.4591	0.4485	0.4717	0.424	0.4755	0.2826	0.2715	0.2475	0.2902	0.331525	0.2678	0.2899	0.4361	0.2779	0.2804	0.2861	0.3477	0.0695	0.3436	0.049	0.0475	0.0607
chr12:45063722-45556205 (+) // 75.78 // q13.11	CDNA clone IMAGE:3961179	---	1559817_at	0.4426	0.4121	0.3606	0.4411	0.3957	0.2664	0.0513	0.4227	0.4096	0.4213	0.3932	0.4033	0.3629	0.1029	0.1183	0.2875	0.330719	0.4414	0.6261	0.6037	0.7036	0.7024	0.692	0.4255	0.1105	0.4002	-0.023	-0.0084	-0.0274
chr4:72271866-72654298 (+) // 98.08 // q13.3	solute carrier family 4, sodium bicarbonate cotransporter, member 4	SLC4A4	210738_s_at	0.3853	0.3322	0.3301	0.4023	0.4803	0.2725	0.0353	0.3479	0.3571	0.3936	0.4239	0.3584	0.2946	0.2694	0.269	0.3181	0.329375	0.2165	0.3392	0.4163	0.4544	0.454	0.4594	0.4683	0.1544	0.5163	-0.0077	-0.011	-0.0091
chr9:99326257-99403351 (+) // 99.96 // q22.33	tropomodulin 1	TMOD1	203662_s_at	0.4308	0.4283	0.2573	0.4071	0.3911	0.2444	0.082	0.4221	0.4527	0.4504	0.4562	0.4488	0.297	0.1013	0.0867	0.3039	0.328756	0.3647	0.4041	0.4647	0.324	0.3309	0.3332	0.427	0.1377	0.427	-0.0481	-0.0317	-0.0476
chr4:154921191-154929674 (-) // 99.85 // q31.3	secreted frizzled-related protein 2	SFRP2	223122_s_at	0.3598	0.3467	0.3005	0.4353	0.3355	0.2328	-0.0506	0.4548	0.4679	0.4971	0.4336	0.5	0.2822	0.1483	0.1418	0.3741	0.328737	0.3586	0.4045	0.5757	0.4578	0.4628	0.4614	0.3907	0.0958	0.3923	0.1738	0.1646	0.2005
chr13:36316967-36318229 (-) // 82.27 // q13.3	SMAD family member 9	SMAD9	227719_at	0.4313	0.4039	0.3692	0.462	0.367	0.3095	-0.009	0.405	0.4007	0.4332	0.3978	0.4172	0.2688	0.131	0.1081	0.3614	0.328569	0.3458	0.4726	0.5527	0.5042	0.5087	0.5086	0.4217	0.1171	0.4078	-0.0415	-0.0503	-0.0335
chr13:100902966-101166794 (+) // 91.07 // q33.1	integrin, beta-like 1 (with EGF-like repeat domains)	ITGBL1	205422_s_at	0.3629	0.3647	0.317	0.4188	0.3659	0.4498	0.1611	0.4009	0.3962	0.4135	0.3929	0.411	0.313	0.0908	0.0799	0.3148	0.328325	0.2458	0.3537	0.48	0.4133	0.4135	0.4145	0.3485	0.0966	0.3228	0.0464	0.0465	0.056
chr10:96003948-96078136 (+) // 95.18 // q23.33	phospholipase C, epsilon 1	PLCE1	205112_at	0.3899	0.3557	0.2939	0.4136	0.3588	0.2699	0.0373	0.356	0.3693	0.397	0.3885	0.3846	0.2382	0.3713	0.3235	0.2959	0.327712	0.2951	0.3921	0.4587	0.4143	0.4152	0.4167	0.3988	0.1046	0.3822	0.0657	0.0492	0.0795
chr5:15553781-15992902 (+) // 97.11 // p15.1	F-box and leucine-rich repeat protein 7	FBXL7	213249_at	0.3152	0.302	0.2197	0.3477	0.3094	0.3332	0.0574	0.5311	0.5245	0.522	0.5172	0.5261	0.386	0.0158	0.0066	0.3231	0.327312	0.2518	0.2973	0.3935	0.2734	0.2768	0.2784	0.2797	0.0485	0.3049	-0.0036	0.0001	-0.0023
chr4:156875444-156876254 (+) // 96.17 // q32.1	CDNA clone IMAGE:5302158	---	239580_at	0.4098	0.3632	0.4223	0.4621	0.4918	0.2704	0.0167	0.3733	0.3676	0.3799	0.3817	0.3608	0.3375	0.0984	0.128	0.3662	0.326856	0.2449	0.3751	0.5047	0.5319	0.5339	0.5333	0.5024	0.1719	0.505	-0.0296	-0.0255	-0.034
chr12:51777715-51782391 (+) // 94.96 // q13.13	insulin-like growth factor binding protein 6	IGFBP6	203851_at	0.3334	0.3544	0.2987	0.3837	0.3165	0.4262	0.1167	0.3867	0.3984	0.3906	0.3898	0.3827	0.3065	0.1899	0.203	0.3462	0.326462	0.2437	0.3131	0.4207	0.2926	0.3021	0.3035	0.3145	0.0741	0.3096	-0.0276	-0.0228	-0.055
chr15:76419757-76427622 (+) // 91.29 // q25.1	cellular retinoic acid binding protein 1	CRABP1	205350_at	0.3268	0.3256	0.2962	0.4627	0.4228	0.321	0.0304	0.3681	0.4154	0.3972	0.4365	0.4059	0.259	0.1855	0.1504	0.417	0.326281	0.2948	0.2981	0.431	0.2372	0.2419	0.245	0.4434	0.1209	0.4252	0.0019	0.0099	0.0002
chr3:113150494-113177826 (+) // 95.89 // q13.2	pleckstrin homology-like domain, family B, member 2	PHLDB2	225688_s_at	0.2991	0.3664	0.2554	0.4105	0.272	0.3611	0.0792	0.3971	0.4465	0.4311	0.4269	0.4255	0.3047	0.2164	0.1332	0.3882	0.325831	0.273	0.334	0.4763	0.2951	0.3003	0.3038	0.3282	0.0955	0.3454	-0.0539	-0.0496	-0.046
chr4:20230647-20231281 (-) // 100.0 // p15.31	Transcribed locus	---	230130_at	0.3603	0.3582	0.256	0.4576	0.313	0.3042	0.0722	0.4484	0.4634	0.4628	0.4586	0.4705	0.3151	0.0753	0.0522	0.3409	0.325544	0.2649	0.3048	0.4346	0.3142	0.3189	0.3228	0.3338	0.0831	0.3551	-0.0229	-0.0131	-0.0143
chr2:45086316-45089805 (-) // 90.04 // p21	SIX homeobox 2	SIX2	206511_s_at	0.4829	0.5091	0.3657	0.4822	0.4521	0.2904	0.0816	0.3213	0.3579	0.3231	0.3445	0.324	0.2567	0.1454	0.1656	0.3037	0.325388	0.425	0.4694	0.4829	0.4937	0.5096	0.5066	0.3197	0.0895	0.3245	0.0365	0.0432	-0.0129
chr1:201711578-201722909 (+) // 99.42 // q32.1	proline/arginine-rich end leucine-rich repeat protein	PRELP	204223_at	0.3142	0.3341	0.2886	0.3856	0.266	0.2259	-0.0299	0.5162	0.5139	0.4961	0.5	0.496	0.3259	0.0843	0.0852	0.4017	0.325237	0.3453	0.3992	0.506	0.3594	0.3678	0.3686	0.3596	0.0832	0.3858	-0.0176	-0.0086	-0.0157
chr9:88752835-88753728 (+) // 56.32 // q21.33	Homo sapiens, clone IMAGE:5309572, mRNA	---	238463_at	0.345	0.3609	0.3457	0.3806	0.3484	0.2495	-0.0067	0.4564	0.4188	0.419	0.4199	0.4161	0.3819	0.1577	0.1967	0.3104	0.325019	0.2889	0.3312	0.4003	0.3101	0.3189	0.319	0.3481	0.0778	0.3419	0.0349	0.0573	0.0048
chr10:30343771-30357407 (-) // 95.36 // p11.23	KIAA1462	KIAA1462	231842_at	0.3584	0.3707	0.2934	0.3874	0.3721	0.376	0.0922	0.4158	0.4333	0.4342	0.4466	0.4281	0.3406	0.0577	0.0462	0.3442	0.324806	0.2994	0.3932	0.4875	0.4016	0.4057	0.408	0.3637	0.091	0.343	-0.0539	-0.0518	-0.0505
chr2:160505505-160627367 (-) // 98.53 // q24.2	phospholipase A2 receptor 1, 180kDa	PLA2R1	210194_at	0.3803	0.4086	0.5733	0.4835	0.3171	0.2563	0.1311	0.3171	0.3449	0.356	0.3852	0.3294	0.2746	0.1685	0.1644	0.3045	0.324675	0.1705	0.291	0.3746	0.3109	0.3091	0.3109	0.3784	0.1503	0.3795	-0.0396	-0.0346	-0.0329
chr13:93219876-93221976 (+) // 74.95 // q31.3	Clone IMAGE:212461, mRNA sequence	---	233222_at	0.3485	0.3257	0.3081	0.4526	0.3727	0.2771	0.0733	0.4388	0.4344	0.4618	0.4214	0.4614	0.3738	0.0926	0.0823	0.2628	0.324206	0.357	0.3891	0.4683	0.3241	0.3231	0.3255	0.37	0.1136	0.3573	-0.0279	-0.0132	-0.0219
chr19:51492153-51508585 (+) // 65.16 // q13.32	hypoxia inducible factor 3, alpha subunit	HIF3A	1555318_at	0.3985	0.3507	0.2929	0.39	0.3437	0.2715	0.0357	0.4299	0.3999	0.449	0.4126	0.4434	0.32	0.134	0.1372	0.3775	0.324156	0.3061	0.3457	0.4423	0.2679	0.2702	0.2739	0.498	0.1511	0.4622	-0.0415	-0.0353	-0.0288
chr4:8645382-8672378 (+) // 97.21 // p16.1	carboxypeptidase Z	CPZ	211062_s_at	0.3052	0.2952	0.292	0.4274	0.3441	0.2849	0.0478	0.4866	0.4407	0.4661	0.4118	0.4745	0.3202	0.1295	0.125	0.3099	0.322556	0.2841	0.3387	0.4947	0.3659	0.3714	0.3715	0.3499	0.0726	0.3211	0.0395	0.0448	0.0504
chr3:73111607-73112033 (+) // 55.89 // p13	Transcribed locus, weakly similar to NP_060312.1 hypothetical protein LOC55652 [Homo sapiens]	---	222288_at	0.3137	0.3257	0.2037	0.3902	0.2334	0.2669	0.0384	0.4889	0.5283	0.5422	0.4595	0.5711	0.3082	0.1036	0.0508	0.3253	0.321869	0.3105	0.3099	0.4525	0.2361	0.2422	0.243	0.3406	0.0701	0.3197	0.1039	0.1035	0.1542
chr3:71369201-71369719 (-) // 73.27 // p14.1	Transcribed locus	---	243291_at	0.3784	0.3157	0.2214	0.4368	0.3442	0.2202	-0.0448	0.4544	0.461	0.492	0.43	0.5093	0.3345	0.1608	0.1524	0.2806	0.321681	0.4071	0.406	0.4835	0.2839	0.2894	0.2902	0.5454	0.1242	0.4604	0.0589	0.0686	0.0709
chr8:120504377-120505859 (+) // 93.44 // q24.12	nephroblastoma overexpressed gene	NOV	214321_at	0.3818	0.3444	0.351	0.4684	0.4341	0.3008	0.075	0.3652	0.3795	0.3973	0.405	0.3838	0.3021	0.1049	0.092	0.3293	0.319663	0.3454	0.4451	0.5305	0.4595	0.4606	0.4628	0.4448	0.1295	0.4206	-0.0514	-0.0456	-0.0511
chr6:144074842-144189317 (+) // 97.44 // q24.2	phosphatase and actin regulator 2	PHACTR2	204048_s_at	0.3494	0.3069	0.3061	0.4152	0.4353	0.2745	0.1411	0.4279	0.3667	0.4069	0.3592	0.4024	0.3052	0.1272	0.1575	0.3214	0.318931	0.2311	0.3532	0.4519	0.409	0.4058	0.407	0.4447	0.1434	0.4048	-0.058	-0.0597	-0.0588
chr3:73514273-73756762 (-) // 97.75 // p13	PDZ domain containing RING finger 3	PDZRN3	212915_at	0.3971	0.4597	0.2694	0.3501	0.2616	0.2691	-0.0413	0.4754	0.4548	0.4891	0.4472	0.4787	0.2599	0.0552	0.0361	0.4361	0.318638	0.2382	0.2925	0.4636	0.2858	0.2895	0.2897	0.3004	0.0551	0.3018	-0.0116	-0.0134	0.0112
chr11:26972231-26974713 (+) // 96.34 // p14.2	fin bud initiation factor	FIBIN	226769_at	0.3752	0.3778	0.273	0.3876	0.2707	0.313	0.021	0.4211	0.4509	0.4376	0.4568	0.4276	0.2935	0.0784	0.0729	0.4409	0.318625	0.341	0.4216	0.5018	0.4225	0.4212	0.4216	0.34	0.0801	0.3516	0.0033	0.003	0.0099
chr15:69717535-69719249 (+) // 71.62 // q23	MRNA full length insert cDNA clone EUROIMAGE 980547	---	232855_at	0.4238	0.3469	0.3712	0.4126	0.419	0.2346	0.0265	0.394	0.3646	0.4017	0.3402	0.3892	0.3637	0.1486	0.1784	0.2703	0.317831	0.3291	0.4494	0.4675	0.4507	0.445	0.4466	0.4572	0.142	0.413	0.1537	0.1501	0.1843
chr8:38727855-38728326 (+) // 30.46 // p11.23	---	---	236936_at	0.3872	0.3919	0.365	0.397	0.368	0.2058	-0.0051	0.4165	0.3951	0.4008	0.4071	0.3798	0.3203	0.0968	0.1306	0.4151	0.316994	0.3897	0.4568	0.5312	0.3874	0.3947	0.3972	0.4668	0.1426	0.4876	-0.0436	-0.0425	-0.0347
chr10:96076052-96078139 (+) // 67.33 // q23.33	Phospholipase C, epsilon 1	PLCE1	214159_at	0.3723	0.3563	0.3005	0.4416	0.4215	0.2451	0.0461	0.3634	0.4106	0.3831	0.3751	0.3987	0.2728	0.2145	0.171	0.291	0.316475	0.3994	0.4158	0.4841	0.3678	0.3745	0.3743	0.3938	0.1213	0.3708	0.0079	0.0112	0.0134
chr14:60824967-60826762 (+) // 43.32 // q23.1	CDNA: FLJ21672 fis, clone COL09025	---	216770_at	0.3724	0.3575	0.2316	0.4002	0.3306	0.2521	0.1354	0.4194	0.4174	0.4287	0.3741	0.4346	0.3234	0.1685	0.1189	0.2967	0.316344	0.3706	0.356	0.4572	0.2794	0.2868	0.2869	0.415	0.1224	0.3949	0.0263	0.042	0.0483
chr1:202456971-202595667 (-) // 98.38 // q32.1	pleckstrin homology domain containing, family A member 6	PLEKHA6	205093_at	0.3913	0.3339	0.2915	0.4115	0.3753	0.2253	0.0522	0.3264	0.3776	0.3688	0.3808	0.3543	0.2704	0.3503	0.3281	0.2004	0.314881	0.3485	0.4368	0.4366	0.4137	0.4174	0.4148	0.4053	0.0924	0.4252	0.1654	0.1535	0.1683
chr2:19414727-19415561 (-) // 89.63 // p24.1	odd-skipped related 1 (Drosophila)	OSR1	228399_at	0.3105	0.3601	0.3707	0.479	0.4568	0.302	0.0981	0.3546	0.3753	0.3378	0.3744	0.3483	0.2728	0.1288	0.1287	0.3335	0.314463	0.2336	0.2408	0.4	0.2377	0.2415	0.2461	0.3442	0.0931	0.3303	-0.0247	-0.0138	-0.0283
chr4:72423680-72656663 (+) // 99.3 // q13.3	solute carrier family 4, sodium bicarbonate cotransporter, member 4	SLC4A4	203908_at	0.3772	0.3195	0.2759	0.4234	0.4212	0.2505	0.0283	0.3491	0.3789	0.3968	0.4095	0.3785	0.2458	0.2355	0.2112	0.3253	0.314163	0.3136	0.3859	0.4503	0.3584	0.361	0.3639	0.4713	0.1319	0.4876	-0.0231	-0.0245	-0.0162
chr5:15695969-15697413 (+) // 91.17 // p15.1	CDNA FLJ11923 fis, clone HEMBB1000341	---	233276_at	0.305	0.2583	0.2834	0.3119	0.2767	0.2179	-0.0194	0.5815	0.4574	0.508	0.4274	0.493	0.4132	0.0554	0.0995	0.3328	0.312625	0.2509	0.3089	0.3883	0.2781	0.2779	0.2794	0.3616	0.0938	0.3577	-0.0138	-0.0069	0.0029
chr3:113167996-113169522 (+) // 82.92 // q13.2	Pleckstrin homology-like domain, family B, member 2	PHLDB2	1557578_at	0.3191	0.3295	0.2747	0.4217	0.2948	0.2314	0.017	0.3972	0.432	0.4579	0.4338	0.4493	0.2621	0.1852	0.1378	0.3561	0.312475	0.3433	0.392	0.4687	0.2629	0.2661	0.2699	0.4727	0.1543	0.4852	-0.0262	-0.025	-0.0103
chr3:71283518-71285373 (-) // 51.36 // p14.1	CDNA FLJ12381 fis, clone MAMMA1002566	---	230415_at	0.3744	0.3135	0.2318	0.4306	0.3775	0.201	-0.0247	0.4033	0.4753	0.4884	0.4468	0.5033	0.2691	0.1359	0.0991	0.2737	0.312437	0.475	0.429	0.4939	0.2844	0.2864	0.2877	0.525	0.1863	0.4749	0.0621	0.0658	0.0898
chr5:125844272-125844852 (+) // 33.53 // q23.2	GRAM domain containing 3	GRAMD3	238049_at	0.3638	0.3202	0.3352	0.4262	0.3116	0.2379	-0.0471	0.4381	0.4073	0.4385	0.3791	0.4414	0.266	0.1952	0.1704	0.3096	0.312087	0.3063	0.3477	0.4754	0.3243	0.3251	0.3267	0.4362	0.1312	0.4273	0.0924	0.0862	0.142
chr13:92785306-92787757 (+) // 83.92 // q31.3	CDNA FLJ11419 fis, clone HEMBA1000985	---	233090_at	0.3436	0.3055	0.2876	0.4214	0.3381	0.2754	0.0038	0.4519	0.4239	0.4862	0.3927	0.4881	0.3142	0.0913	0.0767	0.2919	0.312019	0.3658	0.4023	0.4775	0.3281	0.3264	0.3312	0.3478	0.0698	0.3303	-0.0126	-0.0089	0.0057
chr3:45771955-45812966 (-) // 73.68 // p21.31	solute carrier family 6 (proline IMINO transporter), member 20	SLC6A20	219614_s_at	0.2993	0.2783	0.2926	0.391	0.3941	0.2991	0.0456	0.3809	0.3757	0.4076	0.3953	0.407	0.2802	0.2169	0.2001	0.3187	0.3114	0.2854	0.3301	0.4553	0.3292	0.333	0.3334	0.4489	0.1283	0.4041	0.0346	0.0329	0.0379
chr14:74034639-74035868 (-) // 27.34 // q24.3	latent transforming growth factor beta binding protein 2	LTBP2	223690_at	0.297	0.3128	0.2411	0.3602	0.3358	0.3855	0.0603	0.4626	0.4476	0.4444	0.4364	0.4526	0.3355	0.0761	0.0508	0.2819	0.311287	0.3038	0.3647	0.4927	0.3833	0.3874	0.3855	0.2827	0.0651	0.2801	0.0327	0.0394	0.0391
chr3:45775000-45788835 (-) // 95.19 // p21.31	solute carrier family 6 (proline IMINO transporter), member 20	SLC6A20	234291_s_at	0.3135	0.2624	0.3133	0.3773	0.4232	0.2881	0.1023	0.3746	0.338	0.4007	0.3847	0.3797	0.2833	0.2098	0.2234	0.3021	0.311025	0.2253	0.32	0.4122	0.3767	0.3775	0.3783	0.431	0.1205	0.4008	0.045	0.0424	0.0431
chr4:156873364-156874431 (+) // 93.18 // q32.1	CDNA clone IMAGE:5302158	---	229530_at	0.3761	0.3169	0.2807	0.4308	0.3374	0.231	-0.0213	0.4195	0.4114	0.4823	0.4077	0.4772	0.274	0.1115	0.0847	0.355	0.310931	0.2775	0.346	0.5073	0.3657	0.3689	0.3701	0.4587	0.1302	0.4449	0.0407	0.0385	0.0663
chr2:106048544-106061040 (+) // 99.87 // q12.2	chromosome 2 open reading frame 40	C2orf40	223623_at	0.4537	0.4223	0.3656	0.4224	0.3577	0.2223	-0.0123	0.3766	0.3549	0.3735	0.3516	0.3548	0.2717	0.1474	0.1767	0.3356	0.310906	0.2751	0.3776	0.4569	0.4158	0.4202	0.4202	0.3353	0.089	0.3194	0.0314	0.0292	0.0419
chr2:241680531-241683655 (+) // 93.73 // q37.3	sushi, nidogen and EGF-like domains 1	SNED1	213493_at	0.3234	0.3408	0.2344	0.3768	0.3316	0.2649	0.0102	0.4373	0.4841	0.4586	0.4629	0.4689	0.311	0.0759	0.0518	0.3325	0.310319	0.4177	0.3634	0.4485	0.2453	0.2565	0.256	0.3403	0.1738	0.3536	-0.0118	-0.0011	-0.0138
chr1:65867047-65868643 (+) // 39.07 // p31.3	leptin receptor	LEPR	1556919_at	0.3711	0.3523	0.2161	0.4352	0.3342	0.2517	-0.0216	0.416	0.5037	0.4475	0.4472	0.4761	0.2738	0.1252	0.0948	0.2387	0.310125	1	0.7786	0.6595	0.4767	0.4854	0.4876	0.3856	0.0984	0.4195	-0.0235	-0.0117	-0.0301
chr8:42393498-42449308 (-) // 99.87 // p11.21	solute carrier family 20 (phosphate transporter), member 2	SLC20A2	202744_at	0.421	0.4556	0.3098	0.4116	0.3337	0.3816	0.0697	0.2578	0.315	0.2955	0.3472	0.2849	0.2244	0.3385	0.2884	0.2231	0.309862	0.2675	0.3163	0.377	0.3266	0.3311	0.3337	0.3173	0.1247	0.3496	0.0567	0.0543	0.0246
chr2:206133743-206136623 (+) // 92.92 // q33.3	CDNA FLJ33986 fis, clone DFNES2005779	---	233450_at	0.3257	0.3038	0.2265	0.3651	0.2606	0.1838	-0.0827	0.4798	0.4511	0.4884	0.414	0.5096	0.3638	0.1927	0.1823	0.2931	0.30985	0.3645	0.3748	0.4846	0.2766	0.2796	0.2807	0.3607	0.047	0.3011	0.1009	0.1082	0.1488
chr2:219432789-219447192 (+) // 93.89 // q35	wingless-type MMTV integration site family, member 6	WNT6	221609_s_at	0.2789	0.2482	0.2411	0.3939	0.4143	0.309	0.1264	0.3546	0.3808	0.3984	0.412	0.3916	0.3096	0.1832	0.1485	0.3636	0.309631	0.151	0.156	0.315	0.164	0.1678	0.169	0.3621	0.0982	0.3737	-0.0156	-0.0048	-0.0178
chr1:181486427-181487046 (-) // 84.68 // q25.3	nicotinamide nucleotide adenylyltransferase 2	NMNAT2	1556029_s_at	0.369	0.367	0.3123	0.4179	0.3978	0.3383	0.0405	0.3673	0.391	0.3832	0.4051	0.3611	0.2962	0.0994	0.097	0.3081	0.30945	0.3569	0.4782	0.5045	0.551	0.558	0.5536	0.3551	0.1069	0.3646	-0.0427	-0.0271	-0.0527
chr13:101167198-101168266 (+) // 79.02 // q33.1	Integrin, beta-like 1 (with EGF-like repeat domains)	ITGBL1	1557079_at	0.3409	0.3235	0.3344	0.4029	0.3756	0.3586	0.0808	0.3686	0.3733	0.3641	0.3971	0.3609	0.3576	0.0987	0.1048	0.3094	0.30945	0.2745	0.3615	0.4387	0.3961	0.3963	0.3963	0.3708	0.1146	0.3536	-0.0242	-0.0179	-0.0254
chr8:27511160-27513313 (-) // 95.79 // p21.1	clusterin	CLU	222043_at	0.3586	0.3605	0.3612	0.4314	0.3753	0.2409	-0.0228	0.4183	0.4158	0.4251	0.4105	0.4131	0.2684	0.0354	0.0396	0.4078	0.308694	0.3426	0.4401	0.5441	0.4283	0.434	0.4351	0.3534	0.0777	0.3409	-0.0674	-0.0618	-0.0593
chr3:73669645-73671493 (-) // 60.73 // p13	CDNA FLJ12196 fis, clone MAMMA1000867	---	233442_at	0.3127	0.2706	0.2372	0.336	0.2502	0.1814	-0.0308	0.5891	0.4683	0.5396	0.4426	0.539	0.3345	0.064	0.0837	0.3158	0.308369	0.303	0.3146	0.4247	0.2237	0.2261	0.2262	0.3378	0.0764	0.3164	-0.0068	0.0031	0.0148
chr9:88753432-88806272 (+) // 25.64 // q21.33	Homo sapiens, clone IMAGE:5309572, mRNA	---	1556936_at	0.3204	0.3017	0.2657	0.3693	0.3371	0.2359	-0.0001	0.3885	0.4035	0.4446	0.4394	0.4437	0.284	0.1627	0.1623	0.3607	0.307462	0.3027	0.3637	0.4715	0.3441	0.3504	0.3513	0.4029	0.146	0.4223	0.0757	0.0782	0.0951
chr3:71711447-71711976 (-) // 80.9 // p14.1	Transcribed locus	---	238712_at	0.3675	0.3171	0.273	0.4256	0.364	0.2505	-0.0144	0.3889	0.4491	0.4536	0.4322	0.4572	0.2638	0.1255	0.0974	0.2573	0.306769	0.4022	0.436	0.4846	0.3206	0.3237	0.3233	0.5061	0.311	0.4997	0.0428	0.0399	0.0684
chr8:69406013-69610616 (+) // 94.86 // q13.2	---	---	1562301_at	0.3888	0.3396	0.3128	0.433	0.3661	0.2706	0.0562	0.3517	0.3586	0.3756	0.3946	0.3622	0.2924	0.1366	0.1304	0.3362	0.306587	0.3076	0.4044	0.4714	0.3763	0.3755	0.3794	0.5005	0.1584	0.4926	-0.0346	-0.031	-0.0353
chr14:54238610-54329780 (+) // 97.07 // q22.2	sterile alpha motif domain containing 4A	SAMD4A	212845_at	0.4335	0.483	0.2507	0.3724	0.3337	0.3025	0.0724	0.3812	0.4075	0.4023	0.4132	0.3855	0.2694	0.025	0.0061	0.3611	0.306219	0.3396	0.4058	0.4898	0.3731	0.3773	0.3782	0.365	0.1138	0.4069	-0.1284	-0.1172	-0.1362
chr10:95745366-95745763 (+) // 93.85 // q23.33	Transcribed locus	---	239904_at	0.3988	0.3836	0.3263	0.46	0.39	0.2499	0.0488	0.3457	0.4161	0.3909	0.4055	0.3949	0.2547	0.0982	0.0867	0.2436	0.305856	0.3568	0.3842	0.4492	0.3242	0.3321	0.3318	0.544	0.1614	0.5117	-0.0441	-0.0361	-0.0389
chr13:101167198-101168266 (+) // 79.02 // q33.1	integrin, beta-like 1 (with EGF-like repeat domains)	ITGBL1	1557080_s_at	0.3406	0.331	0.3244	0.3774	0.3736	0.4427	0.1389	0.355	0.3432	0.3544	0.365	0.3445	0.3177	0.0793	0.0902	0.2957	0.3046	0.2137	0.3393	0.4412	0.4192	0.417	0.4187	0.3279	0.0935	0.296	-0.0139	-0.0098	-0.0139
chr8:120497881-120505386 (+) // 98.18 // q24.12	nephroblastoma overexpressed gene	NOV	204501_at	0.3712	0.3275	0.331	0.4394	0.4316	0.286	0.0848	0.3422	0.3496	0.3721	0.3964	0.3484	0.2985	0.0953	0.0924	0.3004	0.304175	0.302	0.434	0.499	0.4915	0.4918	0.4948	0.4045	0.1216	0.3995	-0.0466	-0.0407	-0.049
chr10:77853804-77854461 (+) // 72.73 // q22.3	Transcribed locus	---	240772_at	0.3777	0.3235	0.3041	0.3907	0.3543	0.2355	0.0146	0.3881	0.3524	0.4141	0.3471	0.4134	0.3223	0.1299	0.1233	0.3719	0.303931	0.2618	0.3512	0.4682	0.3123	0.3107	0.3123	0.4771	0.1455	0.4155	0.0016	0.006	0.0147
chr2:217245072-217249124 (-) // 95.63 // q35	insulin-like growth factor binding protein 5	IGFBP5	211958_at	0.3498	0.3529	0.2986	0.3599	0.3174	0.2411	0.0158	0.4821	0.4462	0.4218	0.4246	0.414	0.3202	0.0484	0.0754	0.2931	0.303831	0.3146	0.3901	0.475	0.4634	0.4658	0.4674	0.301	0.0729	0.3216	-0.0194	-0.0147	-0.0251
chr9:99326242-99402259 (+) // 89.1 // q22.33	tropomodulin 1	TMOD1	203661_s_at	0.4039	0.3966	0.2682	0.3803	0.4048	0.2303	0.0953	0.3769	0.3923	0.3994	0.4135	0.3884	0.2842	0.0694	0.0717	0.2787	0.303369	0.3075	0.3773	0.4249	0.3516	0.357	0.3598	0.4011	0.1166	0.4085	-0.0549	-0.0382	-0.056
chr15:27828656-27829268 (-) // 60.78 // q13.1	Transcribed locus	---	244476_at	0.2738	0.2345	0.3072	0.3936	0.2873	0.2287	-0.0301	0.4494	0.3983	0.436	0.3562	0.4433	0.2681	0.2271	0.2478	0.329	0.303138	0.3182	0.3334	0.4336	0.2358	0.239	0.2442	0.3874	0.0552	0.3669	0.0384	0.0418	0.0601
chr1:148511821-148519951 (+) // 96.92 // q21.2	chromosome 1 open reading frame 54	C1orf54	219506_at	0.3774	0.3492	0.2563	0.3665	0.3631	0.2554	0.0073	0.4118	0.4072	0.4239	0.4068	0.4205	0.2982	0.0302	0.0277	0.4316	0.302069	0.2267	0.2956	0.4128	0.3291	0.3334	0.3344	0.3955	0.1349	0.4018	-0.0407	-0.0368	-0.0324
chr6:1569040-1569757 (-) // 100.0 // p25.3	GDP-mannose 4,6-dehydratase	GMDS	214106_s_at	0.3178	0.2935	0.4429	0.476	0.3198	0.2005	0.0244	0.2448	0.3044	0.2914	0.2962	0.2857	0.205	0.4888	0.4439	0.1809	0.301	0.2333	0.3005	0.3302	0.3068	0.3073	0.308	0.3457	0.0603	0.3299	0.1571	0.1265	0.1503
chr2:183406981-183439593 (-) // 98.69 // q32.1	frizzled-related protein	FRZB	203697_at	0.3256	0.3136	0.3595	0.4165	0.3574	0.2357	0.0058	0.3852	0.3529	0.4024	0.3563	0.39	0.2323	0.15	0.1604	0.3646	0.300513	0.2284	0.3188	0.4682	0.3812	0.3835	0.3836	0.3557	0.0911	0.3247	-0.0068	-0.008	0.005
chr7:90731718-90736068 (+) // 97.72 // q21.13	frizzled homolog 1 (Drosophila)	FZD1	204451_at	0.3233	0.2867	0.2362	0.395	0.2565	0.3003	0.0074	0.4047	0.415	0.4591	0.4127	0.4506	0.2751	0.1341	0.1055	0.3167	0.298681	0.2279	0.2801	0.3669	0.2697	0.2732	0.2747	0.3438	0.0821	0.3702	0.0836	0.079	0.1154
chr2:160496607-160506665 (-) // 98.55 // q24.2	phospholipase A2 receptor 1, 180kDa	PLA2R1	235746_s_at	0.305	0.3288	0.4638	0.4012	0.2592	0.1982	-0.0016	0.3878	0.3917	0.4022	0.3778	0.3945	0.2698	0.1689	0.1552	0.2724	0.298431	0.2125	0.281	0.3736	0.2358	0.2397	0.2403	0.2883	0.0703	0.2729	0.0137	0.0137	0.0432
chr12:27679176-27692336 (+) // 99.68 // p11.23 /// chr12:27167442-27179560 (+) // 91.8 // p11.23	PTPRF interacting protein, binding protein 1 (liprin beta 1)	PPFIBP1	214374_s_at	0.2792	0.2554	0.3979	0.3777	0.3682	0.2726	0.0972	0.4293	0.3445	0.3536	0.2981	0.3626	0.3517	0.1186	0.1674	0.2938	0.297987	0.1207	0.2076	0.3384	0.2555	0.2574	0.2624	0.3777	0.1026	0.317	-0.0203	-0.0146	0.0067
chr10:34438494-35144217 (-) // 95.9 // p11.22	par-3 partitioning defective 3 homolog (C. elegans)	PARD3	221527_s_at	0.3442	0.3654	0.2794	0.381	0.2632	0.2342	0.0725	0.3787	0.3881	0.4023	0.3668	0.4013	0.2301	0.2088	0.1925	0.2564	0.297806	0.1855	0.2421	0.3571	0.2374	0.2389	0.2412	0.3122	0.0545	0.3055	0.0334	0.0317	0.0557
chr10:30343771-30357407 (-) // 95.36 // p11.23	KIAA1462	KIAA1462	231841_s_at	0.336	0.3527	0.2633	0.3528	0.3544	0.3463	0.0606	0.382	0.4011	0.3968	0.4107	0.3909	0.3097	0.0392	0.0293	0.3327	0.297406	0.2984	0.3665	0.4576	0.3743	0.3793	0.3817	0.3119	0.0699	0.2961	-0.0499	-0.0484	-0.0514
chr12:27568362-27739993 (+) // 84.28 // p11.23	PTPRF interacting protein, binding protein 1 (liprin beta 1)	PPFIBP1	203735_x_at	0.2709	0.3011	0.2756	0.3765	0.2793	0.3385	0.137	0.3634	0.3755	0.3981	0.3714	0.394	0.2862	0.1653	0.1048	0.3066	0.296513	0.1473	0.2211	0.3634	0.2391	0.241	0.2454	0.2904	0.1384	0.2979	0.0157	0.0216	0.0299
chr10:125496001-125506793 (-) // 99.86 // q26.13	carboxypeptidase X (M14 family), member 2	CPXM2	236144_at	0.3281	0.2931	0.3257	0.3688	0.3609	0.223	0.0288	0.4461	0.4014	0.4244	0.3816	0.4076	0.3216	0.0621	0.0913	0.276	0.296281	0.2729	0.4276	0.4649	0.5065	0.5075	0.5025	0.2815	0.0658	0.2663	0.003	0.0051	0.0009
chr11:103283130-103539971 (-) // 98.93 // q22.3	platelet derived growth factor D	PDGFD	219304_s_at	0.3305	0.3194	0.2431	0.3587	0.3234	0.2089	0.0254	0.4136	0.4334	0.4364	0.4401	0.4299	0.2862	0.0816	0.0703	0.3299	0.295675	0.3681	0.4266	0.4881	0.3642	0.3692	0.371	0.3785	0.1046	0.3817	-0.023	-0.0237	-0.0137
chr2:206191819-206193129 (+) // 97.75 // q33.3	par-3 partitioning defective 3 homolog B (C. elegans)	PARD3B	228411_at	0.3317	0.391	0.2217	0.3401	0.2291	0.2125	-0.0759	0.4301	0.4439	0.4553	0.4048	0.4501	0.2509	0.126	0.1072	0.4038	0.295144	0.2943	0.3396	0.5068	0.326	0.3252	0.3274	0.2594	0.0245	0.2544	0.0366	0.0313	0.0541
chr11:65390874-65396793 (-) // 97.01 // q13.1	EGF-containing fibulin-like extracellular matrix protein 2	EFEMP2	209356_x_at	0.318	0.333	0.2335	0.309	0.3625	0.4573	0.1505	0.4182	0.3904	0.4034	0.3611	0.3958	0.2748	-0.0119	0.0067	0.3151	0.294838	0.1641	0.2392	0.3624	0.2773	0.2767	0.2795	0.2242	0.0277	0.2196	-0.0053	-0.0043	-0.0035
chr1:144236346-144255224 (+) // 99.56 // q21.1	integrin, alpha 10	ITGA10	206766_at	0.2905	0.2843	0.3135	0.4106	0.3351	0.3106	0.0533	0.3696	0.3895	0.3791	0.4138	0.3786	0.306	0.1162	0.1077	0.2332	0.293225	0.2646	0.2998	0.3333	0.2312	0.2362	0.2409	0.3353	0.0929	0.3517	-0.0387	-0.0302	-0.0424
chr2:160511109-160627367 (-) // 98.49 // q24.2	phospholipase A2 receptor 1, 180kDa	PLA2R1	207415_at	0.2901	0.2819	0.2843	0.3588	0.2773	0.2317	0.0569	0.3497	0.3738	0.3769	0.414	0.3616	0.3334	0.2151	0.21	0.2559	0.291963	0.1404	0.2232	0.3207	0.2418	0.2452	0.2469	0.3237	0.1186	0.355	0.0353	0.0392	0.0434
chr2:241643805-241644562 (+) // 29.34 // q37.3	---	---	235743_at	0.3735	0.3682	0.3864	0.3429	0.385	0.2218	-0.0139	0.3725	0.3442	0.3408	0.3312	0.3252	0.3374	0.0738	0.1103	0.3652	0.291531	0.2497	0.3864	0.4464	0.3865	0.3932	0.391	0.478	0.2019	0.4362	-0.029	-0.0274	-0.0273
chr17:43464013-43464684 (-) // 79.44 // q21.32	coatomer protein complex, subunit zeta 2	COPZ2	235897_at	0.3484	0.4095	0.314	0.3451	0.4022	0.2708	0.1677	0.3239	0.3417	0.3314	0.3105	0.3212	0.2529	0.0701	0.0854	0.3629	0.291106	0.2536	0.3143	0.4312	0.3404	0.3478	0.3456	0.2455	0.0108	0.2445	-0.0225	-0.0006	-0.0271
chr11:26974671-26975210 (+) // 73.76 // p14.2	fin bud initiation factor	FIBIN	231001_at	0.3303	0.3466	0.2167	0.3761	0.2454	0.2918	0.0163	0.3624	0.4421	0.396	0.4527	0.3912	0.2571	0.0886	0.0667	0.366	0.290375	0.4042	0.4417	0.5056	0.3837	0.3866	0.386	0.331	0.0862	0.3507	-0.0119	-0.0075	-0.0087
---	CDNA clone IMAGE:6050863	---	1559814_at	0.3463	0.3098	0.2753	0.4125	0.3416	0.2208	0.0537	0.3728	0.4064	0.402	0.359	0.4107	0.2904	0.0857	0.073	0.2733	0.289581	0.4269	0.4041	0.4493	0.2908	0.2914	0.2958	0.4176	0.1148	0.433	-0.01	-0.003	0.0025
chr4:122176233-122178186 (-) // 96.16 // q27	chromosome 4 open reading frame 31	C4orf31	219747_at	0.3874	0.3435	0.2824	0.362	0.3454	0.2675	0.0444	0.3287	0.3372	0.3458	0.3476	0.3326	0.263	0.1865	0.1777	0.2755	0.2892	0.2863	0.3694	0.4098	0.3532	0.3585	0.3629	0.3182	0.0781	0.2962	0.0821	0.0812	0.0948
chr2:217245072-217249124 (-) // 95.63 // q35	insulin-like growth factor binding protein 5	IGFBP5	211959_at	0.3295	0.3897	0.2733	0.3123	0.2314	0.187	-0.0031	0.4814	0.4452	0.4294	0.3735	0.4289	0.2675	0.0423	0.0612	0.3648	0.288394	0.2825	0.3075	0.444	0.3095	0.3156	0.316	0.2618	0.0418	0.2664	0.0269	0.0308	0.0541
chr19:11135946-11137906 (-) // 82.5 // p13.2	KN motif and ankyrin repeat domains 2	KANK2	218418_s_at	0.2566	0.2873	0.1958	0.2578	0.2182	0.2536	0.0067	0.5249	0.4625	0.4853	0.4172	0.4904	0.3092	0.0404	0.0376	0.3695	0.288313	0.1651	0.2082	0.3618	0.2029	0.2091	0.212	0.197	0	0.1977	-0.0043	0.0016	0.0201
chr17:38831910-38833834 (+) // 99.19 // q21.31	ADP-ribosylation factor-like 4D	ARL4D	203586_s_at	0.3081	0.3024	0.3169	0.3931	0.3609	0.2862	0.167	0.3196	0.298	0.2967	0.3094	0.2942	0.2621	0.2475	0.2853	0.164	0.288212	0.2775	0.3643	0.393	0.3726	0.3806	0.3812	0.2674	0.035	0.2809	0.0783	0.0832	0.0433
chr15:27807692-27809025 (-) // 81.03 // q13.1	MRNA full length insert cDNA clone EUROIMAGE 295344	---	215428_at	0.275	0.2086	0.2735	0.3644	0.272	0.2156	0.0206	0.4349	0.3487	0.4031	0.3192	0.4034	0.3065	0.2117	0.2497	0.2976	0.287781	0.2632	0.3197	0.3848	0.2499	0.2533	0.2569	0.4074	0.0806	0.3669	0.0419	0.0506	0.0665
chr11:65390494-65396793 (-) // 92.32 // q13.1	EGF-containing fibulin-like extracellular matrix protein 2	EFEMP2	206580_s_at	0.2952	0.3401	0.2544	0.3099	0.2888	0.409	0.126	0.4156	0.4045	0.4171	0.3512	0.4211	0.2528	-0.0023	-0.0038	0.3151	0.287169	0.168	0.2194	0.3645	0.2397	0.2416	0.2438	0.2132	0.0277	0.2019	0.0247	0.0258	0.059
chr15:27868621-27869076 (-) // 55.68 // q13.1	---	---	243184_at	0.2808	0.2289	0.2597	0.3694	0.2619	0.2057	-0.0704	0.4144	0.3684	0.4378	0.3383	0.4422	0.2386	0.2464	0.2493	0.3213	0.287044	0.292	0.3192	0.4221	0.234	0.2356	0.2404	0.3879	0.0517	0.3572	0.0817	0.0779	0.1201
chr11:44909537-44910550 (+) // 97.02 // p11.2	Tetraspanin 18	TSPAN18	227307_at	0.3005	0.289	0.2354	0.384	0.3693	0.2167	-0.042	0.442	0.4571	0.4446	0.4157	0.4535	0.2859	0.0127	0.0077	0.3132	0.286581	0.3957	0.4111	0.5156	0.4018	0.4048	0.4059	0.3367	0.0939	0.319	-0.0682	-0.061	-0.0773
chr8:27817805-27906121 (-) // 90.99 // p21.1	scavenger receptor class A, member 5 (putative)	SCARA5	1554705_at	0.3656	0.3267	0.2679	0.345	0.4151	0.242	0.241	0.3056	0.3221	0.3331	0.3376	0.3137	0.2645	0.1197	0.1276	0.2574	0.286538	0.212	0.3374	0.3772	0.3689	0.3703	0.3697	0.4297	0.1476	0.4389	-0.0592	-0.0508	-0.0537
chr10:30341735-30344190 (-) // 92.82 // p11.23	KIAA1462	KIAA1462	213316_at	0.305	0.3241	0.2549	0.3571	0.3193	0.2806	0.0683	0.4022	0.4298	0.4224	0.3838	0.4273	0.2582	0.0148	-0.0005	0.3307	0.286125	0.3195	0.3618	0.4685	0.3202	0.3263	0.3285	0.3071	0.0605	0.2864	-0.0573	-0.0535	-0.0467
chr1:29435737-29525768 (+) // 99.14 // p35.3	protein tyrosine phosphatase, receptor type, U	PTPRU	211320_s_at	0.3371	0.3538	0.2618	0.4229	0.3007	0.2739	0.0347	0.3023	0.3546	0.3064	0.3493	0.3197	0.2427	0.2284	0.2839	0.1948	0.285438	0.3654	0.3505	0.387	0.2842	0.2925	0.2942	0.2447	0.0052	0.2523	0.2581	0.2495	0.1503
chr13:101169307-101171207 (+) // 92.08 // q33.1	Integrin, beta-like 1 (with EGF-like repeat domains)	ITGBL1	231993_at	0.3229	0.3198	0.2856	0.3639	0.3243	0.4188	0.1534	0.3286	0.3143	0.345	0.3366	0.3318	0.278	0.0761	0.0737	0.2918	0.285288	0.1835	0.2971	0.4107	0.3657	0.3619	0.3633	0.2977	0.0867	0.2736	-0.0122	-0.0095	-0.0085
chr15:68733948-68734526 (-) // 98.13 // q23	uveal autoantigen with coiled-coil domains and ankyrin repeats	UACA	238868_at	0.3239	0.4089	0.2254	0.3473	0.2383	0.2679	0.0829	0.3512	0.4356	0.3774	0.4052	0.3779	0.2335	0.0798	0.0343	0.3718	0.285081	0.2829	0.3217	0.4308	0.2766	0.2779	0.2794	0.2657	0.0629	0.2617	-0.0268	-0.0243	-0.0109
chr17:64043418-64044031 (-) // 78.46 // q24.2	family with sequence similarity 20, member A	FAM20A	242945_at	0.2813	0.2423	0.2242	0.3551	0.2483	0.2048	-0.0139	0.4184	0.468	0.4611	0.4714	0.4688	0.3142	0.1238	0.1004	0.1902	0.2849	0.3806	0.3661	0.3726	0.2436	0.2506	0.2553	0.3591	0.0914	0.3932	0.1212	0.131	0.1482
chr2:172087232-172122883 (+) // 92.15 // q31.1	cytochrome b reductase 1	CYBRD1	222453_at	0.3098	0.352	0.2345	0.2942	0.2308	0.2187	-0.0582	0.4433	0.4116	0.4626	0.389	0.4442	0.2242	0.0666	0.0582	0.4768	0.284894	0.2203	0.2788	0.4863	0.2891	0.2949	0.2949	0.2616	0.0393	0.2655	0.0729	0.0677	0.1038
chr7:15609982-15610418 (-) // 94.56 // p21.1	Transcribed locus	---	244203_at	0.3888	0.355	0.2024	0.3055	0.3129	0.2459	0.0523	0.2982	0.3098	0.3496	0.3188	0.3365	0.1867	0.109	0.0912	0.6943	0.284806	0.1589	0.1991	0.361	0.2263	0.2277	0.2287	0.3134	0.1029	0.3118	-0.0292	-0.0266	-0.0253
chr11:837196-857109 (+) // 96.69 // p15.5	tetraspanin 4	TSPAN4	209263_x_at	0.2841	0.3268	0.2202	0.3095	0.3243	0.3888	0.1177	0.3874	0.3682	0.3749	0.3682	0.3757	0.3145	0.0287	0.0071	0.3592	0.284706	0.1677	0.2063	0.3687	0.2226	0.2247	0.2275	0.2048	0.0027	0.203	-0.0372	-0.0292	-0.039
chr1:12597314-12597965 (-) // 95.8 // p36.22	Transcribed locus	---	238032_at	0.3504	0.3146	0.2418	0.3692	0.2768	0.1847	-0.038	0.4146	0.4078	0.4217	0.3433	0.436	0.2504	0.1482	0.1377	0.2943	0.284594	0.4738	0.4608	0.5113	0.3287	0.3345	0.3327	0.4027	0.1022	0.3449	0.0325	0.0334	0.0566
chr1:236710285-236710887 (-) // 34.72 // q43	hypothetical LOC339535	LOC339535	235599_at	0.3029	0.295	0.274	0.3791	0.3044	0.2741	0.0278	0.3512	0.3664	0.383	0.4067	0.3802	0.2933	0.1257	0.091	0.2953	0.284381	0.1678	0.2212	0.3182	0.244	0.2484	0.2492	0.3564	0.0986	0.3783	0.0351	0.0476	0.0576
chr15:27779647-27901998 (-) // 90.2 // q13.1	tight junction protein 1 (zona occludens 1)	TJP1	202011_at	0.2374	0.251	0.2486	0.357	0.2286	0.2699	0.0641	0.3872	0.3657	0.3729	0.3493	0.3748	0.2496	0.2678	0.2227	0.3016	0.284262	0.2147	0.2605	0.3533	0.2239	0.229	0.2328	0.2421	0.0016	0.2524	0.0414	0.0485	0.0682
chr8:37819086-37821378 (+) // 94.35 // p12	G protein-coupled receptor 124	GPR124	65718_at	0.27	0.329	0.1972	0.3108	0.259	0.2705	0.0013	0.4252	0.4567	0.4245	0.4187	0.4343	0.2704	0.0368	0.0247	0.4157	0.28405	0.2458	0.2327	0.4191	0.2096	0.2165	0.2173	0.2368	0.0523	0.245	-0.042	-0.0333	-0.0326
chr5:76621562-76623491 (+) // 94.46 // q14.1 /// chr5:125908447-125958798 (-) // 97.14 // q23.2	aldehyde dehydrogenase 7 family, member A1	ALDH7A1	208950_s_at	0.3502	0.3529	0.2624	0.3766	0.2489	0.3543	0.1068	0.3016	0.3019	0.3234	0.3261	0.311	0.223	0.2106	0.1531	0.3296	0.283275	0.2011	0.3045	0.4038	0.3519	0.3528	0.3533	0.2771	0.0387	0.2996	0.0317	0.0265	0.039
chr14:51541277-51605462 (-) // 98.36 // q22.1	nidogen 2 (osteonidogen)	NID2	204114_at	0.3072	0.3121	0.2388	0.317	0.294	0.3088	0.0844	0.395	0.3716	0.4115	0.3505	0.4058	0.3063	0.0593	0.05	0.3167	0.283062	0.1359	0.2117	0.3383	0.2747	0.2756	0.2787	0.2493	0.0576	0.2488	0.0146	0.014	0.0341
chr7:137210264-137217779 (-) // 95.79 // q33	cAMP responsive element binding protein 3-like 2	CREB3L2	212345_s_at	0.2447	0.2415	0.2759	0.3739	0.286	0.2807	0.0155	0.4295	0.3926	0.4211	0.3679	0.4308	0.2811	0.1027	0.0921	0.2901	0.282881	0.1783	0.2029	0.3472	0.2045	0.2075	0.2109	0.2826	0.0862	0.2846	0.0505	0.0434	0.0617
chr4:120407983-120413918 (+) // 76.38 // q26	ubiquitin specific peptidase 53	USP53	216775_at	0.3175	0.2742	0.2093	0.3584	0.2113	0.2462	0.0195	0.4057	0.369	0.4187	0.3551	0.4208	0.2484	0.188	0.1726	0.3018	0.282281	0.3794	0.4207	0.4828	0.3501	0.3545	0.3548	0.4613	0.1378	0.4229	0.0269	0.0279	0.0405
chr7:19007936-19008564 (+) // 97.21 // p21.1	Transcribed locus	---	230968_at	0.3765	0.3847	0.3454	0.4279	0.305	0.2233	0.0553	0.3343	0.3687	0.3697	0.3662	0.3653	0.2411	0.0471	0.0229	0.2825	0.282244	0.4051	0.5236	0.5631	0.5244	0.5218	0.5194	0.3074	0.1222	0.2833	-0.0741	-0.0686	-0.074
chr4:148621579-148685555 (+) // 98.91 // q31.23	endothelin receptor type A	EDNRA	204463_s_at	0.3161	0.2662	0.2681	0.3355	0.2959	0.2189	-0.0024	0.4616	0.3618	0.4305	0.3532	0.4218	0.2765	0.0824	0.0897	0.3348	0.281913	0.1899	0.2711	0.4165	0.3513	0.3531	0.3543	0.2881	0.0727	0.2609	0.0132	0.0151	0.0291
chr3:73528892-73530655 (-) // 65.16 // p13	CDNA FLJ11571 fis, clone HEMBA1003328	---	216130_at	0.2818	0.2307	0.2306	0.3241	0.2851	0.1986	-0.0222	0.4864	0.397	0.4386	0.37	0.4344	0.3784	0.0889	0.1262	0.2547	0.281456	0.3036	0.3128	0.3639	0.2702	0.2717	0.2712	0.3362	0.0544	0.3209	0.0049	0.0273	0.0017
chr3:71091051-71625348 (-) // 98.6 // p14.1	forkhead box P1	FOXP1	223287_s_at	0.3153	0.2351	0.263	0.3315	0.3598	0.2408	-0.0109	0.3992	0.3507	0.4227	0.3485	0.4134	0.2585	0.1712	0.1925	0.1992	0.280656	0.2478	0.335	0.382	0.3448	0.3468	0.3474	0.3824	0.1273	0.3487	0.0921	0.0799	0.1186
chr22:23766547-23912399 (+) // 80.67 // q11.23	KIAA1671 protein	CTA-221G9.4	1563478_at	0.2806	0.2392	0.2149	0.3573	0.2331	0.1697	-0.0311	0.3547	0.4045	0.4057	0.4135	0.4181	0.32	0.2596	0.2429	0.2019	0.280287	0.253	0.2428	0.3215	0.1528	0.1542	0.157	0.3297	0.0629	0.2931	0.1289	0.1375	0.171
chr19:16864757-16998450 (-) // 96.6 // p13.11	C3 and PZP-like, alpha-2-macroglobulin domain containing 8	CPAMD8	227721_at	0.3176	0.2881	0.2659	0.3796	0.3452	0.1803	0.0373	0.3589	0.4091	0.3696	0.3801	0.3846	0.271	0.1239	0.1181	0.2442	0.279594	0.3861	0.3586	0.3747	0.2213	0.2312	0.234	0.376	0.078	0.3618	0.0628	0.07	0.0832
chr21:32735670-32736842 (+) // 63.44 // q22.11	EST from clone 79282, full insert	---	1559063_at	0.2884	0.2582	0.2116	0.3514	0.1911	0.1516	-0.0856	0.4812	0.4261	0.4639	0.4222	0.4702	0.2751	0.1615	0.158	0.2456	0.279406	0.3947	0.3618	0.4113	0.1947	0.2028	0.2044	0.3733	0.0876	0.378	0.113	0.1198	0.139
chr4:148621579-148685555 (+) // 99.24 // q31.23	endothelin receptor type A	EDNRA	204464_s_at	0.2925	0.2779	0.2523	0.3207	0.2636	0.2245	-0.0249	0.4472	0.4045	0.4415	0.3752	0.4285	0.2505	0.09	0.0769	0.3468	0.279231	0.1782	0.2402	0.409	0.3251	0.3255	0.3266	0.2285	0.0491	0.2283	0.0393	0.0388	0.0606
chr17:64042852-64043308 (-) // 97.44 // q24.2	family with sequence similarity 20, member A	FAM20A	241981_at	0.2769	0.2593	0.2733	0.3433	0.2763	0.2219	0.004	0.3718	0.4295	0.4088	0.4467	0.4081	0.2858	0.1261	0.1039	0.2109	0.277913	0.3356	0.3667	0.3728	0.2704	0.2729	0.2768	0.3837	0.1188	0.416	0.0596	0.0646	0.0814
chr1:181487270-181540632 (-) // 94.27 // q25.3	nicotinamide nucleotide adenylyltransferase 2	NMNAT2	1552712_a_at	0.3429	0.3311	0.3422	0.3941	0.3693	0.2506	-0.0185	0.3227	0.3313	0.3253	0.3569	0.3169	0.2724	0.0867	0.0848	0.3002	0.275556	0.3059	0.4219	0.478	0.4214	0.4252	0.4212	0.3821	0.1072	0.3429	-0.0651	-0.0607	-0.0708
chr17:7732893-7756246 (+) // 98.45 // p13.1	chromodomain helicase DNA binding protein 3	CHD3	208807_s_at	0.2671	0.2347	0.181	0.352	0.2987	0.2569	-0.0324	0.4128	0.4443	0.4113	0.4252	0.4329	0.322	0.1094	0.1086	0.176	0.275031	0.2634	0.232	0.3	0.178	0.1852	0.1853	0.3352	0.1386	0.3351	0.1678	0.1576	0.1419
chr5:125786975-125858270 (+) // 90.7 // q23.2	GRAM domain containing 3	GRAMD3	218706_s_at	0.3069	0.2794	0.2509	0.3664	0.2929	0.3473	0.0288	0.305	0.3168	0.3355	0.3341	0.3242	0.1846	0.2592	0.2225	0.2448	0.274956	0.2227	0.2979	0.4076	0.3608	0.3586	0.3617	0.3135	0.0693	0.3302	0.0974	0.0841	0.101
chr15:71382904-71384599 (+) // 98.32 // q24.1	neogenin homolog 1 (chicken)	NEO1	225270_at	0.3083	0.2812	0.2563	0.3654	0.2703	0.1966	-0.0789	0.3458	0.3546	0.3748	0.3398	0.3786	0.1944	0.2849	0.2599	0.257	0.274312	0.2409	0.2599	0.3442	0.2265	0.2304	0.232	0.3423	0.0387	0.3326	0.1157	0.1021	0.1472
chr12:29548953-29549756 (-) // 99.75 // p11.22	transmembrane and tetratricopeptide repeat containing 1	TMTC1	244506_at	0.3463	0.3227	0.281	0.3558	0.3439	0.2649	0.1058	0.3195	0.3362	0.32	0.368	0.3069	0.2918	0.0801	0.0958	0.2496	0.274269	0.2399	0.4113	0.4214	0.5723	0.5831	0.5816	0.3223	0.0947	0.3564	-0.0282	-0.0159	-0.0379
chr2:205313777-205314189 (+) // 99.76 // q33.2	---	---	244586_x_at	0.2895	0.2948	0.2073	0.3609	0.2499	0.1971	-0.0167	0.387	0.4184	0.3973	0.368	0.4414	0.2906	0.1559	0.1024	0.2408	0.274038	0.3762	0.3867	0.4728	0.2175	0.2211	0.2199	0.4145	0.1114	0.3116	0.0012	0.0027	0.0316
chr3:113086178-113150576 (+) // 99.06 // q13.2	pleckstrin homology-like domain, family B, member 2	PHLDB2	238419_at	0.2851	0.2691	0.3598	0.3479	0.3668	0.333	0.1875	0.2823	0.2763	0.2555	0.263	0.2351	0.3271	0.1658	0.1983	0.2311	0.273981	0.1266	0.2882	0.3305	0.3967	0.3996	0.4028	0.3784	0.1403	0.369	-0.0669	-0.0623	-0.0721
chr11:110978822-110982884 (+) // 79.09 // q23.1	MRNA; cDNA DKFZp547O0210 (from clone DKFZp547O0210)	---	1557459_at	0.3212	0.3376	0.261	0.3634	0.2207	0.1626	-0.0672	0.4272	0.3876	0.4198	0.3964	0.4126	0.2338	0.0681	0.0465	0.3698	0.272569	0.3791	0.3749	0.5215	0.3259	0.3252	0.3274	0.4231	0.228	0.4292	-0.0514	-0.0501	-0.0448
chr2:241659493-241663745 (+) // 80.95 // q37.3	---	---	1559421_at	0.2981	0.2611	0.2274	0.3049	0.3101	0.2047	0.0465	0.425	0.384	0.4073	0.3913	0.3922	0.4015	0.0184	0.0555	0.2225	0.271906	0.3736	0.3924	0.3588	0.3224	0.3276	0.3296	0.3315	0.0978	0.3553	-0.0246	-0.0048	-0.0327
chr13:92913152-92913536 (+) // 97.7 // q31.3	---	---	243865_x_at	0.3617	0.3157	0.3539	0.3786	0.4131	0.1968	0.0789	0.319	0.2971	0.3013	0.2533	0.3016	0.3389	0.0897	0.122	0.2262	0.271738	0.2725	0.3732	0.3861	0.3525	0.3455	0.3474	0.3512	0.1091	0.2843	-0.0126	-0.0054	0.0074
chr20:12937846-12978784 (+) // 38.95 // p12.1	serine palmitoyltransferase, long chain base subunit 3	SPTLC3	220456_at	0.3295	0.3102	0.3795	0.3417	0.39	0.2064	0.1871	0.2767	0.2787	0.2772	0.2797	0.2553	0.2638	0.128	0.1658	0.2715	0.271319	0.1731	0.2796	0.3156	0.277	0.2741	0.2753	0.4294	0.1812	0.4615	-0.0058	-0.0012	0.0116
chr11:121472115-121473598 (-) // 99.93 // q24.1	CDNA FLJ38472 fis, clone FEBRA2022148	---	233364_s_at	0.2785	0.2621	0.2779	0.3341	0.2779	0.3058	0.0113	0.4299	0.3669	0.4131	0.3567	0.4082	0.2831	0.0266	0.0341	0.2662	0.270775	0.2023	0.2363	0.318	0.2233	0.2243	0.2256	0.2558	0.0395	0.2509	-0.0598	-0.0532	-0.0528
chr14:74036210-74148787 (-) // 99.49 // q24.3	latent transforming growth factor beta binding protein 2	LTBP2	204682_at	0.2464	0.2575	0.2091	0.2904	0.2863	0.379	0.0857	0.4193	0.3933	0.3917	0.3698	0.4028	0.3019	0.0467	0.0306	0.2138	0.270269	0.2432	0.3149	0.4116	0.3432	0.3477	0.3457	0.2081	0.0389	0.2016	0.0538	0.0587	0.0708
chr16:63538185-63713428 (-) // 99.67 // q21	cadherin 11, type 2, OB-cadherin (osteoblast)	CDH11	207173_x_at	0.2503	0.2425	0.18	0.2832	0.2544	0.3377	0.0752	0.4279	0.4104	0.4434	0.3787	0.4487	0.2986	0.0419	0.0243	0.2268	0.27025	0.1511	0.2149	0.3197	0.2642	0.2653	0.267	0.2083	0.0236	0.2229	0.1137	0.1081	0.143
chr14:54104386-54329056 (+) // 99.62 // q22.2	sterile alpha motif domain containing 4A	SAMD4A	215120_s_at	0.355	0.3627	0.2409	0.32	0.4052	0.3132	0.1714	0.296	0.3303	0.2913	0.3664	0.2777	0.2982	0.03	0.0488	0.2142	0.270081	0.2603	0.3555	0.3711	0.4454	0.4455	0.4506	0.3294	0.1181	0.4028	-0.0996	-0.0852	-0.1193
chr10:78382318-78386891 (+) // 87.8 // q22.3	CDNA clone IMAGE:4794289	---	1561962_at	0.3167	0.2887	0.1129	0.3521	0.2087	0.2053	0.0296	0.3972	0.4195	0.4391	0.4499	0.4603	0.2674	0.1147	0.0682	0.1884	0.269919	0.411	0.4117	0.4063	0.334	0.3325	0.3385	0.3431	0.1006	0.3754	-0.0012	0.0061	0.0008
chr12:5542080-5925659 (-) // 98.71 // p13.31	transmembrane protein 16B	TMEM16B	220111_s_at	0.3763	0.3273	0.2592	0.3611	0.4095	0.2381	0.0622	0.296	0.3032	0.3237	0.3111	0.309	0.2479	0.0959	0.0864	0.3098	0.269794	0.2483	0.286	0.3843	0.3222	0.3297	0.3292	0.3509	0.104	0.3653	-0.029	-0.0204	-0.0295
chr4:148628059-148629004 (+) // 100.0 // q31.23	CDNA FLJ41174 fis, clone BRACE2042398	---	243555_at	0.3377	0.3014	0.3365	0.3885	0.3947	0.3312	0.1034	0.2695	0.2461	0.2774	0.261	0.2607	0.2234	0.1328	0.1334	0.3178	0.269719	0.1088	0.1626	0.3086	0.2608	0.2623	0.2648	0.3249	0.1139	0.3464	-0.013	-0.0062	-0.0055
chr3:43049140-43074146 (+) // 79.28 // p22.1	hypothetical protein LOC729085	LOC729085	232124_at	0.2729	0.267	0.274	0.3929	0.2921	0.2213	-0.009	0.3459	0.4135	0.3903	0.4123	0.383	0.2572	0.0744	0.0669	0.2486	0.268956	0.3296	0.3928	0.4426	0.3962	0.3995	0.4006	0.3319	0.083	0.3404	0.084	0.0837	0.1033
chr2:241651467-241675548 (+) // 95.87 // q37.3	sushi, nidogen and EGF-like domains 1	SNED1	1554798_at	0.2641	0.2483	0.1832	0.2939	0.3505	0.2605	0.1026	0.3942	0.4014	0.3777	0.4174	0.364	0.3512	0.0336	0.0751	0.185	0.268919	0.3361	0.3463	0.3187	0.3114	0.3228	0.3225	0.2312	0.0251	0.2682	-0.0205	0.0021	-0.058
chr17:58057515-58058604 (-) // 73.92 // q23.2	Homo sapiens, clone IMAGE:4344825, mRNA	---	244788_at	0.2551	0.2479	0.2365	0.2786	0.2385	0.2788	0.0694	0.4519	0.3782	0.411	0.369	0.4056	0.3006	0.0371	0.0611	0.2783	0.2686	0.1615	0.2135	0.3165	0.2182	0.2201	0.2208	0.2539	0.0527	0.2449	-0.034	-0.0249	-0.014
chr3:73099383-73107313 (+) // 93.46 // p13	glycosyltransferase 8 domain containing 4	GLT8D4	235371_at	0.2803	0.2372	0.1677	0.2888	0.2106	0.2398	0.0311	0.4483	0.3886	0.4871	0.3604	0.4905	0.2841	0.0685	0.0662	0.2434	0.268288	0.1636	0.225	0.3215	0.2445	0.2461	0.2466	0.265	0.0403	0.2463	0.1319	0.1255	0.1576
chr1:47288449-47289009 (+) // 72.54 // p33	cytochrome P450, family 4, subfamily X, polypeptide 1	CYP4X1	227702_at	0.3458	0.331	0.2523	0.3547	0.2657	0.1906	-0.0594	0.3248	0.3545	0.3733	0.3532	0.3613	0.2182	0.1698	0.1777	0.2756	0.268069	0.3078	0.4052	0.4578	0.3954	0.3999	0.3971	0.3133	0.067	0.293	0.3267	0.3087	0.3271
chr3:71087424-71090524 (-) // 95.97 // p14.1	forkhead box P1	FOXP1	224837_at	0.2703	0.2372	0.2471	0.3428	0.3488	0.1842	-0.0322	0.3719	0.3964	0.3948	0.3621	0.3989	0.2427	0.1543	0.1413	0.2249	0.267844	0.3019	0.3335	0.4144	0.2885	0.2924	0.2923	0.4292	0.141	0.3651	0.0259	0.0149	0.0513
chr8:118877793-118880434 (-) // 98.61 // q24.11	exostoses (multiple) 1	EXT1	214985_at	0.3049	0.2961	0.288	0.3552	0.318	0.3028	0.1171	0.3395	0.3135	0.3233	0.2817	0.317	0.3068	0.1014	0.117	0.202	0.267769	0.2103	0.3388	0.395	0.4117	0.4072	0.4049	0.2734	0.0772	0.2292	-0.035	-0.0313	-0.0213
chr17:64044483-64062549 (-) // 99.77 // q24.2	family with sequence similarity 20, member A	FAM20A	226804_at	0.2825	0.2454	0.267	0.3474	0.2717	0.1913	0.0019	0.3652	0.4183	0.4117	0.4159	0.4099	0.2783	0.1019	0.0891	0.1827	0.267512	0.3374	0.3591	0.3799	0.2764	0.2818	0.2867	0.3443	0.0896	0.3774	0.1251	0.1292	0.146
chr9:94318710-94338158 (-) // 99.65 // q22.31	extracellular matrix protein 2, female organ and adipocyte specific	ECM2	1568779_a_at	0.2761	0.3228	0.2436	0.3076	0.2684	0.1835	-0.006	0.3937	0.3869	0.4025	0.3395	0.3897	0.259	0.0263	0.0499	0.4339	0.267338	0.239	0.3112	0.4759	0.3112	0.3185	0.3209	0.301	0.0465	0.2969	-0.014	0.0014	-0.0116
chr21:16024214-16174248 (+) // 98.39 // q21.1	ubiquitin specific peptidase 25	USP25	223167_s_at	0.3465	0.3741	0.2711	0.3518	0.3218	0.2012	-0.0573	0.3302	0.3493	0.3642	0.3612	0.3509	0.2449	0.0869	0.0407	0.3396	0.267319	0.2686	0.3478	0.4607	0.3903	0.3895	0.3879	0.4538	0.2033	0.4316	-0.1135	-0.1135	-0.1131
chr8:37807397-37821375 (+) // 97.37 // p12	G protein-coupled receptor 124	GPR124	221814_at	0.2766	0.3132	0.1837	0.2701	0.2533	0.2366	-0.0424	0.434	0.4123	0.4069	0.3692	0.4061	0.2755	0.0085	0.0365	0.4333	0.267088	0.2092	0.2144	0.3869	0.2224	0.2301	0.2317	0.2069	0.015	0.2175	-0.0269	-0.0232	-0.0326
chr2:219180875-219210148 (+) // 99.04 // q35	phospholipase C, delta 4	PLCD4	224505_s_at	0.4909	0.5648	0.2192	0.3084	0.3033	0.1855	0.0526	0.2804	0.3317	0.3018	0.3103	0.2994	0.2281	0.0626	0.0656	0.2617	0.266644	0.2887	0.3209	0.3483	0.2616	0.2665	0.2653	0.3304	0.1061	0.3276	-0.0499	-0.0331	-0.0574
chr10:60258964-60261202 (+) // 95.55 // q21.1	bicaudal C homolog 1 (Drosophila)	BICC1	213429_at	0.2661	0.3031	0.2189	0.3521	0.2485	0.3458	0.1399	0.3435	0.3685	0.3609	0.3592	0.3559	0.2767	0.0664	0.0232	0.2352	0.266494	0.1838	0.2411	0.351	0.2696	0.2699	0.2726	0.2071	0.0403	0.2154	0.0013	0.0008	0.0153
chr2:182740911-183095710 (-) // 97.26 // q32.1	phosphodiesterase 1A, calmodulin-dependent	PDE1A	208396_s_at	0.3041	0.2937	0.2692	0.377	0.295	0.2244	0.0071	0.3479	0.3341	0.3703	0.3621	0.3631	0.2462	0.0805	0.0859	0.2991	0.266231	0.2731	0.3429	0.4219	0.3428	0.3455	0.3452	0.3551	0.0913	0.327	-0.0405	-0.0351	-0.0298
chr15:78858790-79028564 (+) // 99.08 // q25.1	KIAA1199	KIAA1199	1554685_a_at	0.2813	0.2582	0.3129	0.3172	0.4344	0.3348	0.168	0.2618	0.2489	0.2733	0.2815	0.2438	0.2602	0.1309	0.1704	0.2712	0.26555	0.0932	0.179	0.3024	0.3229	0.3253	0.3311	0.3198	0.1033	0.3302	-0.0387	-0.0329	-0.0516
chr12:41138866-41145328 (-) // 99.05 // q12	prickle homolog 1 (Drosophila)	PRICKLE1	226065_at	0.2702	0.2322	0.2426	0.3691	0.3344	0.2097	0.0165	0.4304	0.377	0.4099	0.3511	0.4225	0.292	0.0133	0.0249	0.2525	0.265519	0.231	0.2895	0.3847	0.2917	0.2925	0.2937	0.3024	0.062	0.2894	0.0083	0.0093	0.0194
chr17:68676960-68678465 (+) // 100.0 // q25.1	somatostatin receptor 2	SSTR2	217455_s_at	0.3345	0.2698	0.3089	0.3407	0.4834	0.2741	0.0848	0.2736	0.2528	0.2934	0.3004	0.2703	0.2472	0.0917	0.1301	0.2894	0.265319	0.1758	0.2623	0.3211	0.2857	0.2921	0.2941	0.431	0.1243	0.4456	-0.0546	-0.0471	-0.0626
chr10:18849518-18965807 (+) // 41.24 // p12.33	calcium channel, voltage-dependent, beta 2 subunit	CACNB2	1559419_at	0.2502	0.2274	0.2488	0.3419	0.293	0.1862	-0.0495	0.4169	0.4145	0.4079	0.4169	0.4124	0.2745	0.0953	0.0945	0.2127	0.265225	0.3999	0.346	0.3714	0.2077	0.2128	0.2138	0.3816	0.0986	0.3754	-0.0501	-0.0365	-0.0475
chr4:156857818-156872180 (+) // 98.88 // q32.1	guanylate cyclase 1, soluble, alpha 3	GUCY1A3	221942_s_at	0.3232	0.2573	0.2689	0.3778	0.3506	0.1648	0.0324	0.3687	0.3371	0.3902	0.3363	0.3835	0.2367	0.0542	0.0695	0.2922	0.265213	0.2469	0.3302	0.4241	0.3509	0.3543	0.3545	0.3988	0.1084	0.3934	0.0054	0.0098	0.0168
chr2:217248630-217268517 (-) // 93.44 // q35	insulin-like growth factor binding protein 5	IGFBP5	203424_s_at	0.3926	0.4204	0.3954	0.2999	0.3436	0.194	0.0537	0.3419	0.2715	0.2801	0.2531	0.2456	0.2715	0.0315	0.0973	0.343	0.264694	0.1321	0.3545	0.418	0.4982	0.5014	0.4992	0.3217	0.1013	0.2821	-0.0492	-0.0517	-0.047
chr4:120397042-120435403 (+) // 98.5 // q26	ubiquitin specific peptidase 53	USP53	231817_at	0.2599	0.3109	0.2089	0.31	0.2144	0.2587	0.07	0.2862	0.3522	0.3211	0.3676	0.315	0.2045	0.2801	0.1906	0.2813	0.264462	0.2676	0.324	0.4258	0.3275	0.329	0.3304	0.3209	0.187	0.34	0.0438	0.0384	0.0565
chr10:60142271-60144637 (+) // 63.12 // q21.1	CDNA FLJ11739 fis, clone HEMBA1005497	---	233607_at	0.2655	0.2614	0.1926	0.3852	0.2271	0.1962	-0.0267	0.4066	0.4067	0.4393	0.3726	0.4571	0.2557	0.082	0.0424	0.2532	0.263556	0.3163	0.3025	0.3947	0.2034	0.2073	0.2098	0.2765	0.0511	0.2688	0.0435	0.0439	0.0724
chr9:88749098-88751905 (-) // 89.93 // q21.33	growth arrest-specific 1	GAS1	204456_s_at	0.2842	0.258	0.2845	0.3173	0.3593	0.2502	0.0625	0.3347	0.3118	0.3249	0.3619	0.2991	0.2782	0.0893	0.123	0.2715	0.26315	0.1587	0.2805	0.3449	0.4115	0.4149	0.4138	0.3012	0.0945	0.3596	-0.0066	-0.008	-0.0269
chr10:60223300-60244080 (+) // 97.08 // q21.1	bicaudal C homolog 1 (Drosophila)	BICC1	220580_at	0.2856	0.2595	0.2428	0.3533	0.2622	0.2519	0.0341	0.3982	0.3412	0.391	0.3281	0.3839	0.2966	0.0803	0.0799	0.2194	0.263	0.2675	0.3096	0.3538	0.2922	0.2886	0.2913	0.2629	0.0456	0.2594	0.0103	0.0174	0.0157
chr5:76621562-76623491 (+) // 94.46 // q14.1 /// chr5:125908447-125958798 (-) // 97.14 // q23.2	aldehyde dehydrogenase 7 family, member A1	ALDH7A1	208951_at	0.3399	0.3264	0.2526	0.3476	0.2563	0.3456	0.1156	0.2695	0.2562	0.2889	0.2956	0.2694	0.2064	0.1832	0.1465	0.3033	0.262688	0.1641	0.2898	0.3651	0.3669	0.3661	0.3669	0.2593	0.0333	0.2859	0.0194	0.0128	0.016
chr13:19694101-19695622 (-) // 98.64 // q12.11	gap junction protein, beta 6, 30kDa	GJB6	231771_at	0.2415	0.2117	0.2433	0.3249	0.3141	0.2017	0.0191	0.2674	0.2754	0.2973	0.2961	0.2892	0.2318	0.3782	0.3896	0.2169	0.262387	0.2115	0.2455	0.2936	0.2199	0.2228	0.2261	0.3287	0.0927	0.3188	-0.0399	-0.0196	-0.044
chr3:101950871-102048083 (-) // 98.58 // q12.2	ABI gene family, member 3 (NESH) binding protein	ABI3BP	223395_at	0.2401	0.2664	0.2442	0.3284	0.2563	0.2057	-0.0205	0.4072	0.3652	0.4018	0.3369	0.4015	0.257	0.0611	0.0583	0.3825	0.262006	0.237	0.3119	0.4755	0.3567	0.3591	0.3592	0.2028	0.0247	0.1888	-0.0297	-0.0297	-0.0203
chr17:43480695-43493906 (+) // 96.61 // q21.32	nuclear factor (erythroid-derived 2)-like 1	NFE2L1	200758_s_at	0.3825	0.424	0.1887	0.2946	0.3262	0.2517	0.0671	0.3313	0.3204	0.3091	0.3094	0.3052	0.2223	0.0741	0.1008	0.2806	0.26175	0.2014	0.2287	0.3369	0.2531	0.2576	0.2597	0.2292	0.0004	0.2587	-0.0394	-0.0353	-0.0749
chr13:99432319-99437019 (+) // 88.4 // q32.3	Zic family member 2 (odd-paired homolog, Drosophila)	ZIC2	223642_at	0.2715	0.2852	0.2777	0.4281	0.3156	0.3062	0.0611	0.2833	0.3333	0.318	0.3768	0.3178	0.2402	0.0823	0.0484	0.235	0.261281	0.2155	0.262	0.3405	0.2633	0.2648	0.2663	0.3313	0.0802	0.3349	-0.0913	-0.0848	-0.1032
chr10:18849518-18965807 (+) // 41.24 // p12.33	calcium channel, voltage-dependent, beta 2 subunit	CACNB2	1559420_x_at	0.2463	0.2184	0.2022	0.3257	0.2788	0.2014	-0.0163	0.3899	0.4059	0.4113	0.4396	0.4137	0.2502	0.1018	0.0856	0.2167	0.2607	0.3982	0.3502	0.3716	0.2004	0.2033	0.2043	0.3872	0.1541	0.3976	-0.0501	-0.0392	-0.0475
chr1:47670395-47672900 (-) // 99.05 // p33	hypothetical protein MGC12982	MGC12982	224456_s_at	0.2368	0.2742	0.2341	0.3807	0.2952	0.2985	0.0619	0.2625	0.3585	0.2817	0.3518	0.3029	0.2893	0.2001	0.1381	0.1997	0.260375	0.3274	0.2957	0.3482	0.2376	0.2441	0.2433	0.3395	0.1295	0.3251	-0.0716	-0.0534	-0.0927
chr9:123110469-123112102 (+) // 37.13 // q33.2	---	---	1564525_at	0.3266	0.3019	0.2345	0.3084	0.2416	0.1541	-0.0356	0.3911	0.3579	0.3856	0.3325	0.3762	0.2249	0.0763	0.0906	0.3983	0.260306	0.4363	0.4213	0.4799	0.302	0.3015	0.3029	0.355	0.0734	0.3534	-0.0244	-0.0198	-0.0135
chr1:12550526-12599993 (-) // 98.07 // p36.22	dehydrogenase/reductase (SDR family) member 3	DHRS3	202481_at	0.3666	0.4043	0.2428	0.3177	0.2576	0.1587	-0.0343	0.2827	0.3065	0.3004	0.2548	0.2925	0.1623	0.2518	0.2421	0.3386	0.259069	0.3378	0.3907	0.4927	0.3555	0.3623	0.3618	0.2695	0.0529	0.2457	0.1255	0.1116	0.1222
chr15:86323212-86600394 (-) // 93.62 // q25.3	neurotrophic tyrosine kinase, receptor, type 3	NTRK3	215025_at	0.3046	0.2534	0.2678	0.37	0.3905	0.2242	0.0768	0.2994	0.3139	0.3117	0.3535	0.3037	0.239	0.0662	0.0847	0.2778	0.258575	0.2838	0.3531	0.384	0.3117	0.3137	0.3164	0.3412	0.0831	0.3439	-0.0621	-0.0454	-0.0708
chr2:121465925-121466545 (+) // 82.0 // q14.2	GLI-Kruppel family member GLI2	GLI2	228537_at	0.2534	0.2526	0.1495	0.2531	0.1991	0.3642	0.1271	0.3979	0.3633	0.3639	0.3425	0.3789	0.3239	0.0343	0.0416	0.2763	0.2576	0.1472	0.147	0.2076	0.1175	0.1222	0.1237	0.1341	-0.0095	0.1393	-0.0334	-0.019	-0.0196
chr8:69893341-69893810 (+) // 96.7 // q13.2	chromosome 8 open reading frame 34	C8orf34	231380_at	0.3702	0.343	0.2727	0.3389	0.2785	0.2226	0.0221	0.3084	0.3055	0.326	0.2865	0.3079	0.2386	0.1063	0.1107	0.2803	0.257387	0.2336	0.3376	0.4065	0.3643	0.3665	0.3684	0.4212	0.1301	0.3907	0.0233	0.0189	0.0358
chr3:49133551-49145555 (-) // 98.38 // p21.31	laminin, beta 2 (laminin S)	LAMB2	216264_s_at	0.288	0.3305	0.2434	0.2903	0.2457	0.2499	-0.0011	0.3956	0.3588	0.3722	0.297	0.3692	0.2124	0.0211	0.0299	0.4134	0.257269	0.1766	0.2161	0.3937	0.2217	0.2233	0.2248	0.1849	-0.0016	0.1794	0.1096	0.1052	0.1194
chr12:45038238-45052823 (-) // 98.54 // q13.11	solute carrier family 38, member 2	SLC38A2	222982_x_at	0.2438	0.2604	0.2305	0.3441	0.2646	0.3656	0.1212	0.3005	0.3121	0.3177	0.3167	0.3175	0.2262	0.1829	0.1117	0.1959	0.256962	0.1888	0.2542	0.3609	0.2697	0.2706	0.275	0.2585	0.0647	0.27	-0.0723	-0.0659	-0.0635
chr9:103277429-103289296 (-) // 98.91 // q31.1	chromosome 9 open reading frame 125	C9orf125	224458_at	0.3252	0.2807	0.261	0.3531	0.3136	0.2886	0.0671	0.2334	0.2391	0.2628	0.2605	0.2423	0.1654	0.2861	0.2677	0.2605	0.256694	0.1683	0.238	0.2937	0.2692	0.2658	0.2704	0.3162	0.0511	0.3175	-0.0423	-0.0459	-0.048
chr6:1859390-1861124 (-) // 81.21 // p25.3	CDNA FLJ12129 fis, clone MAMMA1000198	---	234113_at	0.2632	0.2151	0.3003	0.3737	0.2708	0.1265	0.0285	0.2771	0.3222	0.3114	0.297	0.3121	0.2147	0.3125	0.3149	0.1668	0.256675	0.3104	0.3167	0.3054	0.2296	0.2285	0.2307	0.3108	0.037	0.3197	0.11	0.1093	0.1244
chr4:96356218-96689380 (-) // 97.58 // q22.3	unc-5 homolog C (C. elegans)	UNC5C	1555342_a_at	0.249	0.1995	0.2891	0.3101	0.3691	0.2056	0.1641	0.2937	0.3118	0.2982	0.3479	0.2717	0.3589	0.1231	0.1632	0.1496	0.256538	0.1491	0.285	0.2525	0.3723	0.3771	0.3756	0.2998	0.0467	0.3161	-0.0324	-0.0126	-0.0487
chr13:48780786-48873649 (-) // 99.39 // q14.2	calcium binding protein 39-like	CAB39L	225915_at	0.3583	0.3376	0.317	0.3209	0.3283	0.1852	-0.0495	0.3173	0.2949	0.3331	0.3151	0.3073	0.2116	0.0831	0.1015	0.3416	0.256456	0.2226	0.3709	0.4511	0.4385	0.4385	0.44	0.3263	0.071	0.3029	-0.0694	-0.0735	-0.076
chr16:4322260-4329597 (+) // 93.59 // p13.3	GLIS family zinc finger 2	GLIS2	223378_at	0.2544	0.2521	0.2337	0.3479	0.243	0.2844	0.0445	0.3645	0.3563	0.3862	0.3169	0.3972	0.2629	0.061	0.0271	0.2576	0.255606	0.1925	0.2222	0.3303	0.2413	0.2417	0.2437	0.1745	-0.0137	0.1746	0.1127	0.1121	0.1464
chr5:81318900-81320211 (+) // 43.28 // q14.2	ATG10 autophagy related 10 homolog (S. cerevisiae)	ATG10	1559820_at	0.3164	0.2912	0.2047	0.3691	0.263	0.1444	-0.149	0.3722	0.4176	0.4001	0.3585	0.4309	0.2533	0.0944	0.0803	0.2351	0.255137	0.4838	0.4003	0.4691	0.2498	0.2564	0.2565	0.4053	0.064	0.3549	0.0264	0.0431	0.0363
chr7:150757989-150768032 (-) // 96.78 // q36.1	crystallin, gamma N	CRYGN	1553082_at	0.3302	0.2509	0.2323	0.3026	0.4079	0.2001	0.1577	0.2918	0.2712	0.3047	0.2985	0.287	0.2409	0.1234	0.1371	0.2432	0.254969	0.2115	0.2812	0.2962	0.2176	0.2181	0.219	0.3874	0.1211	0.3747	-0.0291	-0.0182	-0.0225
chr9:18899819-18900293 (+) // 97.33 // p22.1	ADAMTS-like 1	ADAMTSL1	239909_at	0.2385	0.2509	0.1752	0.2574	0.3785	0.4935	0.2575	0.315	0.3266	0.2997	0.3139	0.3016	0.2696	0.0084	0.0002	0.1874	0.254619	0.2122	0.2383	0.3003	0.241	0.2428	0.2441	0.2127	0.07	0.2241	-0.0686	-0.0554	-0.0715
chr16:63538926-63596427 (-) // 99.89 // q21	cadherin 11, type 2, OB-cadherin (osteoblast)	CDH11	207172_s_at	0.2423	0.2158	0.1992	0.2744	0.2817	0.3358	0.1063	0.4135	0.352	0.3845	0.3321	0.3823	0.3298	0.0101	0.0255	0.188	0.254581	0.1052	0.1956	0.2774	0.2957	0.2961	0.2969	0.2019	0.0342	0.2123	0.0573	0.0537	0.0612
chr2:153147734-153150683 (+) // 75.27 // q23.3	Full length insert cDNA clone YB31B05	---	1556656_at	0.2806	0.2285	0.2292	0.3529	0.2103	0.1912	-0.0848	0.4091	0.3704	0.4316	0.3533	0.4342	0.2675	0.078	0.0624	0.2579	0.254519	0.3416	0.3259	0.3839	0.2477	0.2505	0.253	0.359	0.0683	0.3549	-0.0065	0.0015	0.0132
chr18:40510916-40512853 (-) // 63.04 // q12.3	CDNA clone IMAGE:5287047	---	1569785_at	0.3016	0.3135	0.2734	0.345	0.2846	0.1894	-0.018	0.3339	0.3684	0.3598	0.3416	0.346	0.271	0.0343	0.0345	0.287	0.254125	0.252	0.3198	0.4332	0.3827	0.3825	0.3823	0.254	0.0478	0.2488	-0.0181	-0.0129	-0.0193
chr15:68736326-68741089 (-) // 71.89 // q23	uveal autoantigen with coiled-coil domains and ankyrin repeats	UACA	1558356_at	0.2757	0.2678	0.2283	0.285	0.2307	0.1685	0.0024	0.3677	0.3455	0.3917	0.3117	0.3824	0.2564	0.1144	0.1024	0.3322	0.253925	0.2385	0.3061	0.3683	0.275	0.2694	0.2743	0.2913	0.0693	0.294	0.0818	0.0756	0.1158
chr8:92038155-92039025 (-) // 84.87 // q21.3	Transcribed locus	---	235759_at	0.2614	0.3036	0.2348	0.3251	0.21	0.3075	0.0052	0.3764	0.3848	0.3752	0.4035	0.372	0.2208	-0.0157	-0.0187	0.3061	0.25325	0.2133	0.2666	0.3938	0.2718	0.2764	0.2752	0.3102	0.0896	0.3151	-0.1441	-0.1409	-0.1528
chr16:5034123-5055889 (-) // 94.62 // p13.3	hypothetical protein MGC45438	MGC45438	229177_at	0.3732	0.347	0.2963	0.3709	0.3149	0.1864	0.0056	0.2864	0.2886	0.2969	0.3027	0.2932	0.1996	0.1142	0.1136	0.2614	0.253181	0.2676	0.3638	0.4362	0.3585	0.3627	0.361	0.3121	0.0713	0.2784	0.1494	0.148	0.1588
chr1_random:200841-203290 (+) // 75.82 // /// chr1:1277934-1283776 (-) // 96.98 // p36.33	matrix-remodelling associated 8	MXRA8	213422_s_at	0.2538	0.3009	0.1733	0.2364	0.2315	0.3329	0.0189	0.4177	0.3948	0.3893	0.3392	0.397	0.2415	0.0096	0.0175	0.2957	0.253125	0.2461	0.2643	0.3822	0.2498	0.2574	0.2587	0.1487	-0.0088	0.1491	0.0782	0.0764	0.0909
chr3:58129222-58132937 (+) // 99.55 // p14.3	filamin B, beta (actin binding protein 278)	FLNB	208614_s_at	0.243	0.212	0.2091	0.3098	0.2951	0.2214	-0.0039	0.3014	0.2901	0.3175	0.2725	0.316	0.218	0.3598	0.3061	0.1815	0.253087	0.2008	0.2328	0.3191	0.2397	0.2416	0.244	0.2335	0.0132	0.2326	0.1842	0.1682	0.2152
chr6:55823877-55825591 (-) // 91.3 // p12.1	CDNA FLJ11424 fis, clone HEMBA1001026	---	233606_at	0.304	0.2807	0.279	0.3765	0.3151	0.2106	-0.0234	0.2759	0.3003	0.3026	0.2674	0.3079	0.261	0.1341	0.1363	0.316	0.25275	0.1917	0.1868	0.3094	0.1635	0.1694	0.1696	0.3861	0.0783	0.3822	0.0126	0.0275	0.0084
chr16:71377644-71378357 (-) // 91.5 // q22.3	zinc finger homeobox 3	ZFHX3	242738_s_at	0.3731	0.3595	0.2047	0.324	0.25	0.1495	-0.0148	0.3356	0.3402	0.3496	0.2929	0.361	0.163	0.0996	0.0708	0.3784	0.252319	0.3344	0.3152	0.3849	0.2395	0.244	0.2446	0.2609	0.0422	0.2417	0.0493	0.0495	0.0793
chr17:50697525-50755887 (+) // 97.1 // q22	hepatic leukemia factor	HLF	204755_x_at	0.3043	0.2749	0.279	0.3483	0.2833	0.1986	-0.0401	0.3337	0.3482	0.3541	0.3691	0.3402	0.2377	0.0547	0.0651	0.2631	0.250887	0.2891	0.4041	0.4704	0.4006	0.402	0.4053	0.4	0.1082	0.403	-0.09	-0.0854	-0.0959
chr10:49895979-49896849 (-) // 84.75 // q11.22	Chromosome 10 open reading frame 72	C10orf72	235471_at	0.2232	0.2384	0.2131	0.2908	0.2746	0.2646	0.0473	0.3612	0.3805	0.3649	0.3716	0.3641	0.2741	0.0348	0.0334	0.2774	0.250875	0.1717	0.1916	0.3218	0.2265	0.2321	0.2333	0.2937	0.0704	0.3227	-0.05	-0.0389	-0.037
chr2:182796834-182815032 (-) // 95.16 // q32.1	phosphodiesterase 1A, calmodulin-dependent	PDE1A	1558680_s_at	0.3067	0.2703	0.3069	0.3705	0.3249	0.234	0.0861	0.2996	0.2483	0.3122	0.3078	0.2826	0.2495	0.0591	0.0921	0.2608	0.250712	0.1513	0.3043	0.3531	0.4231	0.4203	0.4207	0.3422	0.1008	0.3371	-0.0554	-0.0498	-0.0599
chr10:105348193-105474109 (-) // 96.34 // q24.33	SH3 and PX domains 2A	SH3PXD2A	213252_at	0.2555	0.2153	0.2098	0.2782	0.26	0.2354	0.0958	0.3682	0.3028	0.3253	0.2682	0.3402	0.1985	0.2075	0.2533	0.1879	0.250119	0.2053	0.2006	0.2894	0.1631	0.1665	0.1687	0.2491	0.05	0.2335	0.0378	0.0405	0.0258
chr8:17469405-17472300 (+) // 84.56 // p22	solute carrier family 7 (cationic amino acid transporter, y+ system), member 2	SLC7A2	225516_at	0.3595	0.3504	0.2331	0.3332	0.3107	0.1825	-0.0113	0.3043	0.3096	0.3209	0.3318	0.3123	0.2277	0.0874	0.0781	0.2705	0.250044	0.295	0.3789	0.4421	0.3439	0.3475	0.3524	0.3239	0.0688	0.3356	0.1163	0.1159	0.1372
chr4:148621537-148683295 (+) // 98.76 // q31.23	endothelin receptor type A	EDNRA	216235_s_at	0.2779	0.2283	0.2544	0.2948	0.2954	0.2129	0.0358	0.3889	0.3076	0.353	0.3021	0.3386	0.2715	0.057	0.0882	0.2908	0.249825	0.1333	0.2255	0.3309	0.3549	0.3526	0.3549	0.2169	0.0531	0.2107	0.01	0.013	0.011
chr6:132311198-132314135 (-) // 92.1 // q23.2	connective tissue growth factor	CTGF	209101_at	0.2383	0.2334	0.1929	0.3046	0.3254	0.3636	0.0865	0.3599	0.34	0.3468	0.3264	0.35	0.2878	0.0349	0.0284	0.1773	0.249762	0.1859	0.2583	0.3468	0.3198	0.3208	0.3223	0.1765	0.0158	0.1901	0.0577	0.0518	0.0606
chr7:90731730-90734259 (+) // 97.63 // q21.13	frizzled homolog 1 (Drosophila)	FZD1	204452_s_at	0.2629	0.2362	0.1942	0.3333	0.273	0.308	0.0576	0.2902	0.3173	0.3077	0.3459	0.3003	0.2614	0.1127	0.13	0.2542	0.249056	0.1904	0.2249	0.2604	0.2514	0.2551	0.2584	0.2614	0.0561	0.3184	0.0297	0.0326	-0.0003
chr3:73108241-73108890 (+) // 100.0 // p13	Transcribed locus	---	235733_at	0.2675	0.2764	0.2089	0.2814	0.2086	0.277	0.0758	0.3521	0.3463	0.3706	0.3315	0.3677	0.2895	0.04	0.0354	0.2543	0.248938	0.1191	0.1866	0.2771	0.2497	0.2503	0.2505	0.2152	0.0345	0.2159	0.056	0.0517	0.0722
chr2:217248219-217249383 (-) // 95.27 // q35	insulin-like growth factor binding protein 5	IGFBP5	1555997_s_at	0.3038	0.3408	0.2497	0.3402	0.2424	0.2417	0.125	0.2982	0.3403	0.3006	0.3287	0.2974	0.209	0.0595	0.0505	0.2486	0.248525	0.2279	0.3217	0.4177	0.4052	0.4074	0.4088	0.2966	0.0877	0.3162	-0.0206	-0.0187	-0.0138
chr10:104562424-104566009 (+) // 98.43 // q24.32	chromosome 10 open reading frame 26	C10orf26	202808_at	0.2946	0.3114	0.211	0.337	0.2624	0.1824	-0.0157	0.3206	0.4177	0.3726	0.3767	0.3781	0.193	0.0545	0.0159	0.2554	0.247975	0.3185	0.3667	0.4636	0.3388	0.3423	0.3427	0.3905	0.5376	0.4433	-0.0057	-0.0089	-0.0001
chr2:183407530-183439729 (-) // 99.59 // q32.1	frizzled-related protein	FRZB	203698_s_at	0.2669	0.2377	0.3185	0.351	0.328	0.2046	0.0551	0.3021	0.271	0.3121	0.2909	0.2915	0.2008	0.1041	0.1362	0.2936	0.247756	0.163	0.2713	0.378	0.374	0.3733	0.3733	0.2841	0.0795	0.2613	-0.0218	-0.0228	-0.024
chr4:121832517-121833227 (-) // 90.85 // q27	Transcribed locus	---	235764_at	0.2797	0.2638	0.2554	0.3051	0.3164	0.2307	0.0179	0.3007	0.3051	0.3367	0.3554	0.313	0.2282	0.09	0.0698	0.2932	0.247569	0.1964	0.2764	0.3619	0.3168	0.3174	0.3188	0.3097	0.0923	0.2991	-0.0744	-0.0711	-0.0798
chr17:39990450-39992371 (+) // 87.99 // q21.31	frizzled homolog 2 (Drosophila)	FZD2	210220_at	0.3624	0.3426	0.1784	0.2788	0.2836	0.4483	0.1836	0.258	0.2444	0.2646	0.2653	0.2593	0.2215	0.0185	0.0114	0.3374	0.247381	0.1016	0.1299	0.1926	0.1379	0.1378	0.1398	0.2202	0.0363	0.2145	-0.0577	-0.0532	-0.0584
chr6:84291148-84292142 (+) // 92.81 // q14.2	protease, serine, 35	PRSS35	235874_at	0.3255	0.2819	0.2494	0.328	0.3396	0.1947	0.0504	0.295	0.2994	0.3177	0.311	0.3051	0.2604	0.0869	0.0822	0.2266	0.247112	0.1948	0.2604	0.3333	0.2875	0.2838	0.2884	0.3214	0.1063	0.3054	-0.0424	-0.0413	-0.0451
chr15:69407587-69409480 (+) // 71.22 // q23	CDNA: FLJ21346 fis, clone COL02705	---	234222_at	0.286	0.2426	0.271	0.3318	0.2762	0.1776	0.0376	0.3587	0.3084	0.3364	0.2724	0.3336	0.2931	0.0882	0.11	0.2193	0.246431	0.1977	0.2418	0.3431	0.2267	0.2267	0.228	0.358	0.1024	0.3248	0.1596	0.159	0.182
chr16:71473571-71475885 (-) // 96.1 // q22.3	MRNA; cDNA DKFZp547C126 (from clone DKFZp547C126)	---	215828_at	0.3213	0.2919	0.227	0.3341	0.2428	0.1351	-0.0565	0.3685	0.3558	0.385	0.3059	0.4004	0.213	0.1014	0.068	0.2488	0.246406	0.416	0.3569	0.41	0.2366	0.2398	0.2416	0.3059	0.093	0.2948	0.0848	0.0861	0.1263
chr1:62046732-62401762 (+) // 95.79 // p31.3	InaD-like (Drosophila)	INADL	223681_s_at	0.2708	0.2713	0.2362	0.3147	0.2511	0.1584	-0.0457	0.264	0.3174	0.3183	0.3213	0.3088	0.1949	0.3134	0.233	0.2082	0.246006	0.2039	0.2499	0.3526	0.2949	0.2953	0.295	0.235	0.0596	0.2226	0.1844	0.1715	0.2211
chr10:78313879-78540102 (-) // 99.68 // q22.3	potassium large conductance calcium-activated channel, subfamily M, alpha member 1	KCNMA1	214921_at	0.3175	0.2924	0.1438	0.3329	0.2868	0.1963	0.0578	0.2913	0.4107	0.344	0.4121	0.3542	0.2679	0.0586	0.0522	0.1161	0.245913	0.4615	0.383	0.3373	0.2646	0.2739	0.2746	0.2871	0.0783	0.3495	-0.0593	-0.0287	-0.0753
chr12:63961703-63966775 (+) // 75.65 // q14.3	Transcribed locus	---	1566482_at	0.241	0.2561	0.1821	0.2338	0.1725	0.1558	-0.0357	0.4875	0.405	0.4359	0.3535	0.4402	0.2794	-0.0146	0.0056	0.3243	0.24515	0.1768	0.2066	0.3077	0.161	0.1645	0.1651	0.2348	0.0383	0.2236	-0.0467	-0.0421	-0.0346
chr4:122171837-122173722 (-) // 96.67 // q27	MRNA; cDNA DKFZp564G112 (from clone DKFZp564G112)	---	215059_at	0.3428	0.2996	0.2573	0.3031	0.2958	0.2168	0.0674	0.2687	0.3071	0.3111	0.2692	0.2983	0.2204	0.1273	0.126	0.2055	0.244775	0.2204	0.2918	0.3396	0.3141	0.3176	0.3202	0.2655	0.0831	0.2305	0.0905	0.0945	0.1
chr8:118875909-118876369 (-) // 95.63 // q24.11	exostoses (multiple) 1	EXT1	230183_at	0.2416	0.2667	0.1681	0.3081	0.2348	0.3331	0.1428	0.3064	0.3136	0.3429	0.2938	0.3451	0.203	0.135	0.0962	0.1843	0.244719	0.2258	0.2885	0.3718	0.2787	0.2751	0.2771	0.1848	0.0497	0.1724	-0.0286	-0.0289	-0.0054
chr16:63535164-63535601 (-) // 10.29 // q21	cadherin 11, type 2, OB-cadherin (osteoblast)	CDH11	239286_at	0.2307	0.2389	0.174	0.2937	0.2005	0.3579	0.0867	0.3714	0.3823	0.3866	0.342	0.3958	0.2543	0.0194	-0.0044	0.1815	0.244456	0.162	0.1911	0.2979	0.217	0.2177	0.2195	0.2082	0.0402	0.2211	0.0208	0.0221	0.039
chr6:1672167-1674105 (-) // 90.95 // p25.3	CDNA: FLJ21283 fis, clone COL01910	---	234217_at	0.2395	0.1923	0.2232	0.3472	0.2551	0.1358	0.0624	0.2991	0.3225	0.319	0.2634	0.3395	0.2205	0.2552	0.2555	0.1738	0.244	0.2862	0.3004	0.3038	0.1971	0.1909	0.1928	0.3481	0.0945	0.3106	0.0751	0.0758	0.1059
chr5:79720515-79722695 (-) // 88.86 // q14.1 /// chr6:2608869-2611197 (-) // 98.08 // p25.2	myosin light chain kinase family, member 4	MYLK4	1556136_at	0.3791	0.426	0.2399	0.3427	0.2688	0.1705	0.0483	0.2666	0.3065	0.292	0.276	0.2989	0.2239	0.0785	0.0885	0.1957	0.243869	0.3767	0.4407	0.448	0.4299	0.4233	0.4258	0.3074	0.1973	0.2927	-0.0171	-0.0058	-0.0097
chrX:13497661-13561614 (+) // 99.25 // p22.2	EGF-like-domain, multiple 6	EGFL6	219454_at	0.3672	0.4261	0.2673	0.302	0.277	0.1461	-0.0323	0.2828	0.3019	0.3027	0.2714	0.2823	0.2015	0.0425	0.0491	0.4138	0.243838	0.2679	0.383	0.5061	0.443	0.4446	0.4422	0.2692	0.0693	0.2543	-0.0204	-0.0249	-0.0209
chr3:100998994-101000750 (+) // 87.89 // q12.1	MRNA full length insert cDNA clone EUROIMAGE 1913076	---	226237_at	0.2712	0.2826	0.1888	0.2859	0.2914	0.3667	0.1226	0.3169	0.3142	0.3395	0.29	0.3397	0.2239	0.0354	0.0089	0.2085	0.242888	0.2091	0.296	0.3663	0.3384	0.3348	0.3356	0.1982	0.0382	0.2047	0.0506	0.0486	0.0721
chr17:43480744-43493840 (+) // 96.91 // q21.32	nuclear factor (erythroid-derived 2)-like 1	NFE2L1	200759_x_at	0.3478	0.4289	0.1857	0.2757	0.2483	0.1955	0.0254	0.3232	0.3179	0.3133	0.2916	0.3093	0.1799	0.0771	0.0626	0.3033	0.242844	0.1928	0.2177	0.3611	0.2279	0.2325	0.2338	0.2332	0.0926	0.2601	-0.0311	-0.0289	-0.0325
chr4:104168538-104168879 (-) // 90.4 // q24	Transcribed locus	---	237648_x_at	0.3208	0.2651	0.2426	0.2787	0.3612	0.2357	0.106	0.2664	0.2393	0.2766	0.3019	0.2512	0.2717	0.1019	0.1234	0.2258	0.241769	0.1378	0.2601	0.3077	0.3066	0.3113	0.3083	0.538	0.2304	0.6129	-0.0364	-0.0332	-0.0369
chr3:120413592-120431783 (-) // 97.04 // q13.32	UDP-Gal:betaGlcNAc beta 1,4- galactosyltransferase, polypeptide 4	B4GALT4	210540_s_at	0.2682	0.2626	0.2055	0.3049	0.2112	0.3083	0.0736	0.1868	0.2225	0.2243	0.2715	0.2098	0.1567	0.4336	0.375	0.147	0.241344	0.1731	0.2417	0.2695	0.2598	0.2597	0.2643	0.2481	0.1413	0.2837	0.1344	0.1158	0.103
chr3:106568811-106778436 (+) // 98.45 // q13.11	activated leukocyte cell adhesion molecule	ALCAM	201951_at	0.3175	0.3052	0.2097	0.3193	0.2622	0.3421	0.113	0.2403	0.2598	0.2541	0.2741	0.2499	0.206	0.1724	0.1859	0.1456	0.241069	0.2041	0.2752	0.3148	0.2697	0.2695	0.2732	0.2648	0.0701	0.2634	0.1943	0.18	0.1662
chr12:64144357-64146954 (+) // 86.97 // q14.3	methionine sulfoxide reductase B3	MSRB3	225782_at	0.2886	0.384	0.1615	0.207	0.1784	0.2265	0.0216	0.3977	0.3661	0.3746	0.318	0.3703	0.2121	-0.0144	-0.0311	0.3947	0.240975	0.1135	0.1561	0.3106	0.1729	0.1753	0.1766	0.1394	0.0115	0.1491	-0.0652	-0.0612	-0.0512
chr9:36026915-36114448 (+) // 97.8 // p13.3	reversion-inducing-cysteine-rich protein with kazal motifs	RECK	205407_at	0.2577	0.291	0.2059	0.2652	0.253	0.3867	0.0848	0.3044	0.3089	0.3316	0.3327	0.3105	0.1904	-0.0001	-0.0092	0.3409	0.2409	0.1239	0.1915	0.3738	0.262	0.2613	0.2638	0.2482	0.1058	0.2503	-0.0792	-0.08	-0.0789
chr1:25816545-25983525 (+) // 94.3 // p36.11	mannosidase, alpha, class 1C, member 1	MAN1C1	218918_at	0.2779	0.2476	0.2506	0.3195	0.293	0.1798	-0.0516	0.3293	0.3555	0.3547	0.3525	0.347	0.2247	0.0345	0.0528	0.2843	0.240756	0.3053	0.393	0.4375	0.3885	0.3927	0.393	0.3659	0.1211	0.3342	-0.0398	-0.0399	-0.0602
chr20:29656830-29657582 (+) // 95.09 // q11.21	inhibitor of DNA binding 1, dominant negative helix-loop-helix protein	ID1	208937_s_at	0.27	0.257	0.2099	0.289	0.2683	0.274	0.0623	0.2	0.1875	0.2031	0.2171	0.1876	0.1693	0.4202	0.3989	0.2333	0.240469	0.1377	0.193	0.2475	0.2274	0.2294	0.2322	0.2179	0.0269	0.2377	0.0961	0.0829	0.0718
chr7:150699906-150702630 (-) // 93.02 // q36.1	Negative regulator of ubiquitin-like proteins 1	NUB1	1559732_at	0.2569	0.2185	0.3709	0.302	0.4012	0.2172	0.0466	0.2881	0.237	0.2465	0.2349	0.2309	0.2997	0.092	0.1528	0.2515	0.240419	0.1206	0.2081	0.2744	0.2354	0.2391	0.2407	0.4321	0.1626	0.3907	-0.0258	-0.0239	-0.0238
chr12:45038530-45052821 (-) // 99.38 // q13.11	solute carrier family 38, member 2	SLC38A2	220924_s_at	0.2326	0.2313	0.1859	0.3147	0.2814	0.3719	0.141	0.2684	0.2764	0.2798	0.3014	0.2733	0.2222	0.1607	0.1337	0.1678	0.240156	0.1542	0.2341	0.3134	0.2802	0.2804	0.2859	0.2189	0.0707	0.257	-0.0491	-0.0432	-0.0711
chr13:100504129-100512477 (-) // 98.43 // q33.1	sodium leak channel, non-selective	NALCN	228608_at	0.2615	0.2246	0.2701	0.3648	0.317	0.2518	-0.012	0.2809	0.3135	0.3066	0.3323	0.3048	0.2205	0.0648	0.0574	0.2817	0.240019	0.22	0.2746	0.3728	0.2689	0.2701	0.2726	0.3967	0.106	0.3805	-0.0847	-0.0799	-0.0921
chr2:141458354-141460034 (-) // 88.38 // q22.1	CDNA: FLJ21495 fis, clone COL05614	---	234184_at	0.3057	0.2509	0.1794	0.3359	0.2294	0.1913	0.0018	0.3125	0.3319	0.3386	0.3461	0.3506	0.2743	0.0868	0.0809	0.2194	0.239719	0.2826	0.2903	0.3432	0.2259	0.2273	0.2306	0.4209	0.1323	0.3944	-0.0002	0.0116	-0.005
chr7:18501893-19002923 (+) // 96.51 // p21.1	histone deacetylase 9	HDAC9	1552760_at	0.3764	0.3435	0.4496	0.3241	0.3421	0.178	0.0653	0.2617	0.209	0.2445	0.2159	0.1998	0.2535	0.0439	0.0845	0.2406	0.239525	0.1566	0.4511	0.4335	0.6656	0.6639	0.6555	0.2697	0.0983	0.2246	-0.043	-0.0432	-0.0415
chr13:36320780-36351881 (-) // 100.0 // q13.3	SMAD family member 9	SMAD9	206320_s_at	0.35	0.2891	0.3465	0.3428	0.3964	0.2123	0.1252	0.2812	0.2347	0.2323	0.2393	0.2122	0.3071	0.0189	0.0755	0.1683	0.239488	0.1981	0.3884	0.3546	0.4764	0.4852	0.483	0.3407	0.0863	0.3208	-0.0654	-0.053	-0.0769
chr1:19854090-19857532 (+) // 90.97 // p36.13	neuroblastoma, suppression of tumorigenicity 1	NBL1	37005_at	0.1504	0.153	0.14	0.2216	0.1576	0.1791	-0.0729	0.395	0.3748	0.3609	0.3263	0.3823	0.2406	0.3377	0.3271	0.1544	0.239244	0.1871	0.1617	0.2643	0.1273	0.1357	0.1374	0.1513	-0.0193	0.156	0.2069	0.1913	0.205
chr2:3720187-3728133 (+) // 71.56 // p25.3	allantoicase	ALLC	220365_at	0.2307	0.1941	0.2112	0.2931	0.2615	0.2607	0.0626	0.2973	0.326	0.3255	0.3562	0.3144	0.2496	0.1035	0.142	0.1964	0.23905	0.2198	0.2721	0.2916	0.2284	0.2292	0.2403	0.4439	0.126	0.4563	-0.0227	-0.0157	-0.0237
chr1:842107-846248 (-) // 96.48 // p36.33	similar to hCG1995469	LOC100130417	1555980_a_at	0.2623	0.27	0.194	0.3382	0.2765	0.2231	0.0532	0.3145	0.3523	0.3077	0.2957	0.3302	0.2615	0.0774	0.0644	0.1891	0.238131	0.3855	0.3351	0.362	0.2159	0.2268	0.2256	0.2584	0.0151	0.2448	0.0331	0.0512	0.0282
chr4:120435652-120436120 (+) // 93.79 // q26	ubiquitin specific peptidase 53	USP53	230083_at	0.2513	0.2902	0.197	0.2818	0.1777	0.2043	0.0025	0.2853	0.3239	0.3125	0.3158	0.3093	0.1663	0.2397	0.1775	0.2748	0.238119	0.2444	0.2967	0.3998	0.2959	0.2964	0.2973	0.3168	0.2033	0.3293	0.055	0.047	0.079
chr19:51493528-51538529 (+) // 99.69 // q13.32	hypoxia inducible factor 3, alpha subunit	HIF3A	219319_at	0.2498	0.2363	0.2004	0.3085	0.3184	0.1765	0.1233	0.3189	0.3339	0.2987	0.3135	0.3141	0.2543	0.0385	0.0446	0.2759	0.23785	0.2804	0.256	0.3063	0.1523	0.1613	0.1625	0.2988	0.0538	0.305	-0.0865	-0.0649	-0.0928
chr7:150709142-150709438 (-) // 96.42 // q36.1	WD repeat domain 86	WDR86	243526_at	0.2514	0.2336	0.2157	0.3406	0.2776	0.1864	0.0074	0.3227	0.3412	0.3317	0.3263	0.3357	0.209	0.0863	0.0549	0.2831	0.237725	0.2433	0.2373	0.3672	0.2032	0.2102	0.2115	0.367	0.1311	0.3611	-0.0142	-0.0035	0.0093
chr17:15788955-15819783 (+) // 100.0 // p12	adenosine A2b receptor	ADORA2B	205891_at	0.2426	0.2362	0.1829	0.2857	0.2522	0.3629	0.1814	0.1932	0.2035	0.2088	0.2428	0.1947	0.2382	0.3207	0.3014	0.1542	0.237588	0.1403	0.1767	0.2039	0.1965	0.1967	0.1992	0.2631	0.0678	0.2928	-0.0192	-0.0173	-0.0456
chr6:57161542-57195035 (-) // 96.45 // p12.1	RAB23, member RAS oncogene family	RAB23	223463_at	0.1993	0.23	0.1616	0.2257	0.1581	0.3554	0.0404	0.4102	0.3524	0.3771	0.348	0.3807	0.2502	0.075	0.0275	0.2082	0.237487	0.1274	0.1724	0.2574	0.2062	0.2067	0.2088	0.1146	-0.0166	0.1228	-0.0206	-0.0213	-0.011
chr12:25989055-25989514 (-) // 32.39 // p12.1	Homo sapiens, clone IMAGE:3632683, mRNA	---	242358_at	0.3054	0.361	0.2453	0.2996	0.212	0.2498	-0.0223	0.3078	0.3286	0.3423	0.3223	0.3304	0.1649	-0.0008	-0.0193	0.3707	0.237356	0.2139	0.262	0.3732	0.218	0.2188	0.2203	0.2677	0.0412	0.2674	-0.0847	-0.0848	-0.0639
chr12:45038400-45040667 (-) // 97.75 // q13.11	solute carrier family 38, member 2	SLC38A2	218041_x_at	0.2307	0.2271	0.186	0.3096	0.2794	0.3718	0.1486	0.2657	0.2701	0.2748	0.2898	0.2676	0.2213	0.1557	0.1315	0.1645	0.237137	0.1463	0.227	0.306	0.2783	0.2783	0.2838	0.2152	0.0646	0.2503	-0.05	-0.0435	-0.071
chr2:182720003-182759053 (-) // 81.75 // q32.1	phosphodiesterase 1A, calmodulin-dependent	PDE1A	233547_x_at	0.2944	0.2641	0.3262	0.3666	0.3191	0.2208	0.0562	0.2764	0.2404	0.2938	0.2799	0.2641	0.2236	0.0514	0.0707	0.2463	0.237125	0.137	0.2855	0.3459	0.4218	0.4162	0.4164	0.3245	0.0964	0.3186	-0.0561	-0.0529	-0.06
chr11:62210453-62213947 (-) // 64.73 // q12.3	similar to hypothetical protein	LOC221091	1556427_s_at	0.2421	0.3038	0.1702	0.2153	0.176	0.1744	-0.0187	0.3633	0.3943	0.373	0.3641	0.3682	0.2082	0.0396	0.0388	0.3811	0.237106	0.2005	0.227	0.3601	0.187	0.1947	0.1961	0.2316	0.0442	0.2271	-0.068	-0.0656	-0.0659
chr3:71099480-71100242 (-) // 92.29 // p14.1	forkhead box P1	FOXP1	235444_at	0.2756	0.2449	0.2397	0.3072	0.3007	0.1276	-0.1097	0.3495	0.3774	0.3755	0.3397	0.3787	0.21	0.0659	0.0698	0.2412	0.237106	0.3456	0.3426	0.4052	0.2624	0.2642	0.2641	0.4196	0.2184	0.3876	0.045	0.0394	0.0649
chr12:27679176-27692336 (+) // 99.68 // p11.23 /// chr12:27167442-27179560 (+) // 91.8 // p11.23	PTPRF interacting protein, binding protein 1 (liprin beta 1) /// similar to mKIAA1230 protein	LOC729222 /// PPFIBP1	214375_at	0.1925	0.1735	0.2645	0.3147	0.232	0.1522	-0.0433	0.393	0.338	0.3509	0.2654	0.3811	0.265	0.1354	0.1384	0.2345	0.236738	0.1589	0.1701	0.2939	0.13	0.1329	0.1354	0.2944	0.0465	0.2432	0.0713	0.0765	0.1382
chr5:16526165-16528344 (-) // 97.14 // p15.1	family with sequence similarity 134, member B	FAM134B	218532_s_at	0.2888	0.2919	0.2219	0.3238	0.3023	0.171	-0.0223	0.2683	0.2926	0.3006	0.3042	0.2898	0.1745	0.1428	0.1179	0.3169	0.236563	0.198	0.2459	0.3635	0.2391	0.24	0.2415	0.391	0.2078	0.4062	-0.0268	-0.025	-0.0116
chr2:100990126-101042435 (-) // 89.74 // q11.2	TBC1 domain family, member 8 (with GRAM domain)	TBC1D8	204526_s_at	0.3806	0.3467	0.2298	0.3228	0.2757	0.1543	-0.0248	0.2479	0.2342	0.286	0.2643	0.2693	0.165	0.2128	0.2098	0.2023	0.236044	0.2229	0.2669	0.3145	0.2352	0.2381	0.2416	0.321	0.0834	0.3478	0.1513	0.1431	0.1772
chr6:131237103-131237595 (-) // 95.66 // q23.1	Transcribed locus	---	242652_at	0.2121	0.1938	0.181	0.297	0.1848	0.1239	-0.0857	0.4365	0.3786	0.4046	0.3044	0.4357	0.2725	0.0813	0.0781	0.2742	0.2358	0.2854	0.2941	0.3884	0.2252	0.2284	0.2303	0.3098	0.0467	0.2543	0.0071	0.012	0.0376
chr13:72530930-72549676 (+) // 96.24 // q22.1	Kruppel-like factor 5 (intestinal)	KLF5	209211_at	0.1614	0.1485	0.1553	0.241	0.1355	0.1398	-0.0078	0.126	0.1623	0.1634	0.1763	0.1615	0.096	1	0.8057	0.0967	0.2351	0.1252	0.1458	0.1801	0.1214	0.1238	0.1244	0.2146	0.0411	0.2179	0.2313	0.2112	0.24
chr12:6457073-6461507 (+) // 90.21 // p13.31 /// chr12:32835054-32940957 (-) // 96.93 // p11.21	plakophilin 2	PKP2	207717_s_at	0.2097	0.1886	0.2254	0.2768	0.2245	0.1976	-0.0054	0.1977	0.2389	0.2343	0.2669	0.2282	0.1542	0.5421	0.4233	0.1465	0.234331	0.1953	0.2562	0.2645	0.2323	0.2348	0.2384	0.2744	0.0577	0.2755	0.1128	0.0953	0.1191
chr2:183406251-183406722 (-) // 62.79 // q32.1	Frizzled-related protein	FRZB	244419_at	0.2413	0.235	0.2965	0.3443	0.2955	0.2099	0.0437	0.2725	0.2715	0.2931	0.2768	0.2863	0.1898	0.0966	0.1052	0.2912	0.234325	0.1975	0.2526	0.3814	0.3095	0.3083	0.3104	0.2814	0.0763	0.2547	-0.0406	-0.0345	-0.038
chr17:50697398-50757424 (+) // 96.63 // q22	hepatic leukemia factor	HLF	204754_at	0.2915	0.2639	0.2734	0.3318	0.2676	0.1809	-0.056	0.3054	0.323	0.3463	0.3501	0.3245	0.1911	0.0355	0.0389	0.2763	0.234012	0.2666	0.3868	0.4457	0.368	0.368	0.3703	0.3645	0.085	0.375	-0.0933	-0.0917	-0.0996
chr7:44586592-44588341 (-) // 39.51 // p13	transmembrane emp24 protein transport domain containing 4	TMED4	1558487_a_at	0.2698	0.3129	0.2963	0.3188	0.2476	0.2692	-0.0061	0.3294	0.3117	0.3119	0.3074	0.3109	0.2374	-0.0303	-0.0355	0.2904	0.233863	0.1711	0.22	0.3247	0.2487	0.2514	0.2514	0.2651	0.1171	0.2402	-0.1373	-0.1312	-0.1293
chr13:93338151-93339269 (+) // 98.33 // q31.3	Clone IMAGE:208561, mRNA sequence	---	233667_at	0.3152	0.2363	0.247	0.3129	0.3094	0.162	0.1762	0.3066	0.2507	0.3207	0.2354	0.312	0.245	0.0501	0.0744	0.1856	0.233719	0.1914	0.3236	0.3234	0.308	0.2954	0.2975	0.2925	0.0828	0.246	-0.0165	-0.0134	0.0071
chr17:39992981-39993452 (+) // 99.58 // q21.31	---	---	238129_s_at	0.2869	0.291	0.1573	0.2515	0.3352	0.3574	0.2481	0.2751	0.2842	0.2641	0.2684	0.2663	0.1921	0.0018	0.0155	0.231	0.232869	0.1211	0.1401	0.1949	0.1427	0.1461	0.1471	0.2117	0.0567	0.2268	-0.0357	-0.0205	-0.0291
chr12:51727066-51744423 (+) // 99.03 // q13.13	tensin like C1 domain containing phosphatase (tensin 2)	TENC1	212494_at	0.2488	0.2759	0.1928	0.2559	0.2017	0.1261	-0.0553	0.4162	0.3779	0.3859	0.3276	0.3888	0.2169	-0.0154	0.0109	0.3704	0.232819	0.2367	0.2254	0.3801	0.1536	0.1631	0.1639	0.2007	0.0018	0.2168	0.0463	0.0542	0.0564
chr11:837199-856645 (+) // 99.76 // p15.5	tetraspanin 4	TSPAN4	209264_s_at	0.2332	0.2687	0.177	0.2553	0.3145	0.3643	0.1438	0.2891	0.2808	0.2647	0.3044	0.2586	0.2831	0.002	-0.0007	0.2833	0.232631	0.1176	0.1675	0.2824	0.2282	0.2275	0.2305	0.1479	0.0028	0.1621	-0.0772	-0.071	-0.1059
chr2:217249586-217268493 (-) // 96.11 // q35	insulin-like growth factor binding protein 5	IGFBP5	203425_s_at	0.289	0.2868	0.2164	0.3019	0.2601	0.2298	0.1213	0.3016	0.3157	0.2873	0.3237	0.2857	0.2208	0.0407	0.0535	0.1846	0.232431	0.1976	0.2897	0.3417	0.3761	0.3772	0.3769	0.2563	0.0608	0.2953	-0.0083	-0.0095	-0.0125
chr8:42671718-42711008 (+) // 99.94 // p11.21	cholinergic receptor, nicotinic, beta 3	CHRNB3	207859_s_at	0.2871	0.2319	0.2668	0.3316	0.2884	0.2114	0.0469	0.2836	0.2693	0.2979	0.2844	0.2699	0.2735	0.0575	0.0779	0.2399	0.232375	0.24	0.416	0.4195	0.489	0.4853	0.484	0.2801	0.0787	0.2466	-0.0328	-0.0243	-0.0387
chr16:63578866-63579409 (-) // 81.03 // q21	Cadherin 11, type 2, OB-cadherin (osteoblast)	CDH11	239769_at	0.2152	0.1776	0.1774	0.2711	0.229	0.2118	0.0428	0.4133	0.3441	0.3687	0.3381	0.3789	0.3613	0.0126	0.031	0.1448	0.232356	0.1685	0.2207	0.2494	0.2297	0.2333	0.2346	0.2187	0.0401	0.2334	-0.0101	0.002	-0.0098
chr3:71329725-71715780 (-) // 94.7 // p14.1	forkhead box P1	FOXP1	223936_s_at	0.2758	0.2146	0.3041	0.2982	0.426	0.2511	0.1641	0.244	0.2253	0.237	0.2696	0.2067	0.2758	0.0438	0.1146	0.1667	0.232338	0.1457	0.3318	0.3021	0.4557	0.4516	0.451	0.3681	0.2383	0.3597	-0.0655	-0.0647	-0.094
chr1:61980736-62353189 (+) // 93.39 // p31.3	InaD-like (Drosophila)	INADL	214705_at	0.2775	0.2489	0.3057	0.3051	0.268	0.1549	-0.0675	0.2669	0.2876	0.3233	0.2878	0.2992	0.1927	0.1931	0.1549	0.2188	0.232306	0.1995	0.2748	0.3623	0.3345	0.3309	0.3309	0.2641	0.0795	0.2405	0.1437	0.13	0.1862
chr3:71400953-71402831 (-) // 96.94 // p14.1	Transcribed locus	---	244845_at	0.2683	0.2419	0.2928	0.3294	0.3132	0.1716	-0.0312	0.2872	0.3172	0.3121	0.3241	0.3128	0.2306	0.0611	0.0516	0.232	0.232169	0.2884	0.3301	0.3783	0.2474	0.2463	0.2456	0.49	0.3659	0.4374	-0.0603	-0.0607	-0.0525
chr12:41138866-41145328 (-) // 99.05 // q12	prickle homolog 1 (Drosophila)	PRICKLE1	226069_at	0.2351	0.2434	0.2083	0.3225	0.305	0.2283	0.0245	0.3131	0.3277	0.3237	0.3322	0.3247	0.2322	0.0382	0.0126	0.2412	0.232044	0.2163	0.2627	0.3648	0.2832	0.2818	0.2834	0.249	0.0666	0.2565	-0.0281	-0.0281	-0.0251
chr19:45863653-45864063 (-) // 48.69 // q13.2	numb homolog (Drosophila)-like	NUMBL	242195_x_at	0.2346	0.2294	0.2278	0.3088	0.1709	0.1263	-0.0793	0.3665	0.3621	0.3946	0.3325	0.3961	0.2111	0.0734	0.049	0.3026	0.23165	0.257	0.268	0.3858	0.2138	0.2193	0.2184	0.3244	0.0735	0.2853	0.0102	0.0192	0.0707
chr19:45811458-45821743 (+) // 99.14 // q13.2	latent transforming growth factor beta binding protein 4	LTBP4	213176_s_at	0.1742	0.1476	0.1679	0.2206	0.2301	0.2002	0.0638	0.3924	0.3344	0.3239	0.3347	0.316	0.2748	0.1312	0.1896	0.2041	0.231594	0.1422	0.1606	0.2132	0.1839	0.1893	0.1925	0.1481	0.006	0.1725	0.0186	0.0214	-0.0311
chr11:103285472-103540021 (-) // 99.86 // q22.3	platelet derived growth factor D	PDGFD	222860_s_at	0.2606	0.2163	0.2164	0.2747	0.33	0.1725	0.0986	0.3159	0.2974	0.3046	0.3136	0.2894	0.2751	0.0539	0.0839	0.2022	0.231569	0.2176	0.3416	0.3503	0.3799	0.3815	0.3845	0.3157	0.0729	0.3225	-0.0305	-0.0259	-0.0322
chr10:18469611-18870045 (+) // 97.25 // p12.33	calcium channel, voltage-dependent, beta 2 subunit	CACNB2	213714_at	0.2559	0.2112	0.2318	0.301	0.3186	0.1854	0.0014	0.3092	0.3237	0.3361	0.3666	0.3244	0.1981	0.0627	0.0675	0.2065	0.231256	0.3125	0.3495	0.3332	0.261	0.264	0.2656	0.3658	0.0925	0.369	-0.0898	-0.0855	-0.0943
chr4:514628-523985 (+) // 82.78 // p16.3	Phosphatidylinositol glycan anchor biosynthesis, class G	PIGG	233654_at	0.2472	0.2355	0.2153	0.2764	0.2552	0.2106	0.1649	0.2831	0.3062	0.3196	0.3395	0.3113	0.2162	0.0617	0.0589	0.1958	0.231088	0.1752	0.2116	0.2729	0.1786	0.175	0.1774	0.3162	0.1206	0.3137	-0.0185	-0.0207	0.0005
chr9:123101945-123134941 (+) // 97.19 // q33.2	gelsolin (amyloidosis, Finnish type)	GSN	200696_s_at	0.2612	0.3318	0.2389	0.2573	0.1904	0.108	-0.1073	0.3363	0.3265	0.3011	0.2821	0.2919	0.1748	0.1167	0.1597	0.4256	0.230937	0.2384	0.2515	0.4147	0.2249	0.2335	0.2334	0.2232	0.0145	0.2297	0.0495	0.043	0.0128
chr5:129549186-129550225 (+) // 91.53 // q23.3	chondroitin sulfate synthase 3	CHSY3	242100_at	0.274	0.2478	0.2117	0.3036	0.3259	0.2577	0.1141	0.2678	0.3104	0.297	0.3049	0.2914	0.239	0.0132	0.0065	0.2294	0.2309	0.191	0.2324	0.3037	0.2597	0.2612	0.2634	0.244	0.0578	0.247	-0.0695	-0.0641	-0.0685
chr8:97866277-98419303 (+) // 98.77 // q22.1	plasma glutamate carboxypeptidase	PGCP	203501_at	0.2594	0.2661	0.2469	0.2825	0.2359	0.1592	-0.0742	0.3726	0.3657	0.3913	0.3536	0.3762	0.2165	-0.0448	-0.0443	0.3294	0.23075	0.2597	0.3295	0.4671	0.3488	0.3541	0.3541	0.328	0.0714	0.3071	-0.0717	-0.0685	-0.0685
chr1:65877324-65879827 (+) // 85.91 // p31.3	CDNA clone IMAGE:4795984	---	1556996_at	0.3284	0.2935	0.2035	0.3201	0.2887	0.1866	0.1567	0.2709	0.3241	0.3038	0.2988	0.2971	0.1883	0.0414	0.0405	0.1475	0.230619	0.6107	0.6099	0.4803	0.5059	0.5088	0.5011	0.2851	0.1546	0.3016	-0.0733	-0.0652	-0.0807
chr3:71360824-71361270 (-) // 98.67 // p14.1	Transcribed locus	---	244535_at	0.2722	0.2228	0.2013	0.3215	0.2603	0.1481	-0.0433	0.3309	0.3445	0.3779	0.3309	0.3843	0.1888	0.07	0.0515	0.2272	0.230556	0.3364	0.3324	0.3854	0.2187	0.2185	0.2193	0.4365	0.428	0.4129	0.0071	0.0082	0.0209
chr4:148632805-148633257 (+) // 80.64 // q31.23	CDNA FLJ41174 fis, clone BRACE2042398	---	244832_at	0.2727	0.258	0.2566	0.3102	0.338	0.2503	0.0378	0.2506	0.2481	0.2574	0.2606	0.2499	0.224	0.1071	0.0905	0.2771	0.230556	0.1397	0.1512	0.2891	0.2112	0.2152	0.2167	0.2573	0.0699	0.2859	0.0153	0.0272	0.0275
chr8:38815958-38816793 (+) // 96.67 // p11.23	transforming, acidic coiled-coil containing protein 1	TACC1	242290_at	0.2464	0.2096	0.1783	0.297	0.2252	0.1135	-0.0473	0.3851	0.3756	0.4046	0.3852	0.398	0.1958	0.0543	0.0317	0.2327	0.230356	0.4744	0.3973	0.4364	0.2843	0.2877	0.291	0.3759	0.2926	0.4273	-0.0725	-0.065	-0.0679
chr13:72531264-72548071 (+) // 95.62 // q22.1	Kruppel-like factor 5 (intestinal)	KLF5	209212_s_at	0.1735	0.1375	0.213	0.2164	0.1741	0.1199	0.0104	0.1358	0.117	0.1305	0.126	0.1219	0.1122	0.8057	1	0.0871	0.230063	0.0948	0.1427	0.1439	0.138	0.1398	0.1405	0.2083	0.0363	0.2045	0.2857	0.2646	0.2332
chr17:68679713-68680653 (+) // 75.8 // q25.1	somatostatin receptor 2	SSTR2	239031_at	0.2796	0.2312	0.3019	0.301	0.4273	0.235	0.053	0.242	0.2176	0.2393	0.2369	0.2272	0.2341	0.0761	0.1213	0.2562	0.229981	0.1556	0.2138	0.2656	0.2268	0.2351	0.2351	0.392	0.107	0.3929	-0.0575	-0.0421	-0.0648
chr6:144192040-144192714 (-) // 93.46 // q24.2	Transcribed locus	---	242277_at	0.2314	0.2282	0.1307	0.323	0.2707	0.2444	0.1054	0.2837	0.2841	0.3119	0.3035	0.3127	0.2268	0.1316	0.0817	0.2018	0.229475	0.1429	0.1969	0.2887	0.2469	0.2459	0.2488	0.233	0.0885	0.2544	-0.0504	-0.0485	-0.0552
chr8:119046566-119048423 (-) // 80.88 // q24.11	CDNA: FLJ21448 fis, clone COL04473	---	1564378_a_at	0.2684	0.2326	0.3258	0.2955	0.2915	0.1651	0.0025	0.3192	0.2514	0.2762	0.2318	0.2639	0.2925	0.0953	0.1565	0.2025	0.229419	0.1823	0.3339	0.3607	0.3801	0.3741	0.373	0.3032	0.1542	0.2707	0.0129	0.0132	0.0432
chr3:133882815-133884353 (-) // 64.84 // q22.1	nephronophthisis 3 (adolescent)	NPHP3	235432_at	0.271	0.2552	0.1922	0.2355	0.1226	0.1934	-0.1381	0.3961	0.3361	0.4328	0.3458	0.4169	0.2026	0.0436	0.0003	0.3532	0.2287	0.1548	0.2053	0.3681	0.2053	0.2053	0.2076	0.2818	0.1083	0.257	0.0364	0.024	0.0861
chr2:85214244-85391015 (+) // 94.96 // p11.2	transcription factor 7-like 1 (T-cell specific, HMG-box)	TCF7L1	221016_s_at	0.2669	0.3213	0.1944	0.2763	0.1848	0.2065	-0.0116	0.3265	0.3124	0.313	0.2917	0.3107	0.1833	0.0445	0.0598	0.3743	0.228425	0.1786	0.1908	0.3203	0.1595	0.1643	0.1657	0.1521	-0.0033	0.1597	0.004	0.0002	-0.0053
chr1:23627642-23635757 (-) // 93.4 // p36.12	development and differentiation enhancing factor-like 1	DDEFL1	219103_at	0.2584	0.299	0.2087	0.2688	0.2055	0.1473	-0.0781	0.3452	0.3384	0.3167	0.299	0.3198	0.2261	0.0927	0.1349	0.2721	0.228406	0.3085	0.2905	0.3608	0.2502	0.2588	0.2578	0.1518	-0.023	0.1448	0.1082	0.1055	0.0739
chr20:36272305-36303676 (-) // 88.49 // q11.23	KIAA1755	KIAA1755	231893_at	0.2595	0.2282	0.265	0.3492	0.3855	0.1688	0.1819	0.2546	0.2781	0.26	0.241	0.2575	0.222	0.0286	0.0565	0.2095	0.227869	0.2491	0.2454	0.3133	0.2387	0.2423	0.2445	0.3004	0.0514	0.2963	-0.1009	-0.0727	-0.1142
chr17:68683216-68684366 (+) // 60.68 // q25.1	CDNA FLJ34007 fis, clone FCBBF1000349	---	233310_at	0.2886	0.2404	0.2422	0.3082	0.4093	0.2407	0.0271	0.2279	0.2456	0.2654	0.2707	0.2557	0.1685	0.0857	0.0839	0.286	0.227869	0.1722	0.1886	0.2859	0.1989	0.2051	0.2046	0.3875	0.1081	0.3898	-0.0572	-0.0525	-0.063
chr4:108062409-108176903 (-) // 98.91 // q25	dickkopf homolog 2 (Xenopus laevis)	DKK2	219908_at	0.2538	0.2463	0.2231	0.2787	0.3639	0.2049	0.0184	0.2515	0.2447	0.2801	0.2423	0.2594	0.2002	0.1087	0.1086	0.358	0.227663	0.1114	0.1565	0.3076	0.2533	0.2517	0.2507	0.1639	0.035	0.1541	-0.0274	-0.0248	-0.0261
chr14:60245998-60246484 (-) // 99.79 // q23.1	SIX homeobox 4	SIX4	229796_at	0.5144	0.5584	0.2197	0.3037	0.1412	0.2616	0.0951	0.1585	0.1823	0.1966	0.1871	0.1863	0.1211	0.1745	0.1383	0.1963	0.227194	0.0963	0.1573	0.1728	0.1623	0.162	0.1623	0.1545	0.0048	0.1556	0.1709	0.1642	0.2088
chr12:52806112-52812891 (+) // 87.08 // q13.13	hypothetical gene supported by BC009385	LOC400043	226582_at	0.3127	0.3354	0.2792	0.3321	0.2062	0.2736	0.0062	0.263	0.2509	0.2663	0.2314	0.2635	0.1884	0.0085	0.0174	0.3959	0.226919	0.1465	0.2079	0.3155	0.2677	0.266	0.2674	0.1646	0.0105	0.148	0.0251	0.025	0.05
chr19:50959841-50960352 (-) // 98.83 // q13.32	SIX homeobox 5	SIX5	229009_at	0.2521	0.2871	0.2109	0.2898	0.1573	0.2569	0.0037	0.3002	0.319	0.2993	0.2823	0.3107	0.1977	0.1082	0.1105	0.2435	0.226825	0.1569	0.1292	0.218	0.0976	0.103	0.1042	0.0914	-0.0651	0.1132	0.2256	0.2126	0.2057
chr7:100037925-100043730 (+) // 97.15 // q22.1	procollagen C-endopeptidase enhancer	PCOLCE	202465_at	0.2747	0.2626	0.1807	0.2148	0.2224	0.3659	0.0754	0.3142	0.281	0.3213	0.2632	0.3116	0.1998	0.0062	0.0127	0.3226	0.226819	0.1239	0.1675	0.271	0.2096	0.2111	0.2132	0.1326	0.0017	0.1231	0.0277	0.0268	0.0373
chr17:55515708-55520610 (-) // 96.79 // q23.1	similar to WDNM1-like protein	LOC645638	229566_at	0.2704	0.2592	0.215	0.3048	0.2889	0.2269	0.1191	0.1881	0.2209	0.2107	0.243	0.2039	0.1857	0.2448	0.267	0.1759	0.226519	0.1449	0.1808	0.2519	0.1972	0.2	0.2009	0.2604	0.0871	0.2763	0.0193	0.0324	0.0097
chr10:35144694-35145356 (+) // 99.4 // p11.21	Transcribed locus	---	230545_at	0.2462	0.2329	0.2342	0.2761	0.2557	0.1865	0.0987	0.2572	0.3029	0.3077	0.3288	0.3025	0.2145	0.112	0.0664	0.2012	0.226469	0.1779	0.2125	0.2686	0.1588	0.1601	0.1606	0.2947	0.0581	0.2727	-0.0242	-0.0153	-0.0097
chr12:52391209-52407481 (-) // 97.44 // q13.13	calcium binding and coiled-coil domain 1	CALCOCO1	209002_s_at	0.2589	0.2807	0.2105	0.2797	0.2364	0.1043	-0.1575	0.386	0.3834	0.3359	0.3335	0.3436	0.2151	0.0456	0.1051	0.2547	0.225994	0.3504	0.3255	0.4004	0.2459	0.2581	0.2566	0.2658	0.069	0.2692	0.0471	0.0542	0.0009
chr5:167111868-167112186 (-) // 50.94 // q34	---	---	241203_at	0.1713	0.1655	0.1348	0.3159	0.1805	0.1675	0.0134	0.2867	0.3975	0.3555	0.4265	0.3619	0.3244	0.082	0.0409	0.1877	0.22575	0.2328	0.2292	0.2854	0.1863	0.1877	0.1932	0.2437	0.0685	0.2737	-0.0347	-0.0219	-0.0298
chr13:40068094-40069344 (-) // 36.6 // q14.11	CDNA FLJ12289 fis, clone MAMMA1001788	---	232882_at	0.2405	0.2045	0.1326	0.2445	0.1696	0.0878	-0.1118	0.4031	0.3963	0.4198	0.3705	0.4233	0.232	0.0942	0.0691	0.2283	0.225269	0.3658	0.3622	0.4041	0.2258	0.2308	0.2322	0.3518	0.1108	0.3427	0.041	0.0465	0.0737
chr19:45796940-45827562 (+) // 95.47 // q13.2	latent transforming growth factor beta binding protein 4	LTBP4	204442_x_at	0.1548	0.1657	0.215	0.2224	0.1575	0.122	-0.0017	0.4249	0.3584	0.3281	0.3054	0.3315	0.2532	0.1399	0.1796	0.2447	0.225088	0.1455	0.133	0.2509	0.1082	0.1147	0.1151	0.1682	0.013	0.1642	-0.0063	0.0004	-0.0094
chr12:44103080-44112397 (+) // 98.15 // q12	transmembrane protein 16F	TMEM16F	224906_at	0.2489	0.327	0.1792	0.2235	0.1646	0.2001	-0.0292	0.3395	0.3462	0.3558	0.3245	0.3414	0.2146	0.0158	-0.0274	0.3758	0.225019	0.1895	0.2508	0.4044	0.2594	0.2622	0.2648	0.2279	0.0247	0.2259	-0.0831	-0.0848	-0.0812
chr5:54496754-54499096 (+) // 74.84 // q11.2	Similar to RIKEN cDNA 2310016C16	LOC493869	228141_at	0.2257	0.2946	0.1489	0.2301	0.1949	0.4037	0.2012	0.29	0.2918	0.3011	0.276	0.2992	0.2193	0.0081	-0.0381	0.2526	0.224944	0.0691	0.1156	0.2295	0.1659	0.1651	0.1669	0.0969	-0.0001	0.088	-0.024	-0.0249	-0.0127
chr3:73669645-73671493 (+) // 60.73 // p13	CDNA FLJ12196 fis, clone MAMMA1000867	---	233286_at	0.2331	0.1939	0.1085	0.2887	0.1471	0.1651	0.0275	0.3728	0.3257	0.4125	0.3546	0.4167	0.2372	0.0777	0.0484	0.189	0.224906	0.2016	0.2242	0.2879	0.1821	0.1818	0.184	0.2403	0.0602	0.2611	0.0136	0.0203	0.0246
chr11:65062851-65081964 (-) // 96.62 // q13.1	latent transforming growth factor beta binding protein 3	LTBP3	219922_s_at	0.2362	0.2283	0.2176	0.3047	0.2029	0.2348	-0.0615	0.3633	0.3485	0.3474	0.3138	0.3484	0.2058	0.0326	0.0361	0.2382	0.224819	0.1986	0.2167	0.324	0.2126	0.2159	0.2169	0.2057	-0.0113	0.1907	0.126	0.1168	0.1176
chr11:111020272-111023496 (+) // 25.48 // q23.1	CDNA: FLJ23261 fis, clone COL05862	---	233648_at	0.284	0.3099	0.2043	0.3026	0.1855	0.1031	-0.0948	0.3329	0.3181	0.3556	0.3066	0.3446	0.1484	0.0522	0.0383	0.3977	0.224312	0.3576	0.3469	0.4886	0.2576	0.2556	0.2597	0.3268	0.1358	0.3386	-0.0244	-0.028	-0.0124
chr7:76660552-76662559 (-) // 98.17 // q11.23	fibrinogen-like 2	FGL2	227265_at	0.2744	0.2383	0.225	0.3223	0.2922	0.1345	-0.0507	0.297	0.3245	0.3396	0.3238	0.3293	0.1952	0.0416	0.0248	0.2685	0.223769	0.3321	0.3801	0.4741	0.3742	0.3791	0.3773	0.4091	0.2138	0.4029	-0.08	-0.0784	-0.0879
chr20:45718498-45799001 (-) // 99.49 // q13.12	sulfatase 2	SULF2	224724_at	0.2117	0.1764	0.1997	0.2849	0.2409	0.1609	-0.0263	0.3394	0.3393	0.3457	0.3057	0.3453	0.2048	0.1453	0.1025	0.2039	0.223756	0.2388	0.2797	0.3491	0.2959	0.2995	0.3001	0.2808	0.0642	0.284	0.064	0.0585	0.0774
chr22:23796179-23923407 (+) // 88.74 // q11.23	KIAA1671 protein /// hypothetical protein LOC100131004	CTA-221G9.4 /// LOC100131004	225525_at	0.26	0.251	0.237	0.305	0.178	0.1021	-0.0641	0.1962	0.2284	0.2367	0.2188	0.2377	0.1448	0.4645	0.4186	0.1626	0.223581	0.1412	0.1838	0.2556	0.1706	0.1702	0.1736	0.2144	0.0731	0.2155	0.2631	0.2426	0.2952
chr15:27780800-27788268 (-) // 99.58 // q13.1	tight junction protein 1 (zona occludens 1)	TJP1	214168_s_at	0.1972	0.1803	0.2051	0.271	0.236	0.2989	0.1369	0.2416	0.2106	0.2164	0.2342	0.2005	0.2201	0.2558	0.2689	0.2011	0.223412	0.0834	0.1747	0.2182	0.2407	0.2397	0.2462	0.1757	0.0069	0.1873	-0.0098	-0.0092	-0.0283
chr8:92039348-92040812 (-) // 92.41 // q21.3	hypothetical protein LOC100127983	LOC100127983	1557961_s_at	0.2294	0.1972	0.199	0.2906	0.2125	0.2207	-0.0167	0.3868	0.3347	0.3893	0.3461	0.3864	0.1992	-0.0304	-0.0075	0.2348	0.223256	0.195	0.2522	0.3513	0.2626	0.2647	0.2641	0.321	0.0705	0.3122	-0.127	-0.1238	-0.1312
chr9:17263728-17493877 (+) // 85.49 // p22.2	centlein, centrosomal protein	CNTLN	220095_at	0.2231	0.2506	0.1379	0.2651	0.2075	0.305	-0.0079	0.324	0.3719	0.3263	0.3591	0.3356	0.2789	-0.0429	-0.0335	0.2697	0.22315	0.2878	0.2704	0.3114	0.217	0.2206	0.2227	0.1944	0.0237	0.2171	-0.1182	-0.1028	-0.142
chr7:18501893-19002923 (+) // 96.51 // p21.1	histone deacetylase 9	HDAC9	1552758_at	0.3551	0.3064	0.3734	0.2959	0.332	0.1699	0.1295	0.2414	0.1915	0.2213	0.2014	0.1763	0.2535	0.039	0.0786	0.2034	0.223037	0.1358	0.4549	0.3874	0.6628	0.6637	0.657	0.2397	0.0762	0.199	-0.0495	-0.0444	-0.0519
chr8:43176010-43177127 (+) // 80.87 // p11.21	heparan-alpha-glucosaminide N-acetyltransferase	HGSNAT	227564_at	0.2602	0.2658	0.185	0.2606	0.2121	0.1591	-0.0094	0.3018	0.3459	0.3459	0.3085	0.3442	0.1486	0.0877	0.0451	0.3001	0.222575	0.2063	0.2227	0.3347	0.1738	0.1746	0.176	0.2418	0.0471	0.24	0.0965	0.089	0.1196
chr2:172087269-172119794 (+) // 95.58 // q31.1	cytochrome b reductase 1	CYBRD1	217889_s_at	0.2571	0.2604	0.2272	0.2635	0.3054	0.2908	0.1051	0.27	0.2566	0.277	0.2838	0.2529	0.2247	-0.0077	0.018	0.2753	0.222506	0.099	0.2239	0.3185	0.3737	0.3733	0.3741	0.2092	0.0433	0.224	0.0298	0.0212	0.0201
chr2:210761010-210798237 (-) // 97.38 // q34	acyl-Coenzyme A dehydrogenase, long chain	ACADL	206069_s_at	0.3083	0.3211	0.2585	0.2948	0.2841	0.1616	-0.0038	0.2606	0.2615	0.2798	0.2694	0.2661	0.1964	0.0325	0.0469	0.3218	0.222475	0.2099	0.2681	0.3685	0.2518	0.2553	0.2572	0.4212	0.1242	0.4414	-0.0446	-0.0451	-0.0387
chr12:94003449-94055526 (-) // 97.17 // q22	FYVE, RhoGEF and PH domain containing 6	FGD6	1555136_at	0.2001	0.177	0.227	0.2927	0.218	0.1953	0.0629	0.2786	0.2587	0.2746	0.2609	0.2676	0.2518	0.202	0.1879	0.2026	0.222356	0.176	0.2013	0.2762	0.1986	0.1957	0.198	0.3185	0.1543	0.3113	0.0047	0.0126	0.0131
chrX:102498078-102500037 (+) // 68.21 // q22.1	WW domain binding protein 5	WBP5	217975_at	0.1557	0.1785	0.1401	0.2421	0.2006	0.3692	0.0851	0.3236	0.2805	0.2982	0.2998	0.2999	0.2601	0.1375	0.101	0.1841	0.22225	0.0818	0.1247	0.2061	0.1569	0.1584	0.1615	0.0859	-0.0604	0.117	-0.0012	-0.0015	-0.0059
chr2:153051929-153055498 (+) // 79.75 // q23.3	MRNA; cDNA DKFZp547N074 (from clone DKFZp547N074)	---	215062_at	0.2341	0.1825	0.2182	0.3221	0.1969	0.1516	-0.0297	0.36	0.3202	0.3654	0.2887	0.377	0.237	0.0636	0.0547	0.2132	0.222219	0.3049	0.2721	0.3366	0.1911	0.1933	0.1952	0.3492	0.0735	0.3272	0.0042	0.011	0.0301
chr19:51535801-51537500 (+) // 58.93 // q13.32	hypoxia inducible factor 3, alpha subunit	HIF3A	1556069_s_at	0.257	0.2093	0.1988	0.2713	0.2556	0.1522	0.0001	0.3408	0.2969	0.3091	0.2761	0.3137	0.2723	0.0511	0.0976	0.2528	0.222169	0.2271	0.2359	0.281	0.1704	0.1772	0.1789	0.3224	0.0781	0.2995	-0.0378	-0.0182	-0.0367
chr7:134270099-134270555 (+) // 55.52 // q33	Caldesmon 1	CALD1	235834_at	0.1658	0.1516	0.1385	0.2377	0.1309	0.155	-0.0187	0.4811	0.3747	0.4369	0.3045	0.4595	0.2614	0.0388	0.0369	0.1934	0.22175	0.1894	0.2155	0.2935	0.1536	0.156	0.1575	0.1833	-0.0036	0.1571	0.045	0.0429	0.0895
chr14:69415895-69568836 (+) // 96.88 // q24.2	SPARC related modular calcium binding 1	SMOC1	222783_s_at	0.2968	0.2715	0.2394	0.3048	0.2395	0.2289	0.0787	0.2473	0.2451	0.2342	0.3139	0.2249	0.2204	0.1351	0.1172	0.1479	0.2216	0.2031	0.3063	0.2979	0.2718	0.2806	0.2794	0.268	0.0754	0.2831	-0.0546	-0.0339	-0.0617
chr1:62392924-62394314 (+) // 78.0 // p31.3	CDNA FLJ30409 fis, clone BRACE2008615	---	1560512_at	0.2734	0.2316	0.2432	0.2846	0.2365	0.1147	-0.0676	0.2804	0.3023	0.336	0.2687	0.3262	0.1846	0.1837	0.1631	0.1841	0.221594	0.231	0.2611	0.3379	0.2642	0.2639	0.2636	0.269	0.0594	0.227	0.2013	0.1899	0.2553
chr21:33939803-33941161 (+) // 68.4 // q22.11	Chromosome 21q22.1 anonymous mRNA sequence	---	215791_at	0.2802	0.2766	0.1473	0.2549	0.1571	0.1409	-0.0466	0.3421	0.2956	0.3917	0.295	0.3673	0.1598	0.0416	0.0251	0.4111	0.221231	0.1981	0.2339	0.4203	0.2331	0.2326	0.2353	0.2977	0.0675	0.2929	-0.0014	-0.0081	0.0186
chr3:58124872-58127587 (+) // 67.26 // p14.3	CDNA clone IMAGE:5272221	---	1562416_at	0.2286	0.1808	0.2017	0.2757	0.2379	0.114	-0.0357	0.3406	0.2816	0.2977	0.2393	0.313	0.2529	0.2162	0.2289	0.1644	0.2211	0.2199	0.2166	0.2843	0.1563	0.1599	0.1605	0.2963	0.0669	0.251	0.0986	0.1063	0.1346
chr4:120354709-120360895 (+) // 55.76 // q26	ubiquitin specific peptidase 53	USP53	237465_at	0.22	0.2344	0.2499	0.2772	0.2214	0.2099	0.0098	0.2766	0.2589	0.2623	0.2649	0.2545	0.2224	0.1639	0.1474	0.2637	0.221075	0.196	0.2751	0.3749	0.3116	0.3126	0.3116	0.3179	0.1002	0.2931	0.0133	0.007	0.0285
chr16:63536631-63537130 (-) // 89.22 // q21	cadherin 11, type 2, OB-cadherin (osteoblast)	CDH11	236179_at	0.195	0.1894	0.1686	0.2535	0.2091	0.3133	0.1214	0.3446	0.3341	0.3499	0.332	0.3479	0.2175	-0.0077	-0.011	0.1795	0.221069	0.1243	0.1903	0.2768	0.2359	0.2338	0.2339	0.2055	0.0408	0.221	-0.0117	-0.0118	0.0012
chr1:19854090-19857522 (+) // 95.7 // p36.13	neuroblastoma, suppression of tumorigenicity 1	NBL1	201621_at	0.1513	0.1443	0.1208	0.193	0.1429	0.1442	-0.0495	0.3637	0.3316	0.3444	0.2906	0.3562	0.2071	0.3326	0.3205	0.1432	0.221056	0.1386	0.1391	0.2398	0.1276	0.1333	0.1353	0.1371	-0.0221	0.1363	0.2255	0.2015	0.2215
chr1:103115602-103346483 (-) // 98.98 // p21.1	collagen, type XI, alpha 1	COL11A1	204320_at	0.2599	0.2453	0.2227	0.2898	0.2241	0.2217	0.0314	0.2999	0.2818	0.3342	0.2413	0.3405	0.1869	0.0743	0.0579	0.2205	0.220763	0.1625	0.1999	0.2787	0.2232	0.2225	0.2235	0.2109	0.0425	0.1869	0.1072	0.1034	0.1407
chr1:87567375-87583673 (+) // 97.08 // p22.3	LIM domain only 4	LMO4	209205_s_at	0.2899	0.2611	0.247	0.3247	0.2808	0.209	0.0266	0.2608	0.2829	0.2597	0.2925	0.2549	0.1953	0.0341	0.073	0.2377	0.220625	0.2653	0.3451	0.335	0.3001	0.3046	0.3037	0.2594	0.0399	0.261	-0.0265	-0.0199	-0.0511
chr19:18406631-18409119 (-) // 98.77 // p13.11	myo-inositol 1-phosphate synthase A1	ISYNA1	222240_s_at	0.2501	0.2182	0.1735	0.3012	0.2093	0.2166	-0.0004	0.2932	0.2992	0.3229	0.3373	0.3187	0.2189	0.0537	0.0663	0.2471	0.220363	0.12	0.1414	0.2285	0.1636	0.164	0.1648	0.2685	0.0425	0.276	0.0512	0.0512	0.0517
chr14:60194980-60195482 (+) // 96.72 // q23.1	Transcribed locus	---	236828_at	0.514	0.5982	0.2489	0.2803	0.1989	0.1118	0.0665	0.1674	0.1984	0.1802	0.1808	0.1701	0.1161	0.0235	0.0401	0.4256	0.22005	0.1627	0.2058	0.2472	0.1775	0.1822	0.1805	0.1734	0.0348	0.1781	0.0066	0.0164	0.0096
chr7:93861808-93898473 (+) // 98.44 // q21.3	collagen, type I, alpha 2	COL1A2	202403_s_at	0.192	0.1976	0.1282	0.18	0.1608	0.2469	-0.0083	0.3895	0.3373	0.3814	0.2771	0.3894	0.2153	0.0958	0.1013	0.2362	0.220031	0.0967	0.1277	0.2401	0.1545	0.1581	0.16	0.0995	-0.0269	0.1029	0.2304	0.2184	0.2733
chr19:2948643-2980175 (-) // 85.38 // p13.3	transducin-like enhancer of split 2 (E(sp1) homolog, Drosophila)	TLE2	40837_at	0.236	0.2723	0.2614	0.2943	0.1701	0.0996	-0.1158	0.3135	0.349	0.3268	0.3147	0.3339	0.1955	0.0983	0.1046	0.2656	0.219988	0.2368	0.219	0.2905	0.1438	0.1495	0.15	0.215	-0.005	0.1941	0.0814	0.0785	0.0724
chr2:54608210-54610493 (+) // 79.71 // p16.2	ribosomal protein L23a pseudogene 13	RPL23AP13	207283_at	0.2397	0.269	0.1727	0.2626	0.1158	0.1384	-0.0685	0.3728	0.3499	0.406	0.3274	0.3982	0.17	0.0035	-0.0387	0.4008	0.219975	0.2569	0.2571	0.4298	0.1991	0.1979	0.1994	0.2666	0.0401	0.248	-0.0853	-0.0824	-0.0679
chr9:123070166-123114591 (+) // 90.1 // q33.2	gelsolin (amyloidosis, Finnish type)	GSN	214040_s_at	0.2732	0.279	0.2619	0.2482	0.3025	0.1713	0.0432	0.2388	0.2172	0.2223	0.2444	0.1967	0.1949	0.1138	0.2072	0.3025	0.219819	0.1309	0.272	0.3359	0.3834	0.3843	0.3859	0.236	0.0543	0.2484	0.0631	0.0503	-0.0209
chr5:167558645-167623739 (+) // 98.28 // q35.1	odz, odd Oz/ten-m homolog 2 (Drosophila)	ODZ2	231867_at	0.2008	0.1857	0.1999	0.2835	0.2217	0.3147	0.1161	0.2406	0.2761	0.2672	0.2874	0.2652	0.194	0.1548	0.1326	0.1759	0.219762	0.2053	0.2802	0.3077	0.2682	0.2711	0.2712	0.2534	0.0584	0.2487	-0.08	-0.0697	-0.0922
chr8:27547495-27572977 (+) // 88.37 // p21.1	scavenger receptor class A, member 3	SCARA3	223842_s_at	0.1854	0.1638	0.1859	0.2487	0.2534	0.2407	0.044	0.357	0.3152	0.3284	0.3163	0.3226	0.2907	0.0377	0.0605	0.1615	0.219488	0.1059	0.1361	0.1726	0.1568	0.1572	0.1588	0.1253	0.0045	0.1301	0.0546	0.0634	0.0471
chr6:116943774-116946402 (+) // 44.76 // q22.1	family with sequence similarity 26, member E	FAM26E	232217_at	0.2137	0.2543	0.2038	0.2753	0.3107	0.2694	0.149	0.28	0.2841	0.2757	0.2495	0.2769	0.2363	-0.0185	-0.0186	0.2701	0.219481	0.1314	0.2245	0.3482	0.3007	0.2996	0.3012	0.1829	0.0464	0.1703	-0.0542	-0.0501	-0.044
chr12:27568457-27737852 (+) // 98.76 // p11.23	PTPRF interacting protein, binding protein 1 (liprin beta 1)	PPFIBP1	203736_s_at	0.198	0.1889	0.2305	0.2755	0.3073	0.345	0.154	0.2203	0.2186	0.2328	0.2556	0.2175	0.2484	0.1108	0.1153	0.1925	0.219437	0.0529	0.1322	0.2038	0.2338	0.229	0.2359	0.1956	0.0391	0.2119	-0.05	-0.0462	-0.0634
---	armadillo repeat containing, X-linked 4	ARMCX4	1552327_at	0.221	0.214	0.2297	0.2439	0.1898	0.167	-0.1492	0.388	0.3629	0.3884	0.3567	0.3865	0.2063	0.0045	0.0092	0.292	0.219419	0.216	0.2293	0.3346	0.2084	0.2096	0.2107	0.3012	0.1083	0.3068	-0.0194	-0.0171	-0.0066
chr12:64144357-64146954 (+) // 86.97 // q14.3	methionine sulfoxide reductase B3	MSRB3	225790_at	0.279	0.322	0.1354	0.1899	0.213	0.2382	0.0591	0.3676	0.3165	0.3206	0.2869	0.3177	0.2309	-0.0537	-0.0349	0.3225	0.219419	0.0967	0.1516	0.2501	0.1933	0.1943	0.1963	0.1236	0.0073	0.1357	-0.0815	-0.0742	-0.0916
chr6:7486868-7531803 (+) // 99.36 // p24.3	desmoplakin	DSP	200606_at	0.208	0.1847	0.2178	0.313	0.1578	0.1717	-0.0353	0.1574	0.1804	0.209	0.1699	0.2071	0.1137	0.6032	0.5425	0.1088	0.219356	0.1725	0.2039	0.2675	0.2021	0.2048	0.207	0.211	0.0141	0.2149	0.2507	0.2433	0.2969
chr7:93888980-93889820 (+) // 98.24 // q21.3	collagen, type I, alpha 2	COL1A2	229218_at	0.1787	0.168	0.1339	0.1779	0.1241	0.1635	-0.0587	0.4519	0.3702	0.4552	0.3008	0.4617	0.2429	0.0443	0.0467	0.2485	0.21935	0.131	0.1591	0.2685	0.158	0.1603	0.1608	0.1292	-0.0072	0.1179	0.171	0.167	0.223
chr1:114323601-114326398 (+) // 98.49 // p13.2	olfactomedin-like 3	OLFML3	218162_at	0.1822	0.1937	0.1421	0.177	0.1579	0.2573	-0.0143	0.425	0.3683	0.3941	0.3395	0.3933	0.2326	-0.004	0.0107	0.2536	0.219313	0.1502	0.1958	0.3322	0.2484	0.2517	0.2527	0.1242	0.0002	0.1195	0.0541	0.0502	0.0614
chr6:26195426-26205035 (+) // 85.63 // p22.1	hemochromatosis	HFE	206087_x_at	0.243	0.2703	0.2007	0.2407	0.1902	0.2577	0.0279	0.2632	0.2482	0.2754	0.2611	0.2601	0.2058	0.1544	0.1386	0.2711	0.219275	0.186	0.2428	0.3477	0.2672	0.2706	0.2746	0.2529	0.0532	0.2573	0.0605	0.0673	0.0597
chr11:101607702-101609359 (+) // 90.8 // q22.2	Yes-associated protein 1, 65kDa	YAP1	224894_at	0.2065	0.2849	0.1308	0.1963	0.0561	0.2584	0.0202	0.2969	0.2842	0.2972	0.2724	0.2891	0.1751	0.2624	0.1793	0.2904	0.218762	0.058	0.1003	0.2239	0.1051	0.107	0.1091	0.0546	-0.0505	0.0739	0.1002	0.0989	0.1206
chr15:82113841-82402533 (+) // 98.69 // q25.2	ADAMTS-like 3	ADAMTSL3	1559748_at	0.2629	0.2276	0.2045	0.3032	0.3556	0.1561	0.2639	0.2548	0.2546	0.2334	0.2587	0.2316	0.2641	0.0453	0.0655	0.1175	0.218706	0.2842	0.3439	0.3261	0.3516	0.3606	0.3596	0.2551	0.0627	0.2681	-0.0043	0.016	-0.0219
chr14:59972427-60021560 (-) // 89.77 // q23.1	chromosome 14 open reading frame 39	C14orf39	1561985_at	0.3365	0.3363	0.2117	0.288	0.1958	0.1914	-0.0113	0.258	0.3079	0.2874	0.3077	0.29	0.1843	0.0502	0.0647	0.2002	0.218675	0.3134	0.3284	0.3566	0.2807	0.2842	0.2819	0.3173	0.0908	0.3176	-0.0456	-0.0397	-0.0429
chr9:132700273-132752881 (+) // 96.12 // q34.12	c-abl oncogene 1, receptor tyrosine kinase	ABL1	202123_s_at	0.1847	0.1958	0.157	0.2417	0.2163	0.3126	-0.0362	0.3572	0.336	0.3046	0.3081	0.3267	0.2515	0.0505	0.0668	0.2247	0.218625	0.1845	0.1494	0.2343	0.1409	0.1489	0.1504	0.1296	-0.0467	0.1351	-0.0172	-0.0216	-0.0478
chr4:122169900-122170354 (-) // 80.95 // q27	Transcribed locus	---	241560_at	0.3168	0.2679	0.2534	0.2826	0.2485	0.1794	0.023	0.2471	0.2793	0.2884	0.2382	0.2754	0.2025	0.101	0.0972	0.195	0.218481	0.1977	0.2716	0.3243	0.2829	0.2868	0.2901	0.263	0.0889	0.2232	0.0463	0.0462	0.0613
chr8:38822573-38824796 (+) // 69.9 // p11.23	Transforming, acidic coiled-coil containing protein 1	TACC1	1557305_at	0.2453	0.181	0.232	0.2854	0.255	0.1143	0.0232	0.3583	0.296	0.3276	0.302	0.3187	0.2621	0.0298	0.0664	0.1984	0.218469	0.3462	0.3603	0.366	0.2801	0.2823	0.2844	0.4437	0.357	0.445	-0.0821	-0.073	-0.0779
chr8:27547495-27572977 (+) // 88.37 // p21.1	scavenger receptor class A, member 3	SCARA3	223843_at	0.2418	0.2343	0.2309	0.2692	0.2078	0.2143	0.0144	0.2959	0.2827	0.3315	0.2914	0.3129	0.2081	0.1006	0.0705	0.1886	0.218431	0.112	0.1744	0.2427	0.2028	0.201	0.2013	0.1853	0.0337	0.1699	0.0845	0.0876	0.1173
chr7:90738122-90738575 (+) // 98.69 // q21.13	Transcribed locus	---	236035_at	0.2594	0.2283	0.1686	0.3092	0.1666	0.2071	0.0052	0.2621	0.3198	0.3358	0.3135	0.3297	0.1859	0.0871	0.0509	0.2655	0.218419	0.1948	0.233	0.2889	0.1934	0.1952	0.1963	0.3051	0.1095	0.3176	0.0072	0.0063	0.0274
chr1:103309638-103311668 (-) // 85.49 // p21.1	CDNA FLJ11973 fis, clone HEMBB1001221	---	232805_at	0.267	0.2354	0.2953	0.3071	0.2557	0.1869	0.0379	0.283	0.2374	0.2908	0.2281	0.271	0.1988	0.0793	0.0911	0.2268	0.218225	0.1733	0.2493	0.2869	0.2864	0.2837	0.2823	0.2491	0.0657	0.2238	-0.0057	-0.0055	0.0002
chr1:181484001-181654360 (-) // 93.11 // q25.3	nicotinamide nucleotide adenylyltransferase 2 /// hypothetical protein LOC100131795	LOC100131795 /// NMNAT2	209755_at	0.2725	0.244	0.2165	0.3257	0.3205	0.1954	0.0085	0.2667	0.2963	0.2997	0.316	0.2826	0.1775	0.0082	0.0061	0.2493	0.217844	0.2856	0.3622	0.4031	0.3678	0.3693	0.3673	0.2904	0.0658	0.2886	-0.0997	-0.0913	-0.1121
chr1:48003898-48004756 (-) // 98.51 // p33	hypothetical LOC388630	LOC388630	244472_at	0.2175	0.2195	0.2544	0.3594	0.2687	0.1443	0.0679	0.2949	0.3061	0.2926	0.2702	0.3063	0.2034	0.0413	0.0369	0.1967	0.217506	0.2905	0.2961	0.3682	0.2603	0.2643	0.2638	0.2088	0.0451	0.194	-0.0142	-0.0105	-0.0014
chr3:148708431-148710339 (+) // 61.62 // q24	hypothetical gene supported by AK054937	FLJ30375	241440_at	0.2499	0.2321	0.239	0.3121	0.3277	0.2328	0.0604	0.2438	0.2191	0.2437	0.2108	0.2414	0.1696	0.0658	0.0764	0.3541	0.217419	0.1166	0.1741	0.2767	0.1976	0.1983	0.2003	0.2923	0.0792	0.2654	-0.0464	-0.0425	-0.05
chr19:51535801-51538268 (+) // 67.0 // q13.32	hypoxia inducible factor 3, alpha subunit	HIF3A	222123_s_at	0.2361	0.2395	0.1665	0.2864	0.3096	0.1355	0.0361	0.2951	0.317	0.2765	0.3127	0.2882	0.2235	0.0492	0.0661	0.2401	0.217381	0.3207	0.2687	0.297	0.1551	0.1665	0.1676	0.274	0.0319	0.2951	-0.0532	-0.0302	-0.0603
chr17:9087181-9088042 (+) // 93.89 // p13.1	netrin 1	NTN1	227816_at	0.2775	0.2729	0.2161	0.3404	0.188	0.1803	-0.0287	0.2549	0.3026	0.2804	0.2853	0.2892	0.1729	0.1313	0.1427	0.1721	0.217369	0.2993	0.2932	0.3391	0.2309	0.2339	0.2347	0.224	0.023	0.2292	0.1002	0.0907	0.0957
chr12:93994655-93996754 (-) // 79.97 // q22	FYVE, RhoGEF and PH domain containing 6	FGD6	226799_at	0.1948	0.1682	0.145	0.2479	0.2009	0.2208	0.0351	0.2395	0.2671	0.2857	0.2742	0.2805	0.2041	0.3101	0.2453	0.1582	0.217337	0.1421	0.1777	0.2369	0.1942	0.1918	0.1938	0.2224	0.0392	0.2309	0.1142	0.1092	0.1326
chr22:29830762-29833572 (-) // 89.41 // q12.2	selenoprotein M	SELM	226051_at	0.2184	0.2358	0.1751	0.2258	0.2104	0.2082	-0.0243	0.3802	0.3418	0.3383	0.3149	0.3385	0.2249	0.0365	0.0361	0.2157	0.217269	0.1066	0.1422	0.2529	0.1615	0.1647	0.1674	0.1563	-0.0102	0.1634	0.1123	0.1005	0.122
chr11:68528433-68529578 (-) // 97.02 // q13.2	MAS-related GPR, member F	MRGPRF	227727_at	0.1565	0.1685	0.1335	0.1728	0.1726	0.2286	0.052	0.4425	0.3602	0.3735	0.3336	0.3773	0.2467	0.0377	0.0478	0.1724	0.217263	0.0977	0.1228	0.212	0.1285	0.1307	0.1313	0.1069	0.0039	0.1066	-0.0305	-0.0241	-0.0185
chr3:102063965-102194984 (-) // 91.23 // q12.2	ABI gene family, member 3 (NESH) binding protein	ABI3BP	220518_at	0.2173	0.2138	0.193	0.2792	0.1674	0.1379	-0.0037	0.3754	0.3101	0.3519	0.2521	0.3804	0.247	0.0625	0.0645	0.2249	0.217106	0.288	0.3405	0.3905	0.2827	0.2809	0.2818	0.247	0.0526	0.1755	-0.0175	-0.0146	-0.012
chr13:40027816-40138734 (-) // 98.22 // q14.11	forkhead box O1	FOXO1	202724_s_at	0.2201	0.2206	0.1726	0.2423	0.2147	0.0578	-0.1026	0.3822	0.3752	0.3704	0.3691	0.3664	0.2326	0.05	0.026	0.2657	0.216444	0.2395	0.3009	0.3973	0.2694	0.2743	0.2745	0.3624	0.258	0.3664	-0.065	-0.0615	-0.0542
chr16:63572526-63574631 (-) // 61.25 // q21	---	---	215608_at	0.1939	0.1797	0.1715	0.2696	0.1617	0.1921	0.0437	0.3836	0.3354	0.3912	0.3097	0.3921	0.2865	0.0186	0.0005	0.1297	0.216219	0.2203	0.2262	0.2737	0.1779	0.1825	0.1832	0.2296	0.0676	0.2429	-0.0094	0.0047	0.0078
chr17:28282459-28292665 (+) // 79.85 // q11.2 /// chr14:58363640-58364966 (-) // 71.9 // q23.1	transmembrane protein 98	TMEM98	223170_at	0.1649	0.1395	0.1306	0.224	0.2019	0.2234	-0.0546	0.3502	0.3409	0.3169	0.342	0.3285	0.2595	0.2082	0.1901	0.0911	0.216069	0.1596	0.176	0.2238	0.1837	0.1886	0.1914	0.1614	-0.0191	0.1812	0.0824	0.0683	0.0743
chr1:103115535-103346483 (-) // 91.11 // p21.1	collagen, type XI, alpha 1	COL11A1	37892_at	0.2543	0.2405	0.2321	0.2876	0.231	0.228	0.0446	0.2778	0.2658	0.3138	0.2389	0.3138	0.1805	0.0723	0.0595	0.2154	0.215994	0.1443	0.1891	0.264	0.2263	0.2236	0.225	0.1945	0.0399	0.1794	0.0873	0.0832	0.1127
chr1:62355026-62355766 (+) // 98.26 // p31.3	InaD-like (Drosophila)	INADL	239173_at	0.2322	0.1965	0.237	0.2764	0.2524	0.1098	-0.0913	0.2855	0.284	0.2843	0.2497	0.2897	0.2657	0.1998	0.2262	0.1565	0.2159	0.2264	0.2631	0.3093	0.262	0.2646	0.2641	0.2573	0.0514	0.2033	0.1623	0.1641	0.1968
chr3:171633746-171634731 (+) // 79.74 // q26.2	claudin 11 (oligodendrocyte transmembrane protein)	CLDN11	228335_at	0.1872	0.2005	0.2024	0.2663	0.2735	0.2914	0.0473	0.3097	0.302	0.3124	0.3193	0.3005	0.2072	-0.0063	0.0032	0.2354	0.21575	0.1787	0.2126	0.314	0.2214	0.2242	0.2254	0.2516	0.0529	0.2483	-0.0955	-0.0876	-0.1018
chr17:38156832-38157371 (-) // 48.52 // q21.31	Transcribed locus	---	241684_at	0.2943	0.316	0.2043	0.2621	0.2284	0.16	-0.0169	0.2532	0.2804	0.2845	0.2544	0.2687	0.1577	0.0308	0.0405	0.4327	0.215694	0.1948	0.2196	0.3631	0.1796	0.1887	0.1882	0.307	0.0503	0.3131	-0.009	0.0019	0.0015
chr4:80226270-80448976 (+) // 89.4 // q21.21	---	---	230781_at	0.2067	0.202	0.1938	0.3012	0.2022	0.2337	0.0109	0.2661	0.327	0.3028	0.3631	0.3027	0.2151	0.0939	0.0686	0.1593	0.215569	0.1962	0.2275	0.2966	0.2056	0.2061	0.2123	0.3352	0.0968	0.393	-0.0113	-0.01	-0.0191
chr8:70576662-70735701 (+) // 98.84 // q13.2	sulfatase 1	SULF1	212353_at	0.2308	0.2151	0.1438	0.2291	0.214	0.2258	0.0048	0.2981	0.3174	0.3343	0.298	0.3332	0.2206	0.1328	0.0817	0.1671	0.215413	0.1847	0.2379	0.3077	0.2622	0.2657	0.2645	0.1852	0.0261	0.1852	0.1397	0.1276	0.1767
chr3:135557412-135572337 (-) // 99.04 // q22.1	angiomotin like 2	AMOTL2	203002_at	0.2225	0.3072	0.168	0.251	0.1805	0.323	0.0659	0.2787	0.257	0.2499	0.2213	0.2525	0.17	0.0895	0.0727	0.3356	0.215331	0.1267	0.1507	0.3	0.1523	0.1548	0.156	0.1138	-0.0229	0.1196	-0.0097	-0.0042	-0.0029
chr14:72798510-72811084 (+) // 78.17 // q24.2	papilin, proteoglycan-like sulfated glycoprotein	PAPLN	226435_at	0.1918	0.1614	0.1875	0.2734	0.1885	0.1428	-0.0516	0.3306	0.3494	0.36	0.3455	0.3604	0.2548	0.1036	0.0768	0.1662	0.215069	0.2294	0.2477	0.285	0.1811	0.1885	0.1902	0.2871	0.0887	0.2858	0.0161	0.019	0.0411
chr11:17102596-17103402 (-) // 35.86 // p15.1	Phosphoinositide-3-kinase, class 2, alpha polypeptide	PIK3C2A	241905_at	0.2717	0.203	0.2033	0.2745	0.1667	0.0995	-0.1326	0.3657	0.2968	0.4153	0.2982	0.4019	0.1516	0.0717	0.0678	0.2757	0.214425	0.2361	0.3136	0.4046	0.2659	0.2619	0.264	0.4201	0.1483	0.3806	0.0464	0.0334	0.0961
chr15:67485157-67487040 (+) // 85.73 // q23	progestin and adipoQ receptor family member V	PAQR5	242871_at	0.1767	0.1525	0.2352	0.3019	0.2945	0.2229	0.0584	0.2059	0.192	0.2139	0.2256	0.2039	0.2139	0.3043	0.2498	0.1771	0.214281	0.1365	0.1396	0.2143	0.1477	0.149	0.1526	0.3501	0.1009	0.3464	0.0071	0.0073	0.0229
chr8:97866265-98224587 (+) // 98.64 // q22.1	plasma glutamate carboxypeptidase	PGCP	208454_s_at	0.2261	0.2024	0.2012	0.2467	0.2548	0.18	0.0117	0.3695	0.3353	0.356	0.326	0.3396	0.2349	-0.0765	-0.0409	0.2611	0.214244	0.2049	0.2964	0.3925	0.351	0.355	0.3563	0.2634	0.0556	0.2632	-0.0629	-0.0605	-0.0731
chr3:106568811-106778436 (+) // 98.45 // q13.11	activated leukocyte cell adhesion molecule	ALCAM	201952_at	0.2888	0.2978	0.1863	0.2881	0.2177	0.3249	0.1058	0.1967	0.2357	0.2278	0.2378	0.2259	0.1488	0.1682	0.1435	0.1339	0.214231	0.1853	0.2322	0.2863	0.2278	0.2273	0.2303	0.2114	0.0605	0.2199	0.2074	0.1899	0.2118
chr12:7515042-7547639 (-) // 92.12 // p13.31	CD163 molecule	CD163	216233_at	0.2342	0.2165	0.2748	0.2963	0.2956	0.1875	-0.0136	0.2771	0.2731	0.2779	0.2764	0.2706	0.2108	0.038	0.0468	0.2619	0.213994	0.2705	0.3491	0.433	0.411	0.4083	0.4068	0.3223	0.2566	0.3258	-0.0406	-0.0378	-0.0416
chr5:122386766-122400300 (-) // 91.73 // q23.2	peptidylprolyl isomerase C (cyclophilin C)	PPIC	204517_at	0.2129	0.2608	0.1713	0.226	0.1361	0.2659	0.0901	0.2046	0.2216	0.2393	0.1852	0.2357	0.1351	0.3742	0.2896	0.1754	0.213987	0.0842	0.1312	0.2312	0.1822	0.1813	0.1847	0.097	-0.0294	0.098	0.2488	0.2315	0.2976
chr15:68736326-68842849 (-) // 99.21 // q23	uveal autoantigen with coiled-coil domains and ankyrin repeats	UACA	223279_s_at	0.3436	0.4245	0.1278	0.2232	0.1618	0.1886	0.0749	0.2443	0.2435	0.2571	0.2124	0.2586	0.1669	0.0887	0.0695	0.3343	0.213731	0.0982	0.1254	0.2098	0.1196	0.1189	0.1214	0.0862	-0.0312	0.0945	0.0682	0.0645	0.1017
chr2:205464750-205466438 (+) // 19.76 // q33.2	Transcribed locus	---	1569941_at	0.2667	0.2323	0.2029	0.2171	0.1798	0.1195	0.0271	0.3125	0.26	0.3459	0.2647	0.3183	0.2351	0.0711	0.0782	0.2859	0.213569	0.1825	0.2616	0.3301	0.2401	0.2318	0.2315	0.2654	0.0843	0.2248	0.0065	0.0111	0.0252
chr1:155151793-155152842 (+) // 32.4 // q23.1	platelet endothelial aggregation receptor 1	PEAR1	228618_at	0.218	0.2381	0.2013	0.2417	0.283	0.2287	0.0537	0.2953	0.2892	0.2895	0.2715	0.2827	0.2366	0.0092	-0.0052	0.2831	0.213525	0.1706	0.2424	0.3523	0.2828	0.2831	0.2835	0.1987	0.0613	0.1948	-0.078	-0.0768	-0.0787
chr1:201711576-201723272 (+) // 91.74 // q32.1	proline/arginine-rich end leucine-rich repeat protein	PRELP	37022_at	0.1828	0.2056	0.2293	0.2249	0.1923	0.1249	-0.023	0.3921	0.3218	0.3155	0.2731	0.3134	0.2785	0.0272	0.076	0.2818	0.213513	0.1964	0.2384	0.3222	0.2421	0.2529	0.2527	0.1706	-0.0304	0.1929	0.0044	0.0276	-0.0056
chr17:26603686-26605417 (+) // 82.32 // q11.2	Neurofibromin 1 (neurofibromatosis, von Recklinghausen disease, Watson disease)	NF1	216115_at	0.2278	0.2106	0.2064	0.2772	0.1664	0.1217	-0.1826	0.3688	0.3393	0.3739	0.32	0.3647	0.1912	0.0887	0.0704	0.2709	0.213462	0.2368	0.2257	0.3505	0.2008	0.2003	0.2029	0.262	0.0179	0.2664	0.0883	0.0759	0.1111
chr22:38090120-38104332 (+) // 75.06 // q13.1	synaptogyrin 1	SYNGR1	213854_at	0.2126	0.1864	0.2463	0.2952	0.2614	0.2118	0.0872	0.2965	0.2967	0.2861	0.319	0.2876	0.274	-0.0081	0.0379	0.1216	0.213262	0.1883	0.2126	0.2371	0.1678	0.175	0.1759	0.3083	0.0166	0.2746	-0.0637	-0.047	-0.084
chr2:220128123-220132397 (-) // 76.92 // q35	obscurin-like 1	OBSL1	227574_at	0.2322	0.2473	0.2147	0.2846	0.199	0.1929	-0.1028	0.3523	0.3452	0.3206	0.3242	0.3258	0.2194	-0.0187	0.0006	0.2692	0.212906	0.2371	0.2169	0.3048	0.1899	0.1987	0.1998	0.1766	-0.0273	0.1961	0.066	0.0694	0.0599
chr3:73622087-73622819 (-) // 97.78 // p13	Transcribed locus	---	244496_at	0.2054	0.1833	0.1708	0.2272	0.2502	0.0834	0.2223	0.376	0.3124	0.3261	0.3134	0.3196	0.2737	-0.0444	-0.0045	0.188	0.212681	0.2068	0.2339	0.2587	0.1673	0.1646	0.1654	0.2131	0.0477	0.2071	-0.0681	-0.0488	-0.0456
chr5:122387388-122400300 (-) // 86.52 // q23.2	peptidylprolyl isomerase C (cyclophilin C)	PPIC	204518_s_at	0.2156	0.2289	0.1567	0.2099	0.1994	0.3225	0.1357	0.2196	0.206	0.2183	0.1779	0.2121	0.1586	0.3003	0.2823	0.1536	0.212338	0.0565	0.122	0.2089	0.2072	0.2052	0.2102	0.0811	-0.0412	0.0877	0.209	0.1904	0.2144
chr15:69382163-69385665 (+) // 86.08 // q23	CDNA FLJ12379 fis, clone MAMMA1002554	---	215397_x_at	0.2296	0.1722	0.1429	0.2598	0.189	0.0999	-0.0157	0.3581	0.3209	0.3622	0.3022	0.3661	0.2492	0.0899	0.0933	0.1775	0.212319	0.2195	0.2193	0.3074	0.1802	0.1823	0.1854	0.2616	0.0515	0.2644	0.2005	0.2096	0.2483
chr8:49992879-49996705 (-) // 94.03 // q11.21	snail homolog 2 (Drosophila)	SNAI2	213139_at	0.186	0.2011	0.1274	0.1932	0.1141	0.4132	0.1311	0.2685	0.2437	0.2787	0.2616	0.275	0.2074	0.1661	0.1153	0.2079	0.211894	0.0621	0.0991	0.189	0.1505	0.1501	0.152	0.073	-0.0123	0.0759	-0.0221	-0.0225	-0.0218
chr6:7485682-7486194 (-) // 99.42 // p24.3	hypothetical protein LOC100131914	LOC100131914	240382_at	0.2279	0.2515	0.2547	0.3473	0.2385	0.2931	0.1246	0.1698	0.1857	0.1911	0.2093	0.1845	0.1415	0.2299	0.1765	0.1601	0.211625	0.1247	0.1961	0.2857	0.2513	0.2491	0.2515	0.2263	0.0656	0.2184	0.0217	0.0277	0.0382
chr6:128793778-128795606 (+) // 61.95 // q22.33	Transcribed locus	---	233976_at	0.2604	0.2196	0.2541	0.2851	0.2633	0.1458	-0.0392	0.2758	0.2673	0.3118	0.2387	0.2987	0.2223	0.0502	0.0495	0.2769	0.211269	0.2337	0.2982	0.3597	0.2942	0.2855	0.2851	0.4032	0.2605	0.371	-0.0686	-0.0707	-0.0594
chr11:111079276-111106789 (+) // 87.18 // q23.1	SNF1-like kinase 2	SNF1LK2	213221_s_at	0.2834	0.3791	0.1823	0.2734	0.1546	0.1314	-0.0761	0.2661	0.319	0.3029	0.2804	0.2926	0.1223	0.0194	-0.0129	0.4619	0.211238	0.2995	0.3005	0.4441	0.2394	0.2447	0.2447	0.2508	0.0812	0.2538	-0.0872	-0.0862	-0.0833
chr1:23627646-23638292 (-) // 98.37 // p36.12	development and differentiation enhancing factor-like 1	DDEFL1	222236_s_at	0.2778	0.2903	0.1919	0.2314	0.1796	0.1398	-0.0531	0.3046	0.2753	0.2963	0.2444	0.2914	0.176	0.1339	0.164	0.2313	0.210931	0.2319	0.2439	0.3086	0.2338	0.24	0.239	0.1113	-0.0537	0.1046	0.1247	0.1241	0.1091
chrX:71056628-71057050 (+) // 97.9 // q13.1	---	---	238203_at	0.2674	0.2263	0.2071	0.2929	0.325	0.1679	0.1255	0.2455	0.2607	0.2461	0.2158	0.2662	0.2374	0.0592	0.0572	0.1741	0.210894	0.2723	0.2927	0.3028	0.1944	0.1966	0.1977	0.3308	0.1003	0.2791	-0.0226	-0.0166	-0.0204
chr15:86321601-86322343 (-) // 96.6 // q25.3	neurotrophic tyrosine kinase, receptor, type 3	NTRK3	228849_at	0.2337	0.1993	0.2168	0.322	0.3105	0.1653	0.0663	0.2632	0.28	0.2676	0.3011	0.2704	0.2016	0.0151	0.0191	0.2404	0.210775	0.2898	0.3198	0.3467	0.2254	0.2301	0.2321	0.2874	0.0558	0.281	-0.0957	-0.0747	-0.1032
chr7:150711932-150712934 (-) // 49.75 // q36.1	CDNA FLJ38906 fis, clone NT2NE2004378	---	235246_at	0.1814	0.1805	0.2086	0.2926	0.2827	0.179	0.0478	0.2944	0.2749	0.233	0.2615	0.2399	0.3129	0.0792	0.1176	0.1843	0.210644	0.2305	0.2056	0.2474	0.16	0.1706	0.1729	0.3005	0.0966	0.3161	-0.0642	-0.0247	-0.0865
chr1:217434591-217435414 (+) // 78.57 // q41	Transcribed locus	---	236409_at	0.2442	0.2171	0.267	0.287	0.272	0.1694	0.0372	0.2517	0.2994	0.2595	0.2758	0.2652	0.2292	0.023	0.0547	0.2073	0.209981	0.2088	0.3308	0.3248	0.2726	0.2683	0.2688	0.4319	0.2825	0.3958	-0.0436	-0.0406	-0.0392
chr20:43314292-43316616 (-) // 85.35 // q13.12	secretory leukocyte peptidase inhibitor	SLPI	203021_at	0.2988	0.2673	0.2386	0.3018	0.1493	0.1042	-0.0152	0.1603	0.1817	0.1896	0.1898	0.1925	0.1286	0.4342	0.4707	0.0659	0.209881	0.1591	0.206	0.2157	0.1825	0.1885	0.1885	0.19	0.0291	0.1946	0.4284	0.4205	0.4234
chr8:97575071-97693337 (+) // 97.3 // q22.1	syndecan 2	SDC2	212157_at	0.2669	0.2684	0.2053	0.2668	0.2572	0.2414	0.0602	0.2738	0.2618	0.2827	0.2671	0.2598	0.1968	-0.0461	-0.0298	0.3186	0.209431	0.1731	0.287	0.3837	0.3556	0.3548	0.3574	0.218	0.0345	0.2239	-0.0721	-0.0696	-0.0756
chr8:91703403-91706592 (-) // 98.01 // q21.3	transmembrane protein 64	TMEM64	225972_at	0.2737	0.3229	0.1872	0.2582	0.1952	0.1817	0.0385	0.2522	0.2567	0.2954	0.2895	0.278	0.1548	0.0385	0.0092	0.3171	0.2093	0.1282	0.1996	0.3269	0.2227	0.2215	0.2216	0.2623	0.1587	0.2742	-0.0839	-0.0874	-0.0806
chr10:49896496-49897354 (-) // 98.03 // q11.22	chromosome 10 open reading frame 72	C10orf72	244058_at	0.1813	0.1759	0.147	0.2112	0.2722	0.2576	0.181	0.2724	0.2957	0.2857	0.333	0.2749	0.2488	0.0061	0.0236	0.1814	0.209238	0.0637	0.1183	0.1946	0.1839	0.1858	0.1878	0.2118	0.0437	0.2455	-0.052	-0.0465	-0.054
chr5:167113346-167113658 (+) // 98.42 // q34	---	---	241883_x_at	0.2192	0.1833	0.1792	0.288	0.2127	0.173	0.0104	0.264	0.3106	0.3129	0.2958	0.3076	0.2153	0.0858	0.0667	0.2233	0.209237	0.2149	0.2516	0.3215	0.2378	0.2363	0.2386	0.3053	0.0826	0.2787	-0.0395	-0.0367	-0.0418
chr8:69613691-69613997 (+) // 96.53 // q13.2	Transcribed locus	---	242910_x_at	0.3019	0.2522	0.1914	0.2943	0.223	0.1901	0.089	0.2402	0.2099	0.2595	0.2341	0.2531	0.1616	0.0942	0.0914	0.257	0.208931	0.1486	0.2129	0.3068	0.2042	0.2019	0.2044	0.3922	0.1777	0.3686	-0.0332	-0.0331	-0.0284
chr8:119146532-119147577 (-) // 59.75 // q24.11	Transcribed locus	---	242126_at	0.219	0.1929	0.1659	0.2652	0.1962	0.1627	-0.032	0.3143	0.2839	0.3386	0.2784	0.3342	0.1906	0.1269	0.1102	0.1956	0.208913	0.2664	0.3356	0.406	0.3049	0.3025	0.3065	0.217	0.094	0.2254	0.0354	0.0417	0.0551
chr16:65738582-65740612 (-) // 99.16 // q22.1	hypothetical protein MGC4655	MGC4655	226058_at	0.2067	0.2223	0.1668	0.2257	0.2052	0.3685	0.2505	0.2426	0.2427	0.266	0.2557	0.2621	0.1781	0.0716	0.0453	0.127	0.20855	0.0868	0.1367	0.209	0.1698	0.1687	0.1711	0.1229	0.1362	0.1506	-0.0022	0.006	0.0201
chr8:17440682-17466945 (+) // 97.76 // p22	solute carrier family 7 (cationic amino acid transporter, y+ system), member 2	SLC7A2	207626_s_at	0.2298	0.2106	0.3383	0.2494	0.3918	0.1982	0.1155	0.2086	0.1709	0.1722	0.2134	0.1509	0.2461	0.0734	0.1433	0.2233	0.208481	0.1027	0.2611	0.2709	0.3727	0.3754	0.3797	0.3115	0.1206	0.3208	-0.0316	-0.0233	-0.0428
chr5:156122472-156123960 (+) // 99.07 // q33.3	sarcoglycan, delta (35kDa dystrophin-associated glycoprotein)	SGCD	228602_at	0.3247	0.3407	0.1596	0.1661	0.1616	0.1517	-0.0175	0.3466	0.3109	0.3032	0.2758	0.312	0.2974	0.0059	0.036	0.16	0.208419	0.1244	0.1643	0.2058	0.1784	0.1831	0.1827	0.1509	0.0237	0.1409	-0.0102	0.0013	-0.0047
chrX:73381040-73381803 (-) // 89.53 // q13.2	CDNA clone IMAGE:4328048	---	239008_at	0.2248	0.185	0.307	0.2288	0.2624	0.1164	-0.0133	0.3436	0.2535	0.2745	0.237	0.2499	0.3576	-0.0033	0.0679	0.2352	0.207937	0.1352	0.2667	0.3035	0.3449	0.3403	0.34	0.3601	0.2335	0.3635	-0.0426	-0.0339	-0.0272
chr17:64097457-64097902 (-) // 91.12 // q24.2	Transcribed locus	---	243221_at	0.2295	0.2244	0.271	0.2958	0.2059	0.1638	-0.0474	0.2657	0.2875	0.262	0.3504	0.2602	0.2651	0.0772	0.0716	0.1438	0.207906	0.2647	0.3007	0.2856	0.2043	0.2138	0.2155	0.2821	0.0893	0.3177	0.0087	0.0215	0.0086
chr7:30758275-30762564 (+) // 43.18 // p15.1	indolethylamine N-methyltransferase	INMT	224061_at	0.2434	0.2653	0.2157	0.2881	0.2124	0.132	0.0133	0.3124	0.3199	0.3137	0.2658	0.318	0.1745	0.0153	0.0109	0.2249	0.20785	0.3646	0.4503	0.5291	0.4652	0.4645	0.4585	0.2232	0.0534	0.1918	-0.0034	0.0027	0.01
chr2:215933832-216008690 (-) // 98.88 // q35	fibronectin 1	FN1	212464_s_at	0.1753	0.1664	0.1335	0.2102	0.2331	0.3536	0.0507	0.3166	0.2959	0.3242	0.2742	0.3316	0.2591	0.0312	0.0078	0.1593	0.207669	0.1252	0.1727	0.2659	0.2039	0.2048	0.2087	0.1415	-0.0113	0.1558	0.1296	0.1277	0.1597
chr8:118880858-119193238 (-) // 96.49 // q24.11	exostoses (multiple) 1	EXT1	201995_at	0.1819	0.1964	0.1394	0.2274	0.2619	0.3798	0.2035	0.236	0.2128	0.2114	0.1997	0.2174	0.2301	0.1627	0.1549	0.104	0.207456	0.118	0.1714	0.2207	0.1966	0.1961	0.1981	0.0971	-0.0036	0.0939	-0.0091	-0.0069	0.0023
chr1:201576379-201584026 (-) // 98.95 // q32.1	fibromodulin	FMOD	202709_at	0.2492	0.3187	0.2027	0.227	0.1333	0.0667	-0.0889	0.3158	0.3043	0.3179	0.2597	0.3069	0.1509	0.0671	0.0708	0.4162	0.207394	0.1647	0.2054	0.347	0.1932	0.199	0.1981	0.1631	0.0114	0.1705	0.0734	0.0659	0.0911
chr17:43493115-43493848 (+) // 88.99 // q21.32	nuclear factor (erythroid-derived 2)-like 1	NFE2L1	214179_s_at	0.3072	0.3726	0.1456	0.2428	0.2226	0.1641	0.1159	0.2615	0.2595	0.2559	0.2452	0.2551	0.1351	0.0581	0.0453	0.2306	0.207319	0.1443	0.1705	0.2878	0.178	0.1802	0.1813	0.2075	0.1137	0.2409	-0.0512	-0.0461	-0.0438
chr2:215933833-215936012 (-) // 67.89 // q35	fibronectin 1	FN1	216442_x_at	0.1743	0.1665	0.1323	0.2116	0.2361	0.3537	0.0472	0.3167	0.2968	0.32	0.2737	0.3285	0.2593	0.0291	0.0094	0.1601	0.207206	0.1285	0.1731	0.2638	0.2019	0.2034	0.2073	0.1384	-0.0135	0.1528	0.1291	0.1265	0.1563
chr11:125332415-125335211 (-) // 89.92 // q24.2	Cdon homolog (mouse)	CDON	227526_at	0.2644	0.2798	0.1649	0.2277	0.1279	0.1338	-0.0952	0.3511	0.3345	0.3626	0.3188	0.351	0.1709	0.0097	0.0026	0.31	0.207156	0.2428	0.2712	0.3487	0.2548	0.2588	0.2582	0.1642	0.0092	0.1685	-0.0218	-0.0237	-0.023
chr7:39296371-39297139 (+) // 96.23 // p14.1	Homo sapiens, clone IMAGE:4499056	---	1563169_at	0.2256	0.2001	0.1174	0.2647	0.2113	0.1476	0.0522	0.2645	0.2914	0.3054	0.3034	0.3097	0.2231	0.115	0.1001	0.1784	0.206869	0.2052	0.193	0.2763	0.1481	0.1521	0.1541	0.3116	0.0858	0.3111	0.0093	0.0263	0.0091
chr6:144189497-144190010 (+) // 95.13 // q24.2	phosphatase and actin regulator 2	PHACTR2	244774_at	0.2175	0.2	0.2353	0.2813	0.3089	0.1905	0.0748	0.2781	0.2246	0.2352	0.2078	0.2239	0.2501	0.064	0.0974	0.2177	0.206694	0.1372	0.2199	0.2964	0.2674	0.2675	0.267	0.2776	0.1238	0.2724	-0.0455	-0.0413	-0.055
chr16:30815433-30822262 (+) // 76.02 // p11.2	cardiotrophin 1	CTF1	206813_at	0.2382	0.267	0.1237	0.1837	0.2743	0.2837	0.1448	0.3075	0.281	0.2591	0.2677	0.2576	0.1983	-0.0081	0.0427	0.1852	0.20665	0.1475	0.1513	0.2086	0.15	0.1561	0.1561	0.1068	-0.0414	0.123	0.051	0.0603	0.0423
chr12:13240923-13260974 (+) // 98.6 // p13.1	epithelial membrane protein 1	EMP1	201324_at	0.2218	0.2828	0.1442	0.2036	0.1354	0.1987	0.0493	0.2028	0.2267	0.2099	0.1947	0.2048	0.1454	0.2711	0.243	0.3708	0.206562	0.1217	0.1634	0.292	0.1842	0.1867	0.1877	0.1342	0.0107	0.1463	0.0095	0.0129	0.0335
chr2:215933833-215948660 (-) // 89.45 // q35	fibronectin 1	FN1	210495_x_at	0.1728	0.1639	0.1318	0.2103	0.235	0.3503	0.0454	0.3162	0.2961	0.3203	0.2731	0.3287	0.258	0.0286	0.0095	0.1602	0.206263	0.1283	0.1739	0.2634	0.2018	0.2034	0.2072	0.1372	-0.0146	0.1516	0.13	0.1275	0.1575
chr6:42772317-42798287 (-) // 99.16 // p21.1	peripherin 2 (retinal degeneration, slow)	PRPH2	206625_at	0.3875	0.4227	0.1669	0.2255	0.211	0.1428	-0.0129	0.2654	0.268	0.2631	0.2541	0.2578	0.2004	-0.0072	0.0111	0.2428	0.206187	0.2093	0.2502	0.2845	0.2329	0.2377	0.236	0.2015	0.0943	0.2018	-0.076	-0.054	-0.0881
chr2:69158040-69329961 (+) // 90.51 // p14	anthrax toxin receptor 1	ANTXR1	224694_at	0.1348	0.1432	0.1167	0.1915	0.1	0.2102	-0.0044	0.4005	0.362	0.3841	0.301	0.3928	0.2249	0.0925	0.0718	0.1747	0.206019	0.1134	0.1416	0.2413	0.1537	0.1579	0.1601	0.0692	-0.0477	0.0783	0.1391	0.134	0.1689
chr7:150899122-150902978 (-) // 58.69 // q36.1	Protein kinase, AMP-activated, gamma 2 non-catalytic subunit	PRKAG2	215231_at	0.2344	0.2159	0.3262	0.263	0.3072	0.1377	0.0207	0.2601	0.1987	0.261	0.2101	0.2327	0.1709	0.0662	0.1005	0.2897	0.205937	0.0911	0.1863	0.2822	0.2406	0.2353	0.2394	0.3832	0.1655	0.4254	-0.045	-0.0448	-0.0361
chr17:74360653-74361374 (-) // 82.89 // q25.3	TIMP metallopeptidase inhibitor 2	TIMP2	231579_s_at	0.1271	0.1784	0.1146	0.1897	0.1415	0.2498	0.0082	0.4006	0.381	0.3691	0.3368	0.3785	0.2522	-0.049	-0.0593	0.2738	0.205813	0.1581	0.152	0.2838	0.1365	0.1444	0.1466	0.1039	0.0419	0.1276	-0.045	-0.0356	-0.0395
chr2:239888119-239893891 (-) // 91.31 // q37.3	---	---	1558385_at	0.2611	0.2636	0.2036	0.2543	0.2227	0.0853	-0.0673	0.3305	0.2837	0.3111	0.2715	0.312	0.2077	0.0656	0.083	0.2033	0.205731	0.2751	0.2209	0.2931	0.1669	0.1699	0.1705	0.2739	0.2746	0.3063	-0.0074	0.0073	0.012
chr1:206420149-206420706 (-) // 66.61 // q32.2	Transcribed locus	---	243890_at	0.2315	0.2143	0.1469	0.2735	0.2461	0.1149	-0.0062	0.2959	0.3018	0.3001	0.27	0.3063	0.1785	0.113	0.1232	0.1814	0.2057	0.4474	0.3394	0.3609	0.1971	0.2036	0.2033	0.2402	0.0433	0.2528	-0.0121	0.005	-0.0107
chr7:128795249-128854288 (+) // 97.12 // q32.1	S-adenosylhomocysteine hydrolase-like 2	AHCYL2	215672_s_at	0.239	0.1856	0.2334	0.2328	0.2939	0.1345	0.0796	0.1779	0.184	0.1831	0.1968	0.1596	0.167	0.344	0.3518	0.1276	0.205662	0.1594	0.3087	0.2481	0.4016	0.4004	0.4007	0.2505	0.0706	0.2375	0.0301	0.0237	0.0276
chr12:55808548-55893441 (+) // 98.09 // q13.3	low density lipoprotein-related protein 1 (alpha-2-macroglobulin receptor) /// similar to low density lipoprotein-related protein 1 (alpha-2-macroglobulin receptor)	LOC100134190 /// LRP1	200784_s_at	0.1995	0.1985	0.1673	0.1828	0.231	0.1375	0.0402	0.3798	0.3034	0.3289	0.2664	0.3153	0.1906	-0.0113	0.039	0.3195	0.205525	0.1562	0.1963	0.3065	0.2111	0.2161	0.2174	0.129	-0.0166	0.1405	-0.0149	-0.0085	-0.0211
chr12:8691750-8706668 (-) // 99.45 // p13.31	microfibrillar associated protein 5	MFAP5	209758_s_at	0.2303	0.2483	0.1714	0.1846	0.1539	0.2227	0.0291	0.3177	0.2785	0.3059	0.2515	0.2933	0.1837	0.0564	0.0672	0.2936	0.205506	0.1447	0.2628	0.3543	0.3353	0.3372	0.3345	0.1367	0.0209	0.1269	0.0007	-0.0003	0.0059
chr11:121471817-121473392 (-) // 74.99 // q24.1	CDNA FLJ38472 fis, clone FEBRA2022148	---	232113_at	0.2146	0.1937	0.244	0.2468	0.2003	0.2376	0.0069	0.3315	0.2656	0.3408	0.2576	0.325	0.1698	0.0065	0.0112	0.2349	0.205425	0.1198	0.1704	0.2421	0.1734	0.171	0.172	0.1803	0.0112	0.1774	-0.0542	-0.0552	-0.0427
chr15:94675757-94683136 (+) // 89.93 // q26.2	nuclear receptor subfamily 2, group F, member 2	NR2F2	209120_at	0.1418	0.1885	0.1415	0.2268	0.1232	0.2012	0.0145	0.3847	0.3382	0.3363	0.3037	0.3455	0.2482	0.0775	0.0309	0.1833	0.205363	0.0982	0.1186	0.2411	0.1319	0.1373	0.1389	0.079	-0.0325	0.0853	0.1028	0.0969	0.1306
chr17:37807992-37829061 (-) // 84.76 // q21.31	polymerase I and transcript release factor	PTRF	208789_at	0.168	0.2474	0.1189	0.1885	0.2349	0.2765	0.0486	0.3265	0.3049	0.27	0.2554	0.2804	0.2521	0.0065	0.0112	0.296	0.205362	0.1173	0.1122	0.2486	0.1004	0.1063	0.1084	0.074	-0.0278	0.0927	-0.0566	-0.0481	-0.0693
chrX:80824065-80824699 (+) // 43.34 // q21.1 /// chr2:215933831-215943317 (-) // 94.05 // q35	fibronectin 1	FN1	211719_x_at	0.1699	0.1627	0.13	0.2082	0.2242	0.3328	0.0387	0.3184	0.2974	0.3231	0.271	0.3328	0.2548	0.0402	0.0169	0.1635	0.205287	0.1313	0.1755	0.2684	0.2001	0.202	0.2058	0.1356	-0.0169	0.1492	0.1387	0.136	0.171
chr11:121465027-121476398 (-) // 86.51 // q24.1	hypothetical gene supported by BX647608	LOC399959	225381_at	0.1962	0.2309	0.1993	0.2426	0.1859	0.3326	0.0155	0.3189	0.3055	0.2993	0.3021	0.2956	0.1861	-0.0176	-0.0316	0.2198	0.205069	0.1339	0.1632	0.2583	0.1796	0.1805	0.1814	0.1508	0.0066	0.1543	-0.1011	-0.0976	-0.1042
chr11:65062140-65063052 (-) // 80.25 // q13.1	latent transforming growth factor beta binding protein 3	LTBP3	227308_x_at	0.2061	0.2057	0.2141	0.2923	0.1996	0.2064	-0.0015	0.3245	0.3066	0.3232	0.2713	0.3294	0.1992	-0.0105	-0.0102	0.2209	0.204819	0.1761	0.2035	0.296	0.1973	0.2006	0.2011	0.2209	0.0252	0.1782	0.067	0.0763	0.0974
chr12:26113473-26117069 (+) // 97.0 // p12.1	Ras association (RalGDS/AF-6) domain family (N-terminal) member 8	RASSF8	225946_at	0.2048	0.2375	0.1493	0.2409	0.1843	0.3246	0.1914	0.2684	0.2877	0.2669	0.2954	0.2622	0.2219	-0.0203	-0.0432	0.2027	0.204656	0.094	0.1461	0.1981	0.1549	0.1536	0.1563	0.158	0.0287	0.1799	-0.101	-0.0924	-0.0982
chr11:44908196-44909463 (+) // 56.47 // p11.2	tetraspanin 18	TSPAN18	228819_at	0.2252	0.2245	0.2766	0.2638	0.3095	0.1433	-0.0604	0.3186	0.2981	0.2642	0.2621	0.2629	0.2701	-0.0304	0.0087	0.234	0.204425	0.2365	0.305	0.3565	0.3355	0.343	0.339	0.3173	0.1014	0.2437	-0.1036	-0.0885	-0.1211
chr17:74360202-74362558 (-) // 95.09 // q25.3	TIMP metallopeptidase inhibitor 2	TIMP2	224560_at	0.1358	0.1785	0.1072	0.176	0.1458	0.2623	-0.01	0.4027	0.3674	0.3743	0.3306	0.3803	0.2455	-0.0516	-0.0481	0.2671	0.203988	0.1424	0.138	0.2707	0.1382	0.1455	0.1487	0.0909	0.0496	0.1185	-0.0174	-0.011	-0.0218
chr2:120551071-120653165 (+) // 96.92 // q14.2	erythrocyte membrane protein band 4.1 like 5	EPB41L5	225855_at	0.2519	0.2768	0.2041	0.2753	0.1936	0.2163	-0.0916	0.2787	0.3143	0.3049	0.3483	0.2968	0.215	-0.0723	-0.0702	0.3217	0.203975	0.1566	0.1937	0.3084	0.225	0.2245	0.2275	0.2794	0.0872	0.3008	-0.0955	-0.0975	-0.0963
chr12:63958788-64143435 (+) // 94.28 // q14.3	methionine sulfoxide reductase B3	MSRB3	1554127_s_at	0.2788	0.3254	0.1529	0.1593	0.2186	0.2825	0.1176	0.3121	0.2562	0.2379	0.2269	0.2312	0.2388	-0.0743	-0.0391	0.3385	0.203956	0.0559	0.1251	0.1973	0.1886	0.1882	0.1897	0.0992	0.0033	0.1111	-0.1128	-0.1025	-0.1287
chr11:109952976-110088174 (-) // 99.12 // q22.3	Rho GTPase activating protein 20	ARHGAP20	228368_at	0.2274	0.2435	0.1558	0.2667	0.2802	0.1448	0.0517	0.2666	0.2752	0.2807	0.2959	0.2656	0.1495	0.0031	0.0067	0.3474	0.2038	0.1356	0.1632	0.3013	0.1824	0.1836	0.1831	0.2779	0.081	0.3092	-0.0972	-0.0839	-0.1024
chr4:38304423-38314076 (-) // 11.44 // p14	hypothetical FLJ13197	FLJ13197	1570414_x_at	0.2499	0.1802	0.1279	0.2071	0.1521	0.0535	-0.0423	0.4037	0.3244	0.3992	0.2914	0.4039	0.2201	0.0544	0.0734	0.1577	0.203537	0.2297	0.2282	0.2858	0.1661	0.1706	0.1706	0.2602	0.0211	0.2109	0.0712	0.0762	0.1262
chr11:2106922-2116578 (-) // 78.23 // p15.5	insulin-like growth factor 2 (somatomedin A)	IGF2	202409_at	0.2155	0.2121	0.2044	0.2622	0.245	0.1703	0.0016	0.2603	0.2535	0.2723	0.2456	0.2729	0.1581	0.1093	0.0878	0.2843	0.20345	0.1582	0.1911	0.3164	0.2039	0.206	0.2095	0.2146	0.0343	0.2047	-0.0119	-0.0079	-0.0127
chr11:113443527-113443992 (+) // 75.97 // q23.2	---	---	244697_at	0.2378	0.2135	0.1835	0.2567	0.2059	0.093	-0.0142	0.3644	0.3341	0.3337	0.2932	0.34	0.1852	-0.0024	0.0242	0.2065	0.203444	0.37	0.3197	0.3759	0.2198	0.2249	0.2257	0.2835	0.1267	0.2781	-0.0428	-0.03	-0.0292
chr20:43895880-43905321 (+) // 71.41 // q13.12	sorting nexin family member 21	SNX21	1553960_at	0.2556	0.3843	0.1753	0.1892	0.1088	0.2187	-0.0261	0.2623	0.2786	0.2809	0.2483	0.2691	0.1301	0.0531	0.0267	0.3943	0.203075	0.1327	0.1499	0.3106	0.1363	0.1393	0.1398	0.1195	0.0075	0.1187	-0.0841	-0.0788	-0.0688
chr18:50719791-50777635 (-) // 87.12 // q21.2	coiled-coil domain containing 68	CCDC68	220180_at	0.2174	0.1873	0.1299	0.2244	0.207	0.1701	-0.0113	0.1889	0.2253	0.2256	0.2486	0.2203	0.1441	0.4183	0.3288	0.1245	0.203075	0.3199	0.3351	0.2785	0.2121	0.2149	0.218	0.2731	0.0633	0.3024	0.0725	0.0625	0.094
chr2:121271334-121465426 (+) // 96.22 // q14.2	GLI-Kruppel family member GLI2	GLI2	207034_s_at	0.2436	0.2112	0.111	0.1834	0.1649	0.3088	0.0803	0.3057	0.2567	0.2826	0.2768	0.2867	0.2362	0.0159	0.0247	0.2558	0.202769	0.108	0.1238	0.1629	0.1085	0.1103	0.1117	0.1163	-0.0039	0.1134	-0.0441	-0.0402	-0.0438
chr6:112536769-112682495 (-) // 99.87 // q21	laminin, alpha 4	LAMA4	202202_s_at	0.1877	0.2622	0.1729	0.2038	0.1603	0.1655	-0.0468	0.3445	0.3174	0.3387	0.2564	0.3365	0.2027	-0.0204	-0.0252	0.3874	0.202725	0.09	0.1159	0.2904	0.128	0.1308	0.1331	0.1179	-0.0071	0.1214	-0.0341	-0.0382	-0.0185
chr1:217452207-217452828 (+) // 29.77 // q41	lysophospholipase-like 1	LYPLAL1	230174_at	0.2434	0.2657	0.1885	0.2761	0.2217	0.1558	-0.0615	0.2607	0.3254	0.318	0.3323	0.3105	0.1663	-0.0034	-0.024	0.2678	0.202706	0.2317	0.3003	0.3945	0.2799	0.2798	0.2814	0.3797	0.1033	0.3725	-0.0705	-0.0756	-0.0768
chr3:121595816-121652515 (-) // 96.18 // q13.33	follistatin-like 1	FSTL1	208782_at	0.1935	0.2499	0.1289	0.1796	0.1899	0.3369	0.045	0.311	0.2751	0.3019	0.2399	0.2998	0.1878	-0.0029	-0.0027	0.3096	0.2027	0.0684	0.1001	0.2555	0.141	0.1434	0.1466	0.056	-0.0441	0.0711	0.0203	0.0161	0.0326
chr10:76827921-76828916 (-) // 91.02 // q22.2	zinc finger protein 503	ZNF503	227195_at	0.1757	0.2049	0.1956	0.3039	0.1427	0.211	-0.0043	0.3134	0.2837	0.3021	0.2451	0.3149	0.1698	0.1048	0.075	0.203	0.202581	0.1133	0.1205	0.2274	0.0943	0.0964	0.098	0.1481	-0.0075	0.1467	0.1251	0.1312	0.1691
chr17:72187165-72195830 (-) // 97.1 // q25.1 /// chr2:161904239-161905718 (-) // 86.78 // q24.2	matrix-remodelling associated 7	MXRA7	212509_s_at	0.1847	0.2358	0.1717	0.2094	0.1682	0.3057	0.0079	0.3322	0.2854	0.3131	0.2602	0.3107	0.1952	-0.0311	-0.0204	0.309	0.202356	0.0986	0.1235	0.2727	0.1488	0.1524	0.1561	0.1093	-0.043	0.1167	-0.0448	-0.0413	-0.0388
chr11:12355721-12507986 (+) // 91.63 // p15.3	parvin, alpha	PARVA	217890_s_at	0.1778	0.2392	0.1215	0.1502	0.151	0.2852	0.0538	0.3337	0.2909	0.2951	0.2509	0.2945	0.2141	0.0769	0.0635	0.2365	0.202175	0.0459	0.0889	0.2109	0.1369	0.1383	0.1407	0.0356	-0.0571	0.0497	0.0458	0.036	0.0543
chr8:97575071-97693337 (+) // 97.3 // q22.1	syndecan 2	SDC2	212158_at	0.2501	0.2667	0.2006	0.2572	0.2398	0.2249	0.0536	0.2662	0.2659	0.2766	0.2602	0.2575	0.1764	-0.0516	-0.0455	0.3362	0.202175	0.1828	0.2791	0.3927	0.3255	0.3275	0.3291	0.2004	0.0227	0.2052	-0.0685	-0.0632	-0.0671
chr4:123427252-123503357 (+) // 98.64 // q27	KIAA1109	KIAA1109	212779_at	0.2885	0.3046	0.2301	0.2539	0.2177	0.1074	-0.1892	0.2812	0.3181	0.3401	0.3244	0.3223	0.121	0.0194	-0.0261	0.3207	0.202131	0.2445	0.2994	0.4055	0.2753	0.2771	0.2779	0.3876	0.138	0.3653	-0.0793	-0.0895	-0.0582
chr13:38815029-39075201 (-) // 97.07 // q13.3	lipoma HMGIC fusion partner	LHFP	218656_s_at	0.1693	0.2447	0.1655	0.1978	0.1291	0.1767	-0.0149	0.3602	0.3362	0.3373	0.3091	0.331	0.1999	-0.0538	-0.0535	0.3993	0.202119	0.1195	0.1671	0.3342	0.1781	0.1849	0.1861	0.136	0.0036	0.1402	-0.0799	-0.0781	-0.075
chr8:72478230-72622446 (-) // 44.12 // q13.3	CDNA clone IMAGE:5264099	---	1569736_at	0.3171	0.2803	0.2014	0.2653	0.2783	0.1388	0.1222	0.2143	0.2132	0.239	0.2117	0.2298	0.1856	0.061	0.0832	0.1896	0.201925	0.1678	0.2309	0.2455	0.2516	0.2538	0.2529	0.2345	0.0589	0.2309	0.0559	0.064	0.0837
chr5:135543860-135546320 (+) // 98.48 // q31.2	SMAD family member 5	SMAD5	225219_at	0.2102	0.2396	0.1559	0.2212	0.0551	0.2419	-0.1201	0.3331	0.2784	0.321	0.2577	0.3223	0.1708	0.1478	0.1014	0.2884	0.201544	0.0958	0.1428	0.2872	0.1795	0.1801	0.1822	0.1441	-0.0298	0.1288	0.0268	0.0089	0.0448
chr5:148990826-148994724 (+) // 75.37 // q33.1	FLJ41603 protein	FLJ41603	227717_at	0.2736	0.2798	0.3892	0.3291	0.1633	0.0936	-0.0615	0.199	0.204	0.2258	0.1703	0.2219	0.0909	0.2387	0.2251	0.1779	0.201294	0.1898	0.2139	0.2755	0.1896	0.193	0.1937	0.2075	0.0188	0.2051	0.0794	0.0732	0.0834
chr7:86970275-86971055 (-) // 75.13 // q21.12	ATP-binding cassette, sub-family B (MDR/TAP), member 1	ABCB1	243951_at	0.2082	0.1858	0.1675	0.2989	0.2023	0.1447	-0.0059	0.2331	0.3248	0.288	0.3172	0.304	0.1681	0.1411	0.0935	0.1477	0.201188	0.3192	0.2955	0.3142	0.1735	0.1784	0.1808	0.3551	0.1491	0.3525	-0.0366	-0.034	-0.0307
chr8:17478985-17544903 (+) // 99.87 // p22	platelet-derived growth factor receptor-like	PDGFRL	205226_at	0.2172	0.2395	0.1937	0.2054	0.1343	0.0899	-0.0485	0.349	0.2906	0.3306	0.2521	0.3199	0.2083	0.0059	0.0245	0.4064	0.201175	0.128	0.2012	0.3361	0.2541	0.2562	0.255	0.1123	-0.0073	0.1044	0.0529	0.0503	0.0788
chr9:118227327-119016794 (-) // 99.24 // q33.1	astrotactin 2	ASTN2	209693_at	0.3261	0.2769	0.1891	0.2739	0.2297	0.1954	-0.0526	0.2489	0.2707	0.286	0.297	0.2763	0.1701	0.0201	0.0181	0.1925	0.201137	0.2454	0.2716	0.2876	0.231	0.2378	0.2375	0.2872	0.0503	0.2907	-0.0529	-0.0548	-0.0559
chr5:122709996-122786933 (-) // 96.22 // q23.2	coiled-coil domain containing 100	CCDC100	1554606_at	0.2621	0.2265	0.232	0.2655	0.253	0.2546	0.045	0.2331	0.2215	0.2532	0.2902	0.2206	0.1929	0.0257	0.037	0.2038	0.201044	0.1339	0.3154	0.3462	0.4841	0.4784	0.4772	0.2874	0.0787	0.2905	-0.0888	-0.0978	-0.1133
chr6:41674969-41676342 (+) // 87.92 // p21.1	forkhead box P4	FOXP4	227120_at	0.2176	0.2474	0.1796	0.288	0.1805	0.1618	0.0296	0.2317	0.291	0.2374	0.2617	0.255	0.1682	0.1674	0.1355	0.161	0.200837	0.2057	0.1744	0.2335	0.116	0.1192	0.1201	0.1769	0.0288	0.1902	0.1218	0.1153	0.1135
chr10:116180861-116276575 (-) // 99.05 // q25.3	actin binding LIM protein 1	ABLIM1	200965_s_at	0.2087	0.2145	0.2287	0.3102	0.1926	0.0791	-0.1291	0.2432	0.2711	0.2752	0.2616	0.2687	0.1153	0.2218	0.2089	0.2358	0.200394	0.2674	0.2816	0.3724	0.2628	0.2666	0.2657	0.3052	0.3311	0.3336	0.005	0.0026	-0.0044
chr1:216682381-216683960 (+) // 99.37 // q41	CDNA FLJ11812 fis, clone HEMBA1006364	---	228121_at	0.2077	0.2514	0.1808	0.3027	0.2392	0.2901	0.151	0.2096	0.2474	0.2216	0.2359	0.2268	0.1685	0.0788	0.0413	0.1517	0.200281	0.1737	0.1952	0.253	0.2061	0.2033	0.207	0.1497	0.0305	0.1549	-0.0138	-0.0079	-0.0213
chr2:217248968-217267786 (-) // 93.8 // q35	insulin-like growth factor binding protein 5	IGFBP5	203426_s_at	0.2419	0.2733	0.1774	0.2619	0.205	0.1774	0.2543	0.2413	0.2629	0.2371	0.2596	0.2357	0.1698	0.0169	0.0288	0.1568	0.200006	0.1445	0.2291	0.2913	0.307	0.3068	0.3078	0.209	0.0589	0.2338	-0.016	-0.0137	-0.0092
chr21:46355797-46377189 (+) // 98.76 // q22.3	collagen, type VI, alpha 2	COL6A2	209156_s_at	0.1655	0.1886	0.1224	0.1545	0.1532	0.2917	0.0035	0.3646	0.3155	0.3276	0.2732	0.3335	0.2013	0.0284	0.0454	0.2303	0.19995	0.1175	0.1218	0.2257	0.1132	0.117	0.1192	0.0758	-0.0265	0.0849	0.093	0.0846	0.0933
chr11:69165121-69178419 (+) // 97.77 // q13.2	cyclin D1	CCND1	208712_at	0.2136	0.2476	0.1519	0.2548	0.2235	0.3435	0.0887	0.1907	0.2227	0.217	0.2242	0.2165	0.1705	0.1283	0.0903	0.214	0.199862	0.0904	0.1107	0.2359	0.1229	0.1231	0.126	0.1609	0.002	0.1747	0.0589	0.0586	0.0562
chr19:15085921-15086785 (+) // 91.28 // p13.12	synapse defective 1, Rho GTPase, homolog 1 (C. elegans)	SYDE1	44702_at	0.1773	0.2062	0.1402	0.2111	0.2008	0.401	0.1442	0.2851	0.2727	0.2606	0.2304	0.2781	0.2179	-0.0353	-0.035	0.2384	0.199606	0.1038	0.0971	0.1673	0.0764	0.0808	0.0825	0.0702	-0.0709	0.0823	-0.0326	-0.0165	-0.0268
chr11:94538351-94540454 (-) // 97.66 // q21	CDNA FLJ33813 fis, clone CTONG2002744	---	225123_at	0.2338	0.2134	0.1903	0.2962	0.2033	0.1372	-0.0672	0.2721	0.3162	0.323	0.3264	0.3191	0.1443	0.0323	-0.0069	0.2531	0.199163	0.283	0.3249	0.4088	0.3096	0.313	0.3113	0.3414	0.3292	0.358	-0.088	-0.0852	-0.0885
chr19:2948832-2979927 (-) // 98.99 // p13.3	transducin-like enhancer of split 2 (E(sp1) homolog, Drosophila)	TLE2	204431_at	0.2371	0.2728	0.1934	0.2539	0.1709	0.1029	-0.0406	0.2545	0.2959	0.289	0.2784	0.2834	0.1448	0.0832	0.0757	0.2901	0.199088	0.1732	0.1931	0.2719	0.1522	0.154	0.1548	0.1858	0.0076	0.1769	0.0691	0.0609	0.0574
chr16:71374284-71377719 (-) // 92.73 // q22.3	zinc finger homeobox 3	ZFHX3	226137_at	0.3094	0.3253	0.1712	0.2592	0.1478	0.1087	0.0227	0.2462	0.2626	0.2715	0.2211	0.2712	0.1111	0.0797	0.0327	0.3447	0.199069	0.1834	0.2285	0.3162	0.2112	0.2118	0.2124	0.199	0.1437	0.1979	0.0221	0.0181	0.0615
chr7:86374989-86392908 (-) // 98.15 // q21.12	KIAA1324-like	KIAA1324L	244317_at	0.2091	0.1997	0.2203	0.279	0.2815	0.1836	0.0361	0.2478	0.2432	0.2462	0.2865	0.2179	0.2092	0.0243	0.0593	0.2396	0.198956	0.1535	0.2653	0.3606	0.4164	0.4189	0.4123	0.2566	0.0555	0.2814	-0.0739	-0.0641	-0.1029
chr16:48074-62593 (-) // 97.87 // p13.3	rhomboid 5 homolog 1 (Drosophila)	RHBDF1	218686_s_at	0.1801	0.1842	0.1839	0.2165	0.1777	0.2515	0.0251	0.2416	0.2183	0.2176	0.1874	0.2244	0.171	0.2549	0.2708	0.1768	0.198862	0.1052	0.1071	0.18	0.097	0.1007	0.1027	0.0717	-0.0605	0.0886	0.219	0.2092	0.2247
chr1:166026053-166026682 (+) // 95.15 // q24.2	myelin protein zero-like 1	MPZL1	201875_s_at	0.1856	0.1988	0.174	0.2532	0.1585	0.2775	0.0252	0.2008	0.2047	0.2238	0.2172	0.2144	0.1572	0.2633	0.2295	0.1881	0.198237	0.0739	0.1124	0.202	0.1824	0.1819	0.1828	0.1073	-0.0362	0.1213	0.1595	0.1455	0.1501
chr3:95074646-95175395 (-) // 98.49 // q11.2 /// chr3:90333023-90389254 (-) // 88.97 // p11.1	protein S (alpha)	PROS1	207808_s_at	0.2427	0.2269	0.1657	0.2431	0.1734	0.1477	-0.0353	0.2742	0.2675	0.2912	0.2658	0.2841	0.1739	0.0992	0.0734	0.2709	0.197775	0.1978	0.3045	0.4154	0.3476	0.3483	0.3504	0.201	0.065	0.2119	-0.0221	-0.0238	-0.0021
chr6:112599528-112607397 (-) // 85.15 // q21	laminin, alpha 4	LAMA4	216081_at	0.22	0.2582	0.1696	0.1889	0.1815	0.091	-0.0641	0.3392	0.2994	0.3132	0.248	0.2971	0.2183	-0.0105	0.0138	0.4008	0.197775	0.1462	0.1664	0.3009	0.1508	0.1549	0.1561	0.1855	0.0095	0.1727	-0.047	-0.0447	-0.0558
chr10:13771573-13773811 (-) // 67.92 // p13	FERM domain containing 4A	FRMD4A	1560031_at	0.2092	0.2091	0.1962	0.287	0.1803	0.1406	-0.0988	0.3017	0.2977	0.3422	0.2721	0.3429	0.1779	-0.0057	-0.0051	0.3114	0.197419	0.2129	0.1882	0.3445	0.134	0.1365	0.1384	0.2203	0.0046	0.2079	-0.0225	-0.0224	-0.0075
chr2:210760892-210798370 (-) // 97.53 // q34	acyl-Coenzyme A dehydrogenase, long chain	ACADL	206068_s_at	0.2852	0.3068	0.2322	0.2538	0.2361	0.1239	-0.0226	0.245	0.2276	0.2572	0.2258	0.2381	0.1611	0.0076	0.0315	0.3425	0.196987	0.2188	0.2924	0.3692	0.2652	0.2666	0.2694	0.3496	0.0963	0.3621	-0.0453	-0.0489	-0.0381
chr3:133882142-133882697 (-) // 94.23 // q22.1	nephronophthisis 3 (adolescent)	NPHP3	235410_at	0.2088	0.2614	0.1869	0.1875	0.118	0.1681	-0.1606	0.3647	0.3207	0.3538	0.3031	0.3462	0.1711	-0.0208	-0.0282	0.3701	0.196925	0.13	0.1598	0.3122	0.1602	0.1617	0.1635	0.2206	0.0792	0.1952	-0.039	-0.0492	-0.0117
chr2:33213233-33478076 (+) // 98.18 // p22.3	latent transforming growth factor beta binding protein 1	LTBP1	202728_s_at	0.193	0.1744	0.2437	0.2063	0.2249	0.2985	0.0934	0.3194	0.2328	0.2643	0.1963	0.2564	0.2224	0.0372	0.0752	0.1045	0.196419	0.0828	0.1782	0.1964	0.2494	0.252	0.2515	0.1132	0.0065	0.088	-0.0196	-0.0187	-0.0111
chr4:504842-523317 (+) // 98.04 // p16.3	phosphatidylinositol glycan anchor biosynthesis, class G	PIGG	218652_s_at	0.2045	0.206	0.186	0.2339	0.126	0.2736	-0.1361	0.2107	0.2574	0.2694	0.2857	0.2661	0.1668	0.2345	0.1797	0.1774	0.19635	0.1772	0.1883	0.2503	0.1652	0.1654	0.168	0.2412	0.027	0.2336	0.1309	0.1136	0.1406
chr20:45723584-45725705 (-) // 100.0 // q13.12	sulfatase 2	SULF2	233555_s_at	0.2095	0.16	0.1886	0.2455	0.2527	0.1627	0.0311	0.2746	0.2613	0.2799	0.2543	0.2629	0.1884	0.1	0.0975	0.17	0.196188	0.1619	0.2588	0.2945	0.3458	0.345	0.3462	0.2349	0.0495	0.249	0.0404	0.0344	0.0348
chr19:51532223-51534303 (+) // 16.21 // q13.32	Hypoxia inducible factor 3, alpha subunit	HIF3A	232669_at	0.2314	0.1966	0.2333	0.242	0.3244	0.1255	0.271	0.2154	0.2105	0.1859	0.1909	0.1887	0.23	0.0387	0.0814	0.1721	0.196112	0.1288	0.1599	0.1845	0.1262	0.1283	0.1297	0.2932	0.1435	0.2768	-0.0404	-0.0202	-0.0252
chr6:151720557-151721364 (+) // 83.78 // q25.1	A kinase (PRKA) anchor protein (gravin) 12	AKAP12	227530_at	0.1657	0.1891	0.1828	0.2656	0.2399	0.2685	0.0487	0.3129	0.2843	0.2902	0.2622	0.2838	0.1866	-0.0471	-0.0495	0.253	0.196044	0.129	0.1644	0.278	0.1708	0.1719	0.1754	0.1943	0.0233	0.202	-0.1507	-0.1453	-0.1615
chr5:16526159-16562031 (-) // 97.37 // p15.1	family with sequence similarity 134, member B	FAM134B	218510_x_at	0.2838	0.272	0.2149	0.2392	0.2924	0.114	-0.0379	0.2151	0.2054	0.2253	0.211	0.205	0.134	0.1461	0.1644	0.2505	0.19595	0.1495	0.205	0.2755	0.2243	0.2233	0.2241	0.3441	0.1143	0.3502	-0.0077	-0.0092	0.0062
chr21:33943091-33944160 (+) // 68.14 // q22.11	Chromosome 21q22.1 anonymous mRNA sequence	---	216472_at	0.1826	0.1714	0.1211	0.2188	0.1191	0.0763	0.0444	0.4099	0.3191	0.3784	0.2523	0.382	0.2401	-0.0173	-0.0048	0.2393	0.195794	0.2216	0.198	0.3129	0.1465	0.1525	0.1545	0.2364	0.0868	0.221	0.0135	0.032	0.0486
chr8:27547495-27586456 (+) // 91.42 // p21.1	scavenger receptor class A, member 3	SCARA3	219416_at	0.1645	0.1585	0.1309	0.2273	0.2559	0.2456	0.0413	0.295	0.2841	0.281	0.2821	0.2883	0.2526	0.0267	0.0308	0.168	0.195788	0.0962	0.0868	0.1433	0.0796	0.0831	0.0846	0.0851	-0.023	0.0921	0.0492	0.0581	0.0437
chr8:119067627-119069146 (-) // 79.43 // q24.11	Homo sapiens, clone IMAGE:4289218, mRNA	---	1562863_at	0.2283	0.1761	0.1927	0.2233	0.1651	0.1169	0.0021	0.3231	0.2334	0.3278	0.2044	0.3182	0.1624	0.1392	0.1312	0.1864	0.195662	0.2175	0.2941	0.3361	0.258	0.2524	0.2542	0.2149	0.0247	0.1778	0.0164	0.017	0.047
chr3:45042773-45052566 (+) // 92.22 // p21.31	C-type lectin domain family 3, member B	CLEC3B	205200_at	0.2771	0.3424	0.2372	0.2454	0.2303	0.0887	-0.0566	0.227	0.2145	0.2338	0.1938	0.2141	0.1071	0.032	0.0751	0.4612	0.195194	0.2277	0.2711	0.4292	0.2845	0.2865	0.2884	0.195	0.0387	0.1818	-0.0686	-0.0696	-0.0698
chr5:156125156-156125623 (+) // 53.09 // q33.3	sarcoglycan, delta (35kDa dystrophin-associated glycoprotein)	SGCD	230730_at	0.3238	0.3841	0.1406	0.148	0.148	0.2201	0.0032	0.2821	0.2761	0.2766	0.2704	0.2728	0.1792	0.0012	0.0053	0.19	0.195094	0.1074	0.1392	0.1997	0.1464	0.1491	0.1485	0.1309	0.022	0.1377	-0.0283	-0.0214	-0.0272
chr15:94738804-94739247 (+) // 96.93 // q26.2	Transcribed locus	---	236396_at	0.1638	0.175	0.153	0.2357	0.1346	0.1366	-0.0354	0.3214	0.3482	0.3174	0.3163	0.3338	0.2488	0.0526	0.042	0.1717	0.194719	0.1718	0.182	0.2619	0.1672	0.1707	0.1715	0.1589	0.0118	0.1408	0.0707	0.0693	0.095
chr9:138991842-138996014 (+) // 95.74 // q34.3	prostaglandin D2 synthase 21kDa (brain)	PTGDS	211748_x_at	0.17	0.1416	0.229	0.2752	0.2496	0.152	-0.0552	0.3118	0.2847	0.3034	0.2871	0.2982	0.1595	0.0168	0.0487	0.2398	0.194513	0.1813	0.208	0.2996	0.2051	0.2069	0.2086	0.2985	0.0536	0.2847	-0.0687	-0.0582	-0.0749
chr14:85157473-85164016 (+) // 86.16 // q31.3	fibronectin leucine rich transmembrane protein 2	FLRT2	204359_at	0.1597	0.1672	0.1619	0.2176	0.1783	0.2101	0.005	0.3591	0.2987	0.3298	0.2687	0.3341	0.235	-0.017	-0.0207	0.2246	0.194506	0.1314	0.2073	0.2909	0.2484	0.2485	0.2488	0.1419	0.0037	0.1347	-0.0942	-0.0912	-0.0923
chr11:62039949-62050658 (-) // 94.83 // q12.3	AHNAK nucleoprotein	AHNAK	211986_at	0.176	0.2448	0.1436	0.1823	0.1217	0.0855	-0.0968	0.3324	0.3161	0.2956	0.251	0.2977	0.1723	0.1184	0.1358	0.3348	0.19445	0.1702	0.1686	0.3326	0.1498	0.1582	0.1589	0.1514	0.1312	0.1754	0.0736	0.0722	0.087
chr3:150717711-150903750 (-) // 90.01 // q25.1	WW domain containing transcription regulator 1	WWTR1	202133_at	0.1593	0.1974	0.1342	0.2218	0.1596	0.2248	-0.0004	0.3093	0.2876	0.3015	0.2741	0.3099	0.259	0.0458	-0.0031	0.2299	0.194419	0.0766	0.102	0.2077	0.1123	0.1148	0.1173	0.0923	-0.0244	0.1103	0.0014	0.0002	0.0169
chr10:24958929-25051140 (-) // 86.61 // p12.1 /// chr6:80836036-80836944 (-) // 87.37 // q14.1	Rho GTPase activating protein 21	ARHGAP21	241701_at	0.2744	0.2107	0.3125	0.2772	0.3164	0.1514	0.0458	0.2515	0.2089	0.2105	0.2068	0.193	0.2256	-0.0067	0.0386	0.1929	0.194344	0.1736	0.2941	0.3003	0.3422	0.345	0.3429	0.3271	0.095	0.3004	-0.0993	-0.0932	-0.0957
chr1:142235513-142235966 (+) // 93.72 // q12 /// chr1:141783830-141784283 (+) // 93.72 // q12 /// chr4:49249278-49249735 (+) // 90.38 // p11 /// chr1:142035412-142035865 (-) // 93.93 // q12 /// chr1:141638943-141639396 (-) // 93.31 // q12 /// chr21_random:1460051-1460504 (-) // 93.51 // /// chr21_random:642987-643440 (-) // 93.51 // /// chr4:48939250-49183870 (-) // 93.1 // p11	similar to ankyrin repeat domain 20 family, member A1	LOC727770	237737_at	0.2581	0.2403	0.2248	0.2131	0.2561	0.1898	0.037	0.2108	0.1897	0.2285	0.1929	0.2159	0.2165	0.04	0.0679	0.3238	0.194075	0.0621	0.1261	0.2052	0.1884	0.1854	0.1865	0.2098	0.0481	0.192	-0.033	-0.0314	-0.0313
chr4:38546418-38621980 (+) // 98.67 // p14	family with sequence similarity 114, member A1	FAM114A1	226697_at	0.1769	0.2027	0.2203	0.1802	0.2328	0.3252	0.1331	0.2874	0.1946	0.196	0.1733	0.1994	0.2404	0.07	0.1184	0.1526	0.193956	0.027	0.0983	0.1728	0.1754	0.1748	0.1773	0.0688	-0.0226	0.0571	0.003	-0.0014	-0.0039
chr20:45097459-45097888 (+) // 54.31 // q13.12	Transcribed locus	---	243652_at	0.2619	0.2077	0.2228	0.255	0.2804	0.1057	0.2313	0.2276	0.1974	0.1911	0.1499	0.1928	0.2477	0.0827	0.1195	0.128	0.193844	0.1808	0.2238	0.2193	0.2037	0.2006	0.2006	0.2904	0.0977	0.2549	0.0909	0.0965	0.1223
chr5:237414-238017 (+) // 15.16 // p15.33	pleckstrin homology domain containing, family G (with RhoGef domain) member 4B	PLEKHG4B	236255_at	0.2313	0.2011	0.1751	0.2796	0.2415	0.1742	0.1056	0.2308	0.2155	0.2507	0.2207	0.255	0.1602	0.0995	0.0743	0.1852	0.193769	0.0921	0.102	0.1889	0.0879	0.0904	0.0911	0.2767	0.0696	0.2732	0.1009	0.1038	0.1396
chr5:122708484-122709919 (-) // 94.58 // q23.2	coiled-coil domain containing 100	CCDC100	226449_at	0.2204	0.2486	0.2011	0.2841	0.1803	0.1963	-0.0761	0.2487	0.3106	0.2952	0.3255	0.2967	0.1473	0.0017	-0.0639	0.2826	0.193694	0.2369	0.2775	0.4027	0.2841	0.2843	0.2826	0.4191	0.3694	0.3832	-0.1357	-0.143	-0.1383
chr1:223747157-223769097 (-) // 96.96 // q42.12	enabled homolog (Drosophila)	ENAH	222433_at	0.2651	0.31	0.1466	0.2724	0.1272	0.3262	0.0421	0.2091	0.1979	0.225	0.2236	0.2254	0.1603	0.0941	0.0545	0.2149	0.1934	0.0516	0.0812	0.1669	0.1342	0.1319	0.1356	0.0727	-0.0489	0.0904	0.1573	0.1494	0.173
chr21:16089375-16094716 (+) // 48.69 // q21.1	ubiquitin specific peptidase 25	USP25	1563497_at	0.2294	0.1824	0.2246	0.2589	0.2559	0.0989	-0.1004	0.2889	0.2691	0.3063	0.2491	0.2975	0.2313	0.031	0.0413	0.2294	0.19335	0.2481	0.2815	0.3368	0.2655	0.2617	0.2619	0.4022	0.2077	0.3667	-0.0132	-0.0194	0.0065
chr1:47998788-47999283 (-) // 98.61 // p33	hypothetical protein LOC284542	LOC284542	230920_at	0.1883	0.1879	0.197	0.3303	0.228	0.1387	0.0022	0.2668	0.2917	0.2852	0.2543	0.2906	0.178	0.0355	0.0233	0.195	0.1933	0.2592	0.2615	0.3502	0.2419	0.242	0.2425	0.1886	0.0429	0.1825	-0.0005	-0.0002	0.0042
chr3:195336627-195339090 (+) // 96.26 // q29	hairy and enhancer of split 1, (Drosophila)	HES1	203395_s_at	0.2197	0.2123	0.2319	0.2746	0.1737	0.143	0.0105	0.1688	0.1543	0.1632	0.1616	0.1594	0.1118	0.4051	0.3811	0.1195	0.193156	0.1109	0.1572	0.2168	0.1736	0.1731	0.1757	0.1585	0.0088	0.1804	0.1793	0.1677	0.2099
chr14:53486409-53488674 (-) // 90.14 // q22.2	bone morphogenetic protein 4	BMP4	211518_s_at	0.241	0.2129	0.2396	0.2367	0.3245	0.1846	0.055	0.2049	0.1845	0.1877	0.1882	0.1669	0.1959	0.1308	0.1689	0.1661	0.193013	0.1296	0.2449	0.2566	0.2995	0.2977	0.2981	0.2374	0.0558	0.2425	-0.029	-0.0301	-0.0386
chr21:34125595-34128045 (+) // 74.95 // q22.11	---	---	216628_at	0.2216	0.226	0.1328	0.2102	0.1222	0.0962	-0.028	0.3414	0.2981	0.3599	0.2607	0.3496	0.1748	-0.0173	-0.0125	0.3503	0.192875	0.1943	0.2094	0.3552	0.175	0.1751	0.1771	0.227	0.0802	0.2263	-0.0269	-0.0252	-0.0146
chr1:202490206-202490930 (-) // 60.84 // q32.1	Transcribed locus	---	231327_at	0.2866	0.2337	0.2199	0.2646	0.294	0.1074	0.2781	0.1751	0.213	0.1865	0.1595	0.1819	0.2324	0.0748	0.0781	0.0976	0.1927	0.1781	0.3075	0.2734	0.2879	0.2868	0.2875	0.293	0.1363	0.2381	0.0003	0.0088	0.0295
chr3:180221923-180223446 (-) // 87.92 // q26.32	CDNA clone IMAGE:5261213	---	228315_at	0.2162	0.1762	0.2392	0.267	0.3199	0.2224	0.0014	0.2621	0.2671	0.2477	0.2478	0.2566	0.2627	-0.0619	-0.0231	0.1799	0.192575	0.1792	0.2604	0.306	0.3159	0.3144	0.315	0.3298	0.1113	0.2773	-0.1408	-0.1428	-0.1671
chr15:94675996-94682008 (+) // 91.67 // q26.2	nuclear receptor subfamily 2, group F, member 2	NR2F2	209121_x_at	0.1367	0.1265	0.1433	0.2028	0.162	0.175	0.0018	0.4118	0.3079	0.322	0.2643	0.334	0.2557	0.0338	0.068	0.135	0.192538	0.1112	0.1134	0.1912	0.1153	0.1216	0.1232	0.0664	-0.0413	0.0767	0.1381	0.1382	0.1497
chr2:55946605-56004421 (-) // 97.28 // p16.1	EGF-containing fibulin-like extracellular matrix protein 1	EFEMP1	201842_s_at	0.1784	0.2054	0.1551	0.2306	0.2745	0.1901	0.0518	0.2638	0.2481	0.241	0.2317	0.2383	0.244	0.0335	0.0295	0.259	0.192175	0.1147	0.1566	0.2718	0.1888	0.1895	0.192	0.1375	0.0108	0.1482	-0.0446	-0.0419	-0.0523
chr6:26195524-26203424 (+) // 82.97 // p22.1	hemochromatosis	HFE	211330_s_at	0.206	0.2286	0.1978	0.2085	0.1659	0.2324	0.0431	0.2415	0.1977	0.2341	0.2268	0.2173	0.1967	0.1181	0.121	0.2332	0.191794	0.148	0.1939	0.2848	0.2276	0.2297	0.2334	0.2094	0.0457	0.215	0.0186	0.028	0.0098
chr6:57162555-57194164 (-) // 99.93 // p12.1	RAB23, member RAS oncogene family	RAB23	220955_x_at	0.1808	0.1851	0.1382	0.183	0.1862	0.366	0.1088	0.2867	0.237	0.2746	0.2704	0.2648	0.2148	0.0139	0.0167	0.1412	0.191763	0.0526	0.1246	0.1751	0.2246	0.2202	0.2245	0.0774	-0.0175	0.0877	-0.0356	-0.037	-0.0508
chr2:217206377-217237401 (+) // 90.93 // q35	insulin-like growth factor binding protein 2, 36kDa	IGFBP2	202718_at	0.2629	0.2355	0.1437	0.2529	0.1946	0.1839	-0.0053	0.2232	0.2238	0.2298	0.2228	0.2302	0.1497	0.13	0.1544	0.2348	0.191681	0.1611	0.2093	0.261	0.2342	0.236	0.2371	0.1682	0.0139	0.171	0.166	0.1499	0.1311
chr10:34561973-34564130 (-) // 40.86 // p11.21	CDNA FLJ12203 fis, clone MAMMA1000914	---	233265_at	0.1853	0.1609	0.1787	0.2366	0.1472	0.023	-0.0257	0.3008	0.2718	0.3179	0.2261	0.3371	0.1394	0.2096	0.2056	0.1524	0.191669	0.2076	0.188	0.2731	0.0959	0.1001	0.1011	0.2008	-0.0136	0.1875	0.1439	0.1442	0.2332
chr1:103114616-103115602 (-) // 97.91 // p21.1	collagen, type XI, alpha 1	COL11A1	229271_x_at	0.2119	0.2234	0.2284	0.2824	0.2037	0.2273	0.0594	0.2152	0.225	0.2464	0.2367	0.2338	0.1406	0.0729	0.052	0.2043	0.191463	0.1392	0.1784	0.2585	0.2187	0.2167	0.2172	0.1759	0.0469	0.1769	-0.0132	-0.0133	-0.0071
chr4:996255-1010663 (+) // 70.68 // p16.3	fibroblast growth factor receptor-like 1	FGFRL1	223321_s_at	0.2336	0.2359	0.17	0.2659	0.2516	0.2626	0.0823	0.2077	0.2302	0.2229	0.2314	0.2255	0.1763	0.0388	0.029	0.1911	0.190925	0.204	0.2175	0.2601	0.2027	0.2052	0.2065	0.1495	0.0045	0.155	0.0171	0.0261	0.0023
chr13:48781944-48855029 (-) // 99.9 // q14.2	calcium binding protein 39-like	CAB39L	221003_s_at	0.2858	0.2428	0.2787	0.2533	0.3091	0.1433	0.0668	0.2084	0.1755	0.2122	0.1996	0.1808	0.1691	0.0494	0.0922	0.1852	0.190762	0.1057	0.2839	0.3055	0.407	0.4031	0.4052	0.2403	0.0506	0.2231	-0.0615	-0.0618	-0.0703
chr9:94297419-94338073 (-) // 92.9 // q22.31	extracellular matrix protein 2, female organ and adipocyte specific	ECM2	206101_at	0.2332	0.3314	0.1572	0.1807	0.1288	0.0789	-0.0938	0.2916	0.2871	0.3111	0.2474	0.2908	0.1191	-0.0074	-0.0044	0.4986	0.190644	0.1662	0.2234	0.4175	0.2222	0.2272	0.2273	0.1889	0.026	0.1827	-0.0414	-0.0464	-0.0361
chr17:19492835-19520396 (+) // 94.24 // p11.2	aldehyde dehydrogenase 3 family, member A2	ALDH3A2	210544_s_at	0.2564	0.2362	0.1655	0.2288	0.2313	0.1289	0.0204	0.1935	0.1753	0.2041	0.2032	0.1804	0.1505	0.1934	0.2504	0.2303	0.190538	0.1411	0.2511	0.3071	0.2849	0.2872	0.2906	0.1951	0.0056	0.2171	0.0595	0.0538	0.0197
chr1:160219605-160242768 (-) // 95.0 // q23.3	olfactomedin-like 2B	OLFML2B	213125_at	0.1695	0.1598	0.1203	0.1907	0.1552	0.1491	-0.0251	0.321	0.2965	0.3481	0.2685	0.3451	0.2038	0.0383	0.0374	0.2687	0.190431	0.1033	0.1164	0.2219	0.1444	0.1481	0.149	0.1549	0.0189	0.157	0.0899	0.0844	0.0983
chr3:148593911-148594994 (+) // 90.52 // q24	Hypothetical gene supported by AK054937	FLJ30375	1557154_at	0.2083	0.1984	0.2178	0.2556	0.3039	0.2461	0.0713	0.2261	0.2372	0.2036	0.2354	0.1991	0.2179	-0.0092	0.0276	0.2074	0.190406	0.186	0.2046	0.2325	0.1992	0.206	0.2054	0.2382	0.0122	0.2433	-0.0563	-0.0302	-0.0795
chr8:70576662-70735701 (+) // 98.84 // q13.2	sulfatase 1	SULF1	212354_at	0.1807	0.1744	0.113	0.1868	0.2044	0.2209	0.0395	0.2816	0.2994	0.2946	0.2566	0.3035	0.21	0.0908	0.0659	0.1224	0.190281	0.137	0.177	0.2324	0.2038	0.2065	0.2067	0.124	0.0063	0.1304	0.1414	0.1303	0.1709
chr11:121710359-121710755 (+) // 97.51 // q24.1	---	---	243466_at	0.1929	0.1786	0.2236	0.2713	0.2487	0.1246	0.0711	0.227	0.2134	0.2303	0.2089	0.2288	0.2384	0.0917	0.1038	0.1908	0.190244	0.1623	0.222	0.2592	0.2334	0.2295	0.2332	0.1855	0.0483	0.1831	0.0229	0.0401	0.032
chr20:45052054-45250897 (+) // 98.41 // q13.12	eyes absent homolog 2 (Drosophila)	EYA2	209692_at	0.2637	0.2439	0.1951	0.2777	0.1989	0.1435	-0.0226	0.1952	0.2048	0.2252	0.2093	0.2226	0.1312	0.2164	0.2037	0.1328	0.190088	0.1899	0.217	0.2397	0.1907	0.1943	0.1954	0.2199	0.0427	0.2297	0.2893	0.2739	0.3173
chr6:94007190-94008327 (-) // 99.74 // q16.1	EPH receptor A7	EPHA7	238533_at	0.2251	0.214	0.2394	0.2835	0.3103	0.1884	0.0607	0.1703	0.1705	0.1869	0.2063	0.171	0.1376	0.0364	0.0598	0.3789	0.189944	0.0651	0.1077	0.2242	0.2125	0.2081	0.214	0.2094	0.058	0.1944	-0.0378	-0.0365	-0.0388
chr13:76462795-76474652 (+) // 86.32 // q22.3	ceroid-lipofuscinosis, neuronal 5	CLN5	204085_s_at	0.2316	0.2725	0.1949	0.22	0.1778	0.2352	-0.015	0.1972	0.2161	0.2499	0.2313	0.2251	0.0919	0.1376	0.0891	0.2834	0.189912	0.0925	0.1764	0.3072	0.2446	0.2408	0.2444	0.1732	0.0729	0.1807	-0.006	-0.0232	-0.0201
chr19:52598199-52609876 (-) // 46.23 // q13.32	Meis homeobox 3 pseudogene 1	MEIS3P1	214077_x_at	0.2429	0.2696	0.1846	0.2391	0.1427	0.1581	-0.0254	0.2471	0.263	0.2715	0.2407	0.2712	0.1155	0.1135	0.092	0.2108	0.189806	0.1069	0.1555	0.27	0.194	0.1945	0.1971	0.1281	0.0402	0.1507	0.2036	0.1821	0.2296
chr8:22465406-22488957 (+) // 97.69 // p21.3	sorbin and SH3 domain containing 3	SORBS3	209253_at	0.2074	0.2161	0.1485	0.221	0.2687	0.2199	0.0608	0.2576	0.2522	0.2242	0.2047	0.2346	0.1945	0.0336	0.0689	0.2188	0.189469	0.1893	0.1716	0.2453	0.1408	0.148	0.1491	0.1199	-0.0702	0.1087	0.0242	0.0295	-0.0063
chr10:17310935-17319597 (+) // 94.16 // p12.33	vimentin	VIM	201426_s_at	0.1743	0.1953	0.1415	0.1963	0.2425	0.3282	0.011	0.3161	0.2863	0.2885	0.2734	0.2903	0.27	-0.1579	-0.1461	0.321	0.189419	0.1119	0.1254	0.2424	0.1584	0.162	0.165	0.1251	-0.0337	0.1302	-0.0936	-0.0901	-0.1066
chr16:73043356-73095146 (-) // 98.81 // q22.3	golgi apparatus protein 1	GLG1	214730_s_at	0.1983	0.1186	0.2147	0.2144	0.2677	0.2177	0.0195	0.3049	0.2145	0.2567	0.2361	0.2497	0.2376	0.0301	0.1034	0.1463	0.189388	0.0765	0.1783	0.2134	0.2455	0.2456	0.2475	0.3118	0.0174	0.244	-0.049	-0.0626	-0.0733
chr5:149473623-149515503 (-) // 93.79 // q33.1	platelet-derived growth factor receptor, beta polypeptide	PDGFRB	202273_at	0.1467	0.1676	0.1143	0.1673	0.1336	0.1566	-0.0016	0.3853	0.3235	0.3376	0.2567	0.3446	0.1866	0.0065	0.0227	0.28	0.18925	0.1272	0.1342	0.2806	0.1391	0.1464	0.1483	0.0951	-0.0178	0.1037	0.0875	0.0878	0.1053
chr7:134304538-134306010 (+) // 96.14 // q33	caldesmon 1	CALD1	212077_at	0.1229	0.1551	0.102	0.1419	0.1108	0.254	-0.0034	0.3633	0.3033	0.3453	0.2749	0.3492	0.2071	0.0542	0.0119	0.2349	0.189213	0.0716	0.1147	0.238	0.1306	0.1327	0.136	0.0391	-0.0636	0.0536	0.0407	0.0372	0.0786
chr11:129444995-129519910 (+) // 93.79 // q24.3	amyloid beta (A4) precursor-like protein 2	APLP2	208703_s_at	0.1933	0.1926	0.1786	0.2587	0.2733	0.2261	-0.0764	0.2366	0.2465	0.2054	0.2485	0.2015	0.2061	0.1089	0.1171	0.2103	0.189194	0.1815	0.1989	0.2799	0.2373	0.2422	0.2456	0.2029	0.0471	0.2286	0.0418	0.0357	-0.037
chr7:113842287-113853971 (+) // 38.24 // q31.1	forkhead box P2	FOXP2	1555516_at	0.1341	0.1368	0.1088	0.1811	0.094	0.1205	-0.012	0.2783	0.3341	0.2758	0.3453	0.2844	0.3449	0.1466	0.1442	0.1099	0.189175	0.0814	0.0827	0.0857	0.0549	0.0561	0.0572	0.0841	0.0103	0.0939	0.014	0.0252	0.0155
chr5:140532426-140535247 (+) // 99.44 // q31.3	protocadherin beta 7	PCDHB7	231738_at	0.2231	0.1952	0.2032	0.2387	0.2039	0.2224	0.0374	0.2264	0.2242	0.2654	0.2287	0.246	0.1662	0.0504	0.0455	0.2501	0.189175	0.0692	0.1164	0.2049	0.1616	0.16	0.1623	0.208	0.0457	0.1927	-0.0216	-0.0216	-0.0105
chr15:48781754-48783008 (-) // 70.01 // q21.2	Transcribed locus	---	227682_at	0.2881	0.3802	0.1512	0.1839	0.1215	0.159	-0.0607	0.1706	0.2033	0.2158	0.2148	0.1955	0.0968	0.2757	0.1667	0.2587	0.188819	0.1526	0.2016	0.2893	0.2112	0.2125	0.2135	0.2021	0.0394	0.2092	0.0025	-0.0099	0.0191
chr22:22410865-22413522 (-) // 82.14 // q11.23	Full length insert cDNA clone YZ84G08 /// Zinc finger protein 70	ZNF70	243816_at	0.221	0.2653	0.1847	0.2157	0.1228	0.3133	0.0169	0.2452	0.2612	0.2782	0.2661	0.277	0.1869	-0.019	-0.0422	0.2278	0.188806	0.068	0.0899	0.1687	0.1084	0.1069	0.1095	0.1592	-0.009	0.1289	-0.0485	-0.0602	-0.0272
chr4:83958838-84031313 (-) // 99.93 // q21.22	SEC31 homolog A (S. cerevisiae)	SEC31A	200945_s_at	0.177	0.2088	0.1246	0.1775	0.1818	0.2511	-0.0147	0.2948	0.2822	0.2991	0.2624	0.2983	0.1447	0.0698	0.0267	0.2338	0.188619	0.08	0.1275	0.2702	0.1781	0.1761	0.1792	0.0739	-0.0513	0.0818	0.0985	0.078	0.1085
chr12:55808548-55893390 (+) // 99.9 // q13.3	low density lipoprotein-related protein 1 (alpha-2-macroglobulin receptor) /// similar to low density lipoprotein-related protein 1 (alpha-2-macroglobulin receptor)	LOC100134190 /// LRP1	200785_s_at	0.1658	0.2177	0.1625	0.1736	0.1574	0.1083	-0.0645	0.3857	0.3346	0.3063	0.266	0.3021	0.1978	-0.0441	-0.0013	0.3491	0.188562	0.1962	0.1861	0.3196	0.1659	0.1755	0.1755	0.1201	0.0106	0.1356	-0.0372	-0.0294	-0.0533
chr11:12918392-12922853 (+) // 86.54 // p15.2	TEA domain family member 1 (SV40 transcriptional enhancer factor)	TEAD1	224955_at	0.2219	0.3121	0.0796	0.1565	0.0673	0.3022	0.0266	0.2789	0.2313	0.2547	0.2078	0.2566	0.1735	0.099	0.0764	0.27	0.1884	0.0712	0.0912	0.2133	0.0967	0.0979	0.1003	0.0193	-0.0781	0.0373	0.0134	0.0159	0.033
chr12:64006944-64143728 (+) // 99.35 // q14.3	methionine sulfoxide reductase B3	MSRB3	238583_at	0.2388	0.3155	0.1264	0.1496	0.1952	0.2285	0.0786	0.3247	0.268	0.2209	0.2213	0.2244	0.2737	-0.0903	-0.0346	0.2737	0.1884	0.1086	0.1291	0.1799	0.1458	0.1511	0.1521	0.0705	-0.0074	0.0908	-0.1166	-0.0912	-0.1427
chr20:60918861-60942954 (+) // 97.9 // q13.33	collagen, type IX, alpha 3	COL9A3	204724_s_at	0.1843	0.1754	0.2598	0.2776	0.2098	0.1802	0.0241	0.215	0.2217	0.235	0.235	0.226	0.1661	0.1031	0.0971	0.2009	0.188194	0.0962	0.1106	0.1562	0.0922	0.0937	0.0949	0.2025	0.0492	0.1997	-0.0514	-0.0474	-0.0539
chr1:36333426-36337703 (-) // 99.07 // p34.3	collagen, type VIII, alpha 2	COL8A2	221900_at	0.2102	0.2066	0.1708	0.2438	0.1694	0.2174	-0.0133	0.2716	0.2958	0.2988	0.2474	0.3033	0.1793	0.0268	0.0127	0.1642	0.1878	0.2185	0.2485	0.3058	0.2788	0.2768	0.2773	0.143	0.0159	0.1333	0.0984	0.0952	0.1035
chr7:80209790-80386603 (-) // 96.87 // q21.11	sema domain, immunoglobulin domain (Ig), short basic domain, secreted, (semaphorin) 3C	SEMA3C	203789_s_at	0.2205	0.3042	0.1174	0.1716	0.0854	0.2245	-0.0012	0.2226	0.237	0.2477	0.2204	0.2351	0.1085	0.1758	0.1277	0.3062	0.187713	0.1145	0.1448	0.2758	0.1573	0.1591	0.1606	0.1025	-0.0214	0.1184	0.0969	0.0807	0.1049
chr3:172801313-172803011 (-) // 79.74 // q26.31	phospholipase D1, phosphatidylcholine-specific	PLD1	226636_at	0.1739	0.156	0.194	0.2315	0.2183	0.0976	-0.0386	0.2068	0.2077	0.2342	0.212	0.2198	0.1376	0.3115	0.2729	0.1647	0.187494	0.1684	0.2556	0.3389	0.3072	0.3059	0.3061	0.2397	0.0563	0.2482	-0.0365	-0.0446	-0.02
chr7:106084448-106085991 (-) // 97.84 // q22.3	CDNA FLJ25556 fis, clone JTH02629	---	226756_at	0.1857	0.2169	0.1408	0.1973	0.1815	0.23	0.0059	0.2499	0.2916	0.2942	0.2761	0.2895	0.1356	0.0655	0.0172	0.2219	0.187475	0.1773	0.2358	0.3572	0.2833	0.286	0.2849	0.1947	0.0719	0.2007	-0.0156	-0.0269	0.0034
chr11:111288708-111290027 (+) // 91.65 // q23.1	heat shock 27kDa protein 2	HSPB2	205824_at	0.3222	0.4535	0.1333	0.1799	0.177	0.1094	-0.0212	0.2303	0.2602	0.2372	0.231	0.23	0.1317	-0.0306	-0.0286	0.3823	0.18735	0.16	0.1836	0.3159	0.1711	0.1751	0.1747	0.149	0.0114	0.1525	-0.0839	-0.0759	-0.089
chr10:88674013-88674925 (+) // 95.81 // q23.2 /// chr11:120736291-120737211 (-) // 93.54 // q24.1	bone morphogenetic protein receptor, type IA	BMPR1A	213578_at	0.264	0.3454	0.1798	0.239	0.091	0.1995	0.0742	0.1806	0.1995	0.2019	0.2231	0.1936	0.0769	0.1365	0.0617	0.3296	0.187269	0.068	0.1184	0.2183	0.1406	0.1371	0.1382	0.1091	0.002	0.1174	0.003	-0.0047	0.0253
chr12:55273400-55275650 (+) // 84.44 // q13.3	CDNA FLJ39093 fis, clone NT2RP7020112	---	225776_at	0.1521	0.2383	0.1129	0.19	0.1431	0.2135	0.0068	0.2427	0.2576	0.2261	0.2173	0.227	0.1697	0.1819	0.1268	0.2881	0.187119	0.1045	0.109	0.2429	0.1175	0.1197	0.1218	0.077	0.0037	0.0928	0.0396	0.0305	0.0269
chr17:63929016-63929475 (-) // 95.03 // q24.2	WD repeat domain, phosphoinositide interacting 1	WIPI1	213836_s_at	0.2321	0.2873	0.1888	0.2049	0.1803	0.2298	0.0419	0.1718	0.2065	0.2159	0.2146	0.2109	0.1471	0.1483	0.0891	0.2233	0.187037	0.0781	0.101	0.229	0.1362	0.1343	0.1371	0.2048	0.0403	0.1968	0.0141	-0.0012	0.0286
chr1:206369714-206371430 (-) // 84.5 // q32.2	CDNA: FLJ21642 fis, clone COL08374	---	234636_at	0.239	0.1946	0.1661	0.2315	0.2625	0.0841	0.1419	0.2504	0.2245	0.2282	0.1914	0.2212	0.2263	0.0953	0.1124	0.1219	0.186956	0.3074	0.3192	0.2795	0.2877	0.29	0.2895	0.2131	0.0884	0.2324	-0.0015	0.0194	-0.0007
chr5:38513110-38515197 (-) // 98.04 // p13.1	leukemia inhibitory factor receptor alpha	LIFR	227771_at	0.2417	0.252	0.2649	0.2661	0.1945	0.1824	-0.0227	0.2355	0.2072	0.234	0.2343	0.2123	0.1925	0.0058	0.0232	0.2658	0.186844	0.1048	0.1799	0.2839	0.2508	0.2508	0.2538	0.2147	0.0256	0.2302	-0.0626	-0.0574	-0.064
chr8:119003405-119003864 (-) // 94.77 // q24.11	---	---	239227_at	0.1806	0.148	0.1078	0.2372	0.1392	0.0882	-0.0668	0.302	0.2675	0.3387	0.224	0.3533	0.1466	0.192	0.1762	0.1537	0.186763	0.2528	0.2698	0.3275	0.187	0.1865	0.1891	0.1959	0.1033	0.178	0.1138	0.1132	0.1704
chr11:101607702-101609359 (+) // 90.8 // q22.2	Yes-associated protein 1, 65kDa	YAP1	224895_at	0.1871	0.2453	0.1083	0.1772	0.0804	0.2383	0.0816	0.2328	0.2126	0.2084	0.1998	0.2012	0.1579	0.2251	0.2176	0.2091	0.186419	0.032	0.0697	0.1458	0.1039	0.1046	0.1078	0.0263	-0.0477	0.0509	0.1035	0.1	0.0892
chr1:101110531-101132956 (-) // 98.24 // p21.2	exostoses (multiple)-like 2	EXTL2	209537_at	0.2218	0.2282	0.1339	0.2519	0.2496	0.3408	0.0609	0.2597	0.2715	0.2532	0.286	0.2549	0.1961	-0.1357	-0.1381	0.2447	0.186213	0.1953	0.2248	0.2684	0.2372	0.2364	0.2375	0.1258	-0.0215	0.1407	-0.1745	-0.1688	-0.1975
chr21:16024384-16173101 (+) // 99.21 // q21.1	ubiquitin specific peptidase 25	USP25	220419_s_at	0.2523	0.2621	0.1943	0.2394	0.269	0.1381	0.0641	0.2068	0.2125	0.223	0.2329	0.2061	0.1967	0.0272	0.0354	0.215	0.185931	0.1499	0.2461	0.2926	0.3034	0.2997	0.2996	0.2858	0.2235	0.2892	-0.0949	-0.0907	-0.0968
chr6:94176093-94185993 (-) // 97.12 // q16.1	EPH receptor A7	EPHA7	1554629_at	0.2013	0.1902	0.2447	0.2545	0.2985	0.1968	0.0762	0.1825	0.1546	0.1756	0.1681	0.168	0.1867	0.0634	0.091	0.3224	0.185906	0.0225	0.0436	0.1395	0.1027	0.1021	0.105	0.2173	0.0676	0.1864	-0.0173	-0.0167	-0.0127
chr17:7288067-7288980 (+) // 94.61 // p13.1	fibroblast growth factor 11	FGF11	227271_at	0.2363	0.2231	0.1627	0.275	0.2193	0.1618	0.0559	0.1745	0.2012	0.1946	0.1826	0.2015	0.1014	0.1695	0.1922	0.2222	0.185863	0.2145	0.19	0.2284	0.1445	0.1473	0.1483	0.2078	0.01	0.2075	-0.0051	0.0058	-0.0386
chr13:93637325-93638781 (+) // 89.25 // q31.3	Clone IMAGE:123704, mRNA sequence	---	233670_at	0.2274	0.2048	0.219	0.2338	0.2678	0.1049	0.1878	0.2444	0.1861	0.2117	0.1617	0.2099	0.2606	0.0548	0.0862	0.1128	0.185856	0.1925	0.2515	0.2274	0.2316	0.2326	0.2329	0.1859	0.0277	0.1773	-0.0239	0.0064	0.0011
chr12:8689805-8690789 (-) // 69.72 // p13.31	microfibrillar associated protein 5	MFAP5	213764_s_at	0.2046	0.2637	0.1378	0.1448	0.1005	0.1436	-0.0385	0.3235	0.2845	0.3038	0.2413	0.2939	0.1532	0.0159	0.0201	0.3798	0.185781	0.1518	0.2143	0.362	0.2351	0.2384	0.2359	0.1185	0.0116	0.1118	-0.0304	-0.0308	-0.0234
chr11:69165118-69175408 (+) // 93.41 // q13.2	cyclin D1	CCND1	208711_s_at	0.2156	0.2045	0.2188	0.2403	0.2721	0.3206	0.0978	0.1814	0.1597	0.1645	0.1702	0.1647	0.2006	0.0781	0.1103	0.1723	0.185719	0.0603	0.0987	0.1771	0.1488	0.148	0.1504	0.2015	0.0304	0.1967	0.0364	0.0333	0.0285
chr6:131202182-131319333 (-) // 97.28 // q23.1	erythrocyte membrane protein band 4.1-like 2	EPB41L2	201719_s_at	0.1794	0.237	0.1745	0.2419	0.1377	0.1566	-0.0198	0.2546	0.2661	0.2759	0.2453	0.2751	0.1243	0.0643	0.0147	0.343	0.185662	0.1832	0.236	0.3651	0.2508	0.2483	0.2499	0.1862	0.0848	0.1873	-0.0692	-0.0771	-0.0546
chr7:76663427-76667080 (-) // 97.39 // q11.23	fibrinogen-like 2	FGL2	204834_at	0.2575	0.2068	0.2315	0.2752	0.282	0.1163	-0.002	0.2358	0.2405	0.2567	0.2443	0.2403	0.1814	0.0022	0.0101	0.1894	0.1855	0.2406	0.3413	0.3886	0.394	0.3957	0.3927	0.3604	0.1326	0.3331	-0.0846	-0.0838	-0.0942
chr21:33744392-33774103 (-) // 75.22 // q22.11	transmembrane protein 50B	TMEM50B	222907_x_at	0.2377	0.2545	0.2063	0.2152	0.1809	0.1609	-0.0592	0.2066	0.2099	0.2229	0.2428	0.2001	0.1685	0.1205	0.1281	0.2722	0.185494	0.0983	0.1621	0.2719	0.2399	0.2415	0.2419	0.269	0.1976	0.2826	0.031	0.0193	0.0113
chr14:88001874-88019092 (-) // 89.51 // q31.3	protein tyrosine phosphatase, non-receptor type 21	PTPN21	226380_at	0.1776	0.2468	0.1114	0.1496	0.0807	0.2007	-0.0309	0.2716	0.2494	0.2839	0.2396	0.2685	0.1177	0.1657	0.129	0.3056	0.185431	0.1129	0.1562	0.2862	0.1531	0.1531	0.1548	0.0913	-0.0308	0.1004	0.012	0.0049	0.0276
chr1:36333612-36334292 (-) // 98.41 // p34.3	collagen, type VIII, alpha 2	COL8A2	52651_at	0.197	0.1966	0.1554	0.2394	0.1774	0.2279	0.0004	0.2705	0.2986	0.2808	0.2509	0.2873	0.1927	0.0168	0.0162	0.1589	0.185425	0.2287	0.2376	0.299	0.2522	0.2542	0.2546	0.1363	0.0051	0.1332	0.0768	0.0806	0.0717
chr22:29011106-29015533 (-) // 96.49 // q12.2	TBC1 domain family, member 10A /// hypothetical protein LOC652968	LOC652968 /// TBC1D10A	226613_at	0.2212	0.2171	0.174	0.2315	0.2487	0.1577	-0.0313	0.218	0.249	0.2229	0.2459	0.2302	0.1678	0.0686	0.1243	0.2205	0.185381	0.1963	0.2118	0.2597	0.1898	0.1942	0.1965	0.2347	0.012	0.2	0.0095	0.0106	-0.021
chr5:37218863-37249987 (-) // 86.54 // p13.2	chromosome 5 open reading frame 42	C5orf42	1562387_at	0.2133	0.1963	0.3066	0.2533	0.2888	0.1918	0.1114	0.1732	0.1463	0.1506	0.1754	0.1272	0.2272	0.0721	0.1286	0.203	0.185319	0.046	0.1486	0.1946	0.2573	0.2533	0.2557	0.3015	0.1729	0.2984	-0.0561	-0.0521	-0.0694
chr18:9390076-9392418 (+) // 99.0 // p11.22	twisted gastrulation homolog 1 (Drosophila)	TWSG1	225406_at	0.1608	0.2074	0.1344	0.1935	0.1263	0.3113	0.1146	0.2516	0.2487	0.2621	0.2447	0.2566	0.1643	0.0873	0.0264	0.1742	0.185262	0.0479	0.0928	0.1842	0.1372	0.1338	0.1364	0.0831	-0.0142	0.0875	-0.0078	-0.0179	0.0089
chr10:105349266-105443371 (-) // 96.2 // q24.33	SH3 and PX domains 2A	SH3PXD2A	207661_s_at	0.1752	0.1358	0.1642	0.2199	0.2359	0.2516	0.146	0.2271	0.2112	0.1977	0.2173	0.1978	0.1826	0.1189	0.1598	0.1229	0.185244	0.1121	0.1468	0.2019	0.1792	0.1788	0.1837	0.191	0.0928	0.1986	-0.018	-0.0177	-0.0558
chr1:201976268-201979832 (+) // 97.74 // q32.1	ATPase, Ca++ transporting, plasma membrane 4	ATP2B4	212136_at	0.1321	0.1595	0.0835	0.1506	0.1084	0.1136	-0.0885	0.4198	0.3653	0.354	0.3154	0.3637	0.221	0.0036	0.0198	0.2409	0.185169	0.1382	0.1236	0.2371	0.0933	0.0999	0.1001	0.1726	0.06	0.1579	0.0079	0.0226	0.0165
chr8:27511568-27524745 (-) // 99.88 // p21.1	clusterin	CLU	208792_s_at	0.2347	0.2136	0.2221	0.284	0.2384	0.1221	-0.1035	0.2779	0.2679	0.2971	0.2745	0.2837	0.1371	-0.0396	-0.0255	0.2753	0.184987	0.2004	0.2797	0.3826	0.2978	0.2997	0.302	0.2417	0.023	0.2402	0.0231	0.0241	0.0371
chr9:72189644-72219360 (-) // 96.05 // q21.11	Kruppel-like factor 9	KLF9	203543_s_at	0.2188	0.2373	0.2064	0.2657	0.2117	0.1354	0.0182	0.24	0.2585	0.264	0.2795	0.2462	0.1451	0.0018	-0.0133	0.2423	0.18485	0.2211	0.3203	0.4085	0.3365	0.3364	0.3384	0.2572	0.112	0.2843	-0.099	-0.093	-0.1116
chr9:138991777-138996014 (+) // 81.04 // q34.3	prostaglandin D2 synthase 21kDa (brain)	PTGDS	212187_x_at	0.1606	0.1309	0.2224	0.2643	0.2357	0.1463	-0.066	0.2994	0.273	0.293	0.2744	0.2862	0.1484	0.012	0.0455	0.2256	0.184481	0.167	0.1965	0.2858	0.2024	0.2036	0.2055	0.285	0.0482	0.2732	-0.0665	-0.057	-0.0728
chr20:44561675-44562579 (-) // 90.32 // q13.12	Transcribed locus	---	238566_at	0.2092	0.1986	0.2024	0.2626	0.1916	0.1888	-0.0025	0.2475	0.264	0.2652	0.2828	0.2723	0.1591	0.009	0.0006	0.2002	0.184463	0.1609	0.1905	0.2499	0.1674	0.1674	0.1681	0.2456	0.046	0.2513	-0.0603	-0.0572	-0.05
chr2:36517050-36518777 (+) // 21.41 // p22.2	CDNA FLJ13557 fis, clone PLACE1007737	---	233073_at	0.2057	0.21	0.1468	0.2074	0.1666	0.1208	-0.0256	0.2925	0.2528	0.3134	0.2399	0.2971	0.1649	0.038	0.0346	0.2843	0.184325	0.2067	0.2302	0.3309	0.1945	0.1963	0.1967	0.2499	0.0489	0.255	-0.0305	-0.0306	-0.0278
chrX:102727075-102729099 (+) // 74.73 // q22.2	transcription elongation factor A (SII)-like 4	TCEAL4	202371_at	0.1666	0.1801	0.1361	0.1938	0.0974	0.2024	-0.0889	0.3821	0.3292	0.3528	0.3218	0.3634	0.226	-0.0185	-0.0479	0.1513	0.184231	0.105	0.1197	0.2001	0.1162	0.1188	0.1207	0.1158	-0.0578	0.1454	0.0913	0.088	0.1207
chr22:19108873-19111836 (-) // 93.46 // q11.21	scavenger receptor class F, member 2	SCARF2	227557_at	0.2162	0.1943	0.1028	0.1814	0.2441	0.3894	0.1806	0.2266	0.2217	0.2255	0.2334	0.2299	0.2008	-0.0385	-0.0327	0.1683	0.183987	0.0597	0.0816	0.1261	0.0934	0.0927	0.0975	0.0662	-0.0431	0.0656	-0.0118	-0.0147	-0.0178
chr15:97494051-97576351 (-) // 85.93 // q26.3	tetratricopeptide repeat domain 23	TTC23	219838_at	0.1719	0.191	0.1236	0.2029	0.1312	0.2777	0.0571	0.2299	0.2076	0.2341	0.2064	0.2305	0.1477	0.172	0.1489	0.2097	0.183887	0.0505	0.0886	0.1818	0.1198	0.1183	0.122	0.0435	-0.0818	0.0558	0.0216	0.0109	0.0227
chr16:73043201-73198513 (-) // 92.43 // q22.3	golgi apparatus protein 1	GLG1	212045_at	0.2015	0.1967	0.1248	0.2091	0.2071	0.2378	-0.0271	0.2541	0.2722	0.2742	0.2608	0.2744	0.1735	0.0523	0.0257	0.2043	0.183838	0.1745	0.1766	0.2542	0.1729	0.1747	0.1778	0.2822	0.0592	0.2146	-0.0299	-0.0377	-0.0494
chr12:32922063-32941041 (-) // 97.62 // p11.21	plakophilin 2	PKP2	214154_s_at	0.1917	0.1473	0.2409	0.2055	0.2842	0.1752	0.156	0.1277	0.1053	0.1151	0.1365	0.0958	0.138	0.352	0.362	0.1082	0.183837	0.0501	0.1796	0.1647	0.274	0.2756	0.2789	0.2291	0.0645	0.2094	0.0402	0.0329	0.0261
chr8:92029913-92030460 (+) // 62.37 // q21.3	Full length insert cDNA clone YP51C12	---	1561639_at	0.1691	0.1913	0.1429	0.2858	0.2028	0.1629	-0.076	0.2368	0.2982	0.2256	0.2884	0.253	0.2859	0.0574	0.0531	0.1638	0.183812	0.2776	0.1907	0.2504	0.1207	0.1341	0.1316	0.2898	0.0612	0.3235	-0.0298	0.0093	-0.0474
chr10:116185209-116276584 (-) // 97.64 // q25.3	actin binding LIM protein 1	ABLIM1	210461_s_at	0.2311	0.1959	0.3344	0.2461	0.2528	0.0967	-0.0387	0.234	0.1718	0.1874	0.1709	0.1665	0.2108	0.1108	0.1873	0.1828	0.183787	0.1229	0.2821	0.3008	0.3812	0.3835	0.3795	0.3549	0.3958	0.3502	-0.0355	-0.0347	-0.0419
chr11:6599136-6599308 (-) // 66.41 // p15.4	dachsous 1 (Drosophila)	DCHS1	222101_s_at	0.1272	0.1162	0.1476	0.1727	0.1703	0.1126	-0.0806	0.3885	0.3541	0.3656	0.3035	0.3776	0.2177	-0.0553	-0.0443	0.2669	0.183769	0.1383	0.1458	0.237	0.1221	0.1266	0.1272	0.1535	0.0049	0.1432	-0.0495	-0.0469	-0.039
chr7:129720249-129751253 (+) // 85.44 // q32.2	carboxypeptidase A4	CPA4	205832_at	0.1841	0.2088	0.187	0.2344	0.2628	0.242	0.1102	0.1527	0.1673	0.1591	0.168	0.1524	0.1619	0.1779	0.2027	0.1672	0.183656	0.0815	0.0983	0.1903	0.1689	0.1661	0.1674	0.0897	0.0151	0.09	-0.0017	0.0122	-0.0414
chr1:160868883-161016835 (+) // 99.9 // q23.3	discoidin domain receptor tyrosine kinase 2	DDR2	205168_at	0.2161	0.2249	0.1073	0.1692	0.1531	0.1994	0.038	0.3153	0.2639	0.3006	0.244	0.2927	0.1643	-0.0567	-0.0483	0.3533	0.183569	0.0829	0.1041	0.217	0.1109	0.113	0.1144	0.0953	-0.0195	0.0999	-0.0656	-0.0656	-0.0697
chr2:3480697-3502306 (-) // 98.22 // p25.3	acireductone dioxygenase 1	ADI1	217761_at	0.2675	0.3205	0.2145	0.2542	0.1705	0.1706	-0.028	0.1469	0.1853	0.1891	0.197	0.1793	0.1319	0.174	0.1211	0.2414	0.183488	0.1817	0.2653	0.3513	0.2833	0.284	0.2868	0.2215	0.0467	0.2163	0.0221	0.0114	0.0306
chr2:179036638-179037119 (-) // 93.47 // q31.2	Transcribed locus	---	231130_at	0.1414	0.1871	0.1462	0.1748	0.1285	0.3158	0.0414	0.2993	0.2744	0.3094	0.2796	0.3009	0.1916	-0.0275	-0.0473	0.2178	0.183338	0.0412	0.0848	0.2068	0.1424	0.1427	0.145	0.0723	-0.0134	0.071	-0.0465	-0.0512	-0.039
chr6:151720557-151721364 (+) // 83.78 // q25.1	A kinase (PRKA) anchor protein (gravin) 12	AKAP12	227529_s_at	0.1508	0.1798	0.1626	0.2429	0.2329	0.2837	0.0416	0.2778	0.2621	0.2601	0.2579	0.2479	0.183	-0.0376	-0.0524	0.2389	0.18325	0.1051	0.1421	0.2536	0.1673	0.1692	0.1727	0.1657	0.0253	0.1853	-0.1458	-0.141	-0.1621
chr5:140541163-140546158 (+) // 90.29 // q31.3	protocadherin beta 16	PCDHB16	232099_at	0.1957	0.1922	0.2033	0.265	0.1547	0.175	-0.0157	0.2418	0.2316	0.267	0.2253	0.2663	0.1514	0.0509	0.0402	0.2853	0.183125	0.1039	0.1273	0.2586	0.1397	0.1405	0.1432	0.2729	0.0612	0.2631	-0.0004	-0.003	0.0185
chr7:99560404-99561067 (+) // 82.4 // q22.1	canopy 4 homolog (zebrafish)	CNPY4	227313_at	0.2006	0.185	0.1278	0.1835	0.221	0.286	0.0628	0.3139	0.2658	0.2869	0.2516	0.2845	0.2266	-0.1124	-0.1073	0.2517	0.183	0.0854	0.1299	0.1939	0.1627	0.1629	0.1647	0.1537	0.0176	0.124	-0.0657	-0.0669	-0.0656
chr8:1794327-1839669 (+) // 84.73 // p23.3	Rho guanine nucleotide exchange factor (GEF) 10	ARHGEF10	1554703_at	0.1562	0.122	0.1499	0.2203	0.1098	0.1338	-0.0815	0.3641	0.2879	0.3497	0.2595	0.3597	0.1957	0.0411	0.0545	0.2039	0.182913	0.1622	0.1449	0.2427	0.0995	0.1025	0.1035	0.1391	-0.0207	0.1255	0.0561	0.0575	0.0938
chr9:35152058-35395331 (+) // 99.34 // p13.3	unc-13 homolog B (C. elegans)	UNC13B	202893_at	0.2555	0.263	0.1544	0.2212	0.1671	0.119	-0.0837	0.178	0.2001	0.2045	0.1964	0.1983	0.0905	0.3043	0.2846	0.1734	0.182912	0.1751	0.1893	0.2414	0.1526	0.1566	0.1579	0.1591	-0.0435	0.1771	0.1742	0.1592	0.1975
chr8:70576662-70735701 (+) // 98.84 // q13.2	sulfatase 1	SULF1	212344_at	0.1911	0.1718	0.134	0.1814	0.2267	0.2319	0.0411	0.2583	0.2483	0.2679	0.2355	0.2634	0.2063	0.0787	0.0705	0.1194	0.182894	0.1078	0.1827	0.2224	0.2447	0.245	0.245	0.1268	0.0099	0.1325	0.1087	0.0957	0.1214
chr15:86207772-86209836 (-) // 96.53 // q25.3	neurotrophic tyrosine kinase, receptor, type 3	NTRK3	215311_at	0.2227	0.1867	0.2254	0.2888	0.1953	0.1773	-0.0592	0.2378	0.2422	0.2557	0.2352	0.2598	0.1389	0.0493	0.0396	0.2256	0.182569	0.2164	0.2565	0.3337	0.212	0.2132	0.2154	0.3279	0.0705	0.2878	-0.0735	-0.0734	-0.0803
chr6:32116915-32185129 (-) // 99.81 // p21.32 /// chr6_cox_hap1:3416094-3484320 (-) // 99.82 // /// chr6_qbl_hap2:3223937-3270193 (-) // 76.48 //	tenascin XA pseudogene /// tenascin XB	TNXA /// TNXB	213451_x_at	0.1646	0.2116	0.1336	0.169	0.1248	0.0265	-0.069	0.3523	0.3064	0.3144	0.2526	0.3177	0.1775	0.0214	0.0563	0.3609	0.182537	0.2114	0.1845	0.3325	0.1223	0.1336	0.1329	0.1118	-0.005	0.1061	-0.0379	-0.0281	-0.0259
chrX:31047265-33056466 (-) // 99.25 // p21.2	dystrophin (muscular dystrophy, Duchenne and Becker types)	DMD	203881_s_at	0.3023	0.3748	0.2153	0.2385	0.1688	0.0905	0.0185	0.2172	0.2004	0.2165	0.195	0.2078	0.1187	-0.045	-0.0489	0.4478	0.182388	0.1395	0.1933	0.3416	0.234	0.2319	0.2328	0.1744	0.0388	0.1754	-0.1327	-0.1231	-0.1369
chr12:6809252-6819271 (+) // 98.64 // p13.31	leprecan-like 2 /// G protein-coupled receptor 162	GPR162 /// LEPREL2	204854_at	0.1744	0.1852	0.1286	0.1745	0.2634	0.3705	0.2232	0.2686	0.2489	0.2251	0.2122	0.2396	0.2305	-0.0711	-0.0674	0.1093	0.182219	0.0761	0.0953	0.1494	0.1131	0.1132	0.1147	0.0477	-0.0201	0.0463	-0.0491	-0.0424	-0.0501
chr9:131467937-131524770 (+) // 82.34 // q34.11	paired related homeobox 2	PRRX2	219729_at	0.1763	0.17	0.1705	0.2111	0.2452	0.3498	0.1436	0.2056	0.2023	0.2009	0.1825	0.2087	0.1615	0.0747	0.0969	0.1149	0.182156	0.1373	0.1298	0.1776	0.1072	0.113	0.1145	0.1084	-0.0362	0.1105	0.0526	0.0687	0.071
chr7:134114940-134297657 (+) // 94.7 // q33	caldesmon 1	CALD1	205525_at	0.0983	0.0825	0.0941	0.1523	0.0871	0.1257	-0.0703	0.453	0.3393	0.4241	0.3016	0.4308	0.219	0.0016	0.0029	0.1721	0.182131	0.1275	0.1571	0.2243	0.1153	0.1157	0.1182	0.1088	-0.0218	0.1104	0.0323	0.0304	0.0543
chr2:20095892-20114910 (-) // 100.0 // p24.1	lysosomal-associated protein transmembrane 4 alpha	LAPTM4A	200673_at	0.1673	0.2213	0.1321	0.179	0.0655	0.1284	-0.1016	0.2959	0.2655	0.2943	0.2392	0.2884	0.1512	0.1816	0.153	0.2526	0.182106	0.0868	0.1191	0.2611	0.1489	0.1519	0.1552	0.0625	-0.0253	0.0819	0.1996	0.1824	0.2281
chr9:138991777-138996014 (+) // 90.93 // q34.3	prostaglandin D2 synthase 21kDa (brain)	PTGDS	211663_x_at	0.1487	0.1172	0.2056	0.2722	0.2831	0.1407	0.071	0.2597	0.2496	0.2515	0.2558	0.2468	0.1505	0.0085	0.0407	0.21	0.181975	0.153	0.1872	0.2507	0.1673	0.1682	0.1703	0.2866	0.0652	0.2751	-0.0897	-0.0733	-0.1
chr5:92946397-92956073 (+) // 95.21 // q15	Nuclear receptor subfamily 2, group F, member 1	NR2F1	209505_at	0.2173	0.2236	0.1687	0.2784	0.1944	0.2174	0.0955	0.248	0.2503	0.2342	0.2445	0.2397	0.1569	-0.0603	-0.0707	0.2693	0.1817	0.1751	0.2102	0.2549	0.1845	0.1856	0.1878	0.1822	0.0167	0.1895	-0.0969	-0.0865	-0.1029
chr17:24065429-24068437 (-) // 93.74 // q11.2	RAB34, member RAS oncogene family	RAB34	1555630_a_at	0.195	0.2035	0.1071	0.1962	0.1572	0.4009	0.1423	0.2222	0.1918	0.199	0.2146	0.2005	0.2248	0.043	0.0285	0.1788	0.181588	0.048	0.0653	0.1047	0.0933	0.0944	0.0972	0.0389	-0.0463	0.054	0.0676	0.0692	0.0435
chr6:1641172-1642941 (-) // 60.61 // p25.3	CDNA FLJ20781 fis, clone COL04235	---	232779_at	0.1994	0.1778	0.4169	0.2741	0.1705	0.0794	-0.0263	0.2156	0.1892	0.2148	0.156	0.2023	0.1509	0.1536	0.1897	0.1409	0.18155	0.1721	0.2166	0.208	0.193	0.1866	0.1872	0.2332	0.1787	0.2421	0.0326	0.0421	0.0849
chr3:71087424-71090524 (-) // 95.97 // p14.1	forkhead box P1	FOXP1	224838_at	0.1837	0.1863	0.2042	0.2488	0.2234	0.1165	0.0224	0.2255	0.2806	0.2611	0.2565	0.2641	0.1301	0.0754	0.0523	0.1653	0.181013	0.2238	0.2488	0.3045	0.2088	0.2095	0.2087	0.3597	0.4603	0.3318	-0.0345	-0.0408	-0.0212
chr2:153210206-153210917 (+) // 79.54 // q23.3	CDNA FLJ39159 fis, clone OCBBF2002161	---	230663_at	0.2012	0.1687	0.1926	0.2683	0.1713	0.1367	-0.0421	0.2967	0.2736	0.2929	0.2742	0.3013	0.188	-0.0034	-0.0038	0.1779	0.180881	0.2779	0.2598	0.2948	0.1902	0.1916	0.1935	0.2863	0.2116	0.3108	-0.0594	-0.0526	-0.0548
chr3:120495909-120621657 (+) // 97.15 // q13.32	Cdc42 GTPase-activating protein	CDGAP	226056_at	0.2081	0.2105	0.1653	0.2462	0.2283	0.1683	0.0229	0.2577	0.2717	0.2788	0.2545	0.2699	0.1602	-0.061	-0.0734	0.2843	0.180769	0.2083	0.2495	0.343	0.2378	0.2388	0.2391	0.2563	0.1096	0.2522	-0.1269	-0.1223	-0.1367
chr3:196900842-196903089 (+) // 37.73 // q29 /// chr5:316698-318935 (+) // 45.22 // p15.33 /// chr3:197168872-197171096 (-) // 45.13 // q29	Mucin 20, cell surface associated	MUC20	1558220_at	0.212	0.1574	0.1758	0.1951	0.1615	0.0924	-0.1119	0.2977	0.2159	0.3113	0.2124	0.2993	0.1631	0.1284	0.1491	0.2311	0.180662	0.1308	0.1638	0.2671	0.168	0.1658	0.1688	0.2608	0.0421	0.2434	0.1131	0.1164	0.155
chr7:86347172-86347749 (-) // 100.0 // q21.12	KIAA1324-like	KIAA1324L	235301_at	0.1985	0.188	0.187	0.2471	0.2363	0.145	0.0457	0.2335	0.2248	0.2588	0.2572	0.2285	0.1454	0.0108	0.0181	0.2637	0.180525	0.1331	0.2481	0.3742	0.3713	0.3698	0.3639	0.2645	0.073	0.2599	-0.0695	-0.0673	-0.0704
chr18:309567-470759 (-) // 84.97 // p11.32	collectin sub-family member 12	COLEC12	221019_s_at	0.1514	0.1732	0.1518	0.1851	0.1331	0.2118	-0.0113	0.3102	0.3073	0.3149	0.2686	0.3133	0.2012	-0.0195	-0.0208	0.2171	0.180462	0.0983	0.1204	0.2176	0.139	0.141	0.1435	0.1316	-0.0006	0.1264	-0.0001	0.0018	0.0066
chr4:121976946-121977381 (-) // 80.18 // q27	Transcribed locus	---	242613_at	0.2285	0.2718	0.1372	0.2122	0.1538	0.2576	0.096	0.1678	0.1789	0.1707	0.2144	0.1681	0.1589	0.1504	0.0944	0.2262	0.180431	0.1223	0.147	0.2013	0.137	0.1404	0.1399	0.1303	0.0044	0.1375	-0.0732	-0.0667	-0.0773
chr15:74308960-74309593 (-) // 69.62 // q24.2	---	---	239830_at	0.229	0.2609	0.2845	0.1782	0.2021	0.0806	-0.1208	0.2745	0.2046	0.2313	0.1987	0.1992	0.1933	0.0121	0.0808	0.3779	0.180431	0.1293	0.2326	0.3537	0.2924	0.2934	0.2936	0.265	0.0774	0.2469	-0.0604	-0.0584	-0.0474
chr19:43486640-43487489 (+) // 90.15 // q13.2	chromosome 19 open reading frame 33	C19orf33	223631_s_at	0.1522	0.1368	0.1042	0.197	0.1493	0.1532	0.0688	0.0845	0.1187	0.119	0.1263	0.1232	0.1019	0.6405	0.5451	0.0657	0.1804	0.1031	0.1102	0.1313	0.0835	0.0866	0.0878	0.1667	0.0166	0.1563	0.2356	0.2269	0.2642
chr8:27511568-27524745 (-) // 99.88 // p21.1	clusterin	CLU	208791_at	0.2161	0.1927	0.2006	0.2816	0.2686	0.1118	-0.0468	0.2704	0.272	0.2761	0.276	0.2659	0.1494	-0.069	-0.0417	0.258	0.180106	0.2154	0.2887	0.3622	0.2965	0.299	0.3012	0.2229	0.0202	0.2332	-0.0079	-0.0012	-0.0087
chr12:56301134-56306197 (+) // 97.48 // q14.1	solute carrier family 26, member 10	SLC26A10	214951_at	0.1409	0.1326	0.18	0.2487	0.1757	0.164	-0.002	0.3112	0.2954	0.2892	0.2649	0.3	0.1989	-0.0025	0.0032	0.1793	0.179969	0.1526	0.149	0.2068	0.0938	0.0986	0.0986	0.1897	0.0107	0.1918	-0.0474	-0.0348	-0.0435
chr12:13240923-13260974 (+) // 98.6 // p13.1	epithelial membrane protein 1	EMP1	201325_s_at	0.2008	0.252	0.1272	0.1699	0.1347	0.1749	0.023	0.17	0.1866	0.1636	0.1655	0.1548	0.1376	0.2327	0.2438	0.3421	0.17995	0.1058	0.1467	0.2523	0.1813	0.1846	0.1855	0.107	0.0027	0.1266	-0.014	-0.0101	-0.0137
chr2:215952656-215953337 (-) // 52.95 // q35	fibronectin 1	FN1	1558199_at	0.1775	0.1707	0.1846	0.2035	0.249	0.3189	0.1025	0.237	0.2071	0.2202	0.1928	0.2212	0.2374	-0.0022	0.0153	0.1413	0.1798	0.069	0.1129	0.191	0.1711	0.1681	0.1708	0.2044	0.0934	0.2087	0.006	0.0047	0.0149
chr2:139143196-139143663 (-) // 99.79 // q22.1	Transcribed locus	---	230883_at	0.23	0.2091	0.1982	0.2805	0.1669	0.1822	0.011	0.2473	0.2364	0.259	0.2282	0.2496	0.1559	0.021	0.0126	0.1877	0.179725	0.2277	0.3654	0.4144	0.4618	0.4579	0.4486	0.2337	0.0688	0.2235	-0.0419	-0.0407	-0.0444
chr17:37809461-37829061 (-) // 98.81 // q21.31	polymerase I and transcript release factor	PTRF	208790_s_at	0.147	0.1709	0.1304	0.164	0.2466	0.2714	0.1053	0.3104	0.2294	0.2198	0.2012	0.2311	0.2573	-0.0186	0.0201	0.1887	0.179687	0.0601	0.0827	0.1705	0.1037	0.1054	0.1079	0.0726	-0.0092	0.0769	-0.0855	-0.0779	-0.0996
chr8:1811623-1863075 (+) // 99.22 // p23.3	Rho guanine nucleotide exchange factor (GEF) 10	ARHGEF10	1554213_at	0.1289	0.1006	0.1666	0.2138	0.1482	0.0891	-0.0821	0.3894	0.3025	0.3214	0.254	0.3378	0.2793	-0.004	0.054	0.175	0.179656	0.223	0.1966	0.2412	0.1159	0.125	0.1246	0.1468	-0.0269	0.14	0.0393	0.0628	0.0547
chr10:29791879-29793208 (+) // 89.63 // p11.23	Clone 23676 mRNA sequence	---	215279_at	0.1902	0.146	0.1038	0.2135	0.1294	0.0407	-0.094	0.3825	0.3226	0.3561	0.2785	0.376	0.2319	-0.0077	0.0246	0.1789	0.179563	0.2482	0.2083	0.2759	0.1031	0.1111	0.1127	0.2222	-0.0259	0.2046	0.1021	0.1122	0.1329
chr6:94008524-94185965 (-) // 99.45 // q16.1	EPH receptor A7	EPHA7	206852_at	0.1985	0.1905	0.2484	0.2549	0.3097	0.191	0.0681	0.1618	0.1512	0.1644	0.1857	0.1475	0.1395	0.0471	0.0749	0.3394	0.179537	0.0421	0.083	0.193	0.2005	0.1964	0.2021	0.1905	0.0565	0.1713	-0.028	-0.0282	-0.0291
chr3:73059109-73060641 (+) // 49.06 // p13	CDNA FLJ11512 fis, clone HEMBA1002204	---	234076_at	0.1858	0.1419	0.1552	0.2008	0.2487	0.0665	0.1874	0.2842	0.2578	0.2514	0.2106	0.2662	0.2517	0.0043	0.0502	0.1094	0.179506	0.1469	0.167	0.1817	0.1245	0.1306	0.1286	0.2027	-0.0093	0.1808	0.0364	0.0555	0.0611
chr10:18625524-18627304 (+) // 52.88 // p12.33	calcium channel, voltage-dependent, beta 2 subunit	CACNB2	215365_at	0.1897	0.1602	0.146	0.219	0.2604	0.0785	0.1514	0.275	0.2463	0.2384	0.2207	0.2492	0.2211	0.0549	0.0782	0.0794	0.179275	0.2364	0.2198	0.1957	0.1393	0.1441	0.1456	0.2413	0.0098	0.2275	-0.0217	-0.0059	-0.0246
chr6:57159752-57160212 (-) // 98.08 // p12.1	Transcribed locus	---	229504_at	0.1575	0.1977	0.1143	0.1723	0.1276	0.2703	0.0752	0.3053	0.274	0.2921	0.2705	0.2911	0.1666	-0.0089	-0.0365	0.1982	0.179206	0.0782	0.1263	0.1983	0.1459	0.1432	0.1455	0.0797	-0.012	0.0889	-0.0949	-0.0923	-0.0961
chr6:151688515-151719601 (+) // 99.97 // q25.1	A kinase (PRKA) anchor protein (gravin) 12	AKAP12	210517_s_at	0.152	0.1845	0.1592	0.2352	0.2211	0.2956	0.0223	0.2698	0.2424	0.2574	0.2485	0.2467	0.1908	-0.0475	-0.0498	0.2384	0.179163	0.0911	0.1332	0.2489	0.1751	0.176	0.18	0.1449	0.0005	0.1576	-0.1282	-0.1258	-0.1392
chr12:8689805-8690789 (-) // 69.72 // p13.31	microfibrillar associated protein 5	MFAP5	213765_at	0.2122	0.2813	0.1396	0.1384	0.1109	0.1339	-0.0384	0.3005	0.2681	0.2822	0.2292	0.2675	0.1397	0.002	0.0107	0.3885	0.179144	0.138	0.2121	0.3557	0.2488	0.2532	0.2501	0.1155	0.0114	0.1105	-0.0332	-0.0341	-0.0305
chr8:119117504-119117968 (-) // 20.69 // q24.11	Transcribed locus	---	237310_at	0.1608	0.1441	0.1151	0.2269	0.1535	0.0801	-0.0536	0.2772	0.2555	0.3095	0.2123	0.327	0.13	0.2005	0.1931	0.1329	0.179056	0.2438	0.2644	0.3274	0.1823	0.1833	0.1862	0.179	0.0272	0.1579	0.1012	0.0996	0.162
chr17:24065369-24069073 (-) // 95.46 // q11.2	RAB34, member RAS oncogene family	RAB34	224710_at	0.1879	0.1933	0.1075	0.1957	0.1473	0.3834	0.1479	0.2262	0.1955	0.2049	0.2053	0.2108	0.219	0.0438	0.024	0.1716	0.179006	0.0485	0.0593	0.0979	0.0737	0.0751	0.0779	0.0354	-0.0522	0.0453	0.0763	0.0797	0.0674
chr21:46248916-46249390 (+) // 74.29 // q22.3	collagen, type VI, alpha 1	COL6A1	213428_s_at	0.1312	0.1792	0.0944	0.115	0.0873	0.3019	0.0145	0.3393	0.2977	0.3178	0.2426	0.3248	0.1844	0.002	0.0083	0.2219	0.178894	0.0643	0.0679	0.1772	0.069	0.0722	0.074	0.0185	-0.0521	0.0285	0.1086	0.1069	0.1342
chr2:164267801-164269550 (-) // 86.55 // q24.3	CDNA FLJ10946 fis, clone PLACE1000005	---	234074_at	0.2163	0.1704	0.123	0.2282	0.1281	0.1135	-0.0403	0.3181	0.266	0.346	0.2377	0.3456	0.166	-0.015	-0.0083	0.2633	0.178662	0.2323	0.2548	0.3121	0.2139	0.2124	0.2121	0.2299	0.0219	0.203	-0.0143	-0.0103	0.0083
chr4:83959198-84040715 (-) // 99.54 // q21.22	SEC31 homolog A (S. cerevisiae)	SEC31A	210616_s_at	0.1561	0.155	0.1614	0.1785	0.2402	0.2105	0.0698	0.3203	0.2525	0.2534	0.2114	0.2634	0.1936	-0.0101	0.0496	0.1525	0.178631	0.0698	0.1151	0.2073	0.1766	0.1773	0.1795	0.068	-0.0092	0.0738	0.0766	0.0616	0.0634
chr1:169484286-169521735 (+) // 99.53 // q24.3	flavin containing monooxygenase 1	FMO1	205666_at	0.1821	0.1763	0.2	0.2456	0.1866	0.0939	-0.0046	0.2844	0.2593	0.2822	0.231	0.2781	0.1908	0.0188	0.0243	0.2092	0.178625	0.1754	0.2491	0.3171	0.3009	0.3025	0.2993	0.1697	0.0371	0.1542	0.0134	0.0138	0.0312
chr19:39683200-39683918 (+) // 91.76 // q13.11	Wilms tumor 1 interacting protein	WTIP	227411_at	0.1562	0.1961	0.1369	0.1949	0.2115	0.2308	0.1822	0.2812	0.2553	0.2211	0.2029	0.2409	0.2002	-0.036	-0.0262	0.2098	0.178612	0.1097	0.0825	0.1685	0.0418	0.0461	0.047	0.0484	-0.0537	0.0599	-0.0156	-0.0066	-0.0095
chr10:24847696-24849562 (+) // 73.82 // p12.1	KIAA1217	KIAA1217	232762_at	0.211	0.1926	0.1639	0.206	0.1132	0.0305	-0.0995	0.2493	0.2349	0.302	0.1968	0.3036	0.1325	0.2383	0.2193	0.1628	0.178575	0.1462	0.1536	0.2242	0.104	0.105	0.1072	0.1573	-0.0152	0.1614	0.3256	0.3134	0.4123
chr2:3481231-3502295 (-) // 94.12 // p25.3	acireductone dioxygenase 1	ADI1	222400_s_at	0.2803	0.2758	0.1801	0.2341	0.219	0.1705	0.0207	0.1547	0.1619	0.182	0.1733	0.1717	0.134	0.144	0.1461	0.2087	0.178556	0.1598	0.2588	0.3278	0.3022	0.3017	0.3065	0.1706	-0.0292	0.175	0.073	0.0628	0.0672
chr10:49892295-49895690 (-) // 85.17 // q11.22	Chromosome 10 open reading frame 72	C10orf72	213381_at	0.1465	0.1695	0.1586	0.1971	0.1704	0.1065	0.063	0.3071	0.2894	0.306	0.2671	0.3019	0.1492	-0.0185	-0.0166	0.2555	0.178294	0.1026	0.1242	0.2552	0.1291	0.1299	0.1312	0.1713	0.0175	0.183	-0.0497	-0.0482	-0.0266
chr14:23938044-23958328 (+) // 91.78 // q12	KIAA1305	KIAA1305	220911_s_at	0.2105	0.2013	0.1023	0.1938	0.1255	0.1161	-0.0804	0.2415	0.2457	0.2563	0.2275	0.2668	0.1027	0.2165	0.2246	0.2001	0.178175	0.1863	0.1623	0.2395	0.1362	0.1388	0.1398	0.1119	-0.0294	0.111	0.2115	0.1934	0.1818
chr12:21845244-21980875 (-) // 99.76 // p12.1	ATP-binding cassette, sub-family C (CFTR/MRP), member 9	ABCC9	208561_at	0.2138	0.2237	0.1784	0.205	0.2306	0.1574	0.0731	0.2105	0.1923	0.2212	0.1845	0.1969	0.1531	0.0214	0.0528	0.3336	0.178019	0.0875	0.2247	0.3305	0.3473	0.3432	0.3453	0.15	0.0369	0.1339	-0.051	-0.0479	-0.0608
chr10:99463470-99467895 (+) // 91.24 // q24.2	MARVEL domain containing 1	MARVELD1	223095_at	0.0982	0.1327	0.1164	0.1749	0.1373	0.3431	0.1307	0.2562	0.2451	0.2193	0.2082	0.2397	0.204	0.124	0.0819	0.1341	0.177863	0.0491	0.0422	0.12	0.0561	0.0592	0.0618	0.0052	-0.0342	0.0195	0.0375	0.0421	0.04
chr15:94670756-94671413 (+) // 90.3 // q26.2	Similar to hCG1774772	LOC100132798	242396_at	0.1269	0.1051	0.1147	0.1645	0.14	0.143	0.0871	0.3788	0.2876	0.3152	0.2507	0.3201	0.2521	0.0001	0.03	0.1282	0.177756	0.0865	0.1123	0.1536	0.1131	0.1155	0.1152	0.126	0.0158	0.1046	0.0403	0.0432	0.0623
chr15:61131741-61132108 (+) // 67.09 // q22.2	---	---	241400_at	0.0998	0.1169	0.1354	0.1677	0.1063	0.096	-0.024	0.4111	0.3345	0.3072	0.2666	0.3374	0.2525	0.062	0.0708	0.1036	0.177738	0.1247	0.1073	0.1673	0.0564	0.0638	0.0632	0.1102	-0.0096	0.1145	0.0573	0.0726	0.0904
chr7:134225104-134227039 (+) // 80.66 // q33	caldesmon 1	CALD1	215199_at	0.0967	0.0848	0.0721	0.1484	0.0919	0.1202	-0.0403	0.4369	0.3497	0.3901	0.3058	0.4017	0.2357	0.0194	0.0143	0.1127	0.177506	0.1513	0.1605	0.1999	0.0991	0.1016	0.1037	0.1296	-0.0007	0.1266	0.0409	0.0383	0.0491
chr3:147392815-147451560 (-) // 98.03 // q24	phospholipid scramblase 4	PLSCR4	218901_at	0.1374	0.184	0.1348	0.1863	0.1479	0.0603	-0.1128	0.3151	0.3053	0.3168	0.275	0.3172	0.1582	0.0556	0.0226	0.3361	0.177488	0.1756	0.219	0.385	0.2246	0.2266	0.2292	0.127	-0.014	0.1349	-0.0148	-0.0201	0.0089
chr11:117629344-117640207 (-) // 99.24 // q23.3	myelin protein zero-like 2	MPZL2	203780_at	0.1551	0.1348	0.1707	0.2309	0.1335	0.1111	-0.0205	0.1155	0.1347	0.1506	0.1508	0.1418	0.1125	0.5636	0.4858	0.0682	0.177444	0.1057	0.1393	0.1789	0.1613	0.1644	0.1641	0.1761	0.0453	0.1926	0.1982	0.1933	0.2136
chr10:24761554-24876778 (+) // 95.07 // p12.1	KIAA1217	KIAA1217	231807_at	0.2091	0.2463	0.1534	0.2074	0.1122	0.0796	-0.0269	0.2083	0.2271	0.2587	0.2049	0.2505	0.0989	0.2365	0.1765	0.1954	0.177369	0.1026	0.1485	0.227	0.1222	0.1225	0.1236	0.1405	0.0055	0.1475	0.2127	0.2053	0.2933
chr15:61146813-61148236 (+) // 90.17 // q22.2	Tropomyosin 1 (alpha)	TPM1	238688_at	0.1048	0.0813	0.1647	0.1456	0.1435	0.1261	-0.0346	0.451	0.3108	0.3038	0.2531	0.3158	0.2924	0.0064	0.0742	0.0979	0.1773	0.1012	0.1276	0.1674	0.1368	0.1383	0.1381	0.1469	0.0086	0.1486	0.0759	0.0714	0.0841
chr7:134271301-134273932 (+) // 94.72 // q33	caldesmon 1	CALD1	231881_at	0.1521	0.1508	0.152	0.1961	0.1977	0.2155	0.1279	0.2958	0.2267	0.2459	0.199	0.25	0.2656	-0.0015	0.0376	0.1232	0.17715	0.0735	0.147	0.1739	0.1919	0.1884	0.1903	0.1323	0.0088	0.1317	-0.0217	-0.0163	-0.0203
chr11:17066386-17066950 (-) // 50.27 // p15.1	phosphoinositide-3-kinase, class 2, alpha polypeptide	PIK3C2A	235792_x_at	0.1955	0.107	0.1153	0.2082	0.1545	0.1192	-0.0638	0.3118	0.2246	0.3244	0.2555	0.3134	0.1814	0.0985	0.1059	0.1813	0.177044	0.1425	0.2059	0.253	0.1697	0.1689	0.1716	0.2418	-0.0438	0.238	0.0501	0.0489	0.0832
chr3:71323364-71323761 (-) // 98.76 // p14.1	Clone IMAGE:110578 mRNA sequence	---	243878_at	0.2281	0.1859	0.225	0.2507	0.2426	0.1274	-0.0219	0.2258	0.2215	0.2365	0.2157	0.234	0.1756	0.0472	0.0529	0.1849	0.176994	0.1818	0.2448	0.285	0.213	0.2126	0.2119	0.3817	0.4893	0.3665	-0.0434	-0.042	-0.0425
chr6:1854304-1854886 (-) // 97.15 // p25.3	Transcribed locus	---	230357_at	0.1777	0.1742	0.2843	0.274	0.1822	0.1459	0.0773	0.1104	0.1704	0.1386	0.1689	0.1326	0.1401	0.2874	0.2606	0.1064	0.176937	0.11	0.1579	0.1484	0.1774	0.1748	0.1756	0.1603	0.0279	0.1575	0.0221	0.0107	0.0037
chr6:26203739-26204354 (+) // 73.83 // p22.1	hemochromatosis	HFE	235754_at	0.1662	0.1898	0.149	0.2313	0.176	0.2347	0.0738	0.199	0.2112	0.1845	0.2209	0.1886	0.1929	0.1328	0.1187	0.1584	0.176737	0.1649	0.186	0.2547	0.1857	0.1886	0.1918	0.1717	0	0.1679	0.024	0.0343	-0.0117
chr1:12338671-12494686 (+) // 97.21 // p36.22	vacuolar protein sorting 13 homolog D (S. cerevisiae)	VPS13D	212326_at	0.247	0.2424	0.1932	0.2263	0.1696	0.0711	-0.1278	0.245	0.2372	0.2608	0.2414	0.2459	0.1081	0.1062	0.1188	0.241	0.176637	0.2262	0.3334	0.3755	0.3218	0.3183	0.3164	0.2493	0.0571	0.2132	0.0069	-0.0026	0.0062
chr15:64791059-64861380 (+) // 84.61 // q22.31	SMAD family member 6	SMAD6	207069_s_at	0.2185	0.2373	0.1735	0.2382	0.2442	0.1822	0.0547	0.1927	0.1764	0.1822	0.169	0.176	0.17	0.0954	0.0697	0.2447	0.176544	0.1073	0.1676	0.2503	0.2065	0.2075	0.2092	0.1397	0.005	0.1432	0.0003	-0.0014	0.0087
chr17:72183403-72184642 (-) // 64.72 // q25.1	matrix-remodelling associated 7	MXRA7	227326_at	0.1561	0.2392	0.1479	0.1855	0.1707	0.308	0.1607	0.2527	0.2499	0.2343	0.2147	0.2344	0.1448	-0.0512	-0.0581	0.2342	0.176487	0.0719	0.1092	0.2344	0.1467	0.1471	0.1508	0.0717	0.0091	0.0772	-0.0924	-0.0853	-0.0885
chr1:12585971-12586643 (-) // 99.26 // p36.22	---	---	241515_at	0.231	0.1789	0.1432	0.2156	0.2302	0.0656	0.2209	0.224	0.1839	0.2076	0.1423	0.2179	0.2124	0.1166	0.1403	0.0913	0.176356	0.1927	0.24	0.2417	0.1888	0.1925	0.1909	0.2424	0.0788	0.1861	0.0608	0.0782	0.1042
chr6:112662068-112662652 (-) // 97.01 // q21	Full length insert cDNA clone YI44E03	---	1556935_at	0.1742	0.1734	0.1079	0.1721	0.1068	0.0796	-0.0871	0.3363	0.2835	0.3453	0.2207	0.3498	0.1952	0.0259	0.0267	0.3103	0.176287	0.1132	0.1195	0.2544	0.083	0.0871	0.0882	0.1821	0.0253	0.1542	0.018	0.0198	0.041
chr3:192032008-192035394 (+) // 89.02 // q28 /// chr1:223749802-223769071 (-) // 98.2 // q42.12	enabled homolog (Drosophila)	ENAH	217820_s_at	0.2212	0.2895	0.2362	0.2453	0.1072	0.2846	0.0518	0.2225	0.1773	0.1933	0.2009	0.1824	0.1526	0.0341	0.0173	0.204	0.176262	0.0373	0.0886	0.1646	0.1534	0.1523	0.1537	0.0914	-0.0205	0.1072	0.0395	0.0347	0.0415
chr12:41138420-41138886 (-) // 96.07 // q12	Prickle homolog 1 (Drosophila)	PRICKLE1	230708_at	0.179	0.192	0.1728	0.2504	0.2056	0.1788	0.0674	0.23	0.2381	0.2427	0.245	0.2442	0.1635	0.026	-0.0052	0.1881	0.17615	0.142	0.1909	0.2773	0.217	0.2159	0.2166	0.2059	0.1559	0.2209	-0.0438	-0.0428	-0.0343
chrX:100797108-100801478 (-) // 98.47 // q22.1	armadillo repeat containing, X-linked 2	ARMCX2	203404_at	0.2195	0.2	0.1572	0.2018	0.2752	0.263	0.0703	0.2617	0.2324	0.2516	0.2481	0.2496	0.1924	-0.1073	-0.0964	0.1975	0.176038	0.0722	0.1165	0.1698	0.1513	0.1517	0.1537	0.1065	-0.0221	0.1203	0.0295	0.0283	0.0409
chr11:17064697-17066657 (-) // 84.8 // p15.1	phosphoinositide-3-kinase, class 2, alpha polypeptide	PIK3C2A	213070_at	0.1779	0.1919	0.1525	0.2056	0.1187	0.2027	-0.1305	0.2315	0.2418	0.2715	0.2831	0.2538	0.1605	0.1377	0.0411	0.2753	0.175944	0.1453	0.2005	0.2995	0.2005	0.1987	0.2014	0.2137	-0.0003	0.2118	-0.027	-0.0437	-0.0181
chr11:113629859-113630327 (+) // 83.64 // q23.2	Transcribed locus	---	227762_at	0.2875	0.3048	0.1777	0.1997	0.1719	0.0693	-0.0942	0.2795	0.2557	0.2784	0.2508	0.2619	0.1368	-0.0293	0.0071	0.2562	0.175862	0.2866	0.3131	0.3489	0.2392	0.2448	0.2442	0.263	0.0562	0.2673	-0.0836	-0.0737	-0.0827
chr15:67393795-67483897 (+) // 87.32 // q23	progestin and adipoQ receptor family member V	PAQR5	220333_at	0.1368	0.1127	0.2021	0.2347	0.2824	0.2075	0.1474	0.1533	0.1246	0.1464	0.1743	0.1326	0.2039	0.2178	0.218	0.1179	0.175775	0.0706	0.0968	0.1307	0.1291	0.1272	0.1322	0.2689	0.0822	0.2709	-0.0143	-0.0065	-0.0161
chr13:113546912-113590396 (+) // 96.79 // q34	growth arrest-specific 6 /// similar to growth arrest-specific 6	GAS6 /// LOC100133684	1598_g_at	0.0987	0.1163	0.0999	0.1167	0.1376	0.3301	0.0543	0.3106	0.2695	0.2606	0.2302	0.2768	0.195	0.1009	0.1184	0.096	0.175725	0.1328	0.1126	0.1834	0.0886	0.0923	0.0935	0.0504	-0.0465	0.0628	0.0844	0.0984	0.1025
chr16:71378456-71650035 (-) // 96.82 // q22.3	zinc finger homeobox 3	ZFHX3	208033_s_at	0.2783	0.2561	0.125	0.2157	0.2084	0.1119	0.008	0.2424	0.2402	0.2148	0.2094	0.2221	0.1292	0.0331	0.0435	0.273	0.175694	0.2494	0.2095	0.2248	0.1537	0.1608	0.1617	0.103	-0.0126	0.1273	0.0464	0.046	0.0169
chr22:17280207-17289087 (-) // 83.59 // q11.21	proline dehydrogenase (oxidase) 1	PRODH	214203_s_at	0.1718	0.1571	0.1563	0.2569	0.2517	0.1404	-0.0038	0.1921	0.2176	0.1901	0.2231	0.2081	0.1796	0.1517	0.1362	0.1663	0.1747	0.2002	0.1663	0.236	0.1139	0.1206	0.1214	0.2333	0.0297	0.2223	0.1053	0.112	0.096
chr11:111353335-111397913 (+) // 92.99 // q23.1	DIX domain containing 1	DIXDC1	214724_at	0.222	0.2395	0.1424	0.1972	0.1465	0.1518	-0.1346	0.3003	0.2589	0.2968	0.2725	0.2838	0.1276	-0.0358	-0.0275	0.3524	0.174613	0.1002	0.1275	0.2617	0.1259	0.1288	0.131	0.1537	-0.0197	0.1711	-0.0365	-0.0394	-0.0343
chr7:136562627-136679118 (-) // 93.63 // q33	pleiotrophin (heparin binding growth factor 8, neurite growth-promoting factor 1)	PTN	209465_x_at	0.2046	0.196	0.1971	0.2526	0.172	0.1872	-0.0336	0.2333	0.2653	0.2521	0.2666	0.2532	0.1431	-0.0036	-0.0103	0.2177	0.174581	0.2009	0.2124	0.2443	0.1749	0.1791	0.1816	0.2298	0.0445	0.224	-0.0867	-0.0807	-0.0923
chr7:134225104-134227039 (+) // 80.66 // q33	caldesmon 1	CALD1	215198_s_at	0.0961	0.0788	0.0972	0.1452	0.1005	0.0979	0.0373	0.4421	0.3184	0.373	0.2734	0.3816	0.2279	-0.0232	-0.0001	0.1465	0.174537	0.0989	0.1347	0.1924	0.0946	0.0962	0.0986	0.103	-0.0244	0.1028	0.009	0.009	0.0302
chr1:161019427-161020740 (+) // 99.32 // q23.3 /// chr10:38677607-38678927 (+) // 96.66 // p11.21	discoidin domain receptor tyrosine kinase 2	DDR2	227561_at	0.2005	0.2315	0.0521	0.1485	0.1001	0.1496	0.0354	0.308	0.2751	0.3278	0.2293	0.3307	0.1471	-0.045	-0.0652	0.3646	0.174381	0.0654	0.0809	0.2197	0.0825	0.0843	0.0867	0.0689	-0.0313	0.0711	-0.028	-0.0294	-0.0049
chr1:168974564-168975165 (+) // 92.46 // q24.2	paired related homeobox 1	PRRX1	226695_at	0.2048	0.2559	0.1146	0.1473	0.0735	0.2289	0.0245	0.2983	0.2621	0.3004	0.2197	0.2946	0.1462	-0.0231	-0.0222	0.2634	0.174306	0.092	0.1409	0.2445	0.1748	0.1794	0.1783	0.046	-0.0269	0.0494	0.0364	0.0336	0.0531
chr1:87566738-87583851 (+) // 87.16 // p22.3	LIM domain only 4	LMO4	209204_at	0.259	0.2593	0.2947	0.2644	0.2119	0.1637	0.0496	0.185	0.1932	0.1836	0.1949	0.1759	0.117	0.0002	0.0263	0.2094	0.174256	0.1755	0.2662	0.2653	0.2254	0.2287	0.2266	0.2298	0.039	0.1987	-0.0764	-0.0769	-0.0858
chr15:38444365-38450547 (+) // 98.63 // q15.1	dispatched homolog 2 (Drosophila)	DISP2	229579_s_at	0.206	0.1897	0.1582	0.2591	0.2092	0.1998	-0.0122	0.2119	0.2595	0.2298	0.2444	0.2423	0.146	0.0585	0.0343	0.1506	0.174194	0.275	0.2799	0.2882	0.2226	0.2255	0.2245	0.2619	0.0301	0.2458	-0.089	-0.0812	-0.0951
chr11:44910475-44912696 (-) // 92.31 // p11.2	tumor protein p53 inducible protein 11	TP53I11	203421_at	0.193	0.1768	0.1453	0.2554	0.2351	0.126	0.1052	0.2086	0.2201	0.2052	0.2072	0.2176	0.1249	0.0994	0.1091	0.1579	0.174175	0.1472	0.1016	0.1611	0.0346	0.039	0.0402	0.2914	0.0419	0.2836	0.1058	0.1	0.1126
chr20:25381461-25387612 (-) // 99.67 // p11.21	ninein-like	RP4-691N24.1	207705_s_at	0.1622	0.1481	0.137	0.2275	0.1291	0.138	-0.0842	0.3345	0.3124	0.3251	0.2843	0.336	0.2046	-0.0089	-0.0057	0.1455	0.174094	0.2022	0.1962	0.2415	0.1365	0.1417	0.1424	0.2027	0.0049	0.2012	0.0137	0.0186	0.0392
chr1:23757018-23758556 (-) // 92.46 // p36.12	inhibitor of DNA binding 3, dominant negative helix-loop-helix protein	ID3	207826_s_at	0.1999	0.1974	0.1457	0.2094	0.2157	0.2713	0.0858	0.1881	0.1601	0.1705	0.1745	0.1693	0.1849	0.0969	0.0823	0.2335	0.174081	0.0858	0.1478	0.1784	0.184	0.184	0.1861	0.103	-0.0205	0.1081	-0.0484	-0.0557	-0.0542
chr10:46379949-46387452 (-) // 75.43 // q11.22	synaptotagmin XV	SYT15	1560879_a_at	0.1827	0.1983	0.1787	0.2677	0.2174	0.2182	0.0791	0.2096	0.2105	0.1958	0.1995	0.1972	0.2028	0.0348	0.0376	0.1525	0.1739	0.1938	0.2065	0.2723	0.2235	0.2253	0.2244	0.1768	0.0522	0.1789	-0.0464	-0.0263	-0.0567
chr12:61324034-61512313 (-) // 99.05 // q14.1	protein phosphatase 1H (PP2C domain containing)	PPM1H	212686_at	0.2227	0.1983	0.1835	0.2895	0.2169	0.1469	-0.0519	0.1988	0.2409	0.2362	0.2492	0.2343	0.1258	0.0745	0.0522	0.1641	0.173869	0.188	0.1989	0.2805	0.1962	0.1969	0.1975	0.2743	0.0568	0.2874	0.0768	0.0669	0.0772
chr7:78928688-78930470 (+) // 63.08 // q21.11	MRNA; cDNA DKFZp686I18116 (from clone DKFZp686I18116)	---	227554_at	0.1621	0.2193	0.1512	0.1829	0.1621	0.2286	0.0005	0.2848	0.2679	0.2686	0.2513	0.2614	0.2022	-0.0906	-0.0907	0.3197	0.173831	0.1159	0.1488	0.2799	0.164	0.1656	0.1667	0.1146	-0.0038	0.1241	-0.1238	-0.118	-0.1361
chr2:140705465-142605740 (-) // 99.39 // q22.1	low density lipoprotein-related protein 1B (deleted in tumors)	LRP1B	219643_at	0.2764	0.2616	0.1744	0.2467	0.2278	0.1297	0.0492	0.1852	0.2206	0.2139	0.2458	0.1996	0.1474	-0.0166	-0.0122	0.2312	0.173794	0.1648	0.2486	0.2847	0.2552	0.2579	0.2575	0.2822	0.0829	0.287	-0.1045	-0.0957	-0.1144
chr6:112641614-112682490 (-) // 86.13 // q21	laminin, alpha 4	LAMA4	210990_s_at	0.1847	0.2172	0.2095	0.1724	0.2513	0.1981	0.06	0.2428	0.1903	0.2007	0.1798	0.1799	0.2485	-0.0459	0.0079	0.2827	0.173744	0.0394	0.1314	0.2265	0.2299	0.2301	0.2345	0.1348	0.0143	0.1282	-0.0866	-0.0839	-0.1041
chr10:93233826-93239706 (+) // 91.76 // q23.32	HECT domain containing 2	HECTD2	1565699_at	0.2433	0.2017	0.1992	0.2081	0.2037	0.157	0.0944	0.2202	0.189	0.2489	0.2261	0.2235	0.1491	0.0204	0.0415	0.1504	0.173531	0.1593	0.2663	0.2576	0.3115	0.3042	0.3046	0.2019	0.0568	0.2005	-0.043	-0.0436	-0.0405
chr2:236898071-236965455 (-) // 66.85 // q37.2	IQ motif containing with AAA domain	IQCA	220274_at	0.2763	0.2335	0.1426	0.231	0.2179	0.0938	0.0271	0.2067	0.2105	0.196	0.1986	0.1962	0.1583	0.1434	0.1626	0.0814	0.173494	0.1929	0.2077	0.1927	0.1673	0.1715	0.1712	0.1825	0.0115	0.1886	0.1179	0.1217	0.1049
chr2:206368620-206369463 (+) // 86.74 // q33.3	neuropilin 2	NRP2	229225_at	0.1569	0.1242	0.1397	0.1532	0.172	0.2014	0.0347	0.3114	0.2419	0.2825	0.2429	0.2824	0.2653	0.0017	0.0258	0.1393	0.173456	0.0639	0.1379	0.182	0.198	0.198	0.1992	0.1416	0.0135	0.1323	-0.0063	-0.0086	-0.0146
chr4:47254796-47290192 (+) // 95.25 // p12	ATPase, class V, type 10D	ATP10D	213238_at	0.1384	0.115	0.1314	0.1882	0.1702	0.2746	0.0721	0.2047	0.2093	0.2434	0.2451	0.2336	0.173	0.135	0.1018	0.1381	0.173369	0.0696	0.1232	0.1956	0.153	0.1493	0.153	0.2163	0.1021	0.249	-0.0865	-0.0888	-0.0891
chr6:35649344-35651470 (-) // 95.44 // p21.31	FK506 binding protein 5	FKBP5	224856_at	0.2627	0.248	0.1615	0.2175	0.2575	0.1293	0.0135	0.1945	0.2113	0.2252	0.2466	0.2085	0.1468	0.0099	0.0269	0.214	0.173356	0.2056	0.2717	0.3248	0.3113	0.3142	0.3144	0.3262	0.1438	0.3508	-0.0664	-0.0667	-0.0972
chrX:152425520-152428198 (+) // 84.09 // q28	biglycan	BGN	213905_x_at	0.1321	0.1226	0.146	0.2014	0.1956	0.19	-0.005	0.3014	0.2852	0.306	0.2252	0.3228	0.2048	0.0086	0.0052	0.1314	0.173331	0.1165	0.1262	0.1988	0.1284	0.1307	0.1316	0.0909	-0.0188	0.0937	0.157	0.1514	0.1937
chr5:135543860-135546320 (+) // 98.48 // q31.2	SMAD family member 5	SMAD5	225223_at	0.1577	0.2564	0.1398	0.2287	0.0111	0.2334	0.0294	0.2087	0.249	0.2414	0.2376	0.2446	0.1165	0.1323	0.0112	0.2752	0.173313	0.1016	0.1327	0.268	0.1297	0.1288	0.1305	0.1287	0.1098	0.1321	-0.0427	-0.0484	-0.0191
chr21:46366837-46374142 (+) // 91.15 // q22.3	collagen, type VI, alpha 2	COL6A2	213290_at	0.1126	0.1431	0.1215	0.1064	0.1101	0.2113	0.0605	0.3652	0.2843	0.2925	0.2416	0.2956	0.2025	-0.0166	0.0196	0.2206	0.173175	0.0663	0.0777	0.181	0.068	0.0718	0.0735	0.0303	-0.0458	0.0378	0.0397	0.0376	0.046
chr13:43905660-44047255 (-) // 98.11 // q14.11	TSC22 domain family, member 1	TSC22D1	215111_s_at	0.1772	0.1525	0.1922	0.2391	0.1575	0.1041	-0.1021	0.2287	0.203	0.2373	0.2153	0.2303	0.1055	0.2662	0.2227	0.1393	0.17305	0.1248	0.1686	0.2199	0.1626	0.1654	0.1672	0.1628	-0.0348	0.1789	0.1059	0.0942	0.1376
chr4:38622777-38623755 (+) // 83.94 // p14	family with sequence similarity 114, member A1	FAM114A1	213455_at	0.1609	0.2109	0.1429	0.1444	0.1188	0.2684	0.0439	0.2399	0.2122	0.248	0.1775	0.25	0.1348	0.1431	0.1236	0.1481	0.172962	0.0222	0.0504	0.1564	0.0833	0.0826	0.0865	-0.0166	-0.0855	-0.0033	0.1746	0.1573	0.199
chr5:73217483-73273573 (+) // 99.22 // q13.2	Rho-guanine nucleotide exchange factor	RGNEF	219610_at	0.1743	0.1852	0.1861	0.2277	0.196	0.16	0.052	0.1909	0.1938	0.194	0.1855	0.197	0.1895	0.1835	0.1578	0.0931	0.1729	0.1297	0.1342	0.1767	0.1141	0.1185	0.1205	0.1141	-0.0206	0.1289	0.072	0.0709	0.0757
chr9:33614222-33615520 (+) // 85.76 // p13.3 /// chr15:58427059-58477471 (-) // 82.54 // q22.2	annexin A2 pseudogene 2	ANXA2P2	208816_x_at	0.1317	0.1748	0.0939	0.1558	0.1411	0.3143	0.1079	0.1414	0.1395	0.1416	0.129	0.1404	0.1664	0.3471	0.3021	0.1371	0.172756	0.0474	0.0603	0.1467	0.0875	0.0899	0.0928	0.0345	-0.0508	0.0503	0.1388	0.1312	0.1362
chr17:37808733-37828790 (-) // 55.02 // q21.31	polymerase I and transcript release factor	PTRF	1557938_s_at	0.1461	0.2152	0.085	0.1455	0.2338	0.2823	0.0817	0.2622	0.238	0.2065	0.2152	0.2102	0.2224	-0.0202	-0.0044	0.2439	0.172712	0.0693	0.076	0.1865	0.0927	0.0966	0.0991	0.0362	-0.032	0.0593	-0.0711	-0.0646	-0.1023
chr2:36436900-36631781 (+) // 96.88 // p22.2	cysteine rich transmembrane BMP regulator 1 (chordin-like)	CRIM1	202551_s_at	0.1303	0.1647	0.1194	0.2036	0.2281	0.2464	0.1118	0.2639	0.23	0.2067	0.2027	0.2143	0.2304	0.0286	0.0135	0.1677	0.172631	0.109	0.1465	0.2275	0.1663	0.1668	0.168	0.1035	0.0045	0.1143	-0.0516	-0.044	-0.0452
chr18:40542260-40542711 (+) // 69.57 // q12.3	MRNA; cDNA DKFZp686G24244 (from clone DKFZp686G24244)	---	242901_at	0.2015	0.1854	0.1638	0.2544	0.1923	0.0605	0.0324	0.2944	0.2569	0.2701	0.2106	0.2831	0.1575	0.0002	0.021	0.1769	0.172563	0.2804	0.2641	0.2828	0.1464	0.1479	0.148	0.2437	0.0631	0.2301	-0.0145	-0.0038	0.0029
chr11:74823332-74830487 (-) // 91.28 // q13.4	glycerophosphodiester phosphodiesterase domain containing 5	GDPD5	213343_s_at	0.1897	0.2711	0.16	0.2074	0.1879	0.1051	-0.0582	0.2237	0.2725	0.2326	0.2408	0.2309	0.1346	-0.0045	-0.0132	0.3792	0.172475	0.2237	0.2129	0.3342	0.1565	0.1615	0.1609	0.2115	0.0352	0.1989	-0.0724	-0.067	-0.0845
chr2:38148249-38156796 (-) // 99.4 // p22.2	cytochrome P450, family 1, subfamily B, polypeptide 1	CYP1B1	202437_s_at	0.2223	0.2288	0.1464	0.2579	0.176	0.194	0.0322	0.2206	0.2391	0.2281	0.234	0.2304	0.1657	0.0094	-0.0061	0.18	0.172425	0.2165	0.2339	0.2693	0.2196	0.2248	0.2255	0.1722	0.0511	0.1896	-0.0062	-0.0026	-0.0162
chr16:63576100-63576469 (-) // 66.49 // q21	Transcribed locus	---	241780_at	0.1635	0.1677	0.1606	0.2079	0.1501	0.2638	0.1229	0.2407	0.2205	0.2378	0.2217	0.2367	0.1893	0.0224	0.0168	0.1352	0.17235	0.0781	0.1422	0.1914	0.197	0.1956	0.197	0.1507	0.0425	0.1682	0.0051	0.0019	0.0135
chr3:71100211-71102573 (-) // 91.65 // p14.1	forkhead box P1	FOXP1	1558996_at	0.2051	0.1581	0.1663	0.2193	0.2193	0.0793	-0.099	0.2753	0.2815	0.2982	0.261	0.2933	0.1577	0.0287	0.0415	0.1714	0.172313	0.2875	0.2903	0.308	0.229	0.23	0.2301	0.3187	0.3126	0.3247	0.0108	0.0119	0.0141
chr1:12338671-12494686 (+) // 97.21 // p36.22	vacuolar protein sorting 13 homolog D (S. cerevisiae)	VPS13D	212323_s_at	0.2311	0.2149	0.2015	0.2134	0.1561	0.0584	-0.0581	0.2286	0.2019	0.235	0.2184	0.2281	0.0968	0.1693	0.1845	0.1752	0.172194	0.1954	0.3286	0.356	0.3362	0.3314	0.3282	0.2235	0.0974	0.1939	0.0672	0.0578	0.0992
chr17:58121073-58124383 (+) // 97.47 // q23.2	mannose receptor, C type 2	MRC2	209280_at	0.1666	0.166	0.14	0.1872	0.2765	0.1031	0.3463	0.2625	0.2249	0.2074	0.183	0.22	0.1549	-0.0425	0.0202	0.1355	0.171975	0.1183	0.1205	0.1783	0.1056	0.1101	0.1112	0.0961	-0.0237	0.1057	-0.0075	0.0068	0.0141
chr7:113842609-114073121 (+) // 89.12 // q31.1	forkhead box P2	FOXP2	1555352_at	0.1255	0.1189	0.0934	0.147	0.0905	0.0872	0.0273	0.2671	0.3057	0.2967	0.3251	0.2961	0.2504	0.1131	0.1052	0.1019	0.171944	0.0391	0.0649	0.0925	0.0468	0.045	0.0463	0.0964	0.0126	0.088	0.016	0.0138	0.0277
chr2:191232128-191265736 (+) // 98.66 // q32.2 /// chrX:150142290-150146837 (-) // 91.99 // q28	NGFI-A binding protein 1 (EGR1 binding protein 1)	NAB1	209272_at	0.1623	0.2053	0.1486	0.2409	0.1147	0.1012	-0.0556	0.1797	0.2355	0.2309	0.2171	0.2276	0.0984	0.236	0.1681	0.2389	0.17185	0.1342	0.1623	0.2835	0.1575	0.1589	0.159	0.1753	0.1266	0.195	0.0209	0.0204	0.0542
chr2:206369351-206371102 (+) // 89.72 // q33.3	neuropilin 2	NRP2	225566_at	0.1346	0.1189	0.1025	0.1477	0.1356	0.2303	0.0612	0.2996	0.2721	0.2984	0.2641	0.3008	0.231	0.0079	-0.0001	0.1445	0.171819	0.0935	0.1303	0.1825	0.1467	0.1466	0.1485	0.1029	-0.0091	0.1042	-0.0141	-0.0139	-0.0139
chr2:62692510-62694344 (-) // 54.27 // p15	CDNA clone IMAGE:5271366	---	1556775_at	0.2014	0.2033	0.1551	0.2134	0.2219	0.1371	0.0332	0.2252	0.2214	0.2095	0.2461	0.2031	0.1797	0.0345	0.0988	0.1651	0.1718	0.1805	0.2158	0.2422	0.1809	0.1855	0.1858	0.2507	0.0617	0.2502	-0.0619	-0.0447	-0.0708
chr3:33130570-33160003 (+) // 79.89 // p22.3	cartilage associated protein	CRTAP	201380_at	0.1755	0.281	0.1599	0.1831	0.0975	0.2653	0.02	0.2117	0.229	0.2174	0.2304	0.2054	0.1659	-0.0046	-0.035	0.3457	0.171763	0.0706	0.1066	0.2612	0.162	0.1632	0.1634	0.0937	0.0529	0.1061	-0.0933	-0.0936	-0.1148
chr3:61522282-61732393 (+) // 87.22 // p14.2	protein tyrosine phosphatase, receptor type, G	PTPRG	1569323_at	0.2067	0.1791	0.1187	0.1955	0.1531	0.1061	-0.0793	0.3069	0.258	0.3164	0.2369	0.3059	0.1472	0.0291	0.0222	0.245	0.171719	0.3527	0.2873	0.309	0.2022	0.2066	0.2073	0.1956	0.0337	0.228	0.0569	0.057	0.0749
chr16:69657884-69822096 (-) // 96.56 // q22.2	hydrocephalus inducing homolog (mouse) /// hydrocephalus inducing homolog 2 (mouse)	HYDIN /// HYDIN2	1554907_a_at	0.2058	0.1807	0.1095	0.2446	0.1738	0.1364	0.0988	0.2268	0.268	0.2462	0.2842	0.2576	0.2204	0.0106	-0.0134	0.0964	0.17165	0.2304	0.2562	0.2428	0.181	0.1822	0.1827	0.2558	0.0947	0.2519	-0.0384	-0.0266	-0.035
chr4:152339637-152340021 (-) // 95.76 // q31.3	Transcribed locus	---	237157_at	0.1562	0.1423	0.0664	0.1426	0.0504	0.0199	-0.1535	0.2966	0.2546	0.3271	0.2192	0.3206	0.1044	0.2905	0.2418	0.2628	0.171369	0.1505	0.1701	0.2821	0.1014	0.1048	0.106	0.167	-0.0084	0.158	0.0941	0.0833	0.1393
chr6:1552088-1552588 (+) // 98.04 // p25.3	Transcribed locus	---	241787_at	0.1709	0.1648	0.2634	0.3084	0.2638	0.0863	0.1125	0.198	0.2311	0.1728	0.198	0.1828	0.2315	0.0147	0.0576	0.0851	0.171356	0.2655	0.2341	0.2125	0.1539	0.168	0.166	0.155	-0.0315	0.1639	-0.0244	0.0117	-0.047
chr10:66255285-66256640 (+) // 90.75 // q21.3 /// chr9:33614222-33615352 (+) // 81.42 // p13.3 /// chr15:58426827-58477471 (-) // 100.0 // q22.2 /// chr4:154448070-154449413 (-) // 91.85 // q31.3	annexin A2	ANXA2	201590_x_at	0.1315	0.1658	0.0951	0.1555	0.1389	0.3037	0.1	0.14	0.1365	0.1441	0.1218	0.143	0.1599	0.3583	0.3195	0.1272	0.1713	0.0395	0.0539	0.1388	0.0932	0.0945	0.0976	0.0339	-0.0527	0.0485	0.1699	0.155	0.1695
chr12:63958788-64143435 (+) // 94.28 // q14.3	methionine sulfoxide reductase B3	MSRB3	1554126_at	0.1822	0.2132	0.0991	0.1299	0.1895	0.1671	0.0838	0.3422	0.2539	0.2174	0.2094	0.2232	0.288	-0.0543	0.0195	0.1731	0.171075	0.1118	0.1147	0.1244	0.1068	0.1153	0.1154	0.044	-0.0606	0.0642	-0.0739	-0.0426	-0.1047
chr12:25998377-26001766 (-) // 51.13 // p12.1	Homo sapiens, clone IMAGE:3632683, mRNA	---	235161_at	0.2499	0.244	0.1797	0.2088	0.2802	0.1637	0.0948	0.2067	0.1974	0.1923	0.1898	0.1832	0.1991	-0.0397	0.0256	0.1577	0.170825	0.1613	0.1688	0.1667	0.1623	0.1678	0.1678	0.1618	-0.0241	0.191	-0.0386	-0.0072	-0.0362
chr21:16085691-16113035 (+) // 47.37 // q21.1 /// chr21:35153640-35343066 (-) // 48.15 // q22.12	ubiquitin specific peptidase 25	USP25	1555559_s_at	0.2199	0.1715	0.2475	0.2171	0.3196	0.1795	0.1373	0.1594	0.1382	0.1477	0.1909	0.1204	0.2365	0.0283	0.0762	0.143	0.170813	0.0539	0.2211	0.2268	0.3888	0.3847	0.3845	0.2399	0.1349	0.2651	-0.0828	-0.0846	-0.1057
chr9:18464166-18674955 (+) // 98.68 // p22.2	ADAMTS-like 1	ADAMTSL1	1552457_a_at	0.1856	0.1902	0.1279	0.1683	0.2306	0.4338	0.1557	0.1893	0.1725	0.1869	0.2051	0.1805	0.1692	0.0079	0.0067	0.1223	0.170781	0.105	0.137	0.1673	0.1225	0.1214	0.1228	0.1619	0.0498	0.1513	-0.06	-0.0565	-0.0643
chr15:58426827-58477466 (-) // 98.16 // q22.2	annexin A2	ANXA2	210427_x_at	0.1317	0.1685	0.0938	0.1549	0.137	0.3029	0.0995	0.1392	0.137	0.1423	0.1204	0.1419	0.1582	0.355	0.3176	0.129	0.170556	0.0405	0.0534	0.1387	0.0918	0.0933	0.0965	0.0331	-0.0513	0.048	0.1687	0.1539	0.1663
chr3:100840144-100881996 (+) // 77.19 // q12.1	collagen, type VIII, alpha 1	COL8A1	221152_at	0.2214	0.2073	0.1848	0.2379	0.1908	0.1477	0.121	0.2271	0.1978	0.205	0.1981	0.1957	0.2439	0.0019	0.0251	0.1166	0.170131	0.1832	0.328	0.2736	0.3923	0.3848	0.3765	0.2355	0.1547	0.2764	-0.0169	-0.0034	-0.0085
chr19:45799137-45827368 (+) // 92.5 // q13.2	latent transforming growth factor beta binding protein 4	LTBP4	210628_x_at	0.1374	0.1481	0.1238	0.1556	0.1727	0.1022	0.248	0.257	0.2273	0.1864	0.1852	0.1884	0.1487	0.1289	0.1628	0.1485	0.170062	0.0888	0.1006	0.1534	0.0901	0.0941	0.0943	0.0915	0.0334	0.0939	-0.0057	0.0001	-0.0366
chr5:140714790-140719606 (+) // 87.82 // q31.3	protocadherin gamma subfamily A, 4	PCDHGA4	1552735_at	0.214	0.1675	0.1287	0.2256	0.1555	0.1484	-0.0266	0.2493	0.2227	0.3019	0.2313	0.291	0.1358	0.0369	0.024	0.2127	0.169919	0.0925	0.1141	0.2112	0.1157	0.1147	0.1156	0.2253	0.0422	0.2211	0.0615	0.0596	0.091
chr6:136536625-136558407 (+) // 82.8 // q23.3	phosphodiesterase 7B	PDE7B	230109_at	0.1408	0.1656	0.1725	0.1985	0.1769	0.1215	-0.0263	0.3112	0.288	0.3041	0.2447	0.3018	0.1759	-0.0347	-0.0225	0.1989	0.169806	0.0848	0.1264	0.1973	0.119	0.1199	0.1218	0.1165	0.0002	0.1288	-0.0896	-0.082	-0.0865
chrX:64052986-64113061 (-) // 98.4 // q11.1	KIAA1166	KIAA1166	220040_x_at	0.214	0.1937	0.1935	0.2389	0.2431	0.2393	0.0403	0.2068	0.1963	0.2045	0.2324	0.1997	0.1874	-0.0595	-0.0384	0.2228	0.169675	0.1785	0.2185	0.2295	0.2002	0.2029	0.204	0.2614	0.0303	0.2256	-0.1386	-0.1309	-0.157
chr6:32116911-32123540 (-) // 99.81 // p21.32 /// chr6_cox_hap1:3416090-3422720 (-) // 99.85 // /// chr6_qbl_hap2:3223933-3230563 (-) // 99.85 //	tenascin XA pseudogene /// tenascin XB	TNXA /// TNXB	216333_x_at	0.1502	0.1923	0.1194	0.15	0.1108	0.0149	-0.0638	0.3353	0.2875	0.3016	0.2375	0.3038	0.1637	0.0142	0.0474	0.343	0.169238	0.1921	0.1685	0.3098	0.112	0.122	0.1217	0.0959	-0.0096	0.0919	-0.035	-0.0264	-0.0221
chr16:73044216-73198511 (-) // 98.0 // q22.3	golgi apparatus protein 1	GLG1	207966_s_at	0.1691	0.1152	0.2056	0.2088	0.2545	0.1045	-0.0039	0.2932	0.2348	0.2336	0.2031	0.2488	0.2169	-0.0025	0.0754	0.15	0.169194	0.1544	0.19	0.2265	0.1746	0.1792	0.1788	0.3659	0.0585	0.2448	-0.0585	-0.0608	-0.0672
chr7:134114915-134305231 (+) // 94.06 // q33	caldesmon 1	CALD1	201615_x_at	0.1215	0.1298	0.1836	0.1507	0.1841	0.2498	0.1701	0.335	0.2121	0.2168	0.1893	0.2201	0.2062	-0.0269	0.0269	0.1346	0.168981	0.0259	0.0946	0.1557	0.1536	0.1524	0.1542	0.0701	-0.0043	0.066	-0.0625	-0.0582	-0.0573
chr11:12355678-12508919 (+) // 93.38 // p15.3	parvin, alpha	PARVA	222455_s_at	0.1709	0.2814	0.0984	0.1188	0.0865	0.2189	0.0637	0.2262	0.2402	0.2333	0.2066	0.2286	0.1171	0.0828	0.0338	0.2963	0.168969	0.0273	0.0657	0.2216	0.0955	0.0952	0.0969	0.0439	-0.0333	0.051	0.0225	0.0089	0.0471
chr5:154205559-154206983 (-) // 29.27 // q33.2	CDNA clone IMAGE:4297077	---	1564699_at	0.2183	0.1806	0.1331	0.1939	0.1305	0.0982	-0.04	0.2915	0.2281	0.2914	0.236	0.2772	0.1512	0.0036	0.029	0.2799	0.168906	0.2227	0.248	0.2971	0.1959	0.1967	0.1998	0.2222	0.0465	0.211	-0.0269	-0.0241	-0.019
chr12:10742955-10767220 (-) // 90.13 // p13.2 /// chr16:31486622-31488537 (-) // 89.24 // p11.2	cold shock domain protein A	CSDA	201160_s_at	0.264	0.3255	0.1638	0.2201	0.1587	0.1463	0.073	0.1347	0.1401	0.153	0.1518	0.1501	0.1125	0.1989	0.1799	0.1292	0.16885	0.099	0.1076	0.1737	0.1199	0.121	0.1214	0.1569	0.0313	0.1602	-0.0407	-0.0338	-0.0364
chr6:94006463-94007194 (-) // 97.85 // q16.1	Transcribed locus	---	229288_at	0.2099	0.1963	0.2217	0.2677	0.2376	0.1592	0.0058	0.1773	0.1643	0.1933	0.1755	0.1855	0.1216	0.0195	0.0349	0.3313	0.168838	0.0708	0.1051	0.2018	0.169	0.1658	0.1695	0.2054	0.0439	0.1736	-0.0304	-0.032	-0.021
chr1:226611365-226611824 (-) // 69.61 // q42.13	Transcribed locus	---	222324_at	0.2097	0.1628	0.116	0.207	0.1462	0.1329	-0.0284	0.2377	0.2755	0.2528	0.2954	0.2641	0.1895	0.072	0.0679	0.0984	0.168719	0.1981	0.2506	0.1901	0.0992	0.1046	0.1028	0.1964	0.0229	0.21	0.1061	0.1179	0.1191
chr3:33130547-33159092 (+) // 85.72 // p22.3	cartilage associated protein	CRTAP	1554464_a_at	0.1731	0.2031	0.1361	0.1525	0.1571	0.3351	0.0951	0.2138	0.1724	0.1955	0.2193	0.1733	0.2128	0.0017	0.0002	0.2577	0.168675	0.0075	0.0893	0.1878	0.1979	0.1957	0.197	0.0638	-0.0377	0.0691	-0.0911	-0.094	-0.1264
chr5:66497191-66498848 (+) // 96.62 // q12.3	microtubule associated serine/threonine kinase family member 4 /// hypothetical protein LOC100128443	LOC100128443 /// MAST4	210958_s_at	0.1487	0.1378	0.18	0.2106	0.1566	0.0454	-0.0514	0.2334	0.2252	0.2285	0.1861	0.2308	0.1318	0.222	0.2514	0.1593	0.168512	0.1526	0.1274	0.2004	0.0768	0.0821	0.0825	0.1604	-0.0223	0.1626	0.1212	0.1242	0.1382
chr2:55946601-56003682 (-) // 98.29 // p16.1	EGF-containing fibulin-like extracellular matrix protein 1	EFEMP1	201843_s_at	0.1511	0.1737	0.1399	0.2099	0.2532	0.152	0.0152	0.2361	0.2298	0.2199	0.2249	0.2187	0.2232	0.0175	-0.0033	0.2334	0.16845	0.114	0.139	0.2536	0.1647	0.1653	0.1671	0.1477	0.0261	0.155	-0.0608	-0.0585	-0.0637
chr22:38075929-38103861 (+) // 92.25 // q13.1	synaptogyrin 1	SYNGR1	210613_s_at	0.1926	0.1879	0.2134	0.2483	0.2055	0.2276	0.1073	0.1997	0.2061	0.2093	0.2532	0.2022	0.1777	-0.0436	-0.0027	0.1104	0.168431	0.103	0.1513	0.1934	0.1556	0.1542	0.1561	0.2264	0.055	0.2122	-0.0999	-0.0977	-0.1135
chr1:166024044-166026684 (+) // 89.26 // q24.2	myelin protein zero-like 1	MPZL1	201874_at	0.1367	0.1532	0.1445	0.2327	0.1409	0.2453	0.0803	0.1643	0.173	0.1689	0.1765	0.1668	0.1505	0.2188	0.2288	0.1099	0.168194	0.0543	0.0852	0.1409	0.1607	0.1618	0.1633	0.056	-0.0003	0.0893	0.1925	0.1776	0.1479
chr22:29333281-29353047 (+) // 99.52 // q12.2	transcobalamin II; macrocytic anemia	TCN2	204043_at	0.1916	0.1492	0.1832	0.2068	0.2693	0.0781	0.0554	0.2327	0.2045	0.2304	0.2133	0.216	0.1697	0.0529	0.0774	0.1598	0.168144	0.1199	0.1918	0.2289	0.2017	0.2063	0.2078	0.2139	0.0265	0.2035	0.04	0.0355	0.041
chr11:17066643-17147864 (-) // 98.96 // p15.1	phosphoinositide-3-kinase, class 2, alpha polypeptide	PIK3C2A	226094_at	0.1925	0.1373	0.1132	0.1959	0.1719	0.2296	-0.0746	0.222	0.1731	0.2481	0.2464	0.2294	0.174	0.1201	0.114	0.1956	0.168031	0.0887	0.1798	0.2306	0.2324	0.2268	0.2317	0.1983	-0.0292	0.217	0.0023	-0.0138	-0.0151
chrX:152413646-152428198 (+) // 94.75 // q28	biglycan	BGN	201261_x_at	0.1258	0.1162	0.1395	0.1905	0.1855	0.1893	0.0289	0.2937	0.2701	0.2977	0.2081	0.3158	0.1978	0.0014	0.0047	0.1195	0.167781	0.0982	0.111	0.1798	0.1127	0.1143	0.1154	0.0817	-0.0198	0.0797	0.1508	0.1474	0.1944
chr5:175752062-175776115 (-) // 93.52 // q35.2	clathrin, light chain (Lcb)	CLTB	211043_s_at	0.1332	0.1323	0.1304	0.2092	0.1853	0.1917	0.1039	0.0878	0.1279	0.0914	0.1181	0.1004	0.0859	0.4491	0.4338	0.1031	0.167719	0.1446	0.1521	0.1623	0.1088	0.1105	0.1122	0.1224	-0.0218	0.1238	0.0072	0.0143	-0.021
chr1:206325053-206327404 (-) // 75.7 // q32.2	CDNA FLJ12996 fis, clone NT2RP3000235	---	222159_at	0.2136	0.1611	0.077	0.1979	0.1807	0.0229	0.0137	0.2498	0.2244	0.2485	0.173	0.2606	0.1498	0.1883	0.2225	0.099	0.167675	0.2807	0.2279	0.2521	0.1402	0.1474	0.1468	0.1669	-0.007	0.1669	0.1193	0.1371	0.1457
chr9:33614634-33615352 (+) // 66.82 // p13.3 /// chr15:58426824-58436727 (-) // 89.95 // q22.2	annexin A2	ANXA2	213503_x_at	0.1318	0.171	0.0941	0.1505	0.1338	0.2954	0.0978	0.1344	0.1318	0.1404	0.1147	0.1388	0.1519	0.3484	0.3103	0.1372	0.167644	0.0365	0.0513	0.1396	0.0888	0.0899	0.093	0.032	-0.0535	0.0454	0.1628	0.1484	0.1657
chr4:7811340-7924705 (-) // 98.78 // p16.1	actin filament associated protein 1	AFAP1	203563_at	0.1564	0.2056	0.1351	0.2078	0.1865	0.3101	0.079	0.1671	0.2017	0.1939	0.2122	0.19	0.1464	0.1054	0.0263	0.1566	0.167506	0.0826	0.0998	0.1808	0.1197	0.1183	0.1201	0.1234	0.0414	0.1117	-0.0495	-0.046	-0.0485
chr12:93939801-93991339 (-) // 99.82 // q22	nuclear receptor subfamily 2, group C, member 1	NR2C1	204791_at	0.2239	0.254	0.1739	0.1908	0.1188	0.2164	-0.0908	0.205	0.2044	0.2555	0.2453	0.2313	0.0913	0.0665	0.014	0.2781	0.1674	0.1072	0.2049	0.3103	0.2716	0.2634	0.2654	0.2243	0.1181	0.2191	-0.0809	-0.1006	-0.0654
chr20:43895880-43905321 (+) // 71.41 // q13.12	sorting nexin family member 21	SNX21	1553961_s_at	0.2287	0.3472	0.1155	0.1372	0.0771	0.1751	0.0062	0.2298	0.2433	0.2329	0.1984	0.2261	0.1153	-0.0042	0.002	0.3445	0.167194	0.1068	0.097	0.2339	0.0714	0.0761	0.0769	0.0506	0.0216	0.0675	-0.0631	-0.048	-0.0576
chr8:91703403-91706592 (-) // 98.01 // q21.3	transmembrane protein 64	TMEM64	225974_at	0.1972	0.2239	0.1382	0.2264	0.1585	0.2156	0.0185	0.1797	0.2024	0.2242	0.255	0.2109	0.1508	0.0553	0.0004	0.2172	0.167137	0.1006	0.1584	0.2599	0.2036	0.2033	0.2047	0.1823	0.0693	0.198	-0.0575	-0.0611	-0.0579
chr4:144613438-144614104 (+) // 96.25 // q31.21	CDNA clone IMAGE:4801326	---	229114_at	0.1449	0.1485	0.1538	0.213	0.14	0.1016	-0.0532	0.2345	0.2836	0.2625	0.2693	0.2674	0.1529	0.0928	0.0533	0.2078	0.167044	0.1907	0.228	0.2892	0.2002	0.1987	0.2003	0.301	0.0896	0.2654	-0.0711	-0.075	-0.071
chr7:134270514-134271211 (+) // 99.14 // q33	caldesmon 1	CALD1	243084_at	0.1217	0.1199	0.1089	0.1868	0.1534	0.2044	0.0867	0.3223	0.2441	0.2836	0.2201	0.2886	0.2173	-0.019	0.0074	0.1264	0.167038	0.1152	0.174	0.2018	0.1871	0.1846	0.1882	0.1023	-0.0079	0.1027	-0.0221	-0.022	-0.0229
chr1:168964205-168964777 (+) // 98.28 // q24.2	Transcribed locus	---	238852_at	0.1831	0.225	0.1202	0.1691	0.0782	0.2336	0.036	0.2605	0.2629	0.2689	0.2499	0.2619	0.1515	-0.0238	-0.0421	0.2324	0.166706	0.1084	0.163	0.2454	0.1957	0.1986	0.1972	0.0823	0.0046	0.082	-0.0241	-0.0282	-0.0126
chr1:12338671-12494686 (+) // 97.21 // p36.22	vacuolar protein sorting 13 homolog D (S. cerevisiae)	VPS13D	212324_s_at	0.2386	0.2106	0.178	0.2001	0.1852	0.1463	-0.0209	0.1689	0.1507	0.1792	0.1993	0.1572	0.0934	0.1959	0.2238	0.1599	0.166638	0.1253	0.2977	0.3147	0.3939	0.3848	0.3824	0.1838	-0.003	0.1593	0.0602	0.0401	0.0328
chr10:13775708-14090538 (-) // 96.68 // p13	FERM domain containing 4A	FRMD4A	208475_at	0.1854	0.1709	0.1696	0.2548	0.1477	0.1191	-0.0221	0.2469	0.2397	0.2914	0.1962	0.3027	0.1163	0.0116	-0.0042	0.24	0.166625	0.1536	0.1448	0.2784	0.0858	0.0868	0.088	0.2177	0.0177	0.18	-0.0035	-0.0049	0.0321
chr8:48812027-48813275 (-) // 94.47 // q11.21	CCAAT/enhancer binding protein (C/EBP), delta	CEBPD	203973_s_at	0.1578	0.1297	0.2148	0.2413	0.191	0.0889	-0.0376	0.2379	0.2285	0.2289	0.2163	0.2292	0.1407	0.106	0.1362	0.1556	0.166575	0.2205	0.2341	0.2968	0.2056	0.2145	0.2159	0.2281	0.0523	0.2346	0.0665	0.0695	0.0682
chr15:71131927-71382835 (+) // 97.7 // q24.1	neogenin homolog 1 (chicken)	NEO1	204321_at	0.1656	0.1597	0.1288	0.2067	0.1279	0.1889	-0.0188	0.1547	0.1777	0.1685	0.1778	0.1705	0.1261	0.308	0.2777	0.1453	0.166569	0.1111	0.1238	0.1517	0.1298	0.1316	0.1343	0.1665	0.0168	0.169	0.1509	0.1324	0.1514
chr11:6296753-6298324 (-) // 95.95 // p15.4	protein kinase C, delta binding protein	PRKCDBP	213010_at	0.1267	0.1634	0.1108	0.1583	0.1624	0.3049	0.0935	0.2413	0.2264	0.2269	0.2226	0.2295	0.1884	0.0301	0.0165	0.1625	0.166513	0.0425	0.0606	0.1503	0.068	0.0686	0.0717	0.0758	-0.022	0.0755	-0.0432	-0.0386	-0.036
chr20:43902836-43904927 (+) // 85.52 // q13.12	sorting nexin family member 21	SNX21	226595_at	0.2007	0.2835	0.1	0.1509	0.173	0.1489	0.1021	0.219	0.2292	0.1914	0.1935	0.1945	0.1488	0.0061	0.0389	0.2836	0.166506	0.133	0.1086	0.2061	0.0549	0.0613	0.0615	0.0457	-0.0818	0.0579	-0.0441	-0.029	-0.0601
chr12:21845244-21980875 (-) // 99.76 // p12.1	ATP-binding cassette, sub-family C (CFTR/MRP), member 9	ABCC9	208562_s_at	0.2218	0.2254	0.157	0.1809	0.2198	0.1251	0.1011	0.2132	0.1818	0.2084	0.1745	0.1892	0.146	-0.0083	0.0325	0.2951	0.166469	0.0844	0.2172	0.3032	0.3293	0.3268	0.3285	0.1315	0.0339	0.12	-0.057	-0.0497	-0.063
chr8:90983268-91009271 (+) // 96.62 // q21.3	oxidative stress induced growth inhibitor family member 2	OSGIN2	204024_at	0.2047	0.2564	0.1635	0.2442	0.2244	0.1496	-0.0897	0.2123	0.2327	0.217	0.2297	0.2124	0.199	-0.043	-0.0734	0.3234	0.16645	0.1571	0.1905	0.3228	0.24	0.2423	0.2422	0.2417	0.0876	0.2489	-0.1259	-0.1209	-0.1383
chr5:108556889-108558936 (+) // 98.29 // q21.3	CDNA FLJ35001 fis, clone OCBBF2011887	---	232064_at	0.1856	0.1566	0.2233	0.2275	0.2227	0.2425	0.0331	0.2136	0.17	0.1952	0.1804	0.1863	0.1776	0.0126	0.0344	0.2016	0.166437	0.0631	0.1577	0.2319	0.2549	0.2505	0.2529	0.1987	0.0184	0.1782	-0.1045	-0.1092	-0.107
chr5:39408502-39460703 (-) // 98.99 // p13.1	disabled homolog 2, mitogen-responsive phosphoprotein (Drosophila)	DAB2	201280_s_at	0.1183	0.1054	0.0986	0.1993	0.1986	0.1494	-0.0051	0.3058	0.2603	0.3032	0.2281	0.3189	0.2188	-0.0058	-0.0203	0.1892	0.166419	0.1276	0.1392	0.2439	0.1474	0.15	0.1515	0.133	-0.0026	0.1267	-0.0009	0.0013	0.0214
chr2:158301206-158403036 (-) // 95.8 // q24.1	activin A receptor, type I	ACVR1	203935_at	0.1607	0.1815	0.142	0.1809	0.1534	0.2337	0.0447	0.2242	0.2137	0.2344	0.2135	0.2279	0.171	0.0719	0.0358	0.1729	0.166387	0.0365	0.0947	0.1736	0.14	0.1393	0.142	0.0864	-0.0071	0.0899	0.0344	0.0265	0.0468
chr1:201976268-201979832 (+) // 97.74 // q32.1	ATPase, Ca++ transporting, plasma membrane 4	ATP2B4	212135_s_at	0.125	0.1232	0.057	0.1133	0.1102	0.1028	-0.0552	0.4061	0.3276	0.3428	0.2881	0.3449	0.1985	-0.0255	0.0046	0.1971	0.166281	0.0764	0.0821	0.1823	0.0852	0.0897	0.0905	0.1149	0.0127	0.1159	0.038	0.0475	0.0436
chr6:86216521-86218889 (+) // 92.3 // q14.3	5'-nucleotidase, ecto (CD73)	NT5E	227486_at	0.117	0.1368	0.1238	0.1698	0.1494	0.404	0.1254	0.2601	0.2386	0.2257	0.2451	0.2313	0.1806	0.0093	-0.0154	0.0581	0.166225	0.1055	0.1149	0.1425	0.0824	0.084	0.0855	0.1352	0.1041	0.1625	-0.0835	-0.0786	-0.081
chr3:152636077-152637581 (-) // 99.6 // q25.1	immunoglobulin superfamily, member 10	IGSF10	230670_at	0.1618	0.1523	0.1853	0.1927	0.1562	0.0921	-0.0339	0.242	0.2049	0.2388	0.2093	0.22	0.2166	0.0657	0.1129	0.2421	0.166175	0.1064	0.1301	0.2399	0.1253	0.1302	0.1319	0.1926	0.0116	0.2023	0.0072	0.01	0.0042
chr11:74823371-74831276 (-) // 81.11 // q13.4	glycerophosphodiester phosphodiesterase domain containing 5	GDPD5	32502_at	0.1917	0.2779	0.1796	0.2027	0.162	0.0897	-0.074	0.2112	0.2582	0.227	0.2243	0.2261	0.1069	0.003	-0.0147	0.3846	0.166013	0.2178	0.1986	0.3299	0.1324	0.1365	0.1362	0.2091	0.0428	0.1905	-0.0747	-0.0719	-0.0788
chr16:31392024-31396781 (+) // 98.36 // p11.2	transforming growth factor beta 1 induced transcript 1	TGFB1I1	209651_at	0.0593	0.0802	0.0738	0.0814	0.1447	0.281	0.0562	0.3685	0.2975	0.2767	0.2496	0.2962	0.2523	0.0131	0.0121	0.1113	0.165869	0.0326	0.0259	0.0884	0.0247	0.0278	0.03	0.0056	-0.0416	0.0142	-0.0218	-0.0155	-0.017
chr1:150222017-150232920 (-) // 96.61 // q21.3	S100 calcium binding protein A10	S100A10	200872_at	0.0989	0.1139	0.1104	0.1648	0.1301	0.2187	0.0484	0.1295	0.1272	0.1461	0.1178	0.1406	0.1165	0.4643	0.3852	0.1399	0.165769	0.0536	0.0708	0.1444	0.0992	0.1008	0.1023	0.114	0.0062	0.1154	0.1333	0.1215	0.1433
chr10:88676666-88677706 (+) // 99.14 // q23.2	Transcribed locus	---	227273_at	0.265	0.3045	0.134	0.1747	0.045	0.1557	-0.0241	0.2118	0.1872	0.2521	0.2077	0.2389	0.0419	0.0883	0.0357	0.3339	0.165769	0.0307	0.0886	0.1839	0.1188	0.1146	0.1167	0.044	-0.0557	0.0515	0.0303	0.0151	0.0634
chr3:143359058-143359466 (-) // 92.92 // q23	glycerol kinase 5 (putative)	GK5	238121_at	0.2064	0.2057	0.1939	0.1886	0.077	0.1349	-0.1518	0.1684	0.1733	0.2231	0.2102	0.2027	0.0872	0.3189	0.2362	0.1757	0.16565	0.0934	0.1456	0.2043	0.1188	0.1208	0.121	0.2234	0.0421	0.2211	0.0953	0.0768	0.137
chr3:58153396-58171729 (-) // 95.55 // p14.3	deoxyribonuclease I-like 3	DNASE1L3	205554_s_at	0.1795	0.1583	0.2101	0.2294	0.2976	0.1211	0.0309	0.1656	0.1599	0.1805	0.1841	0.1643	0.1093	0.105	0.1121	0.2414	0.165569	0.1844	0.2843	0.3961	0.3674	0.367	0.3699	0.2922	0.0981	0.2835	-0.05	-0.0534	-0.0526
chr1:223293472-223293908 (+) // 59.23 // q42.12	Transcribed locus	---	237064_x_at	0.2002	0.1602	0.0838	0.2382	0.0923	0.1292	-0.1046	0.2547	0.2498	0.3012	0.2541	0.3101	0.1753	0.1058	0.0815	0.1155	0.165456	0.1471	0.1492	0.2046	0.1143	0.1169	0.1185	0.1927	0.0047	0.1822	0.2568	0.258	0.3174
chr20:43960805-43974193 (-) // 99.6 // q13.12	phospholipid transfer protein	PLTP	202075_s_at	0.1692	0.1695	0.136	0.1839	0.1407	0.122	-0.0519	0.263	0.2394	0.2629	0.2257	0.2633	0.1386	0.0561	0.0631	0.2656	0.165444	0.1133	0.1331	0.2257	0.1273	0.1312	0.1324	0.1339	-0.0108	0.1485	0.0639	0.0621	0.0629
chr3:196910479-196911877 (+) // 22.82 // q29	hypothetical gene supported by AK128346	LOC440993	1557293_at	0.1812	0.1684	0.2297	0.1793	0.1263	0.0624	-0.1426	0.2955	0.2	0.277	0.1994	0.2549	0.137	0.0969	0.1241	0.2574	0.165431	0.0962	0.121	0.2443	0.1402	0.1399	0.1415	0.2136	0.0909	0.2098	0.0605	0.0659	0.1012
---	MRNA; cDNA DKFZp566P2324 (from clone DKFZp566P2324)	---	1562544_at	0.1832	0.1598	0.2543	0.2489	0.2403	0.0772	-0.0922	0.2356	0.2477	0.2166	0.195	0.2313	0.2126	0.023	0.061	0.152	0.165394	0.2127	0.245	0.2611	0.1804	0.1811	0.181	0.2483	0.0615	0.2231	0.0707	0.0827	0.0961
chr17:1909893-2149731 (-) // 99.77 // p13.3	Smg-6 homolog, nonsense mediated mRNA decay factor (C. elegans)	SMG6	214940_s_at	0.1549	0.159	0.1137	0.204	0.2234	0.1972	0.0615	0.2626	0.2858	0.2135	0.2434	0.2323	0.1722	-0.0355	0.0114	0.1456	0.165313	0.1932	0.1436	0.1828	0.0617	0.0701	0.0705	0.1474	-0.0299	0.1412	-0.0341	-0.0319	-0.086
chr1:61468050-61470132 (+) // 67.35 // p31.3	CDNA FLJ12095 fis, clone HEMBB1002610	---	232997_at	0.2281	0.205	0.1574	0.2396	0.1295	0.1014	-0.0951	0.225	0.212	0.241	0.2026	0.2411	0.1533	0.0728	0.0649	0.2657	0.165269	0.2166	0.2411	0.3318	0.2347	0.2311	0.2312	0.216	0.0798	0.2011	0.0822	0.074	0.1067
chr4:140646641-140697008 (-) // 97.34 // q31.1	SET domain containing (lysine methyltransferase) 7	SETD7	224928_at	0.2552	0.3753	0.1041	0.1657	0.0804	0.1854	0.0159	0.2065	0.2054	0.2115	0.1769	0.2018	0.1082	0.042	0.024	0.2836	0.165119	0.0758	0.1195	0.2553	0.1452	0.1461	0.1486	0.0708	-0.0286	0.101	-0.0061	-0.0116	-0.01
chr4:149163847-149213373 (+) // 97.26 // q31.23	Rho GTPase activating protein 10	ARHGAP10	219431_at	0.2115	0.2413	0.1676	0.1903	0.1827	0.1736	0.1525	0.1872	0.1943	0.1911	0.2025	0.1835	0.1561	0.0016	-0.0155	0.2172	0.164844	0.134	0.1812	0.2483	0.1437	0.1453	0.1461	0.2155	0.055	0.1926	-0.1724	-0.1591	-0.1733
chr18:40535466-40898771 (+) // 98.8 // q12.3	SET binding protein 1	SETBP1	205933_at	0.1998	0.189	0.1766	0.2169	0.1	0.0939	-0.1318	0.2966	0.2859	0.312	0.2616	0.3142	0.1481	-0.0129	-0.0056	0.1918	0.164756	0.2012	0.2099	0.2822	0.1888	0.1896	0.19	0.1804	0.1005	0.1868	0.0007	-0.003	0.0101
chr17:19492682-19521495 (+) // 91.4 // p11.2	aldehyde dehydrogenase 3 family, member A2	ALDH3A2	202054_s_at	0.2297	0.2481	0.1578	0.2116	0.1424	0.0796	-0.0422	0.1551	0.162	0.1922	0.1699	0.1757	0.0793	0.2297	0.2107	0.2345	0.164756	0.1459	0.2102	0.3004	0.19	0.1919	0.1944	0.164	-0.0035	0.1719	0.0503	0.0385	0.0526
chr19:52610958-52612967 (-) // 66.11 // q13.32	Meis homeobox 3	MEIS3	1569402_at	0.1223	0.1137	0.0811	0.1357	0.1225	0.141	0.1179	0.3788	0.3014	0.2622	0.2615	0.2782	0.257	-0.0503	-0.0461	0.1575	0.16465	0.1445	0.1346	0.1218	0.0761	0.0795	0.0828	0.096	0.0324	0.1011	-0.0068	0.0086	-0.0157
chr3:189362407-189364433 (+) // 76.37 // q27.3	CDNA: FLJ21428 fis, clone COL04203	---	233824_at	0.0939	0.0589	0.1503	0.1311	0.076	0.0116	-0.1118	0.4371	0.3072	0.3511	0.2667	0.352	0.2273	0.0579	0.0948	0.1264	0.164406	0.1342	0.1303	0.1844	0.0829	0.0853	0.0863	0.1666	0.014	0.1557	0.0523	0.0601	0.094
chr7:32963582-33013064 (+) // 89.28 // p14.3 /// chr7:55716264-55748440 (-) // 78.21 // p11.2	FK506 binding protein 9, 63 kDa	FKBP9	212169_at	0.1291	0.2386	0.0834	0.137	0.0528	0.2185	0.1165	0.1946	0.2267	0.1928	0.1828	0.1951	0.0925	0.1793	0.1408	0.2497	0.164388	0.0441	0.0545	0.1795	0.0689	0.0716	0.0734	-0.0026	-0.046	0.0181	0.1049	0.0988	0.1205
chr15:80562308-80562766 (+) // 36.5 // q25.2 /// chr15:80948892-80949350 (+) // 36.5 // q25.2 /// chr15:82670235-82670693 (+) // 36.5 // q25.2 /// chr15:83559325-83559783 (+) // 36.5 // q25.3 /// chr15:82910493-82910949 (+) // 34.56 // q25.2 /// chrY:24798649-24799104 (+) // 34.77 // q11.223 /// chr15:80761217-80761675 (-) // 36.5 // q25.2 /// chr15:80463348-80463805 (-) // 36.29 // q25.2 /// chr…	---	---	217643_x_at	0.1624	0.1175	0.1084	0.1521	0.0395	0.0362	-0.0641	0.3815	0.2759	0.3749	0.2489	0.3732	0.1838	0.0335	0.0448	0.1601	0.164288	0.161	0.1453	0.2371	0.0954	0.0991	0.1005	0.1643	0.0407	0.1563	0.1043	0.1147	0.1674
chr8:59173604-59174467 (+) // 13.29 // q12.1	---	---	220898_at	0.206	0.1823	0.1614	0.2441	0.162	0.1345	-0.0556	0.2312	0.2436	0.2566	0.2396	0.2651	0.1708	0.0021	-0.0016	0.1859	0.16425	0.1712	0.1736	0.2399	0.13	0.1317	0.1329	0.2319	0.0413	0.2299	0.0251	0.0294	0.0468
chr11:129445010-129519910 (+) // 96.99 // q24.3	amyloid beta (A4) precursor-like protein 2	APLP2	208248_x_at	0.1538	0.1717	0.1602	0.2451	0.2261	0.1737	-0.0506	0.2112	0.2369	0.1722	0.2167	0.1766	0.1717	0.0814	0.0781	0.2031	0.164244	0.1973	0.188	0.2649	0.1819	0.188	0.1902	0.1868	0.0901	0.2061	0.0162	0.0159	-0.0408
chr5:54491885-54496505 (+) // 90.55 // q11.2	similar to RIKEN cDNA 2310016C16	LOC493869	227628_at	0.1471	0.2304	0.0747	0.1697	0.1578	0.3905	0.2867	0.1645	0.1872	0.1494	0.1939	0.1527	0.2126	0.0033	-0.0372	0.1445	0.164238	0.0045	0.0336	0.0999	0.0922	0.0902	0.0932	0.0131	-0.0162	0.0252	-0.0352	-0.0322	-0.0427
chr22:26704003-26716064 (-) // 91.41 // q12.1	tetratricopeptide repeat domain 28	TTC28	213058_at	0.1718	0.2136	0.1455	0.1773	0.0665	0.1539	-0.1075	0.313	0.2896	0.3218	0.2754	0.3207	0.1552	-0.0907	-0.1021	0.3217	0.164106	0.0955	0.125	0.2348	0.1124	0.1145	0.116	0.1083	-0.0417	0.1084	-0.0473	-0.0512	-0.0278
chr1:154936033-154941999 (-) // 95.87 // q23.1	cellular retinoic acid binding protein 2	CRABP2	202575_at	0.2201	0.1966	0.1303	0.1895	0.1315	0.1358	-0.0044	0.184	0.2005	0.2045	0.1883	0.2037	0.1446	0.1605	0.2069	0.1309	0.163956	0.1036	0.1224	0.1471	0.1224	0.1252	0.1258	0.1301	0.0007	0.1392	0.2979	0.2946	0.301
chr1:217430252-217430744 (+) // 62.22 // q41	Transcribed locus	---	239516_at	0.1781	0.1942	0.2496	0.1922	0.1372	0.0737	-0.1151	0.2768	0.2541	0.2786	0.2096	0.2672	0.1533	-0.0175	-0.0145	0.3039	0.163837	0.1378	0.2114	0.3116	0.2154	0.2131	0.2135	0.344	0.1074	0.2977	-0.0551	-0.0643	-0.0198
chr2:231437871-231452206 (+) // 100.0 // q37.1	integral membrane protein 2C	ITM2C	221004_s_at	0.1554	0.1143	0.157	0.1979	0.2122	0.1356	-0.0362	0.147	0.1693	0.1623	0.1927	0.1569	0.0847	0.3182	0.2738	0.1776	0.163669	0.094	0.0999	0.1461	0.1055	0.1071	0.1092	0.2618	0.0466	0.267	0.0188	0.0006	0.0185
chr17:40544543-40565411 (-) // 89.54 // q21.31	phospholipase C, delta 3	PLCD3	1552476_s_at	0.1608	0.1563	0.1182	0.1979	0.1865	0.2194	0.0656	0.1205	0.1527	0.1191	0.1528	0.1182	0.1577	0.3079	0.3029	0.0817	0.163638	0.1369	0.1339	0.1291	0.1361	0.1394	0.1399	0.1008	-0.0159	0.1167	0.0591	0.0658	-0.0101
chr2:43847227-43848630 (+) // 71.19 // p21	pleckstrin homology domain containing, family H (with MyTH4 domain) member 2	PLEKHH2	227148_at	0.1457	0.1762	0.1363	0.2127	0.0955	0.0848	-0.0907	0.2993	0.2783	0.2952	0.2542	0.2952	0.1432	0.0118	-0.0036	0.2828	0.163556	0.1715	0.1846	0.2885	0.1581	0.1596	0.1586	0.1328	0.0283	0.1285	0.0073	0.0028	0.0299
chr4:89147843-89217949 (+) // 95.06 // q22.1	polycystic kidney disease 2 (autosomal dominant)	PKD2	203688_at	0.1138	0.1589	0.1018	0.1584	0.0941	0.1947	-0.0158	0.3554	0.3223	0.3166	0.2985	0.318	0.1764	-0.1021	-0.1119	0.2362	0.163456	0.0834	0.1029	0.2222	0.1145	0.116	0.1183	0.0706	-0.0297	0.0815	-0.0677	-0.0721	-0.0706
chr17:45617636-45617829 (-) // 57.1 // q21.33	collagen, type I, alpha 1	COL1A1	1556499_s_at	0.111	0.1077	0.0599	0.1076	0.076	0.1496	-0.0525	0.3189	0.2712	0.3217	0.2026	0.3356	0.1645	0.1587	0.1371	0.1449	0.163406	0.059	0.0668	0.1616	0.0724	0.0764	0.0778	0.0299	-0.0555	0.0425	0.3164	0.307	0.3931
chr15:59085778-59086367 (-) // 83.61 // q22.2	Full length insert cDNA clone ZD19A02	---	236949_at	0.1759	0.1583	0.2054	0.1783	0.1526	0.0527	-0.0674	0.3591	0.2459	0.2547	0.2035	0.2577	0.2741	-0.0355	0.0273	0.1712	0.163362	0.1471	0.1537	0.2181	0.1278	0.1338	0.1331	0.2052	0.0291	0.1851	0.0118	0.023	0.0282
chr8:119158339-119160676 (-) // 75.94 // q24.11	CDNA: FLJ21490 fis, clone COL05464	---	215206_at	0.1356	0.1159	0.1136	0.2155	0.1622	0.0662	-0.0631	0.2562	0.235	0.2539	0.1863	0.2823	0.1794	0.1894	0.1839	0.0965	0.16305	0.2288	0.2617	0.2922	0.185	0.1886	0.1899	0.1923	0.0377	0.1594	0.1036	0.1028	0.1546
chr6:117180053-117193579 (-) // 74.24 // q22.2	chromosome 6 open reading frame 189	C6orf189	228875_at	0.2147	0.2073	0.1393	0.1899	0.1102	0.1453	-0.0175	0.2152	0.2371	0.2349	0.2523	0.2167	0.146	0.047	0.0473	0.2228	0.163031	0.1768	0.2297	0.2537	0.1448	0.152	0.1549	0.2202	0.0461	0.2381	-0.0116	-0.0084	-0.0059
chr10:111755795-111884752 (+) // 95.71 // q25.1	adducin 3 (gamma)	ADD3	201752_s_at	0.1822	0.1045	0.1721	0.2267	0.2467	0.077	-0.0678	0.2339	0.2162	0.2435	0.2291	0.2374	0.1302	0.0911	0.125	0.1606	0.163025	0.1898	0.2564	0.291	0.2917	0.2926	0.2937	0.3119	0.1028	0.2922	-0.0246	-0.0361	-0.0427
chr7:30016730-30017225 (-) // 18.95 // p15.1	Transcribed locus	---	230728_at	0.1758	0.2285	0.1295	0.1623	0.1119	0.338	0.1248	0.1779	0.1895	0.2208	0.1869	0.2107	0.1227	0.0278	-0.028	0.229	0.163006	0.0042	0.0544	0.1691	0.128	0.1227	0.1254	0.033	-0.0304	0.0331	-0.0381	-0.0495	-0.0211
chr15:46489562-46724391 (-) // 99.58 // q21.1	fibrillin 1	FBN1	202766_s_at	0.1465	0.1877	0.0742	0.1075	0.1304	0.295	0.0259	0.2741	0.2405	0.2844	0.2019	0.2801	0.1481	-0.023	-0.0221	0.2554	0.162912	0.0313	0.0537	0.1952	0.0881	0.0894	0.0921	0.03	-0.0409	0.0451	0.0509	0.0475	0.0712
chr19:50784864-50787557 (-) // 83.68 // q13.32	G protein-coupled receptor 4	GPR4	206236_at	0.1823	0.1623	0.1835	0.2199	0.2636	0.0892	0.0696	0.2103	0.2113	0.2143	0.1759	0.2137	0.1795	0.0294	0.0182	0.1817	0.162794	0.1528	0.2175	0.2699	0.204	0.206	0.2074	0.2173	0.0499	0.2141	-0.0127	-0.0107	0.0123
chr1:110404138-110414757 (-) // 96.83 // p13.3	aristaless-like homeobox 3	ALX3	207690_at	0.1863	0.1851	0.1385	0.223	0.3108	0.0817	0.2976	0.1739	0.2041	0.1655	0.1652	0.1803	0.1551	0.0133	0.0373	0.0866	0.162769	0.2262	0.2315	0.2079	0.1854	0.1857	0.1862	0.172	0.0394	0.1507	-0.0489	-0.029	-0.0526
chr13:113546912-113590396 (+) // 96.79 // q34	growth arrest-specific 6 /// similar to growth arrest-specific 6	GAS6 /// LOC100133684	202177_at	0.0947	0.1063	0.0895	0.1029	0.1307	0.3668	0.0939	0.267	0.2312	0.2339	0.2166	0.2417	0.1655	0.0895	0.0945	0.0775	0.162638	0.0867	0.0921	0.1598	0.0946	0.0943	0.0964	0.0383	-0.033	0.0498	0.0613	0.0666	0.0678
chr1:87582515-87585374 (+) // 90.36 // p22.3	LIM domain only 4	LMO4	227155_at	0.2326	0.2138	0.1578	0.2424	0.1564	0.1465	-0.0409	0.1842	0.2325	0.213	0.26	0.2124	0.1289	0.0582	0.05	0.1527	0.162531	0.2224	0.298	0.2882	0.244	0.2473	0.2462	0.2252	0.1432	0.2328	-0.0279	-0.0313	-0.042
chr15:86203987-86206182 (-) // 92.49 // q25.3	neurotrophic tyrosine kinase, receptor, type 3	NTRK3	213960_at	0.1895	0.1626	0.196	0.2732	0.2105	0.1581	-0.0205	0.1957	0.2245	0.2168	0.2353	0.2183	0.1116	0.0138	0.0023	0.2118	0.162469	0.2387	0.2638	0.3169	0.199	0.2012	0.2036	0.2707	0.0571	0.2753	-0.1023	-0.0956	-0.1143
chr22:26474265-26527486 (-) // 95.36 // q12.1	meningioma (disrupted in balanced translocation) 1	MN1	205330_at	0.2888	0.3474	0.1243	0.2253	0.1669	0.1476	0.0277	0.1763	0.2218	0.2015	0.2129	0.2028	0.1171	-0.0074	-0.0147	0.1611	0.162463	0.1982	0.212	0.2467	0.1832	0.1849	0.1858	0.1557	0.0272	0.1586	-0.0852	-0.0722	-0.0921
chr5:140494993-140497887 (+) // 99.18 // q31.3	protocadherin beta 5	PCDHB5	223629_at	0.1968	0.1762	0.1953	0.2115	0.199	0.2104	0.0087	0.21	0.1929	0.2152	0.219	0.2032	0.1544	0.0071	0.0227	0.1769	0.162456	0.0661	0.1079	0.1839	0.1549	0.1558	0.1558	0.2144	0.0433	0.2257	-0.0352	-0.0349	-0.033
chr1:65658925-65672077 (+) // 78.6 // p31.3	---	---	202377_at	0.1439	0.1966	0.0976	0.1651	0.1219	0.2105	-0.0565	0.2213	0.2393	0.2431	0.2207	0.2377	0.1504	0.1096	0.0524	0.2444	0.162375	0.1506	0.1776	0.3286	0.2222	0.2239	0.2277	0.088	-0.0383	0.0996	0.0917	0.0745	0.096
chr6:32116911-32121883 (-) // 99.39 // p21.32 /// chr6:32084175-32089028 (-) // 96.55 // p21.32 /// chr6_cox_hap1:3416090-3421063 (-) // 99.42 // /// chr6_qbl_hap2:3223933-3228906 (-) // 99.42 //	tenascin XA pseudogene /// tenascin XB	TNXA /// TNXB	206093_x_at	0.1423	0.1871	0.1135	0.1399	0.0958	0.007	-0.0656	0.3288	0.2763	0.2937	0.2235	0.2959	0.156	0.0134	0.0476	0.3416	0.1623	0.179	0.1569	0.3006	0.0969	0.1072	0.1066	0.0901	-0.0123	0.084	-0.0337	-0.0247	-0.0193
chr3:143925605-144007960 (+) // 89.1 // q23	transient receptor potential cation channel, subfamily C, member 1	TRPC1	211602_s_at	0.193	0.1738	0.1936	0.215	0.2236	0.2622	0.1843	0.2023	0.1695	0.1819	0.2096	0.1574	0.1697	-0.0716	-0.034	0.1641	0.16215	0.0553	0.2073	0.2098	0.3351	0.3248	0.3266	0.1513	0.0281	0.1616	-0.1417	-0.1361	-0.1616
chr5:16527222-16670210 (+) // 92.87 // p15.1	---	---	213662_at	0.1882	0.1738	0.2451	0.1973	0.286	0.1544	0.1196	0.1554	0.1378	0.1467	0.1572	0.1229	0.1886	0.0297	0.0731	0.2183	0.162131	0.0428	0.1092	0.1838	0.1991	0.1967	0.1977	0.3186	0.2745	0.344	-0.0729	-0.0656	-0.0862
chr6:32117104-32173950 (-) // 99.95 // p21.32 /// chr6_cox_hap1:3416283-3473141 (-) // 100.0 // /// chr6_qbl_hap2:3224126-3270193 (-) // 77.47 //	tenascin XB	TNXB	208609_s_at	0.1471	0.1775	0.1128	0.1524	0.1337	0.0306	-0.0375	0.306	0.2656	0.2702	0.2405	0.268	0.168	0.0054	0.0368	0.317	0.162131	0.1737	0.1667	0.2907	0.1256	0.134	0.134	0.097	-0.0041	0.0959	-0.0484	-0.041	-0.0467
chr19:40322231-40325794 (+) // 99.08 // q13.12	FXYD domain containing ion transport regulator 1 (phospholemman)	FXYD1	205384_at	0.3162	0.3965	0.1422	0.1744	0.1506	0.0511	-0.0528	0.2358	0.2302	0.2148	0.2121	0.2099	0.1216	-0.0383	-0.0193	0.2489	0.162119	0.2281	0.2746	0.341	0.2399	0.2468	0.248	0.1684	0.0272	0.1664	-0.0969	-0.0844	-0.1049
chr8:48810748-48811251 (-) // 96.35 // q11.21	KIAA0146	KIAA0146	228325_at	0.1657	0.1522	0.2007	0.2504	0.1937	0.1272	-0.0311	0.2007	0.2274	0.2294	0.239	0.2216	0.1249	0.0693	0.0601	0.1621	0.162081	0.2109	0.2432	0.3149	0.2335	0.2374	0.2397	0.2481	0.1283	0.2915	0.0048	0.0088	-0.0014
chrX:116915804-116965933 (-) // 95.15 // q24	kelch-like 13 (Drosophila)	KLHL13	227875_at	0.1674	0.1392	0.1209	0.2155	0.1629	0.1368	0.0121	0.2583	0.2295	0.2423	0.2541	0.2379	0.1697	0.0488	0.0393	0.1586	0.162081	0.0839	0.1142	0.1679	0.1297	0.1304	0.132	0.1459	0.0155	0.1621	-0.0315	-0.0301	-0.0355
chr19:50785838-50787159 (-) // 93.26 // q13.32	G protein-coupled receptor 4	GPR4	211266_s_at	0.1662	0.1228	0.132	0.2156	0.3403	0.0965	0.1498	0.207	0.2236	0.1825	0.1922	0.1901	0.2358	0.0105	0.0228	0.1026	0.161894	0.2394	0.2429	0.2318	0.1846	0.1926	0.1934	0.1799	0.0002	0.196	-0.0356	-0.0181	-0.048
chr10:21241836-21247090 (-) // 65.61 // p12.31	CDNA FLJ13895 fis, clone THYRO1001673	---	233280_at	0.2433	0.1806	0.1569	0.2586	0.1374	0.0885	-0.1068	0.1769	0.1832	0.2245	0.177	0.222	0.0887	0.2051	0.1847	0.1692	0.161862	0.2261	0.1812	0.2369	0.1011	0.1058	0.1065	0.2512	0.0432	0.2549	0.1391	0.137	0.1708
chr15:94680401-94682670 (+) // 95.37 // q26.2	nuclear receptor subfamily 2, group F, member 2	NR2F2	215073_s_at	0.1174	0.1841	0.1034	0.1944	0.1064	0.1832	0.0983	0.2575	0.2635	0.2317	0.2507	0.2332	0.1715	0.0507	0.0033	0.1405	0.161862	0.0666	0.0878	0.1821	0.1159	0.1182	0.1197	0.059	-0.0041	0.0643	0.0496	0.0451	0.052
chr4:109090054-109094142 (+) // 83.93 // q25	cytochrome P450, family 2, subfamily U, polypeptide 1	CYP2U1	226402_at	0.1993	0.2447	0.1657	0.184	0.1354	0.1946	-0.0353	0.2216	0.2391	0.2568	0.2311	0.2473	0.0926	-0.039	-0.0573	0.3062	0.161675	0.1019	0.1711	0.3065	0.2145	0.2123	0.2128	0.1781	0.0608	0.1617	-0.1148	-0.1241	-0.1165
chr13:48780786-48873649 (-) // 99.39 // q14.2	calcium binding protein 39-like	CAB39L	225914_s_at	0.2383	0.2	0.2188	0.2126	0.2459	0.1262	0.0246	0.1753	0.1499	0.1758	0.1755	0.1538	0.1278	0.0707	0.1159	0.1745	0.1616	0.1069	0.2417	0.2642	0.3203	0.318	0.3196	0.2065	0.0431	0.1899	-0.0647	-0.062	-0.0748
chr1:85819175-85821974 (+) // 99.84 // p22.3	cysteine-rich, angiogenic inducer, 61	CYR61	201289_at	0.0819	0.1064	0.1052	0.1614	0.1482	0.3005	0.0652	0.2948	0.2464	0.2398	0.2293	0.2559	0.245	0.0368	0.0026	0.0656	0.161563	0.0939	0.098	0.1604	0.0977	0.1015	0.1035	0.025	-0.0382	0.0508	0.038	0.0396	0.0502
chr2:223625163-223627852 (+) // 91.69 // q36.1	potassium voltage-gated channel, Isk-related family, member 4	KCNE4	1552507_at	0.1211	0.1109	0.1834	0.1791	0.1544	0.1275	0.0156	0.3482	0.263	0.2436	0.2228	0.2409	0.2678	-0.0229	0.0074	0.1219	0.161544	0.0964	0.1589	0.1797	0.2225	0.2268	0.2254	0.1203	0.0234	0.1222	0.0104	0.0084	-0.0016
chr8:43114803-43148516 (+) // 70.26 // p11.21	heparan-alpha-glucosaminide N-acetyltransferase	HGSNAT	1557064_s_at	0.1604	0.1631	0.1664	0.1517	0.1267	0.0366	-0.1487	0.3582	0.2839	0.2843	0.2291	0.2836	0.2338	-0.0201	0.0494	0.2254	0.161488	0.2154	0.1872	0.2572	0.1323	0.1391	0.1386	0.1941	-0.0038	0.1731	0.0259	0.037	0.031
chr15:61123314-61151167 (+) // 74.7 // q22.2	tropomyosin 1 (alpha)	TPM1	210986_s_at	0.0721	0.0885	0.0784	0.106	0.1155	0.2545	0.0654	0.2793	0.229	0.2505	0.2016	0.2622	0.1791	0.1879	0.1269	0.0863	0.16145	0.0244	0.0559	0.123	0.0751	0.0748	0.0769	0.0194	-0.0402	0.0317	0.1328	0.1203	0.1802
chrX:71288889-71289861 (+) // 90.4 // q13.1	CDNA FLJ30378 fis, clone BRACE2007953	---	227618_at	0.177	0.1478	0.151	0.225	0.2512	0.0995	-0.0377	0.2452	0.2663	0.2684	0.2585	0.2635	0.1569	-0.0566	-0.0509	0.2176	0.161419	0.208	0.2373	0.2925	0.2076	0.2104	0.2094	0.2985	0.1276	0.2784	-0.0986	-0.0902	-0.1109
chr11:12355685-12458932 (+) // 66.2 // p15.3	parvin, alpha	PARVA	215418_at	0.1236	0.1143	0.1	0.0931	0.0362	0.0007	-0.1176	0.4272	0.3163	0.36	0.2492	0.367	0.2139	0.0722	0.0824	0.1441	0.161413	0.0829	0.0756	0.1426	0.0323	0.0371	0.0375	0.0541	-0.044	0.0627	0.1512	0.1521	0.2132
---	Transcribed locus	---	240331_at	0.1987	0.181	0.1382	0.2201	0.1113	0.0919	-0.0442	0.2506	0.2455	0.2644	0.2304	0.2807	0.1599	0.0915	0.061	0.0993	0.161269	0.1808	0.181	0.2383	0.1263	0.1281	0.1271	0.2171	0.0358	0.1896	0.1145	0.1066	0.155
chr21:32605200-32635807 (-) // 90.2 // q22.11	URB1 ribosome biogenesis 1 homolog (S. cerevisiae)	URB1	208395_s_at	0.1733	0.1292	0.1319	0.1832	0.1909	0.1216	0.0929	0.2336	0.2215	0.2273	0.2312	0.2232	0.1867	0.0532	0.089	0.091	0.161231	0.1483	0.1618	0.1555	0.1071	0.1091	0.1129	0.1707	-0.005	0.1891	0.0201	0.0332	0.022
chr17:38166737-38168580 (+) // 98.85 // q21.31	receptor (G protein-coupled) activity modifying protein 2	RAMP2	205779_at	0.1916	0.2236	0.1312	0.1753	0.2015	0.0693	-0.0171	0.2273	0.2372	0.2085	0.2105	0.198	0.1302	0.007	0.0347	0.3486	0.161087	0.167	0.17	0.2858	0.1453	0.1541	0.1538	0.1721	0.0181	0.1868	-0.0072	-0.0065	-0.0233
chr6:31815778-31840792 (+) // 95.31 // p21.33 /// chr6_cox_hap1:3153915-3178907 (+) // 95.28 // /// chr6_qbl_hap2:2955384-2977024 (+) // 53.67 //	mutS homolog 5 (E. coli) /// chromosome 6 open reading frame 26	C6orf26 /// MSH5	212913_at	0.1895	0.1675	0.1639	0.2426	0.1194	0.1702	-0.0908	0.1941	0.2431	0.2542	0.2455	0.2498	0.1376	0.0719	0.0368	0.1809	0.161012	0.162	0.1834	0.2525	0.1443	0.1446	0.1448	0.3512	0.0719	0.3239	-0.0518	-0.0509	-0.0234
chr13:35773777-35774234 (-) // 51.81 // q13.3	spastic paraplegia 20 (Troyer syndrome)	SPG20	236600_at	0.1447	0.2331	0.1267	0.1622	0.0831	0.1256	-0.0478	0.2712	0.295	0.3016	0.2839	0.2959	0.1338	-0.047	-0.078	0.2921	0.161006	0.068	0.1057	0.2677	0.1287	0.1295	0.1305	0.1144	0.1087	0.1291	-0.0745	-0.0792	-0.0559
chr13:40008397-40009324 (-) // 61.58 // q14.11	Homo sapiens, clone IMAGE:4042988	---	1563077_at	0.1815	0.2045	0.1465	0.1756	0.1588	0.0413	0.0301	0.2484	0.249	0.2628	0.1955	0.2595	0.1461	0.0049	0.004	0.2675	0.161	0.216	0.2192	0.2985	0.1547	0.1541	0.1548	0.2868	0.1379	0.2606	-0.0302	-0.027	-0.0053
chr3:124483832-124484478 (-) // 94.02 // q21.1	adenylate cyclase 5	ADCY5	228182_at	0.1686	0.1829	0.1421	0.2118	0.2273	0.104	-0.0023	0.2201	0.2274	0.2268	0.2218	0.2243	0.1442	0.0101	0.0235	0.2424	0.160938	0.158	0.1607	0.2444	0.1338	0.1374	0.1367	0.1996	0.0397	0.2044	-0.076	-0.06	-0.0845
chr1:181259175-181381350 (+) // 98.25 // q25.3	laminin, gamma 1 (formerly LAMB2)	LAMC1	200771_at	0.1397	0.218	0.0686	0.1405	0.0899	0.2246	0.0298	0.2565	0.2352	0.249	0.1922	0.2515	0.1694	0.0171	-0.0078	0.299	0.160825	0.026	0.0353	0.1803	0.0621	0.0634	0.0674	-0.006	-0.061	0.01	0.0339	0.032	0.054
chr2:160496764-160506603 (-) // 95.96 // q24.2	phospholipase A2 receptor 1, 180kDa	PLA2R1	240039_at	0.1382	0.1411	0.147	0.1907	0.1811	0.0574	0.2442	0.2165	0.2188	0.2033	0.2316	0.204	0.1823	0.0665	0.0712	0.0792	0.160819	0.093	0.1296	0.1391	0.0688	0.0708	0.0709	0.1194	0.0375	0.1303	-0.001	0.0067	0.0243
chr1:166276272-166276990 (+) // 67.82 // q24.2	Transcribed locus	---	235613_at	0.2083	0.1697	0.1154	0.202	0.0901	0.0427	-0.1628	0.2804	0.2612	0.3362	0.245	0.3332	0.1355	0.0776	0.0585	0.179	0.16075	0.2321	0.2551	0.3177	0.1947	0.1942	0.1942	0.3075	0.0868	0.2501	0.1266	0.1218	0.1835
chr11:113630901-113631908 (+) // 84.57 // q23.2	Transcribed locus	---	228854_at	0.2442	0.2721	0.1455	0.2043	0.1618	0.0597	-0.0529	0.2422	0.2667	0.2514	0.253	0.2466	0.1113	-0.0548	-0.0399	0.2571	0.160519	0.318	0.3226	0.3593	0.219	0.227	0.2263	0.2546	0.0862	0.2696	-0.1143	-0.103	-0.1182
chr2:242040172-242040723 (+) // 74.73 // q37.3	Transcribed locus	---	242932_at	0.1788	0.1154	0.1303	0.1731	0.1416	0.0486	-0.14	0.2081	0.1909	0.2438	0.1946	0.243	0.1175	0.2862	0.2872	0.1492	0.160519	0.2207	0.2243	0.2376	0.1511	0.1503	0.1519	0.2785	0.0345	0.2545	0.1105	0.0981	0.1573
chr19:9729734-9740410 (-) // 84.46 // p13.2	hypothetical protein LOC162993	LOC162993	1564331_at	0.1972	0.1668	0.1916	0.1694	0.2498	0.1652	0.0261	0.196	0.178	0.176	0.2059	0.1637	0.1725	0.0606	0.101	0.1478	0.160475	0.1139	0.204	0.2193	0.276	0.2707	0.272	0.2099	0.1943	0.2204	-0.0503	-0.0481	-0.0663
chr17:19492718-19519647 (+) // 99.5 // p11.2	aldehyde dehydrogenase 3 family, member A2	ALDH3A2	202053_s_at	0.2128	0.2109	0.1582	0.2153	0.1708	0.1195	0.0692	0.1186	0.1122	0.1229	0.1326	0.1084	0.1015	0.2517	0.2766	0.1852	0.1604	0.1108	0.1964	0.2369	0.2109	0.2111	0.214	0.1421	0.003	0.1592	0.0419	0.0368	0.0143
chr5:138835296-138842527 (-) // 78.42 // q31.2	transmembrane protein 173	TMEM173	224929_at	0.169	0.151	0.1407	0.1809	0.2026	0.1184	-0.0544	0.2214	0.2321	0.2181	0.2036	0.2322	0.1668	0.123	0.1314	0.1289	0.160356	0.1543	0.1413	0.2057	0.1221	0.1266	0.1274	0.2039	0.0434	0.1677	0.1516	0.1411	0.1424
chr15:98329160-98699650 (-) // 91.71 // q26.3	ADAM metallopeptidase with thrombospondin type 1 motif, 17	ADAMTS17	1552727_s_at	0.1223	0.1111	0.1512	0.1809	0.1949	0.1291	-0.0072	0.2056	0.2271	0.2387	0.2386	0.2314	0.2612	0.0666	0.0623	0.1497	0.160219	0.0821	0.0907	0.1681	0.113	0.1123	0.1149	0.1713	0.0848	0.1437	-0.0301	-0.0296	-0.0242
chr2:206276133-206278152 (+) // 77.55 // q33.3	CDNA FLJ13880 fis, clone THYRO1001434	---	232701_at	0.1278	0.0922	0.107	0.1362	0.118	0.0881	0.0092	0.3209	0.2585	0.3168	0.2375	0.3244	0.2159	0.0467	0.071	0.0928	0.160187	0.1204	0.1345	0.1531	0.0963	0.0992	0.0993	0.1247	0.0028	0.1141	0.0534	0.0586	0.0776
chr18:76016110-76017455 (-) // 92.89 // q23	par-6 partitioning defective 6 homolog gamma (C. elegans)	PARD6G	227204_at	0.1051	0.1178	0.119	0.194	0.0667	0.1579	0.0111	0.1829	0.1875	0.1871	0.1776	0.1936	0.1486	0.3044	0.2908	0.1174	0.160094	0.1095	0.1122	0.1717	0.0987	0.1005	0.1016	0.0946	-0.0062	0.0997	-0.0239	-0.0127	-0.0284
chr6:35649344-35651470 (-) // 95.44 // p21.31	FK506 binding protein 5	FKBP5	224840_at	0.247	0.2457	0.1683	0.2122	0.2066	0.0953	-0.0188	0.1842	0.2018	0.2225	0.2213	0.2121	0.1182	0.0196	0.0078	0.2176	0.160087	0.197	0.2498	0.3214	0.2638	0.2663	0.2659	0.3419	0.2472	0.3487	-0.0867	-0.0856	-0.0987
chr11:12355677-12508919 (+) // 93.27 // p15.3	parvin, alpha	PARVA	222454_s_at	0.1403	0.1822	0.0752	0.1088	0.1582	0.3171	0.1067	0.214	0.1915	0.1806	0.1855	0.182	0.201	0.0965	0.0781	0.1434	0.160069	0.0145	0.0468	0.1183	0.0943	0.0939	0.097	-0.0049	-0.0607	0.0091	0.0649	0.0527	0.0555
chr11:74888110-74891075 (-) // 76.41 // q13.4	Transcribed locus	---	233733_at	0.1403	0.1432	0.1221	0.2293	0.208	0.0849	0.0377	0.2098	0.2494	0.1958	0.2137	0.212	0.2185	0.0787	0.0835	0.1339	0.16005	0.3024	0.2365	0.218	0.1044	0.1156	0.1134	0.2379	0.0504	0.2371	-0.0559	-0.0173	-0.0815
chr19:57579034-57580856 (+) // 78.88 // q13.33	zinc finger-like	LOC400713	232315_at	0.1989	0.1818	0.1859	0.1795	0.1467	0.1844	-0.0469	0.2373	0.1918	0.2626	0.2215	0.2355	0.1525	-0.0028	0.0056	0.2246	0.159931	0.0539	0.1324	0.2312	0.2056	0.2059	0.206	0.2207	0.0465	0.2187	-0.0145	-0.0296	0.0053
chr7:150737254-150742179 (+) // 39.63 // q36.1	Similar to hCG1991662	LOC100131176	1560147_at	0.2847	0.2382	0.1421	0.2043	0.1979	0.1141	0.0437	0.1603	0.1391	0.1773	0.1461	0.1675	0.1133	0.1327	0.1297	0.1677	0.159919	0.0624	0.0964	0.1687	0.1032	0.1044	0.1055	0.3389	0.1494	0.3144	0.0815	0.0729	0.0962
chr11:116575295-116580686 (+) // 99.17 // q23.3	transgelin	TAGLN	205547_s_at	0.0821	0.0736	0.0835	0.0981	0.1163	0.1753	0.0176	0.3845	0.2845	0.296	0.2353	0.3089	0.195	0.0349	0.064	0.1076	0.159825	0.0601	0.0739	0.1356	0.0693	0.0717	0.0729	0.0439	-0.0232	0.0558	0.0653	0.0652	0.0817
chr12:7038293-7048508 (+) // 99.81 // p13.31	complement component 1, s subcomponent	C1S	208747_s_at	0.1236	0.1237	0.1212	0.1479	0.0904	0.0496	-0.098	0.3231	0.2747	0.3199	0.2205	0.3227	0.1516	0.0827	0.0907	0.2109	0.1597	0.176	0.2468	0.3703	0.2506	0.2573	0.261	0.1036	-0.0197	0.1203	0.1389	0.1339	0.1763
chr4:26471662-26636101 (+) // 96.17 // p15.2	stromal interaction molecule 2	STIM2	225250_at	0.1825	0.1551	0.1206	0.2264	0.1348	0.1186	-0.0734	0.2095	0.2574	0.2743	0.2723	0.2808	0.1539	0.0365	0.0086	0.1954	0.159581	0.2156	0.2134	0.2422	0.1115	0.1115	0.113	0.4231	0.1232	0.3481	-0.0745	-0.0805	-0.0759
chr1:61491461-61493417 (+) // 99.34 // p31.3	Hypothetical protein LOC645030	LOC645030	232932_at	0.1874	0.1748	0.1989	0.2221	0.1595	0.0762	-0.0861	0.261	0.2249	0.193	0.1544	0.2035	0.2733	0.0434	0.0971	0.1689	0.159519	0.2854	0.2651	0.2829	0.2249	0.228	0.2255	0.1823	0.0206	0.159	0.0433	0.0636	0.0387
chr8:421403-421866 (-) // 76.84 // p23.3	Transcribed locus	---	241002_at	0.1337	0.1145	0.1021	0.1904	0.1052	0.0577	-0.0157	0.2693	0.2964	0.2744	0.2795	0.2925	0.2118	0.0511	0.0465	0.1417	0.159444	0.1197	0.125	0.1719	0.0553	0.0571	0.0586	0.1997	0.0825	0.1932	0.0258	0.0365	0.0605
chr3:33130557-33159661 (+) // 73.27 // p22.3	cartilage associated protein	CRTAP	1555889_a_at	0.1286	0.2084	0.1241	0.152	0.1043	0.2147	0.012	0.265	0.2429	0.2265	0.2126	0.2309	0.189	-0.0247	-0.0236	0.2873	0.159375	0.0832	0.0788	0.2107	0.1043	0.1086	0.1088	0.0608	0.0196	0.061	-0.0323	-0.0334	-0.0492
chr1:221966835-222030160 (+) // 98.54 // q41	calpain 2, (m/II) large subunit	CAPN2	208683_at	0.1398	0.1677	0.1064	0.1481	0.1096	0.2981	0.0611	0.1339	0.125	0.1471	0.1132	0.1491	0.1258	0.3383	0.2956	0.0906	0.159337	0.0063	0.0086	0.0795	0.0356	0.036	0.0389	0.0478	-0.038	0.0496	0.2644	0.2488	0.2721
chr2:164167710-164168656 (-) // 95.55 // q24.3	fidgetin	FIGN	238964_at	0.2396	0.2401	0.159	0.219	0.1219	0.1097	0.0048	0.2361	0.1996	0.2392	0.1857	0.2428	0.128	-0.054	-0.0502	0.3274	0.159294	0.1543	0.2067	0.2705	0.1939	0.1928	0.1908	0.1829	0.0282	0.1612	-0.0563	-0.054	-0.0408
chr14:71002479-71003050 (+) // 78.71 // q24.2	CDNA FLJ26461 fis, clone KDN03867	---	239600_at	0.185	0.1237	0.0891	0.2414	0.1589	0.0597	-0.05	0.2456	0.2755	0.3007	0.2554	0.3201	0.1489	0.0526	0.0321	0.1081	0.159175	0.3072	0.2664	0.2981	0.1538	0.1565	0.1582	0.3323	0.1252	0.2786	0.0166	0.0171	0.0404
chr13:19659610-19661919 (-) // 99.05 // q12.11	gap junction protein, beta 2, 26kDa	GJB2	223278_at	0.1041	0.0911	0.133	0.1622	0.1389	0.1156	0.03	0.1177	0.1176	0.1384	0.1205	0.1368	0.1011	0.4683	0.4827	0.0876	0.1591	0.0917	0.1144	0.1407	0.1144	0.1153	0.117	0.1263	0.0215	0.1232	0.0755	0.0869	0.0569
chr5:156125604-156127374 (+) // 90.51 // q33.3	MRNA from chromosome 5q31-33 region	---	213543_at	0.276	0.3491	0.1274	0.091	0.1237	0.1535	-0.0132	0.2492	0.2374	0.2242	0.2156	0.2155	0.1597	-0.029	-0.0117	0.177	0.159088	0.0722	0.1	0.1537	0.1226	0.1242	0.1234	0.0851	0.0035	0.0935	-0.0391	-0.0331	-0.0372
chr14:74606107-74614544 (+) // 95.98 // q24.3	chromosome 14 open reading frame 140	C14orf140	220107_s_at	0.3049	0.2639	0.2101	0.2194	0.2547	0.1128	0.0082	0.1721	0.1408	0.1622	0.1586	0.1486	0.0991	0.0632	0.1186	0.1078	0.159062	0.1909	0.2947	0.2618	0.3332	0.3379	0.3363	0.1781	0.0433	0.1637	0.0248	0.0196	0.0282
chr11:44073674-44223551 (+) // 97.31 // p11.2	exostoses (multiple) 2	EXT2	202012_s_at	0.1212	0.1523	0.1159	0.1536	0.1194	0.3589	0.1268	0.187	0.1593	0.1665	0.1584	0.1635	0.1429	0.1575	0.1223	0.1295	0.158438	0.0101	0.0503	0.1311	0.1097	0.1067	0.1105	0.0355	-0.0671	0.0384	-0.0207	-0.0311	-0.0297
chr15:86416785-86480745 (-) // 99.86 // q25.3	neurotrophic tyrosine kinase, receptor, type 3	NTRK3	1557795_s_at	0.1822	0.1297	0.1988	0.2162	0.2774	0.1012	0.0887	0.2285	0.1819	0.1828	0.2063	0.1663	0.2109	-0.0299	0.0395	0.1544	0.158431	0.1706	0.2442	0.2264	0.2373	0.2415	0.2428	0.2049	0.0195	0.2127	-0.1034	-0.0719	-0.1204
chr19:11314453-11317965 (-) // 95.82 // p13.2	hypothetical protein MGC3205 /// transmembrane protein 205	MGC3205 /// TMEM205	225003_at	0.2252	0.1924	0.1132	0.2316	0.2256	0.1373	0.0636	0.1521	0.1994	0.1891	0.2191	0.1801	0.1298	0.0539	0.0603	0.16	0.158294	0.1375	0.2054	0.2564	0.1905	0.1905	0.1938	0.2228	-0.0061	0.2319	0.1286	0.1194	0.1107
chr6:151720558-151721030 (-) // 96.33 // q25.1	Transcribed locus	---	231067_s_at	0.1322	0.1544	0.1017	0.2029	0.1421	0.2415	0.0547	0.2537	0.2315	0.266	0.2445	0.2587	0.1412	-0.0137	-0.0439	0.1628	0.158144	0.0615	0.1029	0.2001	0.1247	0.1236	0.1272	0.1313	0.0486	0.145	-0.1027	-0.1022	-0.1073
chr12:6910384-6910833 (+) // 96.77 // p13.31	Transcribed locus	---	236961_at	0.1629	0.1844	0.1494	0.1875	0.0982	0.0895	-0.1694	0.3053	0.293	0.2864	0.2469	0.2898	0.1788	-0.0227	-0.0076	0.2568	0.158075	0.2122	0.1705	0.2481	0.0949	0.1016	0.1001	0.1542	-0.0437	0.1459	0.0449	0.0471	0.0698
chr2:33213233-33477914 (+) // 98.6 // p22.3	latent transforming growth factor beta binding protein 1	LTBP1	202729_s_at	0.1136	0.1423	0.1275	0.1628	0.1166	0.2371	0.0734	0.2431	0.2633	0.2414	0.2135	0.2451	0.1347	0.0722	0.0472	0.0952	0.158063	0.1087	0.129	0.1853	0.1414	0.1438	0.1441	0.0611	0.0724	0.0701	-0.005	-0.0001	0.0154
chr3:135358482-135452276 (-) // 90.7 // q22.1	RYK receptor-like tyrosine kinase	RYK	214172_x_at	0.1622	0.2094	0.1147	0.1559	0.0642	0.2863	0.0477	0.195	0.1599	0.1679	0.1919	0.1554	0.1479	0.1614	0.1345	0.1736	0.157994	0.0089	0.0515	0.1217	0.1054	0.1033	0.1053	0.0344	-0.0483	0.0428	0.0243	0.0144	0.0058
chr5:127303290-127304628 (-) // 97.37 // q23.3	hypothetical LOC644873	FLJ33630	244769_at	0.1892	0.1824	0.1734	0.1762	0.2052	0.1188	-0.0068	0.2164	0.2173	0.2299	0.1798	0.2218	0.1857	-0.0173	0.0363	0.2195	0.157988	0.1986	0.2111	0.2445	0.1759	0.1751	0.1771	0.257	0.0445	0.2065	-0.0805	-0.0582	-0.0843
chr5:102392714-102393319 (+) // 63.25 // q21.1	peptidylglycine alpha-amidating monooxygenase	PAM	212958_x_at	0.1516	0.1848	0.1838	0.1999	0.1071	0.205	-0.0066	0.2414	0.2139	0.2285	0.1832	0.2286	0.1367	0.0538	0.0484	0.1648	0.157806	0.0737	0.0906	0.1754	0.0879	0.0927	0.0955	0.0725	-0.0567	0.0904	0.0966	0.0941	0.1173
chr11:107848043-107862262 (-) // 81.1 // q22.3	KDEL (Lys-Asp-Glu-Leu) containing 2	KDELC2	225128_at	0.1818	0.265	0.1116	0.1565	0.0478	0.2499	0.0358	0.2021	0.195	0.2009	0.1958	0.1957	0.1242	0.0503	-0.0125	0.3227	0.157662	0.0423	0.0708	0.1761	0.1071	0.1068	0.1081	0.0423	-0.0135	0.0483	-0.0425	-0.0485	-0.0337
chr5:140772926-140775479 (+) // 100.0 // q31.3	protocadherin gamma subfamily A, 10	PCDHGA10	211875_x_at	0.1637	0.1087	0.101	0.1881	0.1659	0.0825	-0.0373	0.2965	0.2225	0.2665	0.2063	0.2804	0.2026	0.0558	0.095	0.124	0.157638	0.1153	0.1235	0.1692	0.107	0.1138	0.1141	0.1854	-0.0165	0.1658	0.0731	0.0885	0.0942
chr1:153432020-153444312 (-) // 99.87 // q22	thrombospondin 3	THBS3	209561_at	0.1729	0.1457	0.1247	0.164	0.1126	0.1826	0.0233	0.2655	0.2333	0.2597	0.197	0.2677	0.1362	0.0014	0.0371	0.1972	0.157556	0.0957	0.0951	0.1335	0.0735	0.0742	0.0747	0.0646	-0.046	0.0594	0.1505	0.1534	0.1758
chr1:864515-869502 (+) // 99.88 // p36.33	sterile alpha motif domain containing 11	SAMD11	1560477_a_at	0.2114	0.1919	0.1294	0.2286	0.2156	0.2127	0.0756	0.1889	0.1999	0.1643	0.1808	0.1707	0.1891	0.0037	0.0103	0.1436	0.157281	0.2152	0.1999	0.1826	0.1683	0.1768	0.1756	0.1083	-0.0108	0.115	0.007	0.0154	-0.0128
chr6:109414339-109521970 (-) // 98.96 // q21	sestrin 1	SESN1	218346_s_at	0.2687	0.309	0.1342	0.1845	0.1358	0.0789	-0.1065	0.2132	0.2238	0.2402	0.229	0.235	0.0993	0.0339	0.0307	0.2052	0.157181	0.1902	0.2412	0.2967	0.2295	0.2277	0.2288	0.2847	0.0914	0.2423	-0.0927	-0.0972	-0.0967
chr14:71065794-71275871 (+) // 99.07 // q24.2	signal-induced proliferation-associated 1 like 1	SIPA1L1	202255_s_at	0.2078	0.1397	0.1511	0.232	0.2668	0.201	0.1029	0.1686	0.1926	0.1941	0.2157	0.19	0.1194	0.0077	0.0204	0.1049	0.157169	0.2244	0.2972	0.2666	0.2941	0.2922	0.2908	0.2819	0.0755	0.2618	-0.0893	-0.0886	-0.1152
chr10:88720477-88758724 (+) // 97.79 // q23.2	KIAA1975 protein similar to MRIP2	KIAA1975	1557380_at	0.2101	0.2154	0.1893	0.1586	0.1746	0.0701	0.0348	0.2375	0.1636	0.1744	0.1454	0.1548	0.148	0.0186	0.0955	0.3208	0.156969	0.1228	0.1778	0.2643	0.188	0.1899	0.1877	0.148	0.0187	0.142	-0.0739	-0.0657	-0.0805
chr22:26707255-26831665 (-) // 99.76 // q12.1	tetratricopeptide repeat domain 28	TTC28	215146_s_at	0.1707	0.2027	0.1645	0.1766	0.0604	0.1338	-0.0664	0.287	0.2606	0.309	0.2581	0.3024	0.127	-0.0726	-0.0905	0.2878	0.156944	0.0751	0.1218	0.22	0.1177	0.1184	0.1198	0.097	-0.038	0.1004	-0.018	-0.0236	0.0163
chr11:3401024-3402439 (+) // 76.51 // p15.4 /// chr11:67330082-67331500 (+) // 76.4 // q13.2 /// chr12:8287527-8288941 (+) // 78.17 // p13.31 /// chr16:5088449-5089861 (+) // 77.55 // p13.3 /// chr3:75567635-75569043 (+) // 78.07 // p12.3 /// chr3:131313726-131315125 (+) // 93.76 // q21.3 /// chr4:4008749-4010161 (+) // 76.61 // p16.2 /// chr8:12089671-12091083 (+) // 80.25 // p23.1 /// chr8:1233…	CDNA clone IMAGE:5285282	---	238716_at	0.1565	0.1281	0.162	0.153	0.1205	0.169	-0.0111	0.3247	0.2081	0.2586	0.2082	0.2525	0.2002	-0.005	0.0312	0.1537	0.156888	0.0452	0.1191	0.1966	0.1793	0.1792	0.1795	0.1417	-0.0141	0.1149	-0.0112	-0.0146	0.0143
chr4:123019882-123074061 (-) // 95.65 // q27	transient receptor potential cation channel, subfamily C, member 3	TRPC3	206425_s_at	0.2072	0.1788	0.1829	0.239	0.2544	0.1249	0.0429	0.1782	0.2068	0.1809	0.1953	0.1856	0.1751	0.0111	0.0231	0.1231	0.156831	0.1939	0.1827	0.1926	0.1685	0.1747	0.1728	0.2457	0.0721	0.2644	-0.0583	-0.0464	-0.0647
chr11:116575300-116580686 (+) // 84.52 // q23.3	transgelin	TAGLN	1555724_s_at	0.0874	0.077	0.0733	0.0906	0.1266	0.1679	0.026	0.3728	0.2725	0.2889	0.2316	0.2995	0.1969	0.026	0.059	0.1128	0.1568	0.0462	0.0708	0.1293	0.0834	0.0853	0.0869	0.0376	-0.026	0.0526	0.0633	0.0622	0.0739
chr10:34513650-34514024 (-) // 95.41 // p11.21	Transcribed locus	---	237782_at	0.1659	0.1557	0.1928	0.198	0.1093	-0.0064	-0.061	0.2529	0.2104	0.2393	0.155	0.2454	0.1676	0.1576	0.1986	0.1259	0.156688	0.1956	0.1703	0.1885	0.0863	0.0912	0.0909	0.1454	-0.026	0.1402	0.0922	0.1107	0.1505
chr11:94541506-94542519 (-) // 96.61 // q21	CDNA FLJ33813 fis, clone CTONG2002744	---	235150_at	0.2055	0.174	0.2191	0.2237	0.2316	0.1444	0.0394	0.1721	0.1691	0.1797	0.2109	0.1557	0.1607	0.0254	0.0563	0.1391	0.156669	0.1101	0.2664	0.2596	0.4205	0.4218	0.4196	0.2189	0.0721	0.2333	-0.075	-0.0741	-0.0944
chrX:64052406-64171322 (-) // 84.77 // q11.1	KIAA1166	KIAA1166	225784_s_at	0.2197	0.1939	0.1657	0.2234	0.2262	0.232	0.0353	0.176	0.1755	0.1834	0.2252	0.1781	0.1521	-0.0576	-0.0458	0.2222	0.156581	0.1546	0.1961	0.2109	0.1879	0.1883	0.1897	0.2475	0.0345	0.2183	-0.1581	-0.155	-0.1821
chr5:175752104-175776111 (-) // 100.0 // q35.2	clathrin, light chain (Lcb)	CLTB	206284_x_at	0.1404	0.1408	0.1191	0.1858	0.1668	0.1738	0.099	0.0715	0.0971	0.0727	0.0949	0.0774	0.0641	0.4594	0.441	0.1002	0.1565	0.1117	0.1255	0.1465	0.1057	0.1065	0.1083	0.1085	-0.0156	0.1116	0.0216	0.0232	-0.0093
chr11:57174053-57176533 (+) // 27.5 // q12.1	CLP1, cleavage and polyadenylation factor I subunit, homolog (S. cerevisiae)	CLP1	1566152_a_at	0.165	0.1506	0.1351	0.163	0.1621	0.1266	0.0572	0.2437	0.2086	0.2218	0.1836	0.2188	0.2605	-0.0041	0.0359	0.1749	0.156456	0.1052	0.1318	0.1356	0.1198	0.122	0.1209	0.1212	0.0315	0.1104	-0.0341	-0.015	-0.0307
chr19:7063265-7064963 (-) // 98.84 // p13.2	insulin receptor	INSR	226450_at	0.1824	0.1947	0.2127	0.2259	0.1521	0.0407	-0.0979	0.223	0.2283	0.2381	0.203	0.2344	0.0748	0.0908	0.0793	0.2201	0.1564	0.1417	0.1707	0.2812	0.1348	0.1366	0.1404	0.2374	0.0901	0.2698	0.0426	0.0325	0.0578
chr10:88718250-88720473 (+) // 98.81 // q23.2	chromosome 10 open reading frame 116	C10orf116	203571_s_at	0.2258	0.314	0.1373	0.1591	0.119	0.0483	-0.068	0.1944	0.1904	0.1998	0.1542	0.1798	0.0618	0.0668	0.0806	0.4377	0.156312	0.1213	0.17	0.3264	0.1645	0.1679	0.1663	0.1436	0.0144	0.1437	0.007	0.0008	0.0125
chr3:143925955-144009420 (+) // 97.58 // q23	transient receptor potential cation channel, subfamily C, member 1	TRPC1	205802_at	0.1581	0.1944	0.1319	0.205	0.0794	0.1728	0.009	0.2705	0.2711	0.2711	0.2681	0.2733	0.1198	-0.0503	-0.0897	0.2164	0.156306	0.1312	0.1695	0.2642	0.1654	0.1658	0.1656	0.1638	0.1194	0.1669	-0.1229	-0.1211	-0.1149
chr4:89232224-89298777 (-) // 98.72 // q22.1	ATP-binding cassette, sub-family G (WHITE), member 2	ABCG2	209735_at	0.14	0.1023	0.1122	0.1996	0.1554	0.1067	0.0359	0.1709	0.2148	0.1856	0.2357	0.1875	0.1716	0.2222	0.1683	0.0916	0.156269	0.1513	0.166	0.1913	0.1386	0.1409	0.1418	0.293	0.0829	0.3045	-0.0469	-0.0435	-0.037
chr5:77816808-77841687 (-) // 97.02 // q14.1	lipoma HMGIC fusion partner-like 2	LHFPL2	212658_at	0.1077	0.0932	0.1421	0.1889	0.1854	0.1507	0.0263	0.222	0.219	0.23	0.2135	0.2286	0.2075	0.0681	0.0603	0.1566	0.156244	0.0775	0.0757	0.1568	0.122	0.1238	0.127	0.1691	0.0673	0.1937	0.0011	0.0018	0.0036
chr2:43837759-43846435 (+) // 96.08 // p21	pleckstrin homology domain containing, family H (with MyTH4 domain) member 2	PLEKHH2	243650_at	0.1693	0.147	0.185	0.2131	0.1653	0.1086	0.0101	0.2384	0.1898	0.219	0.1834	0.2069	0.178	0.0343	0.0638	0.185	0.156063	0.122	0.2079	0.2246	0.2684	0.2657	0.2627	0.1369	0.0087	0.1287	0.0408	0.0397	0.053
chr1:194553761-194555556 (-) // 92.37 // q31.3	Potassium channel, subfamily T, member 2	KCNT2	234103_at	0.1518	0.1281	0.1559	0.2152	0.1583	0.1158	-0.0385	0.2609	0.2005	0.2558	0.1994	0.2586	0.155	0.0277	0.0384	0.2128	0.155981	0.1264	0.1498	0.2658	0.1296	0.1331	0.1357	0.2326	0.0514	0.1857	-0.0335	-0.0313	-0.0291
chr8:134318600-134378650 (-) // 98.87 // q24.22	N-myc downstream regulated gene 1	NDRG1	200632_s_at	0.107	0.0972	0.1571	0.213	0.1242	0.1188	-0.0445	0.1801	0.1811	0.1984	0.1574	0.2007	0.1106	0.304	0.2754	0.1149	0.155962	0.1415	0.1442	0.2055	0.1266	0.1305	0.1315	0.1621	0.0135	0.1592	0.0731	0.0789	0.0921
chr3:172853725-172878345 (-) // 75.1 // q26.31	phospholipase D1, phosphatidylcholine-specific	PLD1	1557126_a_at	0.1326	0.1066	0.1393	0.2072	0.1645	0.1045	0.0188	0.1951	0.1977	0.2088	0.2067	0.2019	0.1391	0.1749	0.1535	0.1438	0.155938	0.208	0.2372	0.2952	0.2429	0.2416	0.2421	0.1906	0.0615	0.2106	-0.0627	-0.0559	-0.0514
chrX:73355869-73356415 (+) // 65.68 // q13.2	Transcribed locus	---	242299_at	0.125	0.1541	0.1306	0.2519	0.1498	0.1216	-0.0721	0.2163	0.2585	0.2238	0.2622	0.2339	0.185	0.0847	0.0398	0.1299	0.155938	0.1929	0.1528	0.2343	0.1272	0.1315	0.1313	0.1775	0.0709	0.2268	-0.0275	-0.0167	-0.0289
chr8:41238635-41286137 (-) // 98.81 // p11.21	secreted frizzled-related protein 1	SFRP1	202037_s_at	0.1749	0.2098	0.2488	0.2239	0.1084	0.1402	-0.0343	0.2661	0.2251	0.2403	0.1935	0.2373	0.1383	-0.0314	-0.0034	0.1527	0.155637	0.1563	0.1738	0.2235	0.1733	0.1797	0.1795	0.0589	-0.0185	0.0631	-0.0176	-0.0192	-0.0179
chr5:140703784-140706274 (+) // 100.0 // q31.3	protocadherin gamma subfamily A, 3	PCDHGA3	211879_x_at	0.1748	0.0999	0.1425	0.1845	0.2606	0.1507	0.1983	0.2002	0.1643	0.1916	0.1852	0.1823	0.1735	0.0102	0.0703	0.1008	0.155606	0.0547	0.1185	0.1291	0.1527	0.1514	0.1524	0.1915	0.0073	0.1962	-0.0204	-0.0051	-0.0258
chr20:17498784-17536644 (+) // 98.68 // p12.1	destrin (actin depolymerizing factor)	DSTN	201022_s_at	0.1354	0.1602	0.1221	0.1458	0.0669	0.2068	-0.002	0.2132	0.1684	0.1976	0.16	0.1974	0.1194	0.2618	0.2144	0.1189	0.155394	0.005	0.025	0.1091	0.0674	0.0672	0.0699	-0.0025	-0.0852	0.028	0.1936	0.1762	0.2252
chr2:241944383-242082928 (+) // 100.0 // q37.3	FERM, RhoGEF and pleckstrin domain protein 2	FARP2	204511_at	0.2122	0.1787	0.1428	0.1613	0.1458	0.03	-0.0755	0.1748	0.1847	0.1914	0.1822	0.1931	0.062	0.2787	0.2893	0.1345	0.155375	0.1798	0.1816	0.2034	0.1136	0.117	0.1172	0.1914	0.0151	0.1956	0.1397	0.1211	0.1544
chr15:49908740-49991637 (+) // 88.82 // q21.2	tropomodulin 3 (ubiquitous)	TMOD3	223077_at	0.1047	0.137	0.1168	0.2076	0.1078	0.2302	0.0264	0.0938	0.1706	0.1369	0.2075	0.136	0.1441	0.3654	0.2114	0.0893	0.155344	0.1172	0.1427	0.1941	0.1541	0.1531	0.1547	0.1977	0.1894	0.2053	-0.02	-0.0183	-0.0426
chr8:74139686-74141738 (-) // 84.86 // q21.11	RPE-spondin	RPESP	214725_at	0.1911	0.1737	0.2164	0.2536	0.1997	0.1211	-0.0036	0.1981	0.1627	0.1942	0.1557	0.1878	0.1282	0.0495	0.0555	0.2009	0.155287	0.1362	0.1742	0.2703	0.2481	0.2473	0.2476	0.1677	0.0713	0.1715	0.0091	0.0067	0.0147
chr2:164170631-164171446 (-) // 99.63 // q24.3	fidgetin	FIGN	242828_at	0.2466	0.2561	0.1526	0.1988	0.0796	0.1201	-0.0586	0.2254	0.1995	0.2561	0.1923	0.2506	0.0997	-0.0472	-0.0597	0.3718	0.155231	0.1343	0.1717	0.2727	0.1714	0.1689	0.1688	0.1607	0.0081	0.1439	-0.069	-0.0736	-0.0568
chr7:114118632-114119223 (+) // 99.49 // q31.1	forkhead box P2	FOXP2	235201_at	0.1281	0.1515	0.14	0.1625	0.0672	0.0789	0.0095	0.249	0.2467	0.2329	0.2326	0.2347	0.1605	0.1071	0.1248	0.1559	0.155119	0.0361	0.0667	0.1012	0.0523	0.0516	0.0519	0.068	-0.011	0.0669	-0.0224	-0.0226	-0.0141
chr1:28791613-28793399 (+) // 53.46 // p35.3 /// chr14:89427893-89428729 (+) // 52.48 // q32.11 /// chr19:52937544-52938202 (+) // 36.8 // q13.32	EH-domain containing 2	EHD2	221870_at	0.131	0.2513	0.0663	0.1243	0.1603	0.2255	0.0909	0.2136	0.2352	0.1785	0.1777	0.1867	0.1507	0.0112	0.001	0.2774	0.1551	0.0797	0.0602	0.1989	0.0446	0.0496	0.0514	0.0287	-0.0358	0.0431	-0.0328	-0.0262	-0.0554
chr17:3512938-3518616 (-) // 96.58 // p13.3	Tax1 (human T-cell leukemia virus type I) binding protein 3	TAX1BP3	209154_at	0.0804	0.1113	0.066	0.1165	0.108	0.2233	0.0611	0.1237	0.1422	0.1461	0.1241	0.1537	0.1254	0.4394	0.3534	0.1066	0.155075	0.0244	0.0289	0.1001	0.0502	0.0505	0.053	0.0454	-0.0272	0.0397	0.159	0.1436	0.1874
chr3:52845791-52847583 (-) // 88.21 // p21.1	Transmembrane protein 110	TMEM110	227078_at	0.2448	0.2659	0.1477	0.2062	0.209	0.1761	0.0736	0.1651	0.2087	0.1809	0.2058	0.1858	0.1139	-0.0266	-0.0165	0.1397	0.155006	0.1646	0.1309	0.1746	0.0908	0.0916	0.0938	0.2124	0.0419	0.173	-0.0637	-0.0686	-0.0794
chr1:54786499-54877443 (+) // 31.73 // p32.3	acyl-CoA thioesterase 11	ACOT11	216103_at	0.1605	0.2004	0.1133	0.1923	0.103	0.0535	0.144	0.2067	0.2361	0.2151	0.2044	0.225	0.1492	0.1072	0.0759	0.093	0.154975	0.2108	0.1918	0.222	0.143	0.1453	0.1447	0.1319	0.1236	0.1413	0.0344	0.0504	0.0736
chr5:32091459-32094226 (+) // 88.68 // p13.3	PDZ domain containing 2	PDZD2	233025_at	0.1646	0.15	0.0963	0.2028	0.0801	0.0822	-0.0735	0.2412	0.2397	0.2843	0.2139	0.2894	0.1276	0.0892	0.0648	0.2219	0.154656	0.1656	0.1536	0.2432	0.0975	0.0993	0.1011	0.2039	0.0348	0.2078	0.0607	0.0627	0.0934
chr11:12742400-12916157 (+) // 95.85 // p15.2	TEA domain family member 1 (SV40 transcriptional enhancer factor)	TEAD1	214600_at	0.1845	0.2293	0.1595	0.1573	0.1167	0.2194	0.1339	0.1996	0.1384	0.1246	0.1387	0.1258	0.2238	0.1173	0.1087	0.0957	0.154575	0.0303	0.0881	0.1204	0.1459	0.1489	0.147	0.0878	0.0025	0.0885	-0.0601	-0.0465	-0.058
chr3:196903565-196904361 (+) // 71.84 // q29 /// chr5:319264-320258 (+) // 81.85 // p15.33 /// chr3:197167192-197167799 (-) // 74.59 // q29 /// chr3:198867509-198868109 (-) // 73.09 // q29 /// chr5:1688541-1689160 (-) // 74.59 // p15.33	Transcribed locus, moderately similar to XP_001175065.1 PREDICTED: hypothetical protein [Pan troglodytes]	---	235575_at	0.1634	0.1335	0.2574	0.1635	0.1825	0.0587	-0.0744	0.2917	0.1811	0.2054	0.1497	0.1967	0.2035	0.0343	0.1078	0.2178	0.154537	0.0872	0.1424	0.2164	0.159	0.1578	0.1582	0.2611	0.0926	0.2096	-0.0116	-0.0099	0.025
chr3:143925955-144009420 (+) // 97.58 // q23	transient receptor potential cation channel, subfamily C, member 1	TRPC1	205803_s_at	0.1615	0.2047	0.1255	0.1914	0.0676	0.1888	-0.0004	0.2623	0.2637	0.2692	0.2718	0.2641	0.1137	-0.0493	-0.0824	0.22	0.154513	0.1216	0.1626	0.2551	0.1783	0.1778	0.1784	0.1513	0.1086	0.1623	-0.1117	-0.1124	-0.1126
chr11:2661632-2662213 (-) // 99.83 // p15.5	KCNQ1 overlapping transcript 1 (non-protein coding)	KCNQ1OT1	243428_at	0.1731	0.1288	0.0813	0.1703	0.0981	0.0809	-0.0379	0.3089	0.2596	0.3157	0.2148	0.33	0.1468	0.0365	0.0264	0.1358	0.154319	0.1629	0.1378	0.1839	0.0717	0.0747	0.0751	0.1371	-0.0181	0.1307	0.1027	0.1065	0.1418
chr22:29011621-29015486 (-) // 97.04 // q12.2	TBC1 domain family, member 10A /// hypothetical protein LOC652968	LOC652968 /// TBC1D10A	233528_s_at	0.2288	0.2088	0.17	0.1757	0.2636	0.1473	0.0657	0.1588	0.1368	0.1582	0.1754	0.1399	0.1284	0.006	0.0871	0.2171	0.154225	0.0588	0.1587	0.1937	0.2321	0.2306	0.2336	0.1765	0.0105	0.1612	-0.0319	-0.0355	-0.0789
chr9:17125037-17289239 (+) // 85.12 // p22.2	centlein, centrosomal protein	CNTLN	1559005_s_at	0.1932	0.1958	0.1767	0.1644	0.0975	0.2104	0.06	0.2137	0.1728	0.2179	0.2131	0.1998	0.1592	-0.026	-0.018	0.2337	0.154013	0.0635	0.1453	0.1979	0.1852	0.1803	0.1808	0.2082	0.1737	0.2314	-0.0611	-0.0633	-0.0549
chr17:37226833-37232989 (+) // 99.05 // q21.2	FK506 binding protein 10, 65 kDa	FKBP10	219249_s_at	0.1494	0.1666	0.0883	0.153	0.1941	0.3228	0.1802	0.2017	0.2011	0.1811	0.18	0.1919	0.193	-0.0342	-0.0375	0.1311	0.153913	0.0433	0.0651	0.1035	0.0953	0.0949	0.097	0.0336	-0.0297	0.0395	0.0083	0.0123	0.009
chr8:1818228-1894212 (+) // 99.61 // p23.3	Rho guanine nucleotide exchange factor (GEF) 10	ARHGEF10	216620_s_at	0.1291	0.1334	0.1431	0.1796	0.1433	0.232	0.0172	0.249	0.2076	0.2573	0.2043	0.2505	0.1478	-0.0255	-0.0177	0.2115	0.153906	0.0614	0.1105	0.2058	0.1513	0.1479	0.1506	0.081	-0.0468	0.0763	-0.0547	-0.0558	-0.0473
chr3:180217708-180219957 (-) // 97.2 // q26.32	CDNA clone IMAGE:5261213	---	225725_at	0.1658	0.1624	0.1389	0.2157	0.2308	0.2153	-0.0191	0.19	0.2578	0.2377	0.2638	0.2355	0.1315	-0.0554	-0.0899	0.1816	0.1539	0.1888	0.2317	0.2995	0.2627	0.2594	0.2606	0.239	0.1089	0.2285	-0.1575	-0.1617	-0.181
chr22:31526807-31589027 (+) // 94.44 // q12.3	TIMP metallopeptidase inhibitor 3 (Sorsby fundus dystrophy, pseudoinflammatory)	TIMP3	201150_s_at	0.1881	0.2379	0.1283	0.1312	0.0879	0.1292	-0.0626	0.27	0.2407	0.2558	0.2029	0.2456	0.1122	-0.0273	-0.0157	0.3367	0.153806	0.1426	0.168	0.2906	0.1676	0.1735	0.1746	0.0703	-0.0295	0.0809	0.0377	0.0351	0.0463
chr3:180224220-180272277 (-) // 85.0 // q26.32	zinc finger, matrin type 3	ZMAT3	219628_at	0.187	0.1607	0.1486	0.1982	0.2552	0.2483	0.0314	0.1828	0.2109	0.2161	0.2342	0.2043	0.131	-0.0596	-0.0558	0.1675	0.1538	0.1401	0.2113	0.2619	0.2715	0.2652	0.2675	0.2133	0.1654	0.2279	-0.1388	-0.1414	-0.173
chr7:34160152-34160946 (+) // 99.13 // p14.3	BMP binding endothelial regulator	BMPER	241986_at	0.1267	0.1551	0.1243	0.17	0.1792	0.3624	0.104	0.1682	0.1934	0.1716	0.1916	0.174	0.1164	0.0183	-0.0001	0.2034	0.153656	0.0609	0.0897	0.1905	0.1038	0.1039	0.1066	0.1679	0.0332	0.1795	-0.0645	-0.0637	-0.0711
chr19:3045529-3072733 (+) // 78.16 // p13.3	guanine nucleotide binding protein (G protein), alpha 11 (Gq class)	GNA11	40562_at	0.1661	0.1821	0.1281	0.1584	0.1567	0.2031	0.0653	0.1179	0.1327	0.1102	0.1336	0.1076	0.0588	0.3079	0.2847	0.1429	0.153506	0.0866	0.1029	0.1396	0.092	0.09	0.0915	0.0953	-0.0401	0.103	0.0449	0.0258	0.0461
chrX:73342544-73343217 (-) // 57.57 // q13.2	CDNA FLJ42015 fis, clone SPLEN2032813	---	238918_at	0.1633	0.0973	0.0864	0.138	0.0913	0.0241	-0.1618	0.329	0.2514	0.3451	0.229	0.3371	0.1459	0.0876	0.0961	0.1949	0.153419	0.1569	0.1852	0.2628	0.172	0.1704	0.1732	0.2004	0.014	0.2008	0.1348	0.1256	0.1741
chr12:78508126-78608972 (-) // 85.07 // q21.2	PRKC, apoptosis, WT1, regulator	PAWR	204004_at	0.1134	0.0773	0.0336	0.151	0.1047	0.1951	0.0253	0.2121	0.1689	0.2218	0.1813	0.2248	0.14	0.3061	0.2665	0.0326	0.153406	0.0618	0.0968	0.1212	0.1073	0.1052	0.1084	0.0499	-0.0609	0.0634	0.208	0.1896	0.2326
chr4:144579093-144613351 (+) // 99.0 // q31.21	GRB2-associated binding protein 1	GAB1	225998_at	0.1407	0.1143	0.1462	0.189	0.1589	0.1192	-0.0325	0.1987	0.2189	0.2217	0.2313	0.214	0.1523	0.1225	0.1018	0.1573	0.153394	0.1304	0.2005	0.2298	0.2334	0.231	0.2331	0.2604	0.0517	0.2413	-0.0565	-0.0606	-0.0658
chr3:113806801-113842640 (-) // 94.9 // q13.2	coiled-coil domain containing 80	CCDC80	225241_at	0.1461	0.1687	0.1034	0.0853	0.1246	0.2131	0.054	0.3122	0.2152	0.2369	0.1808	0.2309	0.1492	-0.0134	0.0344	0.2126	0.153375	0.0268	0.0607	0.1634	0.0899	0.093	0.0935	0.0363	-0.0183	0.038	0.0074	0.0075	0.0008
chr9:27938075-27940669 (-) // 99.58 // p21.2	leucine rich repeat and Ig domain containing 2	LINGO2	232720_at	0.1445	0.1083	0.1378	0.1825	0.1947	0.0846	0.0625	0.2634	0.2463	0.2371	0.2461	0.2417	0.1997	-0.0071	-0.01	0.1182	0.153144	0.1752	0.1895	0.181	0.1393	0.1399	0.1402	0.2497	0.0889	0.2515	-0.0839	-0.0708	-0.0904
chr10:11061985-11067314 (+) // 68.87 // p14	MRNA; cDNA DKFZp547L156 (from clone DKFZp547L156)	---	233392_at	0.1875	0.1873	0.0949	0.172	0.1116	0.0658	-0.0683	0.2636	0.238	0.2899	0.2248	0.2875	0.1134	-0.0056	-0.0135	0.2995	0.153025	0.2631	0.253	0.3367	0.1751	0.1739	0.1753	0.1495	0.0235	0.1323	-0.0527	-0.0512	-0.0556
chr6:136556879-136557705 (+) // 64.25 // q23.3	phosphodiesterase 7B	PDE7B	243438_at	0.1426	0.1615	0.1342	0.1703	0.1763	0.0978	0.0991	0.2544	0.2367	0.2515	0.2171	0.241	0.1476	-0.0185	0.0039	0.1315	0.152938	0.0508	0.101	0.1489	0.1075	0.1078	0.1087	0.1081	0.0616	0.1376	-0.0609	-0.0536	-0.0565
chrX:150872251-150893807 (-) // 95.33 // q28	gamma-aminobutyric acid (GABA) A receptor, epsilon	GABRE	204537_s_at	0.1792	0.2463	0.1082	0.1608	0.0986	0.0785	-0.0687	0.1676	0.1859	0.1897	0.1751	0.1784	0.0881	0.152	0.1601	0.3467	0.152906	0.0911	0.1021	0.2693	0.1181	0.1216	0.1216	0.1635	0.0193	0.1929	0.025	0.0283	0.0377
chr5:122209086-122372799 (+) // 95.73 // q23.2	sorting nexin 24	SNX24	222716_s_at	0.1664	0.1383	0.122	0.209	0.1001	0.1971	0.0731	0.1976	0.1772	0.2235	0.1787	0.2288	0.1232	0.1066	0.0904	0.1143	0.152894	0.1286	0.154	0.196	0.1317	0.1304	0.1336	0.1515	0.0344	0.1647	0.077	0.0831	0.1132
chr1:1167691-1168771 (-) // 89.45 // p36.33	family with sequence similarity 132, member A	FAM132A	243292_at	0.1785	0.1895	0.0966	0.191	0.2744	0.1089	0.1336	0.1182	0.1747	0.1376	0.1581	0.1465	0.0961	0.1954	0.1798	0.0668	0.152856	0.3435	0.2521	0.2359	0.1983	0.2024	0.2028	0.1403	0.0272	0.1417	-0.0028	-0.0062	-0.0015
chr15:94675757-94683136 (+) // 89.93 // q26.2	nuclear receptor subfamily 2, group F, member 2	NR2F2	209119_x_at	0.1113	0.1359	0.1836	0.1349	0.1324	0.1251	0.0681	0.3328	0.229	0.2093	0.1913	0.2168	0.199	0.0029	0.0468	0.1262	0.152837	0.0722	0.0835	0.1501	0.0868	0.0914	0.0909	0.0649	-0.0027	0.0595	0.0182	0.0225	0.0355
chr2:38148155-38157214 (-) // 98.62 // p22.2	cytochrome P450, family 1, subfamily B, polypeptide 1	CYP1B1	202435_s_at	0.214	0.1939	0.1873	0.2237	0.1795	0.1594	0.0588	0.2044	0.1733	0.1889	0.1677	0.1818	0.1467	-0.008	0.014	0.1565	0.152619	0.1466	0.2124	0.2193	0.2308	0.2339	0.2332	0.1754	0.0524	0.1726	-0.0209	-0.0193	-0.0245
chr11:94244825-94249483 (+) // 86.17 // q21	angiomotin like 1	AMOTL1	225450_at	0.1884	0.2621	0.108	0.1745	0.0612	0.2038	0.0752	0.1746	0.1752	0.1875	0.1481	0.1882	0.1146	0.1338	0.0991	0.1468	0.152569	0.0518	0.0659	0.1435	0.077	0.0779	0.0792	0.0269	-0.0409	0.0391	-0.0688	-0.0591	-0.0587
chr17:39507875-39509238 (+) // 94.89 // q21.31	glucose 6 phosphatase, catalytic, 3	G6PC3	44654_at	0.2177	0.2407	0.1266	0.1985	0.1685	0.2837	0.0298	0.154	0.1727	0.1505	0.1689	0.155	0.1627	-0.0074	-0.0198	0.2379	0.1525	0.0914	0.0793	0.1397	0.0927	0.0936	0.0952	0.0911	-0.0737	0.0932	0.0237	0.0178	0.0108
chr2:172110574-172113698 (+) // 36.52 // q31.1	CDNA FLJ12174 fis, clone MAMMA1000707	---	232459_at	0.1533	0.2063	0.1455	0.151	0.1061	0.056	-0.0742	0.266	0.2523	0.2553	0.2143	0.2534	0.1232	-0.0007	-0.0001	0.3323	0.1525	0.1546	0.1562	0.2881	0.1113	0.115	0.1132	0.1688	0.1103	0.165	0.0327	0.0279	0.0629
chr8:57516066-57521767 (-) // 98.14 // q12.1	proenkephalin	PENK	213791_at	0.168	0.1642	0.1558	0.2246	0.1628	0.1586	0.0173	0.2036	0.211	0.2113	0.2374	0.2047	0.1338	0.0276	0.0419	0.1157	0.152394	0.1566	0.176	0.2077	0.1581	0.1582	0.162	0.1669	0.0368	0.186	-0.0557	-0.0504	-0.0609
chr7:150884959-151204788 (-) // 99.58 // q36.1	protein kinase, AMP-activated, gamma 2 non-catalytic subunit	PRKAG2	233748_x_at	0.1366	0.1115	0.1849	0.2116	0.2916	0.2268	0.104	0.1475	0.154	0.1515	0.1645	0.1313	0.159	0.0472	0.0612	0.1546	0.152363	0.0783	0.1503	0.2002	0.2168	0.2154	0.2197	0.2409	0.08	0.2726	-0.0884	-0.0853	-0.1153
chr3:9837255-9837719 (+) // 86.53 // p25.3	tubulin tyrosine ligase-like family, member 3	TTLL3	230872_s_at	0.1964	0.1333	0.1312	0.1912	0.1964	0.1183	-0.0209	0.2542	0.2307	0.254	0.2458	0.2469	0.1375	-0.0413	-0.011	0.1746	0.152331	0.1972	0.2185	0.2494	0.2296	0.2269	0.2274	0.1986	0.1009	0.1991	0.0127	0.0082	-0.0098
chr8:70706955-70707350 (+) // 75.55 // q13.3	Transcribed locus	---	241473_at	0.1761	0.1541	0.088	0.1695	0.1411	0.1166	-0.0529	0.2361	0.2485	0.2661	0.2235	0.2701	0.1634	0.0649	0.0417	0.1285	0.152206	0.218	0.2033	0.2287	0.1387	0.142	0.1415	0.1615	0.0264	0.1601	0.1126	0.1026	0.1382
chr7:33683877-33684350 (+) // 92.19 // p14.3	---	---	240865_at	0.2467	0.2059	0.0817	0.1812	0.0803	0.0426	-0.1187	0.2384	0.2264	0.2802	0.1879	0.2924	0.1109	0.1018	0.0805	0.197	0.1522	0.1641	0.1781	0.2662	0.1258	0.1259	0.1283	0.2024	0.0619	0.1537	0.1081	0.098	0.1532
chr2:38148155-38157214 (-) // 98.62 // p22.2	cytochrome P450, family 1, subfamily B, polypeptide 1	CYP1B1	202436_s_at	0.2069	0.1876	0.1605	0.2305	0.1751	0.1474	0.0559	0.2139	0.1929	0.2023	0.1767	0.2026	0.1545	-0.0219	-0.002	0.1517	0.152163	0.1604	0.207	0.2261	0.2139	0.2172	0.2175	0.1666	0.0518	0.1667	-0.0079	-0.0065	-0.0098
chr10:13775708-14090538 (-) // 96.68 // p13	FERM domain containing 4A	FRMD4A	208476_s_at	0.162	0.1407	0.2033	0.2028	0.2255	0.1521	0.0624	0.2192	0.1844	0.2242	0.1749	0.2199	0.1431	-0.0826	-0.0393	0.2416	0.152138	0.0869	0.1289	0.231	0.1332	0.13	0.1322	0.1652	0.0033	0.1456	-0.0797	-0.0841	-0.0741
chr17:38202127-38202608 (+) // 97.96 // q21.31	WNK lysine deficient protein kinase 4	WNK4	229158_at	0.1486	0.1399	0.1099	0.1781	0.1812	0.1847	-0.0199	0.1624	0.1925	0.1689	0.1787	0.1788	0.1104	0.2129	0.1814	0.1256	0.152131	0.1515	0.1319	0.1876	0.095	0.0995	0.0996	0.1899	0.0325	0.1749	0.1196	0.1029	0.1416
chr2:43821627-43824766 (+) // 97.96 // p21	pleckstrin homology domain containing, family H (with MyTH4 domain) member 2	PLEKHH2	239568_at	0.1381	0.1189	0.1715	0.1894	0.1197	0.0771	-0.0362	0.3138	0.216	0.2482	0.2019	0.2458	0.1888	0.0048	0.038	0.1979	0.152106	0.1238	0.1761	0.2211	0.2123	0.2117	0.21	0.1266	0.0165	0.1131	0.003	0.0032	0.0171
chr10:34440102-35143929 (-) // 97.24 // p11.22	par-3 partitioning defective 3 homolog (C. elegans)	PARD3	221280_s_at	0.2079	0.2047	0.1228	0.184	0.1311	0.203	0.1727	0.1041	0.1063	0.1308	0.1364	0.1194	0.0881	0.2311	0.2113	0.0789	0.152038	0.0173	0.0683	0.1067	0.0978	0.0948	0.0977	0.0882	-0.0345	0.0961	0.0584	0.0566	0.0525
chr3:135358667-135452280 (-) // 89.84 // q22.1	RYK receptor-like tyrosine kinase	RYK	202853_s_at	0.1392	0.2324	0.0953	0.1639	-0.0092	0.2333	0.0459	0.1884	0.2077	0.192	0.2051	0.1909	0.1054	0.1687	0.0863	0.1872	0.152031	0.0327	0.0546	0.1627	0.0718	0.0714	0.0724	0.0655	0.1547	0.0818	0.0489	0.0407	0.0746
chr3:61773565-61774041 (+) // 77.15 // p14.2	Transcribed locus	---	242188_at	0.1557	0.1629	0.1278	0.1706	0.1248	0.041	-0.1125	0.3216	0.2657	0.2959	0.2152	0.2962	0.1524	-0.0104	-0.0013	0.2259	0.151969	0.2879	0.2251	0.2818	0.1454	0.1544	0.1536	0.1398	-0.0143	0.1553	0.036	0.0431	0.0719
chr1:64716876-64717246 (+) // 33.07 // p31.3	---	---	243416_at	0.1788	0.1525	0.1131	0.1596	0.0615	0.0352	-0.0671	0.2881	0.2342	0.2769	0.2183	0.2793	0.1395	0.0797	0.0734	0.2085	0.151969	0.1012	0.1053	0.2011	0.0543	0.0576	0.0578	0.1331	0.0054	0.1242	0.1154	0.108	0.1654
chr8:145917100-145950995 (-) // 95.39 // q24.3	zinc finger protein 251	ZNF251	226754_at	0.1901	0.1722	0.1342	0.1896	0.1045	0.1755	-0.065	0.2286	0.2209	0.2687	0.2196	0.2599	0.1373	0.0094	-0.0153	0.1997	0.151869	0.1121	0.1461	0.2225	0.1491	0.1462	0.148	0.2131	0.027	0.1588	0.1269	0.1136	0.1659
chr12:13240986-13241975 (+) // 65.96 // p13.1	epithelial membrane protein 1	EMP1	1564796_at	0.1436	0.1446	0.1741	0.1775	0.1153	0.1042	-0.0265	0.2141	0.1835	0.1843	0.1606	0.1817	0.1478	0.1331	0.1883	0.2037	0.151869	0.17	0.1802	0.2466	0.1628	0.1641	0.1645	0.1395	0.0233	0.1706	-0.0087	-0.0005	0.0024
chr1:31890434-31942143 (-) // 95.99 // p35.2	collagen, type XVI, alpha 1	COL16A1	204345_at	0.0956	0.0921	0.1354	0.116	0.0601	0.1383	0.0055	0.3308	0.2523	0.3045	0.2099	0.3083	0.1502	0.0566	0.0627	0.1101	0.151775	0.0427	0.0576	0.1174	0.0424	0.0429	0.0437	0.0252	-0.0424	0.0297	0.0642	0.0605	0.0984
chr6:1569077-2190730 (-) // 99.93 // p25.3	GDP-mannose 4,6-dehydratase	GMDS	204875_s_at	0.138	0.1124	0.2009	0.213	0.1418	0.0868	0.0048	0.0673	0.1123	0.1011	0.1184	0.0931	0.0597	0.477	0.4467	0.0549	0.151762	0.0855	0.1315	0.1196	0.149	0.1458	0.1473	0.1591	0.0087	0.156	0.186	0.1445	0.1452
chr3:30020655-30021623 (+) // 94.96 // p24.1	RNA binding motif, single stranded interacting protein	RBMS3	238447_at	0.1468	0.1843	0.1314	0.1377	0.0642	0.1063	-0.0378	0.3386	0.2459	0.2794	0.1806	0.2817	0.1307	-0.062	-0.0385	0.3384	0.151731	0.0955	0.1126	0.2728	0.0934	0.0974	0.0978	0.0561	-0.0243	0.0477	-0.0484	-0.0456	-0.029
chr11:2355128-2375202 (+) // 86.5 // p15.5	CD81 molecule	CD81	200675_at	0.1312	0.1694	0.1359	0.1651	0.1139	0.1272	-0.1026	0.2915	0.2733	0.2522	0.2336	0.2517	0.1538	-0.0427	-0.0105	0.2846	0.151725	0.1683	0.1628	0.2789	0.1494	0.1568	0.1585	0.0846	-0.065	0.0878	0.0808	0.0776	0.0534
chr5:7277135-7278076 (-) // 44.29 // p15.31	CDNA clone IMAGE:5314388	---	1556805_at	0.1408	0.1482	0.1112	0.1866	0.1504	0.0534	0.1156	0.2215	0.2347	0.2484	0.1852	0.2654	0.1567	0.0267	0.0221	0.1597	0.151662	0.2288	0.2402	0.2698	0.1641	0.1663	0.1666	0.1358	0.0572	0.1272	0.0549	0.0746	0.0869
chr5:39407532-39461088 (-) // 99.31 // p13.1	disabled homolog 2, mitogen-responsive phosphoprotein (Drosophila)	DAB2	201278_at	0.1003	0.1237	0.1085	0.1715	0.2038	0.1931	0.0408	0.2447	0.2414	0.2398	0.2133	0.2437	0.1956	-0.0455	-0.0562	0.207	0.151594	0.1007	0.12	0.2245	0.1497	0.1513	0.1525	0.0889	0.0072	0.1009	-0.0454	-0.0438	-0.0375
---	---	---	244112_x_at	0.202	0.1714	0.1068	0.2071	0.0918	0.0943	-0.0672	0.2453	0.2311	0.2911	0.2367	0.2981	0.1224	0.0167	-0.0085	0.185	0.151506	0.1333	0.1495	0.2144	0.0986	0.0985	0.0997	0.2001	0.0287	0.1794	-0.039	-0.0418	-0.0251
chr12:49605068-49612555 (+) // 89.79 // q13.13	methyltransferase like 7A	METTL7A	207761_s_at	0.2271	0.2518	0.1772	0.1906	0.16	-0.0019	-0.1193	0.1907	0.1984	0.2236	0.1921	0.2048	0.0565	0.0816	0.0872	0.3011	0.151344	0.1753	0.2613	0.3956	0.2619	0.264	0.2657	0.2195	0.0768	0.2248	-0.0007	-0.0166	0.0099
chr5:122909226-122979039 (+) // 99.79 // q23.2	casein kinase 1, gamma 3	CSNK1G3	220768_s_at	0.1326	0.1519	0.1214	0.1872	0.1411	0.3493	0.0997	0.0862	0.134	0.1234	0.1953	0.1102	0.1278	0.221	0.1335	0.1068	0.151338	0.0221	0.0915	0.1435	0.172	0.1653	0.1699	0.1554	0.0619	0.1661	-0.0568	-0.0753	-0.096
chr8:91962464-92037383 (+) // 96.96 // q21.3	N-terminal EF-hand calcium binding protein 1	NECAB1	233305_at	0.1796	0.1541	0.2105	0.2198	0.2471	0.1449	0.0329	0.1723	0.1633	0.1754	0.2051	0.1525	0.133	0.0051	0.0341	0.1904	0.151256	0.1021	0.2046	0.2376	0.2814	0.2839	0.2821	0.315	0.0949	0.3552	-0.0824	-0.0773	-0.0895
chr13:20446578-20533654 (-) // 97.8 // q12.11	LATS, large tumor suppressor, homolog 2 (Drosophila)	LATS2	223380_s_at	0.1312	0.1118	0.0731	0.1683	0.1307	0.1486	0.0458	0.2627	0.2172	0.2478	0.1988	0.2688	0.1956	0.0177	0.0196	0.1821	0.151238	0.0931	0.1184	0.1905	0.114	0.1153	0.1183	0.1367	0.0535	0.13	-0.0377	-0.0275	-0.0225
chr10:18590195-18868666 (+) // 98.95 // p12.33	calcium channel, voltage-dependent, beta 2 subunit	CACNB2	1555098_a_at	0.1765	0.1207	0.173	0.1813	0.3075	0.107	0.1497	0.1798	0.1746	0.178	0.2059	0.1559	0.1493	0.0042	0.0501	0.1053	0.151175	0.146	0.2464	0.1852	0.2363	0.2351	0.237	0.2533	0.084	0.2637	-0.0954	-0.0828	-0.1072
chr18:14169485-14205540 (+) // 97.78 // p11.21 /// chr22_random:194304-233803 (+) // 95.33 // /// chr9:67516784-67552028 (+) // 95.78 // q12 /// chr9:68672004-68707281 (+) // 95.56 // q12 /// chr9:42358502-42393760 (+) // 95.33 // p12 /// chr2:94851219-94886541 (-) // 91.78 // q11.1 /// chr21:14237973-14274004 (-) // 100.0 // q11.2 /// chr9:43088066-43123336 (-) // 95.56 // p11.2 /// chr9:4402301…	chromosome 21 open reading frame 81	C21orf81	241233_x_at	0.1699	0.1526	0.1776	0.2271	0.1411	0.0784	-0.0049	0.2327	0.1787	0.2195	0.1489	0.2276	0.1519	0.0573	0.1223	0.1376	0.151144	0.221	0.2652	0.3158	0.2692	0.2699	0.265	0.2101	0.0818	0.2029	0.0094	0.0193	0.0329
---	CDNA clone IMAGE:4798264	---	1570191_at	0.2004	0.1769	0.0957	0.1932	0.1033	0.0872	-0.0267	0.2308	0.2335	0.2878	0.2067	0.296	0.1127	0.046	0.0304	0.1437	0.1511	0.1612	0.1503	0.2099	0.1028	0.1061	0.1055	0.1657	0.038	0.1657	0.0755	0.0939	0.1267
chr1:61338063-61339655 (+) // 54.92 // p31.3	CDNA FLJ11855 fis, clone HEMBA1006780	---	233004_x_at	0.2289	0.2135	0.1562	0.1714	0.0585	0.0026	-0.1145	0.2818	0.2064	0.2834	0.1742	0.2735	0.0927	0.0387	0.0528	0.2967	0.15105	0.199	0.2252	0.3347	0.1893	0.1886	0.1885	0.1688	0.0605	0.1557	0.0909	0.0918	0.1554
chr8:22078863-22125782 (+) // 99.49 // p21.3	bone morphogenetic protein 1	BMP1	202701_at	0.1008	0.0932	0.0852	0.1341	0.1617	0.1908	0.0779	0.234	0.1992	0.2067	0.1685	0.2102	0.1758	0.1202	0.1191	0.1366	0.150875	0.1125	0.1012	0.1442	0.0873	0.093	0.0948	0.0587	-0.0611	0.0691	0.0503	0.0598	0.0422
chr19:3045529-3072451 (+) // 87.6 // p13.3	guanine nucleotide binding protein (G protein), alpha 11 (Gq class)	GNA11	564_at	0.1649	0.1797	0.1269	0.1499	0.1679	0.1949	0.038	0.126	0.13	0.1067	0.1313	0.1023	0.0637	0.2973	0.2909	0.1424	0.1508	0.0852	0.0937	0.1295	0.0871	0.0862	0.0878	0.0829	-0.069	0.0928	0.0506	0.0306	0.0393
chr1:201724661-201725366 (+) // 77.47 // q32.1	proline/arginine-rich end leucine-rich repeat protein	PRELP	228224_at	0.1274	0.1689	0.1357	0.1494	0.0755	0.045	-0.0687	0.2953	0.2615	0.2527	0.2263	0.2505	0.1465	0.0131	0.0292	0.3043	0.150787	0.1388	0.1432	0.2489	0.1122	0.1187	0.1198	0.1	0.0025	0.118	-0.0186	-0.0104	-0.0128
chr15:98329160-98699650 (-) // 91.71 // q26.3	ADAM metallopeptidase with thrombospondin type 1 motif, 17	ADAMTS17	1552726_at	0.1061	0.1029	0.1321	0.158	0.1985	0.1227	0.0171	0.1966	0.2164	0.2171	0.2322	0.2075	0.2774	0.0461	0.0499	0.1319	0.150781	0.0892	0.0887	0.1552	0.1137	0.1121	0.1154	0.1317	0.1848	0.1409	-0.0373	-0.0295	-0.044
chr5:155704075-156119316 (+) // 91.98 // q33.3	sarcoglycan, delta (35kDa dystrophin-associated glycoprotein)	SGCD	214492_at	0.2279	0.2513	0.0756	0.1025	0.1305	0.2338	0.0946	0.2005	0.2206	0.1919	0.2378	0.1955	0.2106	-0.0287	-0.0265	0.094	0.150744	0.0703	0.0983	0.1121	0.1102	0.1126	0.1129	0.0764	0.0057	0.0829	-0.0373	-0.0274	-0.0419
chr9:103275275-103277127 (-) // 72.84 // q31.1	chromosome 9 open reading frame 125	C9orf125	213386_at	0.1826	0.1689	0.1602	0.2296	0.1924	0.1599	-0.0701	0.1613	0.1893	0.1763	0.2024	0.1695	0.1101	0.114	0.1043	0.1608	0.150719	0.1719	0.1734	0.2095	0.1631	0.1657	0.1679	0.2078	0.0146	0.2177	-0.0809	-0.077	-0.1026
chr13:76462795-76474652 (+) // 86.05 // q22.3	ceroid-lipofuscinosis, neuronal 5	CLN5	204084_s_at	0.1533	0.1743	0.1977	0.1898	0.1375	0.1629	-0.0329	0.1932	0.1672	0.1695	0.1648	0.16	0.1473	0.1483	0.1233	0.1538	0.150625	0.0795	0.151	0.229	0.214	0.2143	0.2167	0.1398	0.1336	0.15	0.0189	0.0105	0.0163
chr13:99964960-99969291 (+) // 97.37 // q32.3	Propionyl Coenzyme A carboxylase, alpha polypeptide	PCCA	216533_at	0.1372	0.0937	0.1043	0.1443	0.1911	0.1204	0.1395	0.1695	0.2002	0.2106	0.2426	0.1937	0.2174	0.0725	0.0826	0.0901	0.150606	0.0699	0.1482	0.1421	0.1867	0.1755	0.1798	0.1477	0.119	0.1637	-0.0307	-0.0346	-0.0274
chr3:61762280-61762740 (+) // 48.59 // p14.2	---	---	242416_at	0.1168	0.0918	0.1223	0.1626	0.1115	0.0419	-0.0704	0.37	0.2818	0.2907	0.2157	0.3052	0.2492	-0.0255	0.0052	0.1402	0.150563	0.2738	0.2035	0.2271	0.1157	0.1282	0.1272	0.1268	-0.0148	0.1364	0.0351	0.059	0.0656
chr4:184442377-184475318 (+) // 98.98 // q35.1	WW and C2 domain containing 2	WWC2	218775_s_at	0.1745	0.152	0.0779	0.1611	0.1031	0.2204	0.0406	0.2616	0.1843	0.2485	0.1937	0.2572	0.1695	-0.014	-0.0253	0.2029	0.1505	0.0682	0.1011	0.1819	0.1158	0.1148	0.1174	0.0846	-0.0415	0.0796	0.0243	0.0231	0.0458
chr9:95980997-95981767 (+) // 99.09 // q22.32	---	---	227793_at	0.1497	0.1566	0.1651	0.2267	0.1078	0.1238	-0.1625	0.2246	0.246	0.2645	0.2586	0.2584	0.1476	0.0578	0.0165	0.166	0.15045	0.1585	0.1605	0.2594	0.1621	0.1628	0.1629	0.2618	0.2438	0.3114	0.0311	0.0306	0.0634
chr17:63929017-63965221 (-) // 99.95 // q24.2	WD repeat domain, phosphoinositide interacting 1	WIPI1	203827_at	0.2186	0.2511	0.1127	0.1382	0.1722	0.2193	0.0695	0.1278	0.1423	0.1582	0.1688	0.1445	0.1136	0.1151	0.0907	0.164	0.150413	0.0248	0.0572	0.1586	0.1156	0.1112	0.1151	0.1341	0.0514	0.1503	0.0292	0.0082	0.0181
chr5:72341926-72342458 (+) // 29.03 // q13.2	Full length insert cDNA YU76C01	---	1565976_at	0.1576	0.1303	0.1545	0.1588	0.0717	0.0548	-0.0935	0.2794	0.1996	0.2707	0.1834	0.262	0.1297	0.1143	0.1207	0.211	0.150312	0.18	0.1879	0.2744	0.1531	0.1534	0.1558	0.1769	0.0441	0.1694	0.053	0.0606	0.0902
chr1:68336739-68388627 (-) // 79.25 // p31.3	G protein-coupled receptor 177	GPR177	228949_at	0.1214	0.1457	0.1267	0.1744	0.1185	0.1877	-0.0016	0.2021	0.2129	0.2265	0.1887	0.223	0.1564	0.105	0.0625	0.1543	0.150263	0.0835	0.1421	0.2339	0.1936	0.1924	0.1936	0.0852	-0.012	0.0757	-0.0167	-0.0264	0.0007
chr1:32469847-32473216 (-) // 84.65 // p35.1	hypothetical LOC339483	LOC339483	228593_at	0.1463	0.1547	0.1585	0.1439	0.1433	0.0023	-0.0307	0.309	0.2534	0.272	0.2148	0.278	0.1832	-0.0127	0.0068	0.1807	0.150219	0.2082	0.2038	0.2566	0.1584	0.1659	0.1647	0.0962	-0.0299	0.0881	0.0363	0.0396	0.0756
chr1:200022191-200061078 (+) // 95.64 // q32.1	neuron navigator 1	NAV1	224773_at	0.1545	0.2035	0.0881	0.1569	0.2087	0.3741	0.1386	0.1577	0.1556	0.1596	0.1614	0.1556	0.134	-0.023	-0.0267	0.2044	0.150188	0.011	0.0257	0.1168	0.0559	0.0543	0.0572	0.0847	-0.0215	0.0859	-0.0763	-0.0743	-0.0853
chr14:60817619-60818116 (-) // 95.18 // q23.1	transmembrane protein 30B	TMEM30B	230471_at	0.2124	0.1841	0.1916	0.1872	0.3237	0.0676	0.4367	0.1194	0.0985	0.0863	0.0905	0.0692	0.1545	0.051	0.0899	0.0401	0.150169	0.0669	0.227	0.1523	0.3145	0.3117	0.3115	0.1636	0.0796	0.1691	-0.0257	-0.0225	-0.0374
chr20:44563137-44575600 (-) // 99.88 // q13.12	zinc finger protein 334	ZNF334	220022_at	0.1763	0.1574	0.1508	0.1979	0.1437	0.166	-0.0517	0.2147	0.2102	0.2316	0.2358	0.2308	0.124	0.0269	0.0167	0.168	0.149944	0.1395	0.1761	0.2111	0.1839	0.183	0.1832	0.1821	0.0237	0.192	-0.0407	-0.0388	-0.0298
chr10:24840195-24842722 (+) // 68.58 // p12.1	KIAA1217	KIAA1217	232046_at	0.1669	0.1189	0.1297	0.1591	0.0871	-0.0023	-0.0728	0.2552	0.1902	0.2658	0.1458	0.2713	0.1566	0.1906	0.2209	0.1152	0.149888	0.136	0.1486	0.1956	0.0889	0.0907	0.0924	0.1666	-0.0015	0.1522	0.2766	0.2761	0.3657
chr17:1909314-1909731 (+) // 88.29 // p13.3	hypermethylated in cancer 1	HIC1	230218_at	0.1104	0.1305	0.0929	0.1344	0.1825	0.1378	0.028	0.2693	0.2669	0.2314	0.2298	0.2421	0.1724	-0.0153	0.0043	0.1798	0.149825	0.1046	0.0951	0.1859	0.0928	0.0993	0.101	0.094	-0.0027	0.0969	-0.0124	-0.0101	-0.0223
chr9:72189332-72219360 (-) // 95.2 // q21.11	Kruppel-like factor 9	KLF9	203542_s_at	0.1823	0.1467	0.2081	0.2255	0.1944	0.0721	0.0387	0.2477	0.1947	0.2152	0.1817	0.2156	0.1583	-0.0527	0.0059	0.1625	0.149794	0.1691	0.2608	0.307	0.2725	0.2752	0.2754	0.2586	0.1531	0.2412	-0.078	-0.0663	-0.0797
chr7:134114915-134305231 (+) // 94.06 // q33	caldesmon 1	CALD1	201616_s_at	0.0833	0.0776	0.0558	0.1103	0.1338	0.2597	0.1061	0.3241	0.2221	0.2638	0.2057	0.2735	0.2005	-0.015	-0.0025	0.0973	0.149756	0.0217	0.0724	0.1307	0.1169	0.1148	0.1186	0.0101	-0.0445	0.0168	-0.0139	-0.0135	-0.0078
chr20:10566624-10602590 (-) // 96.99 // p12.2	jagged 1 (Alagille syndrome)	JAG1	209099_x_at	0.0874	0.1036	0.108	0.1886	0.0918	0.1332	0.0226	0.1638	0.1601	0.1791	0.15	0.1786	0.1006	0.3321	0.2465	0.1497	0.149731	0.0569	0.0787	0.1711	0.0938	0.0947	0.0963	0.0867	0.0001	0.1105	0.0505	0.0486	0.0874
chr11:113439157-113626587 (+) // 98.91 // q23.2	zinc finger and BTB domain containing 16	ZBTB16	205883_at	0.2555	0.2806	0.1513	0.1731	0.1633	0.0379	-0.0375	0.2328	0.2317	0.2227	0.2177	0.2115	0.1066	-0.0646	-0.0257	0.2382	0.149694	0.2825	0.2927	0.3189	0.2057	0.2119	0.2113	0.2301	0.0487	0.2339	-0.112	-0.1	-0.1196
chr12:55914954-55917144 (-) // 98.61 // q13.3	NADH dehydrogenase (ubiquinone) 1 alpha subcomplex, 4-like 2	NDUFA4L2	218484_at	0.1444	0.13	0.161	0.2196	0.2017	0.1382	0.0383	0.1596	0.1643	0.1853	0.1553	0.185	0.1105	0.1094	0.1175	0.1748	0.149681	0.0764	0.0969	0.1776	0.1026	0.1037	0.107	0.1803	0.0312	0.1778	-0.0043	-0.003	0
chrX:71758873-71759335 (-) // 100.0 // q13.1	Transcribed locus	---	244327_at	0.2567	0.2522	0.2388	0.1992	0.2095	0.0684	0.0901	0.1854	0.1364	0.1334	0.1175	0.1248	0.1919	0.0022	0.067	0.1212	0.149669	0.1214	0.1866	0.1801	0.1763	0.1765	0.1756	0.2353	0.0563	0.1987	-0.0468	-0.0331	-0.022
chr17:26375328-26383714 (+) // 90.98 // q11.2	hypothetical LOC400590	LOC400590	1560994_x_at	0.2022	0.1783	0.1745	0.197	0.194	0.1012	0.1604	0.1721	0.1611	0.1956	0.177	0.1826	0.1069	0.0191	0.0249	0.1477	0.149662	0.0988	0.2283	0.243	0.2854	0.2801	0.2774	0.2075	0.2529	0.221	-0.0023	-0.0034	0.0264
chr3:150717711-150903750 (-) // 90.01 // q25.1	WW domain containing transcription regulator 1	WWTR1	202132_at	0.122	0.1463	0.156	0.1823	0.1796	0.1911	0.0648	0.2244	0.182	0.1789	0.1792	0.1884	0.2363	0.0041	0.0227	0.1355	0.1496	0.031	0.0694	0.1201	0.1055	0.1057	0.108	0.075	-0.0127	0.0869	-0.0333	-0.0335	-0.0438
chr7:129919172-129933369 (+) // 98.14 // q32.2	mesoderm specific transcript homolog (mouse)	MEST	202016_at	0.2868	0.3133	0.0904	0.1449	0.1126	0.1374	0.0309	0.1382	0.1365	0.1576	0.1362	0.1443	0.0785	0.0035	-0.0081	0.4888	0.149488	0.0406	0.0823	0.1722	0.1273	0.1246	0.1256	0.0526	-0.0278	0.0519	-0.0291	-0.0319	-0.0276
chr17:45010955-45016188 (+) // 89.49 // q21.33	neurexophilin 3	NXPH3	221991_at	0.135	0.1221	0.1393	0.2112	0.2096	0.0716	0.0791	0.2472	0.2485	0.2106	0.2318	0.2205	0.1645	-0.0156	0.0061	0.1092	0.149419	0.142	0.1201	0.1667	0.0537	0.0621	0.0601	0.1568	-0.0451	0.2219	-0.0176	0.0047	-0.0157
chr11:64376783-64402757 (-) // 88.23 // q13.1	EH-domain containing 1	EHD1	208112_x_at	0.1804	0.1492	0.1335	0.2197	0.3133	0.1752	0.0723	0.1477	0.1892	0.1772	0.1812	0.1832	0.1371	0.0003	-0.0099	0.1399	0.149344	0.2202	0.2056	0.2449	0.1696	0.1747	0.1741	0.2943	0.0948	0.2494	-0.1117	-0.1057	-0.1242
chr1:61362745-61369908 (+) // 66.43 // p31.3	KIAA0485 protein	KIAA0485	214295_at	0.2176	0.1823	0.1033	0.1909	0.0797	0.0309	-0.1436	0.2582	0.228	0.2944	0.1877	0.2946	0.0983	0.0614	0.0568	0.2485	0.149312	0.2354	0.2405	0.3344	0.1967	0.1947	0.1953	0.1608	-0.0005	0.149	0.2116	0.1968	0.2743
chr6:160689414-160793593 (+) // 99.0 // q25.3	solute carrier family 22 (extraneuronal monoamine transporter), member 3	SLC22A3	205421_at	0.1547	0.1808	0.2618	0.2207	0.1314	0.0943	-0.0145	0.1769	0.1651	0.1804	0.1652	0.1753	0.1046	0.125	0.0806	0.184	0.149144	0.0909	0.1634	0.2303	0.1632	0.1621	0.1652	0.1616	0.0393	0.1578	-0.051	-0.0466	-0.0536
chr1:200018380-200031320 (+) // 34.73 // q32.1	neuron navigator 1	NAV1	233870_at	0.176	0.1796	0.0987	0.1665	0.1501	0.1281	-0.0499	0.2307	0.1917	0.2404	0.1883	0.2306	0.1657	-0.006	0.0228	0.273	0.149144	0.1101	0.1022	0.1974	0.0792	0.0833	0.0837	0.1886	-0.0144	0.1773	-0.0162	0.003	-0.0038
chr7:100302909-100309006 (+) // 97.61 // q22.1	thyroid hormone receptor interactor 6	TRIP6	209129_at	0.1126	0.1234	0.1099	0.171	0.0934	0.3178	0.1135	0.1626	0.1417	0.1451	0.1499	0.151	0.1753	0.1621	0.1611	0.0958	0.149138	0.0141	0.0285	0.0672	0.0555	0.0552	0.0574	-0.0231	-0.0825	-0.0123	0.1442	0.1338	0.1024
chr11:6599129-6600129 (-) // 99.79 // p15.4	dachsous 1 (Drosophila)	DCHS1	218892_at	0.0705	0.0549	0.0651	0.1318	0.1871	0.0724	0.0071	0.3434	0.3345	0.282	0.2801	0.3051	0.227	-0.0697	-0.0521	0.1444	0.148975	0.1529	0.1118	0.1629	0.067	0.075	0.0757	0.0936	-0.0171	0.1039	-0.0291	-0.0199	-0.0408
chr6:56576527-56615647 (-) // 99.01 // p12.1	dystonin	DST	1553191_at	0.2175	0.2161	0.2279	0.1576	0.2637	0.2258	0.1552	0.1579	0.1116	0.1222	0.122	0.1029	0.1459	-0.0201	0.0372	0.1398	0.14895	0.0215	0.1414	0.158	0.2471	0.2504	0.253	0.1525	0.0545	0.1333	-0.0724	-0.0686	-0.0803
chr7:18960293-19002328 (+) // 100.0 // p21.1	histone deacetylase 9	HDAC9	234393_at	0.2179	0.2122	0.2311	0.1954	0.2118	0.1298	0.1775	0.1499	0.1355	0.1343	0.1393	0.1116	0.2064	-0.0057	-0.0007	0.1364	0.148919	0.1163	0.2753	0.2615	0.3853	0.3878	0.3825	0.1596	0.0764	0.1318	-0.0735	-0.0611	-0.0806
chr11:64376783-64402767 (-) // 95.44 // q13.1	EH-domain containing 1	EHD1	209038_s_at	0.1695	0.1488	0.1281	0.2071	0.3436	0.2086	0.1061	0.1362	0.1697	0.1344	0.1857	0.137	0.1798	-0.0038	0.0181	0.1135	0.1489	0.2219	0.2211	0.2207	0.2124	0.2164	0.2176	0.2009	0.0527	0.1983	-0.1154	-0.1042	-0.1592
chr12:55273400-55275650 (+) // 84.44 // q13.3	CDNA FLJ39093 fis, clone NT2RP7020112	---	225778_at	0.1117	0.1599	0.0813	0.1486	0.1529	0.1983	0.0954	0.1778	0.181	0.1502	0.1483	0.1529	0.1483	0.1561	0.1277	0.1904	0.1488	0.0737	0.0734	0.1539	0.0887	0.0892	0.0916	0.037	-0.0267	0.0516	0.0123	0.0129	-0.0087
chr14:74667925-74670177 (-) // 63.78 // q24.3	transmembrane emp24-like trafficking protein 10 (yeast)	TMED10	212352_s_at	0.1831	0.2079	0.1542	0.1516	0.0743	0.1557	-0.133	0.1662	0.1965	0.223	0.2008	0.2098	0.0753	0.1986	0.13	0.1857	0.148731	0.0774	0.1278	0.2268	0.1848	0.1838	0.1865	0.1688	0.0482	0.1661	0.1943	0.1548	0.2081
chr19:53577646-53586610 (-) // 97.73 // q13.32	KDEL (Lys-Asp-Glu-Leu) endoplasmic reticulum protein retention receptor 1	KDELR1	1555575_a_at	0.1208	0.1669	0.1292	0.1936	0.0782	0.206	0.0136	0.1632	0.1915	0.1518	0.1549	0.1703	0.1253	0.2311	0.1913	0.0919	0.148725	0.1065	0.0725	0.129	0.0629	0.0682	0.0693	0.028	0.0306	0.0556	0.2367	0.2183	0.2254
chr22:40803805-40805387 (+) // 92.17 // q13.2	family with sequence similarity 109, member B	FAM109B	226504_at	0.0854	0.0855	0.1204	0.1365	0.1313	0.1404	-0.0627	0.2552	0.2428	0.232	0.1944	0.2475	0.2078	0.1511	0.1515	0.0595	0.148663	0.0892	0.0602	0.1034	0.0383	0.0453	0.0465	0.0381	-0.0627	0.0458	0.2011	0.1973	0.2198
chrX:73415103-73429160 (-) // 64.22 // q13.2	CDNA clone IMAGE:4328048	---	1558515_at	0.1518	0.1154	0.1948	0.1291	0.1257	0.01	-0.1598	0.3671	0.2235	0.269	0.1919	0.2609	0.2264	0.0078	0.0781	0.1862	0.148619	0.1503	0.1771	0.2321	0.1806	0.1822	0.1818	0.2171	0.2608	0.2242	0.0004	0.0101	0.0247
chr4:184440753-184474071 (+) // 97.14 // q35.1	WW and C2 domain containing 2	WWC2	1554762_a_at	0.1435	0.1265	0.1019	0.1709	0.1658	0.2701	0.099	0.2551	0.1773	0.1734	0.1743	0.188	0.2473	-0.0411	-0.0139	0.1397	0.148612	0.0634	0.0879	0.138	0.1227	0.1252	0.1276	0.0517	-0.0552	0.0589	-0.0297	-0.0184	-0.0432
chr10:129094325-129097143 (+) // 87.31 // q26.2	Dedicator of cytokinesis 1	DOCK1	232930_at	0.1495	0.1395	0.1795	0.166	0.1293	0.0202	0.0015	0.2613	0.1962	0.2143	0.1418	0.2219	0.1662	0.0724	0.1222	0.1944	0.148512	0.1371	0.1571	0.2094	0.1211	0.1211	0.1191	0.1438	-0.0004	0.1078	0.0255	0.0301	0.0746
chr15:70327680-70328152 (-) // 68.01 // q23	Transcribed locus	---	241867_at	0.1569	0.1202	0.1552	0.1803	0.0863	0.0566	-0.1816	0.3236	0.2587	0.3223	0.2419	0.3217	0.1763	-0.0483	-0.0209	0.2249	0.148381	0.1799	0.1703	0.2583	0.1284	0.1291	0.1295	0.2929	0.0916	0.2321	0.0308	0.0287	0.0706
chr10:128584059-129140569 (+) // 98.8 // q26.2	dedicator of cytokinesis 1	DOCK1	203187_at	0.1147	0.1354	0.1136	0.1756	0.1174	0.1869	-0.0974	0.2587	0.2423	0.2032	0.1874	0.2116	0.1931	0.0765	0.0854	0.1689	0.148331	0.1292	0.0975	0.1551	0.1041	0.1101	0.1122	0.0106	-0.09	0.0425	0.0725	0.0704	0.0455
chr7:134114940-134304637 (+) // 93.18 // q33	caldesmon 1	CALD1	201617_x_at	0.075	0.1007	0.041	0.1006	0.1111	0.2811	0.095	0.284	0.2431	0.2516	0.2487	0.2556	0.1935	-0.0102	-0.0248	0.1265	0.148281	0.0343	0.0795	0.1523	0.1223	0.1226	0.1262	0.0046	-0.034	0.0242	-0.0266	-0.0253	-0.0339
chr5:66498775-66501664 (+) // 94.5 // q12.3	microtubule associated serine/threonine kinase family member 4 /// hypothetical protein LOC100128443	LOC100128443 /// MAST4	225611_at	0.1323	0.1681	0.1423	0.1864	0.1268	0.0471	-0.0324	0.1808	0.1909	0.1838	0.1628	0.1775	0.0881	0.1947	0.1967	0.2256	0.148219	0.09	0.1105	0.2063	0.0899	0.0911	0.0918	0.1464	0.0747	0.1611	0.0118	0.011	0.0258
chr1:94767460-94779903 (-) // 84.35 // p21.3	coagulation factor III (thromboplastin, tissue factor)	F3	204363_at	0.1275	0.2005	0.1081	0.1974	0.0772	0.2201	0.1287	0.095	0.1319	0.1054	0.1464	0.1066	0.0809	0.3091	0.2393	0.0973	0.148213	0.0946	0.1032	0.16	0.0959	0.0971	0.0981	0.1286	0.0373	0.1486	0.064	0.0629	0.0435
chr5:38510821-38512867 (-) // 96.03 // p13.1	leukemia inhibitory factor receptor alpha	LIFR	225571_at	0.178	0.1751	0.1772	0.2153	0.124	0.0915	-0.0206	0.235	0.2179	0.2229	0.2184	0.2214	0.1422	-0.0276	-0.0268	0.227	0.148181	0.134	0.177	0.2734	0.1676	0.1695	0.1696	0.2222	0.0412	0.2057	-0.0967	-0.0884	-0.0971
chr8:124608281-124608895 (-) // 42.32 // q24.13	F-box protein 32	FBXO32	241762_at	0.2032	0.2195	0.1354	0.1813	0.1022	0.0688	-0.036	0.2595	0.2295	0.2358	0.1982	0.2456	0.1808	0.0476	0.0448	0.0526	0.14805	0.2018	0.1895	0.1877	0.1316	0.1345	0.1341	0.197	0.0667	0.1813	0.0308	0.0393	0.0637
chr2:239754376-239754943 (-) // 86.41 // q37.3	Transcribed locus	---	240870_at	0.173	0.148	0.0908	0.2295	0.186	0.0741	-0.0393	0.2118	0.2364	0.2376	0.2255	0.2543	0.1506	0.0337	0.0178	0.1381	0.147994	0.2978	0.2016	0.2522	0.1067	0.1114	0.1118	0.2679	0.1457	0.2567	-0.015	-0.0002	-0.0135
chr2:69311057-69313134 (+) // 59.27 // p14	CDNA FLJ12293 fis, clone MAMMA1001815	---	232808_at	0.0909	0.0858	0.0684	0.155	0.0994	0.0181	-0.006	0.329	0.2974	0.2869	0.2248	0.315	0.2202	0.039	0.0647	0.0793	0.147994	0.1978	0.1492	0.1735	0.0632	0.0752	0.0746	0.0789	-0.0566	0.0881	0.0815	0.1112	0.1095
chr9:139462513-139470714 (-) // 87.63 // q34.3	nasal embryonic LHRH factor	NELF	221214_s_at	0.1475	0.1444	0.1404	0.252	0.2073	0.2323	-0.0138	0.1542	0.2199	0.1724	0.2251	0.1842	0.1384	0.0263	0.0137	0.1224	0.147919	0.2605	0.2224	0.2274	0.1572	0.161	0.1625	0.2042	0.0227	0.2001	-0.0654	-0.06	-0.0954
chr4:4912306-4916359 (+) // 83.13 // p16.2	msh homeobox 1	MSX1	205932_s_at	0.2367	0.2297	0.144	0.2157	0.1669	0.1403	0.004	0.1641	0.1509	0.171	0.1517	0.1652	0.0913	0.0328	0.0244	0.2772	0.147869	0.1069	0.1327	0.2015	0.1637	0.1638	0.1644	0.1428	0.0169	0.1335	0.1132	0.1081	0.1445
chr2:23784348-23784980 (+) // 89.91 // p24.1	kelch-like 29 (Drosophila)	KLHL29	229310_at	0.1312	0.1392	0.1559	0.1864	0.1503	0.1884	-0.0029	0.1969	0.1863	0.2064	0.1783	0.2042	0.1413	0.0428	0.0245	0.2363	0.147844	0.0805	0.1018	0.1917	0.1244	0.1221	0.1228	0.0794	-0.0314	0.077	-0.0948	-0.0919	-0.0978
chr6:116947244-116947697 (+) // 98.05 // q22.1	Transcribed locus	---	230254_at	0.139	0.1897	0.0868	0.1723	0.2024	0.1599	0.0407	0.2298	0.2356	0.2096	0.1584	0.2264	0.2076	-0.0562	-0.0512	0.2138	0.147788	0.128	0.1354	0.2297	0.1342	0.1371	0.1388	0.0872	-0.0143	0.0829	-0.0441	-0.0318	-0.0409
chr12:103937697-103938442 (-) // 65.18 // q23.3	Aldehyde dehydrogenase 1 family, member L2	ALDH1L2	231202_at	0.2106	0.2448	0.1508	0.171	0.1197	0.3292	0.1247	0.1308	0.1457	0.1464	0.1638	0.1405	0.1098	-0.0115	-0.0379	0.2262	0.147788	0.0301	0.0714	0.1353	0.1151	0.1124	0.115	0.0736	0.0037	0.0694	-0.0662	-0.0664	-0.0696
chr3:113806801-113842640 (-) // 94.9 // q13.2	coiled-coil domain containing 80	CCDC80	225242_s_at	0.1433	0.202	0.0458	0.0721	0.0624	0.252	0.0315	0.2692	0.2359	0.2615	0.1895	0.2549	0.1128	-0.0174	-0.0079	0.2568	0.147775	0.0297	0.0466	0.1801	0.0521	0.0541	0.0554	0.0117	-0.0347	0.0207	0.0459	0.0388	0.0537
chr21:26174732-26464956 (-) // 95.14 // q21.3	amyloid beta (A4) precursor protein (peptidase nexin-II, Alzheimer disease)	APP	200602_at	0.0853	0.1154	0.113	0.2085	0.1041	0.1401	0.0409	0.1879	0.2186	0.1948	0.2169	0.2003	0.1005	0.1981	0.0967	0.1398	0.147556	0.1314	0.1417	0.2051	0.1082	0.1113	0.1129	0.1308	0.0749	0.1548	0.0376	0.0349	0.0629
chr13:38998012-38999841 (-) // 95.33 // q13.3	Primary neuroblastoma cDNA, clone:Nbla03614, full insert sequence	---	232935_at	0.105	0.1067	0.0702	0.1345	0.0704	0.0744	-0.1078	0.3123	0.2916	0.3224	0.2673	0.3274	0.1798	-0.0209	-0.0275	0.2534	0.14745	0.1659	0.1439	0.2356	0.0821	0.0861	0.0868	0.1466	0.0022	0.1328	-0.0457	-0.0442	-0.0435
chr5:73016418-73187313 (+) // 90.04 // q13.2	Rho-guanine nucleotide exchange factor	RGNEF	1559706_at	0.1836	0.133	0.0902	0.1921	0.1138	0.0997	-0.0158	0.2023	0.1721	0.2176	0.192	0.2186	0.1211	0.1824	0.1649	0.0915	0.147444	0.1192	0.1251	0.1641	0.1058	0.1045	0.1078	0.1468	0.0162	0.148	0.0905	0.0855	0.1127
chrX:54963973-54974587 (+) // 94.12 // p11.21	trophinin	TRO	211701_s_at	0.1638	0.138	0.1712	0.2055	0.1848	0.1906	0.0651	0.2458	0.2153	0.24	0.2173	0.2357	0.14	-0.1159	-0.0972	0.1588	0.147425	0.105	0.1512	0.1621	0.1647	0.162	0.1631	0.126	-0.0045	0.1346	-0.0958	-0.0921	-0.095
chr15:21481923-21483507 (-) // 83.48 // q11.2	necdin homolog (mouse)	NDN	209550_at	0.1876	0.2356	0.1186	0.1242	0.1277	0.0811	-0.0349	0.2717	0.2462	0.2528	0.2195	0.2425	0.0996	-0.0884	-0.0714	0.3452	0.14735	0.0801	0.1272	0.2404	0.1369	0.1388	0.1389	0.0997	-0.0219	0.1066	-0.1127	-0.1126	-0.1135
chr5:14550084-14553158 (+) // 89.28 // p15.2	Triple functional domain (PTPRF interacting)	TRIO	216697_at	0.1426	0.1332	0.1473	0.2111	0.1575	0.165	0.001	0.2019	0.1912	0.2192	0.2124	0.2067	0.1296	0.0071	0.0036	0.2259	0.147206	0.1579	0.1611	0.3012	0.2004	0.1957	0.2007	0.1633	0.0337	0.1681	-0.0437	-0.0412	-0.0434
chr15:46957611-46959293 (+) // 99.17 // q21.1	EP300 interacting inhibitor of differentiation 1	EID1	211698_at	0.1504	0.2339	0.1203	0.1891	0.0672	0.2585	-0.017	0.1916	0.2427	0.2261	0.2639	0.2269	0.1321	-0.0114	-0.1165	0.1974	0.1472	0.1011	0.1179	0.2331	0.1252	0.1259	0.1267	0.131	0.0674	0.1443	-0.1186	-0.1191	-0.1219
chr5:153657689-153780737 (+) // 98.37 // q33.2	UDP-N-acetyl-alpha-D-galactosamine:polypeptide N-acetylgalactosaminyltransferase 10 (GalNAc-T10)	GALNT10	212256_at	0.1254	0.1416	0.0881	0.157	0.195	0.3346	0.1134	0.1753	0.2096	0.2005	0.2055	0.2055	0.1504	0.0016	-0.0443	0.0955	0.147169	0.0612	0.0686	0.1565	0.1066	0.1047	0.1071	0.1677	0.1838	0.1715	0.0731	0.0579	0.0742
chr7:78926097-78928276 (+) // 80.84 // q21.11	MRNA; cDNA DKFZp686I18116 (from clone DKFZp686I18116)	---	235267_at	0.1301	0.1551	0.1496	0.1707	0.1881	0.2929	0.0506	0.1818	0.1803	0.1759	0.2364	0.1685	0.2106	-0.0526	-0.0473	0.1634	0.147131	0.0868	0.1493	0.2099	0.2288	0.2255	0.2269	0.1202	0.0404	0.1352	-0.1009	-0.0969	-0.1134
chr6:35651422-35764692 (-) // 100.0 // p21.31	FK506 binding protein 5	FKBP5	204560_at	0.2268	0.1893	0.182	0.1757	0.2697	0.1428	0.0994	0.138	0.1256	0.1472	0.1794	0.1264	0.1329	0.004	0.0433	0.1703	0.14705	0.0811	0.2071	0.2431	0.3169	0.3128	0.3139	0.2812	0.0961	0.3001	-0.0834	-0.0864	-0.1078
chr1:212588665-212590581 (-) // 94.59 // q41	Full length insert cDNA clone ZE03F06	---	226282_at	0.1374	0.1972	0.0786	0.1416	0.102	0.2975	0.0988	0.2008	0.1624	0.1789	0.1602	0.1872	0.1878	0.0496	0.0156	0.1571	0.147044	0.0031	0.0197	0.079	0.043	0.0429	0.0451	-0.0472	-0.0823	-0.0306	0.0027	0.0124	0.012
chr3:120495909-120621657 (+) // 97.15 // q13.32	Cdc42 GTPase-activating protein	CDGAP	226057_at	0.178	0.1437	0.1418	0.1866	0.2815	0.1747	0.1442	0.1784	0.1772	0.1764	0.1804	0.1637	0.1779	-0.0429	-0.0247	0.1153	0.147013	0.1159	0.232	0.2221	0.2856	0.2807	0.2847	0.1577	0.0404	0.1528	-0.0806	-0.0756	-0.0919
chr1:32918564-32933460 (-) // 99.05 // p35.1	syncoilin, intermediate filament 1	SYNC1	221276_s_at	0.2519	0.3828	0.0843	0.1036	0.1309	0.3317	0.1353	0.1492	0.1558	0.1515	0.1674	0.1442	0.1088	-0.0412	-0.0524	0.1471	0.146931	0.0269	0.0552	0.1228	0.077	0.0756	0.0771	0.0312	0.0572	0.0396	-0.0744	-0.0655	-0.0796
chr2:201158782-201244459 (+) // 93.09 // q33.1	aldehyde oxidase 1	AOX1	205083_at	0.174	0.1652	0.1524	0.1981	0.2213	0.1373	0.0276	0.1857	0.171	0.1991	0.1931	0.183	0.1309	0.0024	0.0059	0.2036	0.146913	0.2151	0.3298	0.418	0.346	0.3478	0.3531	0.1953	0.0492	0.1899	-0.0648	-0.0616	-0.0684
chr1:223741159-223741631 (-) // 96.52 // q42.12	enabled homolog (Drosophila)	ENAH	228310_at	0.173	0.1784	0.1659	0.2408	0.0977	0.1761	-0.0711	0.2357	0.2115	0.237	0.2091	0.235	0.1073	-0.0175	-0.0248	0.1957	0.146863	0.1075	0.1214	0.1969	0.1211	0.122	0.123	0.1307	-0.0171	0.1383	-0.0417	-0.0398	-0.0348
chr5:66445689-66498848 (+) // 98.21 // q12.3	microtubule associated serine/threonine kinase family member 4 /// hypothetical protein LOC100128443	LOC100128443 /// MAST4	40016_g_at	0.1363	0.148	0.1808	0.1875	0.1154	0.0376	-0.0506	0.1839	0.187	0.1988	0.1458	0.199	0.08	0.2059	0.2143	0.1793	0.146813	0.1016	0.0915	0.182	0.0536	0.0559	0.0565	0.154	-0.0095	0.1384	0.0895	0.0872	0.1242
chr19:11167749-11168860 (-) // 48.46 // p13.2	CDNA clone IMAGE:4561752	---	1569602_at	0.1002	0.0649	0.0718	0.1235	0.1943	0.0771	0.1161	0.3063	0.245	0.2267	0.2045	0.2414	0.2402	0.0081	0.0515	0.0762	0.146738	0.1616	0.1293	0.115	0.0521	0.0625	0.0629	0.0794	-0.0518	0.085	0.0008	0.0263	-0.0057
chr5:39408897-39430257 (-) // 98.91 // p13.1	disabled homolog 2, mitogen-responsive phosphoprotein (Drosophila)	DAB2	210757_x_at	0.0888	0.0769	0.0902	0.1655	0.202	0.1773	0.0001	0.2728	0.2322	0.2517	0.2129	0.2642	0.2283	-0.0333	-0.0354	0.1521	0.146644	0.1104	0.1185	0.199	0.1475	0.1509	0.1527	0.0979	-0.0154	0.1073	-0.0132	-0.0098	-0.0075
chr19:7064325-7067184 (-) // 95.44 // p13.2	insulin receptor	INSR	226212_s_at	0.1878	0.2034	0.138	0.1758	0.175	0.0758	-0.0648	0.1704	0.1913	0.1939	0.2121	0.1748	0.0754	0.1079	0.0964	0.2328	0.146625	0.1052	0.1711	0.2661	0.1965	0.195	0.2022	0.2283	0.0663	0.2772	0.0022	-0.01	-0.0189
chr19:51605425-51608681 (-) // 91.5 // q13.32	coiled-coil domain containing 8	CCDC8	223495_at	0.168	0.1736	0.1221	0.2142	0.1028	0.0606	0.0315	0.254	0.2345	0.2389	0.1855	0.262	0.1528	0.0093	0.0027	0.1331	0.1466	0.093	0.0678	0.1072	0.0453	0.051	0.0507	0.0321	-0.0575	0.0477	0.1192	0.1253	0.1586
chr18:307989-308506 (-) // 43.17 // p11.32	Transcribed locus	---	240397_x_at	0.1101	0.1385	0.13	0.1416	0.1045	0.1477	0.0183	0.2912	0.2607	0.2436	0.2262	0.244	0.1826	-0.0507	-0.0145	0.1716	0.146588	0.0997	0.0963	0.1645	0.082	0.0863	0.0876	0.0959	0.0127	0.0955	-0.0615	-0.052	-0.0665
chr5:135542472-135543091 (+) // 68.52 // q31.2	SMAD family member 5	SMAD5	235451_at	0.1427	0.2018	0.0788	0.1586	0.0499	0.2892	0.0264	0.1881	0.1614	0.1508	0.1508	0.1603	0.1743	0.1634	0.0995	0.1493	0.146581	0.0321	0.0747	0.1484	0.1348	0.134	0.1369	0.0627	0.0025	0.06	-0.043	-0.0476	-0.0479
chr1:226172980-226173443 (-) // 97.89 // q42.13	wingless-type MMTV integration site family, member 9A	WNT9A	230643_at	0.2006	0.245	0.1465	0.2117	0.1052	0.1271	0.1336	0.1354	0.1384	0.1175	0.1311	0.1241	0.1212	0.1783	0.1568	0.0714	0.146494	0.081	0.0877	0.112	0.0766	0.0789	0.0792	0.0926	0.0074	0.0917	0.0964	0.1004	0.1015
chr1:156332781-156336676 (+) // 92.47 // q23.1	kin of IRRE like (Drosophila)	KIRREL	225303_at	0.1115	0.1569	0.0538	0.1166	0.0616	0.3163	0.1351	0.2367	0.2154	0.2177	0.1949	0.2296	0.1942	-0.0262	-0.0441	0.171	0.146313	0.0138	0.0143	0.082	0.0346	0.0356	0.038	-0.0263	-0.0539	-0.0159	-0.0344	-0.0265	-0.0332
chr6:99729281-99730302 (+) // 94.56 // q16.2 /// chr4:104220082-104240428 (-) // 97.61 // q24	3-hydroxybutyrate dehydrogenase, type 2	BDH2	218285_s_at	0.1389	0.1204	0.1472	0.1893	0.1644	0.0699	-0.008	0.2605	0.2205	0.2495	0.2137	0.2423	0.1297	0.0026	0.0263	0.1737	0.146306	0.1262	0.1989	0.2589	0.2034	0.2042	0.206	0.1558	0.0315	0.1494	0.0559	0.0426	0.0722
chr3:100840147-100998889 (+) // 96.12 // q12.1	collagen, type VIII, alpha 1	COL8A1	214587_at	0.1751	0.1834	0.1248	0.1708	0.2443	0.2988	0.1965	0.1447	0.1441	0.1505	0.1554	0.1417	0.1304	-0.0105	-0.0101	0.1002	0.146256	0.062	0.1731	0.2093	0.2967	0.2834	0.2861	0.0922	0.0229	0.1004	-0.0312	-0.0278	-0.0353
chr12:54405524-54409061 (-) // 100.0 // q13.2	CD63 molecule	CD63	200663_at	0.1235	0.138	0.0644	0.1192	0.1164	0.1919	-0.0506	0.2282	0.2123	0.2222	0.1897	0.2271	0.1851	0.1105	0.0848	0.1766	0.146206	0.0791	0.0708	0.1632	0.092	0.0975	0.0994	0.0379	-0.0977	0.0562	0.187	0.1765	0.1932
[truncated: 53,401 more rows]

## Sheet: Table S6
Table S6. The sequence of siRNA pool against SIX1, FOXC1, FOXC2, FOXD1, BNC2, KLF5, MEOX2, PTGDR and EYA2
Gene_Symbol	Target_RefSeq	Sense_Sequence	Antisense_Sequence
SIX1	NM_005982	GUCCUUCUGCUGCAGGGCAdTdT	UGCCCUGCAGCAGAAGGACdTdT
[truncated: 26 more rows]

## Sheet: Table S7
Table S7. The sequence of lentivirus shRNA against SIX1, LEPR and LacZ
[truncated: 8 more rows]

[truncated: 10 more sheets: Table S8, Table S9, Table S10, Table S11, Table S12, Table S13, Table S14, Table S15, Table S16, Table S17]
